# Supplementary material for: Characterization and biological function analysis of endogenous peptides derived from donkey colostrum proteins
Source: Royal Society of Chemistry journal article supplement (doi:10.1039/d3fo01703f), 2023-01-01
Supplement: d3fo01703f3.xlsx [file d3fo01703f3.xlsx]

## Sheet: Table S10
Table S10. Identification of endogenous peptides by de novo in both TCA precipitation (M1) and ultrafiltration (M2) methods (ALC≥50%).
Source File	Peptide	Precursor Id	Tag Length	Denovo Score	ALC (%)	length	m/z	1/k0 Range	Area	Mass	ppm	Accession	PTM	mode
M2-1_RB1_1_8659.d	DPDTAHPHL	F6:15026	9	99	99	9	501.737	0.8643-0.8808	3608.7	1001.46	3.1	A0A8C4LD23		HCD
M1_RB1_1_8657.d	LELTKEEKLYLK	F3:34740	12	99	99	12	753.942	1.0865-1.1028	966.06	1505.87	-0.3	A0A8C4M7I4:A0A8C4LTE2:A0A8C4M6N0:A0A8C4PQ06:A0A8C4M9C8:A0A8C4M5V6:A0A8C4MQW4:A0A8C4PU43		HCD
M2-1_RB1_1_8659.d	DPDTAHPHL	F6:14913	9	99	99	9	501.737	0.8636-0.8802	3608.7	1001.46	3.1	A0A8C4LD23		HCD
M1_3_RB1_1_8834.d	HESTNLSQEKYK	F2:8789	12	99	99	12	732.364	1.0134-1.0298	9395.7	1462.71	5.2	B7VGF9:C1L3G3:A0A8C4MHP1:A0A8C4MKT7:A0A8C4MCS3		HCD
M1_2_RB1_1_8832.d	HESTNLSQEKYK	F1:8821	12	99	99	12	732.364	1.0141-1.0305	9610.9	1462.71	5.3	B7VGF9:C1L3G3:A0A8C4MHP1:A0A8C4MKT7:A0A8C4MCS3		HCD
M1_RB1_1_8657.d	HESTNLSQEKYK	F3:8763	12	99	99	12	732.362	1.0237-1.0401	9424.3	1462.71	3.1	B7VGF9:C1L3G3:A0A8C4MHP1:A0A8C4MKT7:A0A8C4MCS3		HCD
M1_3_RB1_1_8834.d	HESTNLSQEKYK	F2:8743	12	99	99	12	732.364	1.0107-1.0271	9395.7	1462.71	5.2	B7VGF9:C1L3G3:A0A8C4MHP1:A0A8C4MKT7:A0A8C4MCS3		HCD
M2-1_2_RB1_1_8837.d	KHESTNLSQEKYK	F4:4336	13	99	99	13	531.277	0.8097-0.8263	8607.6	1590.8	5.8	B7VGF9:C1L3G3:A0A8C4MHP1:A0A8C4MKT7:A0A8C4MCS3		HCD
M1_2_RB1_1_8832.d	SPLPN(+.98)LFPADFK	F1:57113	12	99	99	12	673.856	0.9634-0.9798	105660	1345.69	4.7	A0A8C4LDF2:A0A8C4LHM4:A0A8C4LGD8	Deamidation (NQ)	HCD
M1_2_RB1_1_8832.d	HESTNLSQEKYK	F1:8811	12	99	99	12	732.364	1.0113-1.0278	9610.9	1462.71	5.3	B7VGF9:C1L3G3:A0A8C4MHP1:A0A8C4MKT7:A0A8C4MCS3		HCD
M1_RB1_1_8657.d	DPQSHKVLL	F3:26286	9	99	99	9	518.795	0.8843-0.9008	3287.4	1035.57	3.9	A0A8C4MBA7		HCD
M1_RB1_1_8657.d	VKLSEADKKKV	F3:4420	11	99	99	11	415.588	0.7390-0.7556	412.83	1243.75	-5.4	A0A8C4M816		HCD
M1_3_RB1_1_8834.d	PNHFRPR	F2:5058	7	99	99	7	462.253	0.7917-0.8083	0	922.489	2.4	A0A8C4LEB1		HCD
M2-1_RB1_1_8659.d	HESTNLSQEKYK	F6:6276	12	99	99	12	732.363	1.0243-1.0407	10238	1462.71	4.5	B7VGF9:C1L3G3:A0A8C4MHP1:A0A8C4MKT7:A0A8C4MCS3		HCD
M1_3_RB1_1_8834.d	SPLPN(+.98)LFPADFK	F2:57116	12	99	99	12	673.856	0.9647-0.9812	116350	1345.69	4.4	A0A8C4LDF2:A0A8C4LHM4:A0A8C4LGD8	Deamidation (NQ)	HCD
M1_RB1_1_8657.d	LETKEEKLYL	F3:36957	10	99	99	10	633.355	0.9901-1.0066	4538.9	1264.69	2.9	A0A8C4M7I4		HCD
M1_2_RB1_1_8832.d	ELTKEEKLYLK	F1:25345	11	99	99	11	465.271	0.8007-0.8173	8070.7	1392.79	3.4	A0A8C4M7I4:A0A8C4LTE2:A0A8C4MQW4:A0A8C4PU43		HCD
M1_RB1_1_8657.d	HESTNLSQEKY	F3:13740	11	99	99	11	668.313	0.9531-0.9696	12564	1334.61	1.4	B7VGF9:C1L3G3		HCD
M1_RB1_1_8657.d	ELTKEEKLYLK	F3:25303	11	99	99	11	465.27	0.8097-0.8263	8621.2	1392.79	0.7	A0A8C4M7I4:A0A8C4LTE2:A0A8C4MQW4:A0A8C4PU43		HCD
M1_2_RB1_1_8832.d	DPQSHKVLL	F1:26442	9	99	99	9	518.795	0.8712-0.8877	1490.1	1035.57	4.8	A0A8C4MBA7		HCD
M1_3_RB1_1_8834.d	SPLPN(+.98)LFPADFK	F2:57059	12	99	99	12	673.856	0.9874-1.0038	116350	1345.69	4.4	A0A8C4LDF2:A0A8C4LHM4:A0A8C4LGD8	Deamidation (NQ)	HCD
M1_2_RB1_1_8832.d	LPVHLL	F1:47716	6	98	98	6	346.231	0.7459-0.7626	5156.6	690.443	5.8	D2EC27		HCD
M2-1_2_RB1_1_8837.d	HESTNLSQEKYK	F4:6235	12	98	98	12	732.36	1.0113-1.0278	11129	1462.71	0.4	B7VGF9:C1L3G3:A0A8C4MHP1:A0A8C4MKT7:A0A8C4MCS3		HCD
M2-1_RB1_1_8659.d	DDDKLCKTKKL	F6:2013	11	98	98	11	436.237	0.7376-0.7542	6937.3	1305.7	-6.3	A0A8C4PN19		HCD
M1_2_RB1_1_8832.d	LETKEEKLYL	F1:37470	10	98	98	10	633.356	0.9764-0.9929	4352.5	1264.69	4.5	A0A8C4M7I4		HCD
M1_RB1_1_8657.d	ELTKEEKLY	F3:23390	9	98	98	9	576.813	0.9586-0.9750	6361.4	1151.61	4.4	A0A8C4M7I4:A0A8C4LTE2		HCD
M2-1_3_RB1_1_8839.d	HESTNLSQEKYK	F5:6314	12	98	98	12	732.361	1.0134-1.0298	11020	1462.71	2.2	B7VGF9:C1L3G3:A0A8C4MHP1:A0A8C4MKT7:A0A8C4MCS3		HCD
M1_RB1_1_8657.d	LQ(+.98)LTKEEKLYKL	F3:34680	12	98	98	12	502.963	0.8208-0.8374	7004.5	1505.87	-2.2	A0A8C4M7I4:A0A8C4LTE2:A0A8C4LBN5	Deamidation (NQ)	HCD
M1_RB1_1_8657.d	M(+42.01)ERAETLLR	F3:43204	9	98	98	9	580.809	0.9524-0.9689	7925.5	1159.6	1.5		Acetylation (N-term)	HCD
M1_2_RB1_1_8832.d	LETKEEKLYL	F1:37508	10	98	98	10	633.356	0.9778-0.9942	4352.5	1264.69	4.5	A0A8C4M7I4		HCD
M1_2_RB1_1_8832.d	PNHFRPR	F1:5072	7	98	98	7	462.254	0.8111-0.8277	2323.7	922.489	5.5	A0A8C4LEB1		HCD
M1_3_RB1_1_8834.d	LELTKEEKLYLK	F2:35270	12	98	98	12	753.947	1.0701-1.0865	964.56	1505.87	5.4	A0A8C4M7I4:A0A8C4LTE2:A0A8C4M6N0:A0A8C4PQ06:A0A8C4M9C8:A0A8C4M5V6:A0A8C4MQW4:A0A8C4PU43		HCD
M1_RB1_1_8657.d	SPLPN(+.98)LFPADFK	F3:56130	12	98	98	12	673.854	0.9737-0.9901	99611	1345.69	1.6	A0A8C4LDF2:A0A8C4LHM4:A0A8C4LGD8	Deamidation (NQ)	HCD
M1_2_RB1_1_8832.d	SPLPN(+.98)LFPADFK	F1:57058	12	98	98	12	673.856	0.9860-1.0024	105660	1345.69	4.7	A0A8C4LDF2:A0A8C4LHM4:A0A8C4LGD8	Deamidation (NQ)	HCD
M1_RB1_1_8657.d	SPLPN(+.98)LFPADFK	F3:56070	12	98	98	12	673.857	0.9977-1.0141	43507	1345.69	6.5	A0A8C4LDF2:A0A8C4LHM4:A0A8C4LGD8	Deamidation (NQ)	HCD
M1_3_RB1_1_8834.d	EANYLGADKYFHA	F2:39079	13	98	98	13	749.856	1.0175-1.0339	7409.9	1497.69	5.2	A0A8C4LEB1:A0A8C4MGQ5		HCD
M1_RB1_1_8657.d	DPNHFRPR	F3:8692	8	98	98	8	519.767	0.8684-0.8850	23882	1037.52	4.2	A0A8C4LEB1		HCD
M1_3_RB1_1_8834.d	PNHFRPR	F2:5049	7	98	98	7	462.254	0.8111-0.8277	2943.6	922.489	5.9	A0A8C4LEB1		HCD
M1_2_RB1_1_8832.d	EANYLGADKYFHA	F1:39251	13	98	98	13	749.855	1.0182-1.0346	8200.1	1497.69	4.7	A0A8C4LEB1:A0A8C4MGQ5		HCD
M1_2_RB1_1_8832.d	ELTKEEKLY	F1:23589	9	98	98	9	576.812	0.9503-0.9668	7992.7	1151.61	1.1	A0A8C4M7I4:A0A8C4LTE2		HCD
M1_RB1_1_8657.d	DPQSHKVLL	F3:26213	9	98	98	9	518.795	0.8898-0.9063	3287.4	1035.57	3.9	A0A8C4MBA7		HCD
M1_RB1_1_8657.d	HESTNLSQEKY	F3:13662	11	98	98	11	668.313	0.9517-0.9682	12564	1334.61	1.4	B7VGF9:C1L3G3		HCD
M1_RB1_1_8657.d	EANYLGADKYFHA	F3:38523	13	98	98	13	749.852	1.0284-1.0448	7806	1497.69	0.2	A0A8C4LEB1:A0A8C4MGQ5		HCD
M2-1_2_RB1_1_8837.d	LETKEEKLYL	F4:26482	10	98	98	10	633.356	0.9696-0.9860	4285.1	1264.69	4	A0A8C4M7I4		HCD
M1_3_RB1_1_8834.d	MADQ(+.98)AGSKADPED	F2:10866	13	98	98	13	668.275	0.9201-0.9366	3063.8	1334.53	3.9		Deamidation (NQ)	HCD
M2-1_2_RB1_1_8837.d	DPQSHKVLL	F4:20690	9	98	98	9	518.794	0.8574-0.8739	3868.2	1035.57	1.9	A0A8C4MBA7		HCD
M1_3_RB1_1_8834.d	KHESTNLSQEKYK	F2:6780	13	98	98	13	531.275	0.8049-0.8215	5271.7	1590.8	2.6	B7VGF9:C1L3G3:A0A8C4MHP1:A0A8C4MKT7:A0A8C4MCS3		HCD
M2-1_2_RB1_1_8837.d	EEKLYLK	F4:16548	7	98	98	7	461.769	0.8221-0.8387	8546.2	921.517	5.7	A0A8C4MQW4:A0A8C4PU43		HCD
M1_2_RB1_1_8832.d	WKKATLH	F1:8774	7	98	98	7	442.262	0.7855-0.8021	1474.1	882.508	3	A0A8C4LSV0		HCD
M1_3_RB1_1_8834.d	HESTNLSQEYK	F2:13684	11	98	98	11	668.315	0.9448-0.9613	13617	1334.61	4.5	C1L3G3		HCD
M1_3_RB1_1_8834.d	DPQSHKVL	F2:12429	8	98	98	8	462.253	0.7792-0.7958	1876.7	922.487	3.7	A0A8C4MBA7		HCD
M1_RB1_1_8657.d	DTFSSKEKLLEELK	F3:42044	14	98	98	14	556.299	0.8450-0.8615	564.91	1665.88	-3.8	A0A8C4LD23:A0A8C4MGS3:A0A8C4PJR0:A0A8C4M524:A0A8C4MDU2:A0A8C4KUH1:A0A8C4KVX9		HCD
M2-1_RB1_1_8659.d	DPQSHKVLL	F6:20421	9	98	98	9	518.794	0.8643-0.8808	4353.7	1035.57	2.5	A0A8C4MBA7		HCD
M2-1_2_RB1_1_8837.d	ELTKEEKLYLK	F4:20116	11	98	98	11	465.271	0.7875-0.8042	8523.2	1392.79	2.3	A0A8C4M7I4:A0A8C4LTE2:A0A8C4MQW4:A0A8C4PU43		HCD
M1_3_RB1_1_8834.d	LQ(+.98)LTKEEKLYKL	F2:35264	12	98	98	12	502.965	0.8125-0.8291	6860.9	1505.87	2	A0A8C4M7I4:A0A8C4LTE2:A0A8C4LBN5	Deamidation (NQ)	HCD
M1_RB1_1_8657.d	PPPPPP	F3:16121	6	98	98	6	601.332	1.1565-1.1728	0	600.327	-3.5	A0A8C4MTS8:A0A8C4LUM8:A0A8C4KXX4:A0A8C4M9E1:A0A8C4M3B4:A0A8C4LMY3:A0A8C4LNL1:A0A8C4LAX9:A0A8C4L5S0:A0A8C4LV13:A0A8C4LX24:A0A8C4LYB5:A0A8C4MZE5:A0A8C4LIZ6:A0A8C4LIA5:A0A8C4MVP1:A0A8C4MF50:A0A8C4MIB0:A0A8C4M7H9:A0A8C4MP75:A0A8C4L1M4:A0A8C4L0M4:A0A8C4MG23:A0A8C4MAY6:A0A8C4LUX7:A0A8C4NB56:A0A8C4MTY2:A0A8C4N2U9:A0A8C4LIL0:A0A8C4LI36:A0A8C4LI35:A0A8C4MLD5:A0A8C4MJU3:A0A8C4MMK2:A0A8C4PSM7:A0A8C4MLT9:A0A…		HCD
M1_2_RB1_1_8832.d	SPLPN(+.98)LFPADFK	F1:57082	12	98	98	12	673.855	0.9345-0.9510	13983	1345.69	2.2	A0A8C4LDF2:A0A8C4LHM4:A0A8C4LGD8	Deamidation (NQ)	HCD
M2-1_RB1_1_8659.d	ELTKEEKLYLK	F6:19947	11	98	98	11	697.403	1.0141-1.0305	2712.8	1392.79	3.3	A0A8C4M7I4:A0A8C4LTE2:A0A8C4MQW4:A0A8C4PU43		HCD
M1_2_RB1_1_8832.d	N(+.98)PVLRKL	F1:25384	7	98	98	7	420.772	0.7903-0.8069	1367.8	839.523	6.8	A0A8C4MK65	Deamidation (NQ)	HCD
M1_2_RB1_1_8832.d	HESTNLSQEKY	F1:13888	11	98	98	11	668.316	0.9421-0.9586	13408	1334.61	5.7	B7VGF9:C1L3G3		HCD
M1_2_RB1_1_8832.d	HESTNLSQEKY	F1:13752	11	98	98	11	668.316	0.9435-0.9599	13408	1334.61	5.7	B7VGF9:C1L3G3		HCD
M1_RB1_1_8657.d	KHESTNLSQEKYK	F3:6637	13	98	98	13	796.409	1.0605-1.0769	4122.1	1590.8	2.6	B7VGF9:C1L3G3:A0A8C4MHP1:A0A8C4MKT7:A0A8C4MCS3		HCD
M2-1_2_RB1_1_8837.d	ELTKEEKLY	F4:18604	9	98	98	9	576.813	0.9070-0.9235	34358	1151.61	3.3	A0A8C4M7I4:A0A8C4LTE2		HCD
M1_RB1_1_8657.d	PPPPPP	F3:17885	6	98	98	6	601.332	1.1429-1.1592	0	600.327	-3.5	A0A8C4MTS8:A0A8C4LUM8:A0A8C4KXX4:A0A8C4M9E1:A0A8C4M3B4:A0A8C4LMY3:A0A8C4LNL1:A0A8C4LAX9:A0A8C4L5S0:A0A8C4LV13:A0A8C4LX24:A0A8C4LYB5:A0A8C4MZE5:A0A8C4LIZ6:A0A8C4LIA5:A0A8C4MVP1:A0A8C4MF50:A0A8C4MIB0:A0A8C4M7H9:A0A8C4MP75:A0A8C4L1M4:A0A8C4L0M4:A0A8C4MG23:A0A8C4MAY6:A0A8C4LUX7:A0A8C4NB56:A0A8C4MTY2:A0A8C4N2U9:A0A8C4LIL0:A0A8C4LI36:A0A8C4LI35:A0A8C4MLD5:A0A8C4MJU3:A0A8C4MMK2:A0A8C4PSM7:A0A8C4MLT9:A0A…		HCD
M2-1_RB1_1_8659.d	KHESTNLSQEKYK	F6:4459	13	98	98	13	531.275	0.8152-0.8318	8110.4	1590.8	2.4	B7VGF9:C1L3G3:A0A8C4MHP1:A0A8C4MKT7:A0A8C4MCS3		HCD
M1_RB1_1_8657.d	SPLPDLFPADFK	F3:56048	12	98	98	12	673.857	0.9963-1.0127	43507	1345.69	6.5	A0A8C4L6A6		HCD
M1_2_RB1_1_8832.d	HESTNLSQEKY	F1:13774	11	98	98	11	668.316	0.9448-0.9613	13408	1334.61	5.7	B7VGF9:C1L3G3		HCD
M1_RB1_1_8657.d	ELTKEEKLYL	F3:36878	10	98	98	10	633.355	0.9881-1.0045	4538.9	1264.69	2.9	A0A8C4M7I4:A0A8C4LTE2		HCD
M1_RB1_1_8657.d	TPKKPKKA	F3:1426	8	98	98	8	449.299	0.7882-0.8049	3452.4	896.581	2.6	A0A8C4L7E5:A0A8C4LD74:A0A8C4PJP9:A0A8C4LGI0:A0A8C4LH82:A0A8C4KWP0:A0A8C4MPW1:A0A8C4MUI6		HCD
M1_2_RB1_1_8832.d	PPPPPP	F1:18037	6	98	98	6	601.335	1.1314-1.1477	0	600.327	1.6	A0A8C4MTS8:A0A8C4LUM8:A0A8C4KXX4:A0A8C4M9E1:A0A8C4M3B4:A0A8C4LMY3:A0A8C4LNL1:A0A8C4LAX9:A0A8C4L5S0:A0A8C4LV13:A0A8C4LX24:A0A8C4LYB5:A0A8C4MZE5:A0A8C4LIZ6:A0A8C4LIA5:A0A8C4MVP1:A0A8C4MF50:A0A8C4MIB0:A0A8C4M7H9:A0A8C4MP75:A0A8C4L1M4:A0A8C4L0M4:A0A8C4MG23:A0A8C4MAY6:A0A8C4LUX7:A0A8C4NB56:A0A8C4MTY2:A0A8C4N2U9:A0A8C4LIL0:A0A8C4LI36:A0A8C4LI35:A0A8C4MLD5:A0A8C4MJU3:A0A8C4MMK2:A0A8C4PSM7:A0A8C4MLT9:A0A…		HCD
M1_RB1_1_8657.d	LVHQHQTTMDPQSHKVLL	F3:25425	18	98	98	18	704.707	0.9627-0.9792	6114.5	2111.09	1.7	B7VGF9:A0A8C4MBA7		HCD
M2-1_RB1_1_8659.d	HESTNLSQEK	F6:3413	10	98	98	10	586.783	0.9001-0.9167	11585	1171.55	3.8	B7VGF9:C1L3G3		HCD
M2-1_2_RB1_1_8837.d	HESTNLSQEK	F4:3299	10	98	98	10	586.784	0.8953-0.9118	8894.5	1171.55	5.3	B7VGF9:C1L3G3		HCD
M1_3_RB1_1_8834.d	DPQSHKVLL	F2:26314	9	98	98	9	518.794	0.8808-0.8974	0	1035.57	2.7	A0A8C4MBA7		HCD
M1_RB1_1_8657.d	LQ(+.98)LTKEEKLYLK	F3:34785	12	98	98	12	502.963	0.8194-0.8360	7004.5	1505.87	-2.2	A0A8C4M7I4:A0A8C4LTE2:A0A8C4MQW4:A0A8C4PU43	Deamidation (NQ)	HCD
M1_3_RB1_1_8834.d	HESTNLSQEKY	F2:13745	11	98	98	11	668.315	0.9435-0.9599	13617	1334.61	4.5	B7VGF9:C1L3G3		HCD
M2-1_3_RB1_1_8839.d	ELTKEEKLY	F5:18692	9	98	98	9	576.813	0.9063-0.9228	34754	1151.61	3.5	A0A8C4M7I4:A0A8C4LTE2		HCD
M1_2_RB1_1_8832.d	M(+42.01)ERAQ(+.98)TLLR	F1:44156	9	98	98	9	580.812	0.9421-0.9586	7108.1	1159.6	6.1		Acetylation (N-term); Deamidation (NQ)	HCD
M2-1_3_RB1_1_8839.d	ELTKEEKLY	F5:18749	9	98	98	9	576.813	0.9077-0.9242	34754	1151.61	3.5	A0A8C4M7I4:A0A8C4LTE2		HCD
M2-1_RB1_1_8659.d	LETKEEKLYL	F6:26221	10	98	98	10	633.354	0.9771-0.9935	4200.3	1264.69	1.1	A0A8C4M7I4		HCD
M2-1_RB1_1_8659.d	DPQSHKVLL	F6:20470	9	98	98	9	518.794	0.8629-0.8795	4353.7	1035.57	2.5	A0A8C4MBA7		HCD
M1_RB1_1_8657.d	TPKKPK	F3:1384	6	98	98	6	349.73	0.7619-0.7785	1419.8	697.449	-4.3	A0A8C4MPW1:A0A8C4MUI6		HCD
M2-1_2_RB1_1_8837.d	ELTKEEKLYLK	F4:20072	11	98	98	11	465.271	0.7841-0.8007	8523.2	1392.79	2.3	A0A8C4M7I4:A0A8C4LTE2:A0A8C4MQW4:A0A8C4PU43		HCD
M1_3_RB1_1_8834.d	WKKATLH	F2:8739	7	98	98	7	442.264	0.7861-0.8028	1426.4	882.508	5.7	A0A8C4LSV0		HCD
M1_3_RB1_1_8834.d	KVM(+15.99)PFLK	F2:23157	7	98	98	7	439.763	0.8201-0.8367	915.72	877.51	1.4	D2EC27	Oxidation (M)	HCD
M2-1_RB1_1_8659.d	EEKLYLK	F6:16462	7	98	98	7	461.767	0.8304-0.8470	8042.6	921.517	2.6	A0A8C4MQW4:A0A8C4PU43		HCD
M1_3_RB1_1_8834.d	TPKKPK	F2:1430	6	98	98	6	349.732	0.7556-0.7723	1580.2	697.449	2.4	A0A8C4MPW1:A0A8C4MUI6		HCD
M1_3_RB1_1_8834.d	ELTKEEKLY	F2:23612	9	98	98	9	576.812	0.9503-0.9668	7174.3	1151.61	1.1	A0A8C4M7I4:A0A8C4LTE2		HCD
M1_3_RB1_1_8834.d	QEQ(+.98)KKKKKL	F2:1467	9	98	98	9	579.864	0.9036-0.9201	2145.6	1157.71	0.1	A0A8C4L1V5:A0A8C4L4B8:A0A8C4MD96:A0A8C4L5S0:A0A8C4LAH0:A0A8C4MZE5:A0A8C4MLY4:A0A8C4MMG4:A0A8C4MP75:A0A8C4MAC7:A0A8C4PQV7:A0A8C4MG23:A0A8C4MP98:A0A8C4LIL0:A0A8C4LI36:A0A8C4MLD5:A0A8C4MJU3:A0A8C4MMK2:A0A8C4PSM7:A0A8C4MLT9:A0A8C4PSM5:A0A8C4L946:A0A8C4LA58:A0A8C4L2G1:A0A8C4L6W9:A0A8C4KT44:A0A8C4MHA7:A0A8C4LC31:A0A8C4MGD3:A0A8C4LUP4:A0A8C4LX95:A0A8C4MEI5:A0A8C4MEJ9:A0A8C4M6Y4:A0A8C4M530:A0A8C4MEG2:A0A…	Deamidation (NQ)	HCD
M1_RB1_1_8657.d	NHFRPR	F3:3654	6	98	98	6	413.726	0.7868-0.8035	1662.3	825.436	1.9			HCD
M2-1_3_RB1_1_8839.d	ELTKEEKLYLK	F5:20207	11	98	98	11	465.27	0.7841-0.8007	8487	1392.79	1.6	A0A8C4M7I4:A0A8C4LTE2:A0A8C4MQW4:A0A8C4PU43		HCD
M1_2_RB1_1_8832.d	WPELE	F1:47649	5	98	98	5	673.321	1.1992-1.2155	0	672.312	3.1			HCD
M1_2_RB1_1_8832.d	KPSYYLR	F1:17204	7	98	98	7	463.76	0.8367-0.8532	324.86	925.502	3.3	A0A8C4MSR3		HCD
M2-1_2_RB1_1_8837.d	HESTNLSQEK	F4:3386	10	98	98	10	586.784	0.8891-0.9056	8894.5	1171.55	5.3	B7VGF9:C1L3G3		HCD
M2-1_RB1_1_8659.d	HESTNLSQEKY	F6:10878	11	98	98	11	668.316	0.9442-0.9606	16558	1334.61	4.6	B7VGF9:C1L3G3		HCD
M2-1_2_RB1_1_8837.d	DLDDKLLK	F4:20702	8	98	98	8	480.276	0.8381-0.8546	1284.5	958.533	3.9			HCD
M1_RB1_1_8657.d	LPVHLL	F3:46700	6	98	98	6	346.23	0.7529-0.7695	4885.8	690.443	3.6	D2EC27		HCD
M1_3_RB1_1_8834.d	LPDKY	F2:16547	5	98	98	5	635.34	1.1979-1.2141	0	634.333	0.7			HCD
M1_3_RB1_1_8834.d	DRLEQLK	F2:15686	7	97	97	7	451.261	0.8208-0.8374	701.54	900.503	5.4	A0A8C4MAK5		HCD
M1_RB1_1_8657.d	KKATLHAVDVT	F3:15493	11	97	97	11	591.847	0.9056-0.9222	2945.9	1181.68	2.1	A0A8C4LSV0		HCD
M1_2_RB1_1_8832.d	HESTNLSQEKY	F1:13786	11	97	97	11	668.316	0.9366-0.9531	13408	1334.61	5.7	B7VGF9:C1L3G3		HCD
M1_3_RB1_1_8834.d	ELTKEEKLYLK	F2:25340	11	97	97	11	465.272	0.7958-0.8125	7408.8	1392.79	4.9	A0A8C4M7I4:A0A8C4LTE2:A0A8C4MQW4:A0A8C4PU43		HCD
M2-1_RB1_1_8659.d	ELTKEEKLYL	F6:26253	10	97	97	10	633.354	0.9778-0.9942	4200.3	1264.69	1.1	A0A8C4M7I4:A0A8C4LTE2		HCD
M2-1_3_RB1_1_8839.d	DELVKKL	F5:18113	7	97	97	7	422.761	0.7660-0.7827	676.31	843.506	1	A0A8C4L9Z3:A0A8C4LBK0:A0A8C4LEL1:A0A8C4LGW5:A0A8C4LB42:A0A8C4LJD7:A0A8C4LKU6		HCD
M1_3_RB1_1_8834.d	DPNHFRPR	F2:8684	8	97	97	8	519.768	0.8574-0.8739	23663	1037.52	6.2	A0A8C4LEB1		HCD
M1_2_RB1_1_8832.d	PPPPPP	F1:18048	6	97	97	6	601.335	1.1429-1.1592	0	600.327	1.6	A0A8C4MTS8:A0A8C4LUM8:A0A8C4KXX4:A0A8C4M9E1:A0A8C4M3B4:A0A8C4LMY3:A0A8C4LNL1:A0A8C4LAX9:A0A8C4L5S0:A0A8C4LV13:A0A8C4LX24:A0A8C4LYB5:A0A8C4MZE5:A0A8C4LIZ6:A0A8C4LIA5:A0A8C4MVP1:A0A8C4MF50:A0A8C4MIB0:A0A8C4M7H9:A0A8C4MP75:A0A8C4L1M4:A0A8C4L0M4:A0A8C4MG23:A0A8C4MAY6:A0A8C4LUX7:A0A8C4NB56:A0A8C4MTY2:A0A8C4N2U9:A0A8C4LIL0:A0A8C4LI36:A0A8C4LI35:A0A8C4MLD5:A0A8C4MJU3:A0A8C4MMK2:A0A8C4PSM7:A0A8C4MLT9:A0A…		HCD
M1_RB1_1_8657.d	VEDLPNKKV	F3:27496	9	97	97	9	521.301	0.8767-0.8932	8989.8	1040.59	0.7			HCD
M1_RB1_1_8657.d	M(+42.01)ERAQ(+.98)TLLR	F3:43262	9	97	97	9	580.809	0.9524-0.9689	7925.5	1159.6	1.5		Acetylation (N-term); Deamidation (NQ)	HCD
M1_3_RB1_1_8834.d	DSEKPKKL	F2:4226	8	97	97	8	472.772	0.8235-0.8401	0	943.534	-5.7	A0A8C4LML2		HCD
M1_3_RB1_1_8834.d	EPVKKL	F2:8136	6	97	97	6	357.233	0.7327-0.7494	3534.5	712.448	5.4	A0A8C4MAC7:A0A8C4PQV7:A0A8C4MHP1:A0A8C4MKT7:A0A8C4MCS3		HCD
M1_2_RB1_1_8832.d	KKATLHAVDVT	F1:15546	11	97	97	11	591.849	0.9098-0.9263	2453.4	1181.68	5.9	A0A8C4LSV0		HCD
M1_RB1_1_8657.d	HESTNLSQEKYK	F3:8688	12	97	97	12	732.362	1.0243-1.0407	9424.3	1462.71	3.1	B7VGF9:C1L3G3:A0A8C4MHP1:A0A8C4MKT7:A0A8C4MCS3		HCD
M2-1_2_RB1_1_8837.d	EEVVKKL	F4:11897	7	97	97	7	422.76	0.7647-0.7813	219.23	843.506	-0.1			HCD
M1_RB1_1_8657.d	HESTNLSQEKYK	F3:8693	12	97	97	12	488.577	0.8132-0.8298	24988	1462.71	1.9	B7VGF9:C1L3G3:A0A8C4MHP1:A0A8C4MKT7:A0A8C4MCS3		HCD
M2-1_3_RB1_1_8839.d	LETKEEKLYL	F5:26565	10	97	97	10	633.355	0.9661-0.9826	4439.8	1264.69	3	A0A8C4M7I4		HCD
M1_2_RB1_1_8832.d	LQ(+.98)LTKEEKLYKL	F1:35246	12	97	97	12	502.966	0.8132-0.8298	7028.9	1505.87	3.6	A0A8C4M7I4:A0A8C4LTE2:A0A8C4LBN5	Deamidation (NQ)	HCD
M1_RB1_1_8657.d	VEDLPNKKV	F3:27521	9	97	97	9	521.301	0.8726-0.8891	8989.8	1040.59	0.7			HCD
M1_3_RB1_1_8834.d	DPNHFRPR	F2:8596	8	97	97	8	519.768	0.8574-0.8739	23663	1037.52	6.2	A0A8C4LEB1		HCD
M1_2_RB1_1_8832.d	DKLELTKEEKLY	F1:32362	12	97	97	12	754.918	1.0510-1.0674	665.77	1507.81	5.9	A0A8C4M7I4:A0A8C4LTE2:A0A8C4M6N0:A0A8C4PQ06:A0A8C4M9C8:A0A8C4M5V6:A0A8C4MUK2		HCD
M2-1_RB1_1_8659.d	KHESTNLSQEKY	F6:7441	12	97	97	12	732.36	1.0100-1.0264	2811.8	1462.71	-0.2	B7VGF9:C1L3G3		HCD
M2-1_3_RB1_1_8839.d	LETKEEKLYL	F5:26598	10	97	97	10	633.355	0.9668-0.9833	4439.8	1264.69	3	A0A8C4M7I4		HCD
M1_2_RB1_1_8832.d	PPLKLPK	F1:25058	7	97	97	7	396.771	0.7438-0.7605	2983.8	791.527	0.4	A0A8C4MEG2:A0A8C4LZZ3:A0A8C4MPW1:A0A8C4MUI6		HCD
M2-1_RB1_1_8659.d	DDPVLKKL	F6:21224	8	97	97	8	464.282	0.8028-0.8194	553.76	926.544	6.8	A0A8C4PUS5:A0A8C4MUH2:A0A8C4LIX9		HCD
M1_RB1_1_8657.d	DTVKKL	F3:8709	6	97	97	6	352.222	0.7278-0.7445	2715.5	702.428	3.3	A0A8C4L1V5:A0A8C4L4B8:A0A8C4LYI3:A0A8C4M135:A0A8C4M712		HCD
M1_2_RB1_1_8832.d	PPPPPP	F1:16226	6	97	97	6	601.335	1.1436-1.1599	0	600.327	1.6	A0A8C4MTS8:A0A8C4LUM8:A0A8C4KXX4:A0A8C4M9E1:A0A8C4M3B4:A0A8C4LMY3:A0A8C4LNL1:A0A8C4LAX9:A0A8C4L5S0:A0A8C4LV13:A0A8C4LX24:A0A8C4LYB5:A0A8C4MZE5:A0A8C4LIZ6:A0A8C4LIA5:A0A8C4MVP1:A0A8C4MF50:A0A8C4MIB0:A0A8C4M7H9:A0A8C4MP75:A0A8C4L1M4:A0A8C4L0M4:A0A8C4MG23:A0A8C4MAY6:A0A8C4LUX7:A0A8C4NB56:A0A8C4MTY2:A0A8C4N2U9:A0A8C4LIL0:A0A8C4LI36:A0A8C4LI35:A0A8C4MLD5:A0A8C4MJU3:A0A8C4MMK2:A0A8C4PSM7:A0A8C4MLT9:A0A…		HCD
M1_2_RB1_1_8832.d	EANYLGADKYFHA	F1:39178	13	97	97	13	749.855	1.0189-1.0353	8200.1	1497.69	4.7	A0A8C4LEB1:A0A8C4MGQ5		HCD
M1_3_RB1_1_8834.d	LQ(+.98)LTKEEKLYKL	F2:35185	12	97	97	12	502.965	0.8138-0.8304	6860.9	1505.87	2	A0A8C4M7I4:A0A8C4LTE2:A0A8C4LBN5	Deamidation (NQ)	HCD
M1_3_RB1_1_8834.d	SLTN(+.98)KLELTKEE	F2:34676	12	97	97	12	703.376	1.0100-1.0264	769.89	1404.73	1.8	A0A8C4LTE2:A0A8C4M6N0:A0A8C4PQ06:A0A8C4M9C8:A0A8C4M5V6:A0A8C4MUK2	Deamidation (NQ)	HCD
M2-1_3_RB1_1_8839.d	DEEKNFKA	F5:8030	8	97	97	8	490.739	0.8111-0.8277	1995.3	979.461	2.5			HCD
M1_3_RB1_1_8834.d	M(+42.01)ERAETLLR	F2:43816	9	97	97	9	580.812	0.9407-0.9572	6210.2	1159.6	6.1		Acetylation (N-term)	HCD
M2-1_3_RB1_1_8839.d	HESTNLSQEK	F5:3405	10	97	97	10	586.784	0.8926-0.9091	8242.3	1171.55	6.1	B7VGF9:C1L3G3		HCD
M1_3_RB1_1_8834.d	EANYLGADKYF	F2:44397	11	97	97	11	645.806	0.9345-0.9510	1682.1	1289.59	3.9	A0A8C4LEB1:A0A8C4MGQ5		HCD
M1_2_RB1_1_8832.d	ELEELH	F1:20320	6	97	97	6	769.376	1.2776-1.2938	0	768.365	4			HCD
M1_2_RB1_1_8832.d	TK(+42.01)GPDLLPK	F1:30533	9	97	97	9	505.8	0.8332-0.8498	92142	1009.58	4	A0A8C4LNY7:A0A8C4LWU9:A0A8C4LPU7	Acetylation (K)	HCD
M2-1_2_RB1_1_8837.d	DPNHFRPR	F4:6229	8	97	97	8	519.767	0.8450-0.8615	9561.6	1037.52	4.1	A0A8C4LEB1		HCD
M1_2_RB1_1_8832.d	VEDLKKV	F1:26087	7	97	97	7	415.756	0.7785-0.7952	0	829.491	6.8			HCD
M1_RB1_1_8657.d	WKKATLH	F3:8654	7	97	97	7	442.264	0.7938-0.8104	1438.9	882.508	5.5	A0A8C4LSV0		HCD
M1_3_RB1_1_8834.d	NKKLVKKL	F2:5684	8	97	97	8	485.844	0.8443-0.8608	0	969.67	4.5	A0A8C4L4D1:A0A8C4MMY3:A0A8C4LZT9:A0A8C4KYR6:A0A8C4PFG6:A0A8C4KXU0:A0A8C4N2S5		HCD
M2-1_RB1_1_8659.d	PPPPPP	F6:14155	6	97	97	6	601.332	1.1456-1.1619	0	600.327	-3.5	A0A8C4MTS8:A0A8C4LUM8:A0A8C4KXX4:A0A8C4M9E1:A0A8C4M3B4:A0A8C4LMY3:A0A8C4LNL1:A0A8C4LAX9:A0A8C4L5S0:A0A8C4LV13:A0A8C4LX24:A0A8C4LYB5:A0A8C4MZE5:A0A8C4LIZ6:A0A8C4LIA5:A0A8C4MVP1:A0A8C4MF50:A0A8C4MIB0:A0A8C4M7H9:A0A8C4MP75:A0A8C4L1M4:A0A8C4L0M4:A0A8C4MG23:A0A8C4MAY6:A0A8C4LUX7:A0A8C4NB56:A0A8C4MTY2:A0A8C4N2U9:A0A8C4LIL0:A0A8C4LI36:A0A8C4LI35:A0A8C4MLD5:A0A8C4MJU3:A0A8C4MMK2:A0A8C4PSM7:A0A8C4MLT9:A0A…		HCD
M1_2_RB1_1_8832.d	PPPPP	F1:12468	5	97	97	5	504.284	1.0113-1.0278	0	503.274	4.6			HCD
M1_3_RB1_1_8834.d	LKVNDEDKQKL	F2:9787	11	97	97	11	443.92	0.7633-0.7799	971.18	1328.73	5.7	A0A8C4KYA3		HCD
M1_RB1_1_8657.d	ERFVQDLSK	F3:40718	9	97	97	9	561.302	0.9077-0.9242	2279	1120.59	1.4			HCD
M1_3_RB1_1_8834.d	HESTNLSQEKYK	F2:8795	12	97	97	12	488.578	0.8069-0.8235	21264	1462.71	4.3	B7VGF9:C1L3G3:A0A8C4MHP1:A0A8C4MKT7:A0A8C4MCS3		HCD
M1_2_RB1_1_8832.d	VPQLE	F1:26276	5	97	97	5	585.324	1.1232-1.1395	0	584.317	0.4			HCD
M2-1_2_RB1_1_8837.d	ELTKEEKLYLK	F4:20110	11	97	97	11	697.402	1.0004-1.0168	2330.6	1392.79	2.2	A0A8C4M7I4:A0A8C4LTE2:A0A8C4MQW4:A0A8C4PU43		HCD
M1_RB1_1_8657.d	N(+.98)PVLRKL	F3:25361	7	97	97	7	420.77	0.7979-0.8145	1277.6	839.523	2.2	A0A8C4MK65	Deamidation (NQ)	HCD
M1_3_RB1_1_8834.d	DPATQPLVPVHNPVLN	F2:48098	16	97	97	16	855.968	1.0946-1.1110	50206	1709.91	6.8	D2EC27		HCD
M2-1_RB1_1_8659.d	ELTKEEKLY	F6:18402	9	97	97	9	576.811	0.9180-0.9345	38394	1151.61	-0.2	A0A8C4M7I4:A0A8C4LTE2		HCD
M1_3_RB1_1_8834.d	EKVQKYK	F2:4346	7	97	97	7	461.772	0.8360-0.8526	113.2	921.528	0.3			HCD
M1_3_RB1_1_8834.d	KGNLEYK	F2:7520	7	97	97	7	426.237	0.8076-0.8242	231.62	850.455	5.5			HCD
M1_2_RB1_1_8832.d	DEVRKLLRL	F1:26724	9	97	97	9	381.241	0.7278-0.7445	565.62	1140.7	1.9	A0A8C4LBX7:A0A8C4LML2:A0A8C4LGG5		HCD
M1_RB1_1_8657.d	ADTKELVSSKVS	F3:19643	12	97	97	12	632.344	0.9908-1.0072	1106.4	1262.67	0.8	A0A8C4LD25:A0A8C4PSY6:A0A8C4MMW0		HCD
M2-1_RB1_1_8659.d	HESTNLSQEK	F6:3407	10	97	97	10	586.783	0.8926-0.9091	11585	1171.55	3.8	B7VGF9:C1L3G3		HCD
M2-1_3_RB1_1_8839.d	HESTNLSQEKY	F5:10906	11	97	97	11	668.315	0.9352-0.9517	17017	1334.61	3.2	B7VGF9:C1L3G3		HCD
M1_3_RB1_1_8834.d	TK(+42.01)GPDLLPK	F2:30415	9	97	97	9	505.799	0.8318-0.8484	91243	1009.58	2	A0A8C4LNY7:A0A8C4LWU9:A0A8C4LPU7	Acetylation (K)	HCD
M1_RB1_1_8657.d	ETLLR	F3:17700	5	97	97	5	631.377	1.1897-1.2060	0	630.37	0.2			HCD
M1_3_RB1_1_8834.d	T(+42.01)TLTH	F2:17173	5	97	97	5	614.316	1.1450-1.1613	0	613.307	2.9		Acetylation (N-term)	HCD
M1_RB1_1_8657.d	AEEKKKKKL	F3:1324	9	97	97	9	551.354	0.8760-0.8926	1394.1	1100.69	2.3	A0A8C4LPN9:A0A8C4MD96:A0A8C4MLY4:A0A8C4MMG4:A0A8C4LYI3:A0A8C4M135:A0A8C4M712:A0A8C4MP75:A0A8C4L946:A0A8C4LA58:A0A8C4L2G1:A0A8C4L6W9:A0A8C4MGD3:A0A8C4LRW5:A0A8C4KUB0:A0A8C4PS52:A0A8C4L727:A0A8C4L5Z6:A0A8C4M1Y3:A0A8C4M2V3:A0A8C4M099:A0A8C4M5N7:A0A8C4LZT9:A0A8C4KQK5:A0A8C4PL28:A0A8C4LLN8:A0A8C4LJP8:A0A8C4MQT7:A0A8C4MPM2:A0A8C4MNE2:A0A8C4MD75:A0A8C4PRJ1:A0A8C4MEB5:A0A8C4MCX6:A0A8C4PRX7:A0A8C4PGF3:A0A…		HCD
M1_3_RB1_1_8834.d	LPLTE	F2:32435	5	97	97	5	572.327	1.1341-1.1504	0	571.322	-4			HCD
M1_3_RB1_1_8834.d	DLDDKLLK	F2:26489	8	97	97	8	480.276	0.8443-0.8608	672.92	958.533	3			HCD
M1_2_RB1_1_8832.d	LPDKY	F1:16614	5	97	97	5	635.34	1.1735-1.1897	0	634.333	0.7			HCD
M1_RB1_1_8657.d	SPLPN(+.98)LFPADFK	F3:56131	12	97	97	12	673.854	0.9469-0.9634	21079	1345.69	1.8	A0A8C4LDF2:A0A8C4LHM4:A0A8C4LGD8	Deamidation (NQ)	HCD
M1_3_RB1_1_8834.d	HESTNLSQEKY	F2:13675	11	97	97	11	668.315	0.9448-0.9613	13617	1334.61	4.5	B7VGF9:C1L3G3		HCD
M1_3_RB1_1_8834.d	DEFRKL	F2:19609	6	97	97	6	404.222	0.7612-0.7778	602.71	806.429	1.5			HCD
M2-1_3_RB1_1_8839.d	HESTNLSQEK	F5:3332	10	97	97	10	586.784	0.9008-0.9173	8242.3	1171.55	6.1	B7VGF9:C1L3G3		HCD
M1_RB1_1_8657.d	QEEKKKKKL	F3:1514	9	97	97	9	579.864	0.9125-0.9290	2418.7	1157.71	0.6	A0A8C4LPN9:A0A8C4MD96:A0A8C4MLY4:A0A8C4MMG4:A0A8C4MP75:A0A8C4L946:A0A8C4LA58:A0A8C4L2G1:A0A8C4L6W9:A0A8C4MGD3:A0A8C4LAY0:A0A8C4LRW5:A0A8C4KUB0:A0A8C4PS52:A0A8C4L727:A0A8C4L5Z6:A0A8C4M1Y3:A0A8C4M2V3:A0A8C4M099:A0A8C4M5N7:A0A8C4LZT9:A0A8C4KQK5:A0A8C4PL28:A0A8C4LLN8:A0A8C4LJP8:A0A8C4MQT7:A0A8C4MPM2:A0A8C4MNE2:A0A8C4MD75:A0A8C4PRJ1:A0A8C4MEB5:A0A8C4MCX6:A0A8C4PRX7:A0A8C4PGF3:A0A8C4LZB6:A0A8C4MPW1:A0A…		HCD
M1_2_RB1_1_8832.d	PPPPPP	F1:19000	6	97	97	6	601.335	1.1280-1.1443	0	600.327	1.6	A0A8C4MTS8:A0A8C4LUM8:A0A8C4KXX4:A0A8C4M9E1:A0A8C4M3B4:A0A8C4LMY3:A0A8C4LNL1:A0A8C4LAX9:A0A8C4L5S0:A0A8C4LV13:A0A8C4LX24:A0A8C4LYB5:A0A8C4MZE5:A0A8C4LIZ6:A0A8C4LIA5:A0A8C4MVP1:A0A8C4MF50:A0A8C4MIB0:A0A8C4M7H9:A0A8C4MP75:A0A8C4L1M4:A0A8C4L0M4:A0A8C4MG23:A0A8C4MAY6:A0A8C4LUX7:A0A8C4NB56:A0A8C4MTY2:A0A8C4N2U9:A0A8C4LIL0:A0A8C4LI36:A0A8C4LI35:A0A8C4MLD5:A0A8C4MJU3:A0A8C4MMK2:A0A8C4PSM7:A0A8C4MLT9:A0A…		HCD
M2-1_2_RB1_1_8837.d	KHESTNLSQEKYK	F4:4254	13	97	97	13	531.277	0.8076-0.8242	8607.6	1590.8	5.8	B7VGF9:C1L3G3:A0A8C4MHP1:A0A8C4MKT7:A0A8C4MCS3		HCD
M2-1_2_RB1_1_8837.d	EDGHVKV	F4:6000	7	97	97	7	392.204	0.7369-0.7535	4960.1	782.392	2.7			HCD
M1_2_RB1_1_8832.d	DKDKEKKL	F1:2030	8	97	97	8	502.291	0.8291-0.8457	537.28	1002.57	-3.9	A0A8C4M1L5:A0A8C4PU68:A0A8C4PSE2:A0A8C4MCS9		HCD
M1_3_RB1_1_8834.d	RSKFR	F2:2217	5	97	97	5	347.213	0.7459-0.7626	0	692.408	4			HCD
M1_2_RB1_1_8832.d	RAETLLR	F1:14368	7	97	97	7	429.764	0.7945-0.8111	2008.4	857.508	5			HCD
M1_3_RB1_1_8834.d	ELTKEEKLYLK	F2:25395	11	97	97	11	465.272	0.8000-0.8166	7408.8	1392.79	4.9	A0A8C4M7I4:A0A8C4LTE2:A0A8C4MQW4:A0A8C4PU43		HCD
M1_3_RB1_1_8834.d	LPDLFPADFK	F2:55999	10	97	97	10	581.812	0.8926-0.9091	25961	1161.61	2.4			HCD
M1_3_RB1_1_8834.d	EELLR	F2:20426	5	97	97	5	659.373	1.2141-1.2303	0	658.365	1.3			HCD
M1_RB1_1_8657.d	DQDPLTKT	F3:14634	8	97	97	8	459.233	0.7952-0.8118	2098.2	916.45	0.5	A0A8C4KZN3:A0A8C4L2D4		HCD
M1_3_RB1_1_8834.d	EDGHVKV	F2:8618	7	97	97	7	392.204	0.7438-0.7605	1160.2	782.392	0.4			HCD
M1_RB1_1_8657.d	HESTNLSQEKYK	F3:8748	12	97	97	12	488.577	0.8021-0.8187	24988	1462.71	1.9	B7VGF9:C1L3G3:A0A8C4MHP1:A0A8C4MKT7:A0A8C4MCS3		HCD
M1_RB1_1_8657.d	HQHQTTM(+15.99)DPQSHKVLL	F3:17966	16	97	97	16	639.322	0.9400-0.9565	4593.1	1914.94	3.7	B7VGF9:A0A8C4MBA7	Oxidation (M)	HCD
M1_2_RB1_1_8832.d	SPLPDLFPADFK	F1:57041	12	97	97	12	673.856	0.9860-1.0024	105660	1345.69	4.7	A0A8C4L6A6		HCD
M1_3_RB1_1_8834.d	DPQSHKVL	F2:12342	8	97	97	8	462.253	0.7813-0.7979	1876.7	922.487	3.7	A0A8C4MBA7		HCD
M2-1_RB1_1_8659.d	DLDDKLLK	F6:20412	8	97	97	8	480.273	0.8436-0.8601	1206	958.533	-1.8			HCD
M2-1_RB1_1_8659.d	DAAKKRVKA	F6:2447	9	97	97	9	493.807	0.8567-0.8733	0	985.603	-3.7			HCD
M1_RB1_1_8657.d	PPLKLKP	F3:24941	7	97	97	7	396.771	0.8007-0.8173	605.28	791.527	0.3			HCD
M1_RB1_1_8657.d	M(+42.01)(+15.99)ERAETLLR	F3:30738	9	97	97	9	588.807	0.9524-0.9689	7730.6	1175.6	2.9		Acetylation (N-term); Oxidation (M)	HCD
M2-1_RB1_1_8659.d	DPQSHKVL	F6:9787	8	97	97	8	462.252	0.7868-0.8035	1472.7	922.487	3.5	A0A8C4MBA7		HCD
M2-1_RB1_1_8659.d	EKEELNVSSK	F6:9297	10	97	97	10	581.801	0.8953-0.9118	1763.3	1161.59	-1.1	D2EC27:A0A8C4MZM0		HCD
M1_3_RB1_1_8834.d	KFPLFK	F2:35461	6	97	97	6	390.246	0.7979-0.8145	0	778.474	4.2			HCD
M2-1_RB1_1_8659.d	ELTKEEKLY	F6:18354	9	97	97	9	576.811	0.9160-0.9325	38394	1151.61	-0.2	A0A8C4M7I4:A0A8C4LTE2		HCD
M1_2_RB1_1_8832.d	GAQ(+.98)EKKKKKL	F1:1506	10	97	97	10	579.865	0.9022-0.9187	2820.2	1157.71	1.1	A0A8C4L1V5:A0A8C4L4B8:A0A8C4MD96:A0A8C4LAH0:A0A8C4LQJ7:A0A8C4MZE5:A0A8C4MLY4:A0A8C4MMG4:A0A8C4MP75:A0A8C4L946:A0A8C4LA58:A0A8C4L2G1:A0A8C4L6W9:A0A8C4MGD3:A0A8C4MEI5:A0A8C4MEJ9:A0A8C4M6Y4:A0A8C4M530:A0A8C4MEG2:A0A8C4LRW5:A0A8C4KUB0:A0A8C4PS52:A0A8C4L727:A0A8C4L5Z6:A0A8C4M1Y3:A0A8C4M2V3:A0A8C4M099:A0A8C4M5N7:A0A8C4LZT9:A0A8C4KQK5:A0A8C4PL28:A0A8C4LLN8:A0A8C4LJP8:A0A8C4MQT7:A0A8C4MPM2:A0A8C4MNE2:A0A…	Deamidation (NQ)	HCD
M1_RB1_1_8657.d	K(+42.01)QSGVN(+.98)MTKSVVTS	F3:32474	14	97	97	14	754.888	1.0407-1.0571	416.18	1507.76	4.1		Acetylation (N-term); Deamidation (NQ)	HCD
M1_3_RB1_1_8834.d	DTKQ(+.98)LVSSKVS	F2:20572	11	97	97	11	596.827	0.9208-0.9373	200.06	1191.63	3.5		Deamidation (NQ)	HCD
M1_3_RB1_1_8834.d	LPDKY	F2:16561	5	97	97	5	635.34	1.1735-1.1897	0	634.333	0.7			HCD
M1_2_RB1_1_8832.d	DLDDKLLK	F1:26477	8	97	97	8	480.277	0.8443-0.8608	429.46	958.533	6.4			HCD
M1_2_RB1_1_8832.d	SPLPN(+.98)LFPADFK	F1:57066	12	97	97	12	673.856	0.9661-0.9826	105660	1345.69	4.7	A0A8C4LDF2:A0A8C4LHM4:A0A8C4LGD8	Deamidation (NQ)	HCD
M2-1_RB1_1_8659.d	DPDTAHPHL	F6:14928	9	97	97	9	501.737	0.8643-0.8808	3608.7	1001.46	3.1	A0A8C4LD23		HCD
M1_RB1_1_8657.d	PNHFRPR	F3:5017	7	97	97	7	462.251	0.8173-0.8339	1839.3	922.489	-0.6	A0A8C4LEB1		HCD
M1_RB1_1_8657.d	DPNHFRPR	F3:8523	8	97	97	8	519.767	0.8664-0.8829	23882	1037.52	4.2	A0A8C4LEB1		HCD
M2-1_RB1_1_8659.d	M(+42.01)EAHE	F6:11254	5	97	97	5	658.251	1.1884-1.2046	0	657.243	0.8		Acetylation (N-term)	HCD
M2-1_RB1_1_8659.d	EEKVQKF	F6:8813	7	97	97	7	454.249	0.7889-0.8055	3974.2	906.481	3.1	D2EC27:A0A8C4KT44:A0A8C4MNE2:A0A8C4MD75:A0A8C4PRJ1:A0A8C4MEB5:A0A8C4MCX6:A0A8C4PRX7		HCD
M1_2_RB1_1_8832.d	EKEQ(+.98)LNVSSK	F1:11853	10	97	97	10	581.805	0.8884-0.9050	598.34	1161.59	6.7	A0A8C4PTH7	Deamidation (NQ)	HCD
M1_RB1_1_8657.d	TPKKPKKA	F3:1454	8	97	97	8	449.299	0.7889-0.8055	3452.4	896.581	2.6	A0A8C4L7E5:A0A8C4LD74:A0A8C4PJP9:A0A8C4LGI0:A0A8C4LH82:A0A8C4KWP0:A0A8C4MPW1:A0A8C4MUI6		HCD
M1_RB1_1_8657.d	DPQSHKVL	F3:12316	8	97	97	8	462.25	0.7889-0.8055	2210.8	922.487	-0.8	A0A8C4MBA7		HCD
M2-1_3_RB1_1_8839.d	HESTNLSQEK	F5:3323	10	97	97	10	586.784	0.8926-0.9091	8242.3	1171.55	6.1	B7VGF9:C1L3G3		HCD
M1_3_RB1_1_8834.d	SPLPN(+.98)LFPADFK	F2:57032	12	97	97	12	673.856	0.9860-1.0024	116350	1345.69	4.4	A0A8C4LDF2:A0A8C4LHM4:A0A8C4LGD8	Deamidation (NQ)	HCD
M1_2_RB1_1_8832.d	NHFRPR	F1:3713	6	97	97	6	413.727	0.7834-0.8000	1559.4	825.436	3.6			HCD
M1_3_RB1_1_8834.d	DEVRKLLRL	F2:26718	9	97	97	9	381.241	0.7278-0.7445	414.54	1140.7	3.4	A0A8C4LBX7:A0A8C4LML2:A0A8C4LGG5		HCD
M1_RB1_1_8657.d	DSESAPLRVYLEK	F3:38600	13	97	97	13	753.894	1.0503-1.0667	1938.7	1505.77	0.1	P13613:D6QX32:D6QX31		HCD
M1_RB1_1_8657.d	TK(+42.01)GPDLLPK	F3:30136	9	97	97	9	505.797	0.8408-0.8574	87777	1009.58	-0.8	A0A8C4LNY7:A0A8C4LWU9:A0A8C4LPU7	Acetylation (K)	HCD
M1_2_RB1_1_8832.d	DSESAPLRVYLEK	F1:39190	13	97	97	13	753.896	1.0407-1.0571	2262.8	1505.77	3.5	P13613:D6QX32:D6QX31		HCD
M1_RB1_1_8657.d	HESTNLSQEK	F3:5075	10	97	97	10	586.782	0.8836-0.9001	1753.5	1171.55	2	B7VGF9:C1L3G3		HCD
M1_RB1_1_8657.d	ETLLR	F3:17730	5	97	97	5	631.379	1.1911-1.2073	0	630.37	2.7			HCD
M1_RB1_1_8657.d	T(+42.01)TLTH	F3:16880	5	97	97	5	614.313	1.1572-1.1735	0	613.307	-2.5		Acetylation (N-term)	HCD
M1_2_RB1_1_8832.d	ERAETLLR	F1:18178	8	97	97	8	494.283	0.8608-0.8774	262.89	986.551	1.5			HCD
M1_3_RB1_1_8834.d	PPKLPH	F2:7429	6	97	97	6	344.712	0.7084-0.7251	487.59	687.407	3.1			HCD
M2-1_RB1_1_8659.d	DPLTKT	F6:7154	6	97	97	6	674.369	1.1931-1.2094	0	673.365	-4.1	A0A8C4KZN3:A0A8C4L2D4		HCD
M1_3_RB1_1_8834.d	HESTNLSQEK	F2:5132	10	97	97	10	586.783	0.8774-0.8939	1502.6	1171.55	3.3	B7VGF9:C1L3G3		HCD
M1_3_RB1_1_8834.d	WPELE	F2:47348	5	97	97	5	673.321	1.1999-1.2161	0	672.312	2.3			HCD
M2-1_RB1_1_8659.d	HESTNLSQEK	F6:3372	10	97	97	10	586.783	0.8994-0.9160	11585	1171.55	3.8	B7VGF9:C1L3G3		HCD
M2-1_RB1_1_8659.d	HESTNLSQEKY	F6:10852	11	97	97	11	668.316	0.9428-0.9593	16558	1334.61	4.6	B7VGF9:C1L3G3		HCD
M1_3_RB1_1_8834.d	DELVKKL	F2:22673	7	97	97	7	422.762	0.7771-0.7938	282.03	843.506	2.5	A0A8C4L9Z3:A0A8C4LBK0:A0A8C4LEL1:A0A8C4LGW5:A0A8C4LB42:A0A8C4LJD7:A0A8C4LKU6		HCD
M2-1_2_RB1_1_8837.d	LPDKY	F4:13099	5	97	97	5	635.337	1.1789-1.1952	0	634.333	-5.3			HCD
M1_RB1_1_8657.d	SPLPN(+.98)LFPADFK	F3:56077	12	97	97	12	673.854	0.9750-0.9915	99611	1345.69	1.6	A0A8C4LDF2:A0A8C4LHM4:A0A8C4LGD8	Deamidation (NQ)	HCD
M2-1_RB1_1_8659.d	WPELE	F6:29556	5	96	96	5	673.32	1.2026-1.2188	0	672.312	1.4			HCD
M1_2_RB1_1_8832.d	LELTKEEKLYLK	F1:35278	12	96	96	12	753.946	1.0701-1.0865	1014.5	1505.87	4.6	A0A8C4M7I4:A0A8C4LTE2:A0A8C4M6N0:A0A8C4PQ06:A0A8C4M9C8:A0A8C4M5V6:A0A8C4MQW4:A0A8C4PU43		HCD
M1_3_RB1_1_8834.d	RAETLLR	F2:14293	7	96	96	7	429.763	0.7945-0.8111	1953.4	857.508	3.7			HCD
M1_RB1_1_8657.d	DSPFLK	F3:29886	6	96	96	6	706.38	1.2344-1.2506	0	705.37	4.9			HCD
M1_2_RB1_1_8832.d	HESTNLS(+79.97)QEKYK	F1:10696	12	96	96	12	772.345	1.0339-1.0503	242750	1542.67	2.4	B7VGF9:C1L3G3:A0A8C4MHP1:A0A8C4MKT7:A0A8C4MCS3	Phosphorylation (STY)	HCD
M1_3_RB1_1_8834.d	PPLKLKP	F2:25103	7	96	96	7	396.773	0.7924-0.8090	308.33	791.527	5.1			HCD
M2-1_3_RB1_1_8839.d	ELEKKF	F5:10857	6	96	96	6	397.227	0.7584-0.7751	0	792.438	1.7	A0A8C4MXV1		HCD
M1_2_RB1_1_8832.d	HSDAVSLCVLKPDPSQK	F1:35887	17	96	96	17	608.652	0.9008-0.9173	53539	1822.92	4.3	A0A8C4LXL5:A0A8C4MLW6		HCD
M1_2_RB1_1_8832.d	EANYLGWKYFH	F1:35909	11	96	96	11	714.339	0.9956-1.0120	452.17	1426.67	-2.2			HCD
M2-1_RB1_1_8659.d	ELTKEEKLYLK	F6:19893	11	96	96	11	465.269	0.8000-0.8166	11283	1392.79	-0.3	A0A8C4M7I4:A0A8C4LTE2:A0A8C4MQW4:A0A8C4PU43		HCD
M1_RB1_1_8657.d	ERFVQDLSK	F3:40592	9	96	96	9	561.302	0.9098-0.9263	2279	1120.59	1.4			HCD
M1_2_RB1_1_8832.d	EEKVQKF	F1:11451	7	96	96	7	454.249	0.7855-0.8021	2138.2	906.481	3.3	D2EC27:A0A8C4KT44:A0A8C4MNE2:A0A8C4MD75:A0A8C4PRJ1:A0A8C4MEB5:A0A8C4MCX6:A0A8C4PRX7		HCD
M1_RB1_1_8657.d	EDGHVKV	F3:8562	7	96	96	7	392.204	0.7535-0.7702	946.82	782.392	0.8			HCD
M1_2_RB1_1_8832.d	ERFVQDLSK	F1:41489	9	96	96	9	561.304	0.8974-0.9139	2265.5	1120.59	4.7			HCD
M2-1_2_RB1_1_8837.d	ETLLR	F4:14213	5	96	96	5	631.378	1.1816-1.1979	0	630.37	1.6			HCD
M2-1_RB1_1_8659.d	DEEKNFKA	F6:7999	8	96	96	8	490.739	0.8159-0.8325	2918.2	979.461	3			HCD
M1_3_RB1_1_8834.d	KVM(+15.99)PFLK	F2:23203	7	96	96	7	439.762	0.7952-0.8118	0	877.51	0	D2EC27	Oxidation (M)	HCD
M1_3_RB1_1_8834.d	HESTNLS(+79.97)QEKYK	F2:10661	12	96	96	12	772.344	1.0394-1.0558	251380	1542.67	1.2	B7VGF9:C1L3G3:A0A8C4MHP1:A0A8C4MKT7:A0A8C4MCS3	Phosphorylation (STY)	HCD
M1_RB1_1_8657.d	DDKLLK	F3:10565	6	96	96	6	366.219	0.7508-0.7674	651	730.423	1.1			HCD
M2-1_2_RB1_1_8837.d	M(+42.01)Q(+.98)GAEEKKKKKL	F4:5779	12	96	96	12	487.61	0.7508-0.7674	1089.3	1459.81	1.4	A0A8C4LPN9:A0A8C4MD96:A0A8C4MLY4:A0A8C4MMG4:A0A8C4LYI3:A0A8C4M135:A0A8C4M712:A0A8C4MP75:A0A8C4L946:A0A8C4LA58:A0A8C4L2G1:A0A8C4L6W9:A0A8C4MGD3:A0A8C4LRW5:A0A8C4KUB0:A0A8C4PS52:A0A8C4L727:A0A8C4L5Z6:A0A8C4M1Y3:A0A8C4M2V3:A0A8C4M099:A0A8C4M5N7:A0A8C4LZT9:A0A8C4KQK5:A0A8C4PL28:A0A8C4LLN8:A0A8C4LJP8:A0A8C4MQT7:A0A8C4MPM2:A0A8C4MNE2:A0A8C4MD75:A0A8C4PRJ1:A0A8C4MEB5:A0A8C4MCX6:A0A8C4PRX7:A0A8C4PGF3:A0A…	Acetylation (N-term); Deamidation (NQ)	HCD
M1_RB1_1_8657.d	DDSLLRL	F3:49110	7	96	96	7	416.232	0.7861-0.8028	296.95	830.45	-0.6			HCD
M1_RB1_1_8657.d	LPDLFPADFK	F3:55070	10	96	96	10	581.811	0.9001-0.9167	26906	1161.61	0.9			HCD
M2-1_RB1_1_8659.d	WPELE	F6:29585	5	96	96	5	673.319	1.1999-1.2161	0	672.312	0.4			HCD
M1_3_RB1_1_8834.d	QLEKEHH	F2:1680	7	96	96	7	460.736	0.8145-0.8311	0	919.451	6.3			HCD
M1_2_RB1_1_8832.d	HQTTMDPQSHKVLL	F1:28015	14	96	96	14	545.618	0.8208-0.8374	3586.4	1633.82	4.2	B7VGF9:A0A8C4MBA7		HCD
M1_3_RB1_1_8834.d	KLELTKEE	F2:16179	8	96	96	8	495.28	0.8235-0.8401	395.22	988.544	0.8	A0A8C4LTE2:A0A8C4M6N0:A0A8C4PQ06:A0A8C4M9C8:A0A8C4M5V6:A0A8C4MUK2		HCD
M1_2_RB1_1_8832.d	DTVKKL	F1:8795	6	96	96	6	352.223	0.7202-0.7369	2586.2	702.428	5.6	A0A8C4L1V5:A0A8C4L4B8:A0A8C4LYI3:A0A8C4M135:A0A8C4M712		HCD
M1_3_RB1_1_8834.d	EDGPKFL	F2:38296	7	96	96	7	403.209	0.7383-0.7549	1110.5	804.402	1.7	A0A8C4L5X9		HCD
M1_2_RB1_1_8832.d	QHATKGSHVKV	F1:3496	11	96	96	11	596.334	0.9201-0.9366	423.99	1190.65	0.9			HCD
M1_RB1_1_8657.d	HSDAVSLCVLKPDPSQK	F3:35366	17	96	96	17	608.649	0.9111-0.9277	52256	1822.92	0.9	A0A8C4LXL5:A0A8C4MLW6		HCD
M1_2_RB1_1_8832.d	TK(+42.01)GPDLLPK	F1:30309	9	96	96	9	505.8	0.8318-0.8484	92142	1009.58	4	A0A8C4LNY7:A0A8C4LWU9:A0A8C4LPU7	Acetylation (K)	HCD
M1_2_RB1_1_8832.d	QEEKKKKKL	F1:1473	9	96	96	9	579.865	0.9029-0.9194	2820.2	1157.71	1.1	A0A8C4LPN9:A0A8C4MD96:A0A8C4MLY4:A0A8C4MMG4:A0A8C4MP75:A0A8C4L946:A0A8C4LA58:A0A8C4L2G1:A0A8C4L6W9:A0A8C4MGD3:A0A8C4LAY0:A0A8C4LRW5:A0A8C4KUB0:A0A8C4PS52:A0A8C4L727:A0A8C4L5Z6:A0A8C4M1Y3:A0A8C4M2V3:A0A8C4M099:A0A8C4M5N7:A0A8C4LZT9:A0A8C4KQK5:A0A8C4PL28:A0A8C4LLN8:A0A8C4LJP8:A0A8C4MQT7:A0A8C4MPM2:A0A8C4MNE2:A0A8C4MD75:A0A8C4PRJ1:A0A8C4MEB5:A0A8C4MCX6:A0A8C4PRX7:A0A8C4PGF3:A0A8C4LZB6:A0A8C4MPW1:A0A…		HCD
M1_3_RB1_1_8834.d	ELLKRT	F2:10330	6	96	96	6	380.24	0.7626-0.7792	0	758.465	0.9	A0A8C4PTH7		HCD
M1_3_RB1_1_8834.d	PPLKLPK	F2:24942	7	96	96	7	396.772	0.7431-0.7598	2963.3	791.527	3.8	A0A8C4MEG2:A0A8C4LZZ3:A0A8C4MPW1:A0A8C4MUI6		HCD
M1_2_RB1_1_8832.d	LDVKKL	F1:10756	6	96	96	6	358.241	0.7230-0.7397	0	714.464	4.5			HCD
M1_RB1_1_8657.d	HSWVSLTTTKPDPSQK	F3:36803	16	96	96	16	604.648	0.9118-0.9283	13128	1810.92	1	A0A8C4LXL5		HCD
M1_RB1_1_8657.d	HESTNLSQEKYK	F3:8768	12	96	96	12	488.577	0.8166-0.8332	24988	1462.71	1.9	B7VGF9:C1L3G3:A0A8C4MHP1:A0A8C4MKT7:A0A8C4MCS3		HCD
M1_3_RB1_1_8834.d	SPLPN(+.98)LFPADFK	F2:57067	12	96	96	12	673.856	0.9682-0.9846	116350	1345.69	4.4	A0A8C4LDF2:A0A8C4LHM4:A0A8C4LGD8	Deamidation (NQ)	HCD
M1_RB1_1_8657.d	LQ(+.98)LTKEEKLYKL	F3:34709	12	96	96	12	502.963	0.8194-0.8360	7004.5	1505.87	-2.2	A0A8C4M7I4:A0A8C4LTE2:A0A8C4LBN5	Deamidation (NQ)	HCD
M1_3_RB1_1_8834.d	SPFLLKT	F2:41696	7	96	96	7	403.245	0.7501-0.7667	0	804.475	0.9	A0A8C4MKR0:A0A8C4MME7		HCD
M2-1_RB1_1_8659.d	PPPPPP	F6:12821	6	96	96	6	601.332	1.1531-1.1694	0	600.327	-3.5	A0A8C4MTS8:A0A8C4LUM8:A0A8C4KXX4:A0A8C4M9E1:A0A8C4M3B4:A0A8C4LMY3:A0A8C4LNL1:A0A8C4LAX9:A0A8C4L5S0:A0A8C4LV13:A0A8C4LX24:A0A8C4LYB5:A0A8C4MZE5:A0A8C4LIZ6:A0A8C4LIA5:A0A8C4MVP1:A0A8C4MF50:A0A8C4MIB0:A0A8C4M7H9:A0A8C4MP75:A0A8C4L1M4:A0A8C4L0M4:A0A8C4MG23:A0A8C4MAY6:A0A8C4LUX7:A0A8C4NB56:A0A8C4MTY2:A0A8C4N2U9:A0A8C4LIL0:A0A8C4LI36:A0A8C4LI35:A0A8C4MLD5:A0A8C4MJU3:A0A8C4MMK2:A0A8C4PSM7:A0A8C4MLT9:A0A…		HCD
M1_3_RB1_1_8834.d	SPLPN(+.98)LFPADFK	F2:57020	12	96	96	12	673.856	0.9846-1.0011	116350	1345.69	4.4	A0A8C4LDF2:A0A8C4LHM4:A0A8C4LGD8	Deamidation (NQ)	HCD
M1_RB1_1_8657.d	PPLKLP	F3:39420	6	96	96	6	332.724	0.7549-0.7716	2905.7	663.432	1.3	A0A8C4MEG2:A0A8C4LZZ3:A0A8C4MPW1:A0A8C4MUI6		HCD
M1_2_RB1_1_8832.d	KHESTNLSQEKYK	F1:6785	13	96	96	13	531.277	0.8090-0.8256	5076.6	1590.8	5.1	B7VGF9:C1L3G3:A0A8C4MHP1:A0A8C4MKT7:A0A8C4MCS3		HCD
M1_2_RB1_1_8832.d	DPLTKT	F1:9873	6	96	96	6	674.375	1.1809-1.1972	0	673.365	4.2	A0A8C4KZN3:A0A8C4L2D4		HCD
M1_3_RB1_1_8834.d	LELTKEEKLYLK	F2:35179	12	96	96	12	753.947	1.0681-1.0844	964.56	1505.87	5.4	A0A8C4M7I4:A0A8C4LTE2:A0A8C4M6N0:A0A8C4PQ06:A0A8C4M9C8:A0A8C4M5V6:A0A8C4MQW4:A0A8C4PU43		HCD
M1_2_RB1_1_8832.d	DPQSHKVL	F1:12432	8	96	96	8	462.253	0.7799-0.7965	2123.8	922.487	4	A0A8C4MBA7		HCD
M1_3_RB1_1_8834.d	DDSLLRL	F2:49670	7	96	96	7	416.233	0.7730-0.7896	505.5	830.45	3.1			HCD
M1_RB1_1_8657.d	ELPKKTV	F3:9474	7	96	96	7	407.757	0.7799-0.7965	6307.6	813.496	3.4	B7VGF9		HCD
M1_RB1_1_8657.d	KKATLH	F3:1385	6	96	96	6	349.222	0.7230-0.7397	653.97	696.428	2.2	A0A8C4LSV0		HCD
M1_RB1_1_8657.d	LQ(+.98)LTKEEKLYKL	F3:34738	12	96	96	12	502.963	0.8125-0.8291	7004.5	1505.87	-2.2	A0A8C4M7I4:A0A8C4LTE2:A0A8C4LBN5	Deamidation (NQ)	HCD
M2-1_3_RB1_1_8839.d	EEKVQKF	F5:8877	7	96	96	7	454.249	0.7820-0.7986	4051.4	906.481	2.3	D2EC27:A0A8C4KT44:A0A8C4MNE2:A0A8C4MD75:A0A8C4PRJ1:A0A8C4MEB5:A0A8C4MCX6:A0A8C4PRX7		HCD
M1_RB1_1_8657.d	WPELE	F3:46747	5	96	96	5	673.319	1.2114-1.2276	0	672.312	0.4			HCD
M1_2_RB1_1_8832.d	PNHFRPR	F1:5021	7	96	96	7	462.254	0.8090-0.8256	2323.7	922.489	5.5	A0A8C4LEB1		HCD
M1_2_RB1_1_8832.d	EDGPKFL	F1:38258	7	96	96	7	403.208	0.7383-0.7549	1189.7	804.402	-1	A0A8C4L5X9		HCD
M1_RB1_1_8657.d	PNHFRPR	F3:4967	7	96	96	7	462.251	0.8194-0.8360	1839.3	922.489	-0.6	A0A8C4LEB1		HCD
M1_3_RB1_1_8834.d	MPFLK	F2:38461	5	96	96	5	318.184	0.7251-0.7417	20461	634.351	4.2			HCD
M1_3_RB1_1_8834.d	EKVEKFK	F2:5672	7	96	96	7	454.267	0.8104-0.8270	796.15	906.517	1.5			HCD
M1_2_RB1_1_8832.d	TPKKPK	F1:1440	6	96	96	6	349.732	0.7549-0.7716	1857.8	697.449	1.2	A0A8C4MPW1:A0A8C4MUI6		HCD
M2-1_2_RB1_1_8837.d	EPVKKL	F4:5497	6	96	96	6	357.234	0.7369-0.7535	6009	712.448	6.9	A0A8C4MAC7:A0A8C4PQV7:A0A8C4MHP1:A0A8C4MKT7:A0A8C4MCS3		HCD
M2-1_2_RB1_1_8837.d	DEEKNFKA	F4:7880	8	96	96	8	490.738	0.8104-0.8270	3040.7	979.461	1.5			HCD
M2-1_2_RB1_1_8837.d	HESTNLSQEKY	F4:10802	11	96	96	11	668.315	0.9338-0.9503	16876	1334.61	3.4	B7VGF9:C1L3G3		HCD
M2-1_2_RB1_1_8837.d	KHESTNLSQEKYK	F4:4240	13	96	96	13	531.277	0.8076-0.8242	8607.6	1590.8	5.8	B7VGF9:C1L3G3:A0A8C4MHP1:A0A8C4MKT7:A0A8C4MCS3		HCD
M1_RB1_1_8657.d	DLDDKLLK	F3:26306	8	96	96	8	480.275	0.8560-0.8726	481.43	958.533	1.6			HCD
M1_2_RB1_1_8832.d	SVRLED	F1:15351	6	96	96	6	359.692	0.7202-0.7369	1005.7	717.366	4	A0A8C4LD23		HCD
M1_RB1_1_8657.d	RVLEDRA	F3:11148	7	96	96	7	429.745	0.8049-0.8215	1191.6	857.472	3			HCD
M1_2_RB1_1_8832.d	EPVKKL	F1:8143	6	96	96	6	357.233	0.7334-0.7501	3305.9	712.448	4.7	A0A8C4MAC7:A0A8C4PQV7:A0A8C4MHP1:A0A8C4MKT7:A0A8C4MCS3		HCD
M1_3_RB1_1_8834.d	EEKVQKF	F2:11429	7	96	96	7	454.25	0.7855-0.8021	2149.6	906.481	4.8	D2EC27:A0A8C4KT44:A0A8C4MNE2:A0A8C4MD75:A0A8C4PRJ1:A0A8C4MEB5:A0A8C4MCX6:A0A8C4PRX7		HCD
M1_RB1_1_8657.d	APWPEL	F3:53096	6	96	96	6	712.363	1.2614-1.2776	0	711.359	-4.7	A0A8C4LHK7		HCD
M1_2_RB1_1_8832.d	DKYHF	F1:11351	5	96	96	5	355.171	0.7431-0.7598	2151.6	708.323	5			HCD
M2-1_RB1_1_8659.d	EQQ(+.98)GEQMAERY	F6:15279	11	96	96	11	685.29	0.9496-0.9661	3918.9	1368.56	2.4	A0A8C4LD23	Deamidation (NQ)	HCD
M1_RB1_1_8657.d	LPDKY	F3:16387	5	96	96	5	635.337	1.1836-1.1999	0	634.333	-4.4			HCD
M1_2_RB1_1_8832.d	LPDLFPADFK	F1:56086	10	96	96	10	581.813	0.8912-0.9077	25117	1161.61	3.8			HCD
M1_3_RB1_1_8834.d	HLPLP	F2:34532	5	96	96	5	576.35	1.1511-1.1674	0	575.343	-0.8			HCD
M1_2_RB1_1_8832.d	WPELE	F1:47617	5	96	96	5	673.322	1.1999-1.2161	0	672.312	4.1			HCD
M1_2_RB1_1_8832.d	KVVQD	F1:3354	5	96	96	5	588.338	1.1151-1.1314	0	587.328	4.3			HCD
M1_2_RB1_1_8832.d	SPFLLKT	F1:41960	7	96	96	7	403.246	0.7501-0.7667	0	804.475	4.4	A0A8C4MKR0:A0A8C4MME7		HCD
M1_RB1_1_8657.d	KPKLAKPK	F3:3216	8	96	96	8	455.316	0.8381-0.8546	250.72	908.617	0.8			HCD
M1_RB1_1_8657.d	EPPYS	F3:12695	5	96	96	5	592.261	1.0837-1.1001	0	591.254	0.4			HCD
M1_RB1_1_8657.d	LGADKYF	F3:33639	7	96	96	7	407.209	0.7737-0.7903	3995.1	812.407	-3.4	A0A8C4LEB1		HCD
M1_3_RB1_1_8834.d	AENYLGADKYFHA	F2:39060	13	96	96	13	749.856	1.0209-1.0373	7409.9	1497.69	5.2	A0A8C4LEB1:A0A8C4MGQ5		HCD
M1_2_RB1_1_8832.d	M(+42.01)LKLF	F1:59146	5	96	96	5	693.403	1.2823-1.2985	0	692.393	3.9		Acetylation (N-term)	HCD
M1_RB1_1_8657.d	ELEKKF	F3:13570	6	96	96	6	397.226	0.7577-0.7744	0	792.438	0	A0A8C4MXV1		HCD
M1_2_RB1_1_8832.d	SLTDKLELTKEEK	F1:28826	13	96	96	13	511.953	0.8090-0.8256	1455.2	1532.83	5.6	A0A8C4LTE2:A0A8C4M6N0:A0A8C4PQ06:A0A8C4M9C8:A0A8C4M5V6:A0A8C4MUK2		HCD
M2-1_3_RB1_1_8839.d	DDKLLK	F5:8073	6	96	96	6	366.219	0.7431-0.7598	1830.5	730.423	2.8			HCD
M1_2_RB1_1_8832.d	NPGLHLLL	F1:54347	8	96	96	8	438.769	0.8111-0.8277	913.3	875.523	0.3	A0A8C4LW79:A0A8C4LTV0		HCD
M1_3_RB1_1_8834.d	EANYLGADKYFHA	F2:39213	13	96	96	13	749.856	1.0168-1.0332	7409.9	1497.69	5.2	A0A8C4LEB1:A0A8C4MGQ5		HCD
M2-1_3_RB1_1_8839.d	HESTNLSQEKYK	F5:6268	12	96	96	12	732.361	1.0107-1.0271	11020	1462.71	2.2	B7VGF9:C1L3G3:A0A8C4MHP1:A0A8C4MKT7:A0A8C4MCS3		HCD
M1_3_RB1_1_8834.d	SPLPDLFPADFK	F2:57091	12	96	96	12	673.855	0.9352-0.9517	16693	1345.69	3.3	A0A8C4L6A6		HCD
M2-1_3_RB1_1_8839.d	M(+42.01)EVKPPP	F5:26671	7	96	96	7	839.432	1.2810-1.2971	0	838.426	-0.9	A0A8C4PVE1	Acetylation (N-term)	HCD
M2-1_2_RB1_1_8837.d	DRLEE	F4:4486	5	96	96	5	661.317	1.1721-1.1884	0	660.308	3.2			HCD
M1_RB1_1_8657.d	EDGHVKV	F3:8540	7	96	96	7	392.204	0.7522-0.7688	946.82	782.392	0.8			HCD
M1_3_RB1_1_8834.d	DGSKLKL	F2:21665	7	96	96	7	380.733	0.7549-0.7716	0	759.449	3.3	A0A8C4PKP7		HCD
M1_2_RB1_1_8832.d	LPDKY	F1:16278	5	96	96	5	635.341	1.1945-1.2107	0	634.333	2.2			HCD
M1_3_RB1_1_8834.d	KLLPTQ	F2:22921	6	96	96	6	699.441	1.2513-1.2675	0	698.433	1.4	A0A8C4LD23:A0A8C4ML69:A0A8C4PQX9:A0A8C4MA26:A0A8C4MDS9		HCD
M1_RB1_1_8657.d	HESTNLSQEK	F3:5104	10	96	96	10	586.782	0.8822-0.8988	1753.5	1171.55	2	B7VGF9:C1L3G3		HCD
M2-1_RB1_1_8659.d	VEDLKKV	F6:20216	7	96	96	7	415.754	0.7681-0.7848	427.82	829.491	2.2			HCD
M1_RB1_1_8657.d	WPELE	F3:46660	5	96	96	5	673.318	1.2114-1.2276	0	672.312	-1			HCD
M1_RB1_1_8657.d	PPPPPPP	F3:19365	7	96	96	7	698.382	1.2019-1.2182	0	697.38	-6.8	A0A8C4MTS8:A0A8C4LUM8:A0A8C4KXX4:A0A8C4M9E1:A0A8C4M3B4:A0A8C4LMY3:A0A8C4LNL1:A0A8C4LAX9:A0A8C4L5S0:A0A8C4LV13:A0A8C4LX24:A0A8C4LYB5:A0A8C4MZE5:A0A8C4LIZ6:A0A8C4LIA5:A0A8C4MVP1:A0A8C4MF50:A0A8C4MIB0:A0A8C4M7H9:A0A8C4MP75:A0A8C4L1M4:A0A8C4L0M4:A0A8C4MG23:A0A8C4MAY6:A0A8C4LUX7:A0A8C4NB56:A0A8C4MTY2:A0A8C4N2U9:A0A8C4LIL0:A0A8C4LI36:A0A8C4LI35:A0A8C4MLD5:A0A8C4MJU3:A0A8C4MMK2:A0A8C4PSM7:A0A8C4MLT9:A0A…		HCD
M2-1_2_RB1_1_8837.d	PPPPPP	F4:13100	6	96	96	6	601.335	1.1511-1.1674	0	600.327	1.8	A0A8C4MTS8:A0A8C4LUM8:A0A8C4KXX4:A0A8C4M9E1:A0A8C4M3B4:A0A8C4LMY3:A0A8C4LNL1:A0A8C4LAX9:A0A8C4L5S0:A0A8C4LV13:A0A8C4LX24:A0A8C4LYB5:A0A8C4MZE5:A0A8C4LIZ6:A0A8C4LIA5:A0A8C4MVP1:A0A8C4MF50:A0A8C4MIB0:A0A8C4M7H9:A0A8C4MP75:A0A8C4L1M4:A0A8C4L0M4:A0A8C4MG23:A0A8C4MAY6:A0A8C4LUX7:A0A8C4NB56:A0A8C4MTY2:A0A8C4N2U9:A0A8C4LIL0:A0A8C4LI36:A0A8C4LI35:A0A8C4MLD5:A0A8C4MJU3:A0A8C4MMK2:A0A8C4PSM7:A0A8C4MLT9:A0A…		HCD
M2-1_3_RB1_1_8839.d	EELKKL	F5:9727	6	96	96	6	380.234	0.7334-0.7501	448.38	758.454	0	A0A8C4N038:A0A8C4MYZ5:A0A8C4MWY8:A0A8C4N6K9:A0A8C4LTK2:A0A8C4LSJ3:A0A8C4LU33:A0A8C4KV50:A0A8C4MJ46:A0A8C4MJ21:A0A8C4PSI7:A0A8C4MJG8:A0A8C4PSI4		HCD
M1_3_RB1_1_8834.d	APPPPPPP	F2:23285	8	96	96	8	769.421	1.2621-1.2783	0	768.417	-4.5	A0A8C4MTS8:A0A8C4LUM8:A0A8C4KXX4:A0A8C4M9E1:A0A8C4M3B4:A0A8C4LMY3:A0A8C4LNL1:A0A8C4LAX9:A0A8C4MD96:A0A8C4L5S0:A0A8C4LV13:A0A8C4LX24:A0A8C4LYB5:A0A8C4MZE5:A0A8C4LIZ6:A0A8C4LIA5:A0A8C4MVP1:A0A8C4MF50:A0A8C4MIB0:A0A8C4M7H9:A0A8C4MP75:A0A8C4L1M4:A0A8C4L0M4:A0A8C4MG23:A0A8C4MAY6:A0A8C4LUX7:A0A8C4NB56:A0A8C4MTY2:A0A8C4N2U9:A0A8C4LIL0:A0A8C4LI36:A0A8C4LI35:A0A8C4MLD5:A0A8C4MJU3:A0A8C4MMK2:A0A8C4PSM7:A0A…		HCD
M1_3_RB1_1_8834.d	GPPTKKL	F2:6987	7	96	96	7	370.737	0.7313-0.7480	1680.8	739.459	1.5	A0A8C4L8E3		HCD
M1_RB1_1_8657.d	LDQNQQ(+.98)QPTEQ	F3:9730	11	96	96	11	665.296	0.9146-0.9311	2188.4	1328.58	-5.1	A0A8C4LSJ3:A0A8C4LU33:A0A8C4MQW4:A0A8C4PU43:A0A8C4LD35	Deamidation (NQ)	HCD
M1_3_RB1_1_8834.d	HESTNLS(+79.97)QEKYK	F2:10600	12	96	96	12	772.344	1.0373-1.0537	251380	1542.67	1.2	B7VGF9:C1L3G3:A0A8C4MHP1:A0A8C4MKT7:A0A8C4MCS3	Phosphorylation (STY)	HCD
M1_RB1_1_8657.d	KPEFDR	F3:6514	6	96	96	6	396.207	0.7494-0.7660	290.87	790.397	3.1			HCD
M1_2_RB1_1_8832.d	SLSSKLR	F1:11477	7	96	96	7	395.745	0.7757-0.7924	5007.1	789.471	6.5	A0A8C4MSR3:A0A8C4N8C5:A0A8C4LSJ3:A0A8C4LU33		HCD
M2-1_2_RB1_1_8837.d	EEERPPL	F4:18349	7	96	96	7	435.222	0.8477-0.8643	250.11	868.429	0	A0A8C4LAH0		HCD
M2-1_3_RB1_1_8839.d	KHESTNLSQEKY	F5:7520	12	96	96	12	732.363	1.0018-1.0182	2507.5	1462.71	3.8	B7VGF9:C1L3G3		HCD
M1_RB1_1_8657.d	VPVH	F3:4190	4	96	96	4	451.268	0.9874-1.0038	0	450.259	3.4			HCD
M1_RB1_1_8657.d	HESTNLS(+79.97)QEKYK	F3:10547	12	96	96	12	772.343	1.0455-1.0619	241450	1542.67	0.1	B7VGF9:C1L3G3:A0A8C4MHP1:A0A8C4MKT7:A0A8C4MCS3	Phosphorylation (STY)	HCD
M1_2_RB1_1_8832.d	EEKHHLK	F1:1373	7	96	96	7	460.752	0.7806-0.7972	72.506	919.487	3.2	B7VGF9		HCD
M2-1_3_RB1_1_8839.d	DN(+.98)GLSAAARKQ	F5:9028	11	96	96	11	566.294	0.8891-0.9056	2142	1130.57	5.4	A0A8C4MP75:A0A8C4LZI7:A0A8C4LSX9:A0A8C4LQG6:A0A8C4LSB3:A0A8C4LRV3	Deamidation (NQ)	HCD
M1_RB1_1_8657.d	DPNHFRPR	F3:8559	8	96	96	8	519.767	0.8629-0.8795	23882	1037.52	4.2	A0A8C4LEB1		HCD
M2-1_3_RB1_1_8839.d	ELTKEE	F5:3913	6	96	96	6	748.372	1.2567-1.2729	0	747.365	-0.1	A0A8C4LTE2		HCD
M2-1_2_RB1_1_8837.d	K(+42.01)DRLEE	F4:17173	6	96	96	6	416.214	0.7647-0.7813	2954.5	830.413	-1.2		Acetylation (K)	HCD
M1_2_RB1_1_8832.d	HPELLQ	F1:20113	6	96	96	6	736.4	1.2621-1.2783	0	735.391	1.9	P86272:C3W972:A0A8C4PJH0		HCD
M1_2_RB1_1_8832.d	DSPFLK	F1:30178	6	96	96	6	706.38	1.2229-1.2391	0	705.37	4.7			HCD
M1_RB1_1_8657.d	KVVQD	F3:3248	5	96	96	5	588.335	1.1253-1.1416	0	587.328	-0.9			HCD
M1_2_RB1_1_8832.d	PPLKLKP	F1:25038	7	96	96	7	396.772	0.7931-0.8097	432.88	791.527	3.3			HCD
M2-1_2_RB1_1_8837.d	LQ(+.98)LTKEEKLYKL	F4:25492	12	96	96	12	502.967	0.8090-0.8256	788.94	1505.87	6.1	A0A8C4M7I4:A0A8C4LTE2:A0A8C4LBN5	Deamidation (NQ)	HCD
M1_3_RB1_1_8834.d	ELEELH	F2:20322	6	96	96	6	769.374	1.2776-1.2938	0	768.365	2.1			HCD
M1_3_RB1_1_8834.d	SPVKTL	F2:16422	6	96	96	6	644.398	1.1863-1.2026	0	643.39	-0.4			HCD
M2-1_RB1_1_8659.d	KHESTNLSQEKY	F6:7529	12	96	96	12	732.36	1.0100-1.0264	2811.8	1462.71	-0.2	B7VGF9:C1L3G3		HCD
M1_RB1_1_8657.d	APARPPPGGPGASAPLPR	F3:24758	18	96	96	18	555.979	0.8739-0.8905	73572	1664.91	3.4	A0A8C4N5V1:A0A8C4N1C2:A0A8C4PJ30:A0A8C4M4P4:A0A8C4N8C5:A0A8C4LUX7:A0A8C4M1X1:A0A8C4LF53:A0A8C4LF38:A0A8C4LBJ9:A0A8C4LGH9:A0A8C4L2K7:A0A8C4PQY9		HCD
M1_RB1_1_8657.d	DEFRKL	F3:19377	6	96	96	6	404.221	0.7681-0.7848	565.65	806.429	-2.2			HCD
M1_3_RB1_1_8834.d	ERFVQDLSK	F2:41207	9	96	96	9	561.302	0.9001-0.9167	2253.8	1120.59	2.2			HCD
M1_RB1_1_8657.d	EDGPKFL	F3:37763	7	96	96	7	403.206	0.7473-0.7640	1040.6	804.402	-5.6	A0A8C4L5X9		HCD
M2-1_2_RB1_1_8837.d	LLEELK	F4:23806	6	96	96	6	744.445	1.2789-1.2951	0	743.443	-6.9	A0A8C4PJR0:A0A8C4KUH1:A0A8C4KVX9		HCD
M1_2_RB1_1_8832.d	LPLSPM(+15.99)	F1:31648	6	96	96	6	673.359	1.2330-1.2493	0	672.352	0.2	A0A8C4LD23	Oxidation (M)	HCD
M1_2_RB1_1_8832.d	KVVQD	F1:3307	5	96	96	5	588.337	1.1130-1.1293	0	587.328	3.9			HCD
M2-1_RB1_1_8659.d	M(+42.01)DQ(+.98)EDKAFKQ	F6:21746	10	96	96	10	641.786	0.9620-0.9785	367.6	1281.55	2.6		Acetylation (N-term); Deamidation (NQ)	HCD
M1_RB1_1_8657.d	N(+42.01)PPKAPSKKE	F3:7472	10	96	96	10	569.318	0.8712-0.8877	2479.5	1136.62	2.3	A0A8C4M2F8:A0A8C4PP55:A0A8C4M526:A0A8C4PSX3	Acetylation (N-term)	HCD
M2-1_RB1_1_8659.d	LPDKY	F6:13298	5	96	96	5	635.337	1.2134-1.2297	0	634.333	-4.3			HCD
M1_RB1_1_8657.d	EN(+.98)YKKKL	F3:8254	7	96	96	7	462.265	0.8159-0.8325	0	922.512	2.8		Deamidation (NQ)	HCD
M2-1_RB1_1_8659.d	DAQDKLY	F6:16375	7	96	96	7	426.709	0.7695-0.7861	37974	851.403	1.6	A0A8C4MSR3:A0A8C4M4P4		HCD
M1_RB1_1_8657.d	TPKKPK	F3:1361	6	96	96	6	349.73	0.7612-0.7778	1419.8	697.449	-4.3	A0A8C4MPW1:A0A8C4MUI6		HCD
M1_RB1_1_8657.d	AEEKKKKKL	F3:1342	9	95	95	9	551.354	0.8781-0.8946	1394.1	1100.69	2.3	A0A8C4LPN9:A0A8C4MD96:A0A8C4MLY4:A0A8C4MMG4:A0A8C4LYI3:A0A8C4M135:A0A8C4M712:A0A8C4MP75:A0A8C4L946:A0A8C4LA58:A0A8C4L2G1:A0A8C4L6W9:A0A8C4MGD3:A0A8C4LRW5:A0A8C4KUB0:A0A8C4PS52:A0A8C4L727:A0A8C4L5Z6:A0A8C4M1Y3:A0A8C4M2V3:A0A8C4M099:A0A8C4M5N7:A0A8C4LZT9:A0A8C4KQK5:A0A8C4PL28:A0A8C4LLN8:A0A8C4LJP8:A0A8C4MQT7:A0A8C4MPM2:A0A8C4MNE2:A0A8C4MD75:A0A8C4PRJ1:A0A8C4MEB5:A0A8C4MCX6:A0A8C4PRX7:A0A8C4PGF3:A0A…		HCD
M2-1_2_RB1_1_8837.d	LPDKY	F4:12766	5	95	95	5	318.175	0.7049-0.7216	61792	634.333	4.1			HCD
M1_2_RB1_1_8832.d	DALKKKL	F1:8109	7	95	95	7	408.273	0.7848-0.8014	0	814.528	4.5	A0A8C4M2L2:A0A8C4LZ68:A0A8C4L9L1:A0A8C4L4M7:A0A8C4MGK0:A0A8C4M8S2:A0A8C4MCI0:A0A8C4PQM9:A0A8C4LTK2:A0A8C4LCU6:A0A8C4M524:A0A8C4LLG0		HCD
M2-1_RB1_1_8659.d	DSEKATKV	F6:2262	8	95	95	8	439.235	0.7730-0.7896	515.8	876.455	-0.5	A0A8C4N5V1:A0A8C4N1C2		HCD
M1_RB1_1_8657.d	KGNLEYK	F3:7387	7	95	95	7	426.233	0.8152-0.8318	0	850.455	-3.2			HCD
M2-1_3_RB1_1_8839.d	DDERKL	F5:4170	6	95	95	6	388.202	0.7424-0.7591	11470	774.387	4.3	A0A8C4MKZ0		HCD
M2-1_RB1_1_8659.d	DGN(+.98)KPVRM	F6:9268	8	95	95	8	459.23	0.7861-0.8028	16366	916.444	2		Deamidation (NQ)	HCD
M1_3_RB1_1_8834.d	DPLTKT	F2:9840	6	95	95	6	674.375	1.1823-1.1985	0	673.365	5.1	A0A8C4KZN3:A0A8C4L2D4		HCD
M1_3_RB1_1_8834.d	HATKGSHVKV	F2:2806	10	95	95	10	532.307	0.8650-0.8815	0	1062.59	4.8			HCD
M1_RB1_1_8657.d	PPLKLKP	F3:24798	7	95	95	7	396.771	0.7501-0.7667	2669.6	791.527	-0.2			HCD
M1_RB1_1_8657.d	DPATQPLVVPHNPVLN	F3:47439	16	95	95	16	855.966	1.1334-1.1497	54307	1709.91	4.8	D2EC27		HCD
M2-1_2_RB1_1_8837.d	EEKVQKF	F4:8802	7	95	95	7	454.249	0.7820-0.7986	3995.7	906.481	3.3	D2EC27:A0A8C4KT44:A0A8C4MNE2:A0A8C4MD75:A0A8C4PRJ1:A0A8C4MEB5:A0A8C4MCX6:A0A8C4PRX7		HCD
M1_3_RB1_1_8834.d	EPVKKL	F2:8116	6	95	95	6	713.459	1.2466-1.2627	0	712.448	4.2	A0A8C4MAC7:A0A8C4PQV7:A0A8C4MHP1:A0A8C4MKT7:A0A8C4MCS3		HCD
M1_3_RB1_1_8834.d	DLKQEKP	F2:4718	7	95	95	7	429.241	0.8346-0.8512	198.16	856.465	1.5	A0A8C4N279:A0A8C4L6A6:A0A8C4PSY6:A0A8C4MMW0		HCD
M1_3_RB1_1_8834.d	HESTNLS(+79.97)QEKYK	F2:10805	12	95	95	12	772.344	1.0469-1.0633	251380	1542.67	1.2	B7VGF9:C1L3G3:A0A8C4MHP1:A0A8C4MKT7:A0A8C4MCS3	Phosphorylation (STY)	HCD
M1_3_RB1_1_8834.d	NPGLHL	F2:33604	6	95	95	6	650.361	1.2256-1.2418	0	649.355	-1			HCD
M2-1_3_RB1_1_8839.d	LPPPPP	F5:21585	6	95	95	6	617.363	1.1538-1.1701	0	616.358	-4.5	A0A8C4M9E1:A0A8C4M3B4:A0A8C4LAX9:A0A8C4L5S0:A0A8C4LV13:A0A8C4M4P4:A0A8C4LX24:A0A8C4LYB5:A0A8C4LIZ6:A0A8C4MVP1:A0A8C4MP75:A0A8C4L1M4:A0A8C4L0M4:A0A8C4MAY6:A0A8C4M0R7:A0A8C4LUX7:A0A8C4NB56:A0A8C4MTY2:A0A8C4N2U9:A0A8C4LRB2:A0A8C4LSK6:A0A8C4MLD5:A0A8C4MJU3:A0A8C4MMK2:A0A8C4PSM7:A0A8C4MLT9:A0A8C4PSM5:A0A8C4L7E4:A0A8C4LKB4:A0A8C4LJ14:A0A8C4LL04:A0A8C4N944:A0A8C4MX71:A0A8C4MZF3:A0A8C4MX61:A0A8C4MXW9:A0A…		HCD
M1_3_RB1_1_8834.d	ERFVQDLSK	F2:41158	9	95	95	9	561.302	0.9015-0.9180	2253.8	1120.59	2.2			HCD
M2-1_3_RB1_1_8839.d	WPELE	F5:29844	5	95	95	5	673.322	1.1904-1.2067	0	672.312	4.2			HCD
M1_3_RB1_1_8834.d	KVVQD	F2:3308	5	95	95	5	588.337	1.1130-1.1293	0	587.328	3.3			HCD
M1_RB1_1_8657.d	HESTNLS(+79.97)QEKYK	F3:10598	12	95	95	12	772.343	1.0469-1.0633	241450	1542.67	0.1	B7VGF9:C1L3G3:A0A8C4MHP1:A0A8C4MKT7:A0A8C4MCS3	Phosphorylation (STY)	HCD
M1_2_RB1_1_8832.d	LEDDTKVL	F1:33794	8	95	95	8	466.752	0.8138-0.8304	630.77	931.486	4.4			HCD
M2-1_RB1_1_8659.d	A(+42.01)DKEKKKKESL	F6:2008	11	95	95	11	449.262	0.7522-0.7688	761.47	1344.76	2.2	A0A8C4PPH6:A0A8C4L1V5:A0A8C4L4B8:A0A8C4LAH0:A0A8C4MZE5:A0A8C4L946:A0A8C4LA58:A0A8C4L2G1:A0A8C4L6W9:A0A8C4MEI5:A0A8C4MEJ9:A0A8C4M6Y4:A0A8C4M530:A0A8C4MEG2:A0A8C4PKI3:A0A8C4PS52:A0A8C4L727:A0A8C4L5Z6:A0A8C4KQK5:A0A8C4MIZ0:A0A8C4MNB3:A0A8C4MP43:A0A8C4MAG6:A0A8C4M250:A0A8C4N115:A0A8C4MZ04:A0A8C4MB40:A0A8C4MK30:A0A8C4ML69:A0A8C4PQX9:A0A8C4MA26:A0A8C4MDS9:A0A8C4KXZ8	Acetylation (N-term)	HCD
M2-1_2_RB1_1_8837.d	DDERKL	F4:4222	6	95	95	6	388.202	0.7327-0.7494	11269	774.387	2.5	A0A8C4MKZ0		HCD
M1_3_RB1_1_8834.d	EDGPKFL	F2:38146	7	95	95	7	403.209	0.7390-0.7556	1110.5	804.402	1.7	A0A8C4L5X9		HCD
M1_RB1_1_8657.d	SLTDKLELTKEEK	F3:28583	13	95	95	13	511.948	0.8180-0.8346	652.73	1532.83	-4.5	A0A8C4LTE2:A0A8C4M6N0:A0A8C4PQ06:A0A8C4M9C8:A0A8C4M5V6:A0A8C4MUK2		HCD
M1_3_RB1_1_8834.d	PPPPPPP	F2:19650	7	95	95	7	698.386	1.1904-1.2067	0	697.38	-1.8	A0A8C4MTS8:A0A8C4LUM8:A0A8C4KXX4:A0A8C4M9E1:A0A8C4M3B4:A0A8C4LMY3:A0A8C4LNL1:A0A8C4LAX9:A0A8C4L5S0:A0A8C4LV13:A0A8C4LX24:A0A8C4LYB5:A0A8C4MZE5:A0A8C4LIZ6:A0A8C4LIA5:A0A8C4MVP1:A0A8C4MF50:A0A8C4MIB0:A0A8C4M7H9:A0A8C4MP75:A0A8C4L1M4:A0A8C4L0M4:A0A8C4MG23:A0A8C4MAY6:A0A8C4LUX7:A0A8C4NB56:A0A8C4MTY2:A0A8C4N2U9:A0A8C4LIL0:A0A8C4LI36:A0A8C4LI35:A0A8C4MLD5:A0A8C4MJU3:A0A8C4MMK2:A0A8C4PSM7:A0A8C4MLT9:A0A…		HCD
M1_2_RB1_1_8832.d	VERHNKDRKV	F1:3153	10	95	95	10	427.579	0.7091-0.7258	2717.4	1279.71	3.3			HCD
M1_RB1_1_8657.d	DPLTKT	F3:9785	6	95	95	6	674.374	1.1918-1.2080	0	673.365	2.3	A0A8C4KZN3:A0A8C4L2D4		HCD
M1_3_RB1_1_8834.d	HPLHFL	F2:38232	6	95	95	6	382.216	0.7667-0.7834	4144	762.418	0.8			HCD
M1_2_RB1_1_8832.d	DTVKKL	F1:8842	6	95	95	6	352.223	0.7223-0.7390	2586.2	702.428	5.6	A0A8C4L1V5:A0A8C4L4B8:A0A8C4LYI3:A0A8C4M135:A0A8C4M712		HCD
M1_2_RB1_1_8832.d	VM(+15.99)PFLK	F1:31413	6	95	95	6	750.423	1.2803-1.2964	0	749.415	1	D2EC27	Oxidation (M)	HCD
M1_3_RB1_1_8834.d	PPPPPKY	F2:23416	7	95	95	7	795.441	1.2756-1.2917	0	794.433	1.4	A0A8C4MG23:A0A8C4LIL0:A0A8C4LI36:A0A8C4LRB2:A0A8C4LSK6:A0A8C4LC31:A0A8C4MYX8:A0A8C4MU64:A0A8C4PU53:A0A8C4L727:A0A8C4L5Z6		HCD
M1_RB1_1_8657.d	APARPPPGGPGALAPLPR	F3:35906	18	95	95	18	564.662	0.8643-0.8808	39604	1690.96	0.3	A0A8C4N5V1:A0A8C4N1C2:A0A8C4M4P4:A0A8C4N8C5:A0A8C4LUX7:A0A8C4MNZ6:A0A8C4MP05:A0A8C4M1X1:A0A8C4N3Z1:A0A8C4LF53:A0A8C4LF38:A0A8C4LBJ9:A0A8C4LGH9:A0A8C4PQY9		HCD
M2-1_RB1_1_8659.d	EKEQ(+.98)LNVSSK	F6:9234	10	95	95	10	581.801	0.8946-0.9111	1763.3	1161.59	-1.1	A0A8C4PTH7	Deamidation (NQ)	HCD
M2-1_RB1_1_8659.d	EELKWK	F6:16449	6	95	95	6	416.733	0.7924-0.8090	1279.1	831.449	3.4			HCD
M1_RB1_1_8657.d	SPFLLKT	F3:41210	7	95	95	7	403.247	0.7598-0.7764	0	804.475	5.5	A0A8C4MKR0:A0A8C4MME7		HCD
M1_2_RB1_1_8832.d	DTKELVSSKVS	F1:20530	11	95	95	11	596.828	0.9187-0.9352	262.15	1191.63	5.2	A0A8C4LD25:A0A8C4PSY6:A0A8C4MMW0		HCD
M1_RB1_1_8657.d	DN(+.98)KVLRF	F3:33362	7	95	95	7	446.747	0.7931-0.8097	584.21	891.481	-3.2		Deamidation (NQ)	HCD
M1_RB1_1_8657.d	S(+79.97)EEKVQKF	F3:15721	8	95	95	8	537.75	0.8470-0.8636	7936.9	1073.48	5.2	D2EC27:A0A8C4KT44:A0A8C4MNE2:A0A8C4MD75:A0A8C4PRJ1:A0A8C4MEB5:A0A8C4MCX6:A0A8C4PRX7	Phosphorylation (STY)	HCD
M1_3_RB1_1_8834.d	DKALKKF	F2:9004	7	95	95	7	425.265	0.7667-0.7834	0	848.512	3.4	A0A8C4L1G5		HCD
M2-1_RB1_1_8659.d	DAAQGRPGGAW	F6:19833	11	95	95	11	543.261	0.8201-0.8367	17235	1084.5	3.1			HCD
M1_RB1_1_8657.d	APARPPPGGPGASAPLRP	F3:24832	18	95	95	18	555.979	0.8994-0.9160	73572	1664.91	3.4	A0A8C4N5V1:A0A8C4N1C2:A0A8C4PJ30:A0A8C4M4P4:A0A8C4N8C5:A0A8C4LUX7:A0A8C4M1X1:A0A8C4LF53:A0A8C4LF38:A0A8C4LBJ9:A0A8C4LGH9:A0A8C4L2K7:A0A8C4PQY9		HCD
M1_RB1_1_8657.d	DTKELVSSKVS	F3:20338	11	95	95	11	596.828	0.9256-0.9421	166.9	1191.63	5.2	A0A8C4LD25:A0A8C4PSY6:A0A8C4MMW0		HCD
M1_RB1_1_8657.d	SLSSKLR	F3:11251	7	95	95	7	395.743	0.7889-0.8055	5228.2	789.471	0.8	A0A8C4MSR3:A0A8C4N8C5:A0A8C4LSJ3:A0A8C4LU33		HCD
M1_RB1_1_8657.d	DPNHFRPR	F3:8729	8	95	95	8	346.844	0.7049-0.7216	0	1037.52	-6.3	A0A8C4LEB1		HCD
M1_2_RB1_1_8832.d	DDLSKV	F1:14755	6	95	95	6	676.35	1.1931-1.2094	0	675.344	-1.3			HCD
M2-1_RB1_1_8659.d	WGQEN(+.98)GHVKV	F6:10624	10	95	95	10	577.782	0.8864-0.9029	0	1153.55	-1.8	A0A8C4PK97	Deamidation (NQ)	HCD
M2-1_2_RB1_1_8837.d	WPELE	F4:29440	5	95	95	5	673.323	1.1891-1.2053	0	672.312	5.3			HCD
M1_3_RB1_1_8834.d	LDAQKKKL	F2:3217	8	95	95	8	472.3	0.8408-0.8574	0	942.586	-0.4	A0A8C4PI67:A0A8C4LYF5:A0A8C4LBK3		HCD
M2-1_3_RB1_1_8839.d	AKDMW	F5:19409	5	95	95	5	650.299	1.1850-1.2012	0	649.289	3.2			HCD
M2-1_3_RB1_1_8839.d	DGN(+.98)KPVRM	F5:9348	8	95	95	8	459.231	0.7792-0.7958	16044	916.444	4.4		Deamidation (NQ)	HCD
M1_3_RB1_1_8834.d	VGLGKKKKV	F2:2936	9	95	95	9	478.834	0.8457-0.8622	0	955.654	-1.9	A0A8C4L9Q0:A0A8C4L4N3		HCD
M2-1_2_RB1_1_8837.d	EELKWK	F4:16505	6	95	95	6	416.733	0.7827-0.7993	1867.3	831.449	3.3			HCD
M2-1_RB1_1_8659.d	DN(+.98)GLSAAARKQ	F6:8976	11	95	95	11	566.292	0.8953-0.9118	2189.7	1130.57	0.6	A0A8C4MP75:A0A8C4LZI7:A0A8C4LSX9:A0A8C4LQG6:A0A8C4LSB3:A0A8C4LRV3	Deamidation (NQ)	HCD
M2-1_2_RB1_1_8837.d	PPPPPP	F4:12621	6	95	95	6	601.335	1.1273-1.1436	0	600.327	1.8	A0A8C4MTS8:A0A8C4LUM8:A0A8C4KXX4:A0A8C4M9E1:A0A8C4M3B4:A0A8C4LMY3:A0A8C4LNL1:A0A8C4LAX9:A0A8C4L5S0:A0A8C4LV13:A0A8C4LX24:A0A8C4LYB5:A0A8C4MZE5:A0A8C4LIZ6:A0A8C4LIA5:A0A8C4MVP1:A0A8C4MF50:A0A8C4MIB0:A0A8C4M7H9:A0A8C4MP75:A0A8C4L1M4:A0A8C4L0M4:A0A8C4MG23:A0A8C4MAY6:A0A8C4LUX7:A0A8C4NB56:A0A8C4MTY2:A0A8C4N2U9:A0A8C4LIL0:A0A8C4LI36:A0A8C4LI35:A0A8C4MLD5:A0A8C4MJU3:A0A8C4MMK2:A0A8C4PSM7:A0A8C4MLT9:A0A…		HCD
M2-1_2_RB1_1_8837.d	EEEL	F4:11853	4	95	95	4	519.232	1.0619-1.0783	0	518.222	4.8			HCD
M2-1_2_RB1_1_8837.d	LDQ(+.98)ASKQLTPQ	F4:16402	11	95	95	11	615.319	0.9290-0.9455	751.32	1228.63	-5.7	A0A8C4LA77	Deamidation (NQ)	HCD
M1_2_RB1_1_8832.d	EKVQKYK	F1:4344	7	95	95	7	461.774	0.8291-0.8457	108.64	921.528	4.5			HCD
M2-1_3_RB1_1_8839.d	EN(+.98)VETSKKW	F5:13153	9	95	95	9	561.274	0.8532-0.8698	2193.3	1120.54	-5.4	A0A8C4MES9	Deamidation (NQ)	HCD
M2-1_2_RB1_1_8837.d	LPPPTE	F4:14446	6	95	95	6	653.349	1.1884-1.2046	0	652.343	-1.8			HCD
M1_RB1_1_8657.d	EELLR	F3:20272	5	95	95	5	659.374	1.2256-1.2418	0	658.365	3.3			HCD
M2-1_2_RB1_1_8837.d	DEDKYL	F4:18244	6	95	95	6	391.683	0.7556-0.7723	62609	781.349	2.4	A0A8C4LXL5		HCD
M1_2_RB1_1_8832.d	LQ(+.98)LTKEEKLYKL	F1:35285	12	95	95	12	502.966	0.8132-0.8298	7028.9	1505.87	3.6	A0A8C4M7I4:A0A8C4LTE2:A0A8C4LBN5	Deamidation (NQ)	HCD
M1_2_RB1_1_8832.d	DPATQPLVPVHNPVLN	F1:48472	16	95	95	16	855.968	1.0940-1.1103	46222	1709.91	7	D2EC27		HCD
M1_RB1_1_8657.d	EANYLGADKYF	F3:43908	11	95	95	11	645.804	0.9428-0.9593	1948.2	1289.59	0.8	A0A8C4LEB1:A0A8C4MGQ5		HCD
M1_2_RB1_1_8832.d	LPVLEKN	F1:27144	7	95	95	7	406.747	0.7681-0.7848	3018	811.48	-0.4			HCD
M2-1_3_RB1_1_8839.d	LPPPYD	F5:20439	6	95	95	6	701.352	1.2215-1.2378	0	700.343	1.9			HCD
M2-1_RB1_1_8659.d	EDGHVKV	F6:5922	7	95	95	7	392.204	0.7466-0.7633	4653.3	782.392	2.5			HCD
M1_2_RB1_1_8832.d	DN(+.98)SLLRL	F1:50080	7	95	95	7	416.233	0.7730-0.7896	291.7	830.45	3.1		Deamidation (NQ)	HCD
M1_3_RB1_1_8834.d	LPVLR	F2:28686	5	95	95	5	597.409	1.1796-1.1958	0	596.401	0.6			HCD
M2-1_3_RB1_1_8839.d	KGNLEYK	F5:4861	7	95	95	7	426.236	0.7882-0.8049	2222	850.455	2.2			HCD
M1_RB1_1_8657.d	KGNLEYKEVVPLNTEK	F3:31062	16	95	95	16	621.007	0.8870-0.9036	5291.8	1860	0.4	P86272:C3W972		HCD
M2-1_3_RB1_1_8839.d	DDDWLR	F5:25681	6	95	95	6	410.187	0.7882-0.8049	0	818.356	4.7	A0A8C4M1V4:A0A8C4M313:A0A8C4M305		HCD
M1_3_RB1_1_8834.d	LPTQTSQ	F2:10319	7	95	95	7	774.397	1.2762-1.2924	0	773.392	-3.1	A0A8C4LD23		HCD
M1_2_RB1_1_8832.d	SPLPN(+.98)LFPADFK	F1:57067	12	95	95	12	673.855	0.9338-0.9503	13983	1345.69	2.2	A0A8C4LDF2:A0A8C4LHM4:A0A8C4LGD8	Deamidation (NQ)	HCD
M1_3_RB1_1_8834.d	VEERPLKV	F2:30675	8	95	95	8	485.292	0.8166-0.8332	466.84	968.565	3.8			HCD
M1_2_RB1_1_8832.d	KLALL	F1:42457	5	95	95	5	557.405	1.1470-1.1633	0	556.395	4.7			HCD
M1_2_RB1_1_8832.d	FVEKKAKLEHC	F1:18370	11	95	95	11	444.575	0.7515-0.7681	1428.2	1330.71	-3.2	A0A8C4LZJ8:A0A8C4M8A7:A0A8C4PT15		HCD
M1_RB1_1_8657.d	M(+42.01)NHTFQTSVSGVH	F3:37421	13	95	95	13	743.841	1.0305-1.0469	949.42	1485.67	0.8		Acetylation (N-term)	HCD
M1_RB1_1_8657.d	S(+79.97)EEKVQKF	F3:15807	8	95	95	8	537.75	0.8505-0.8671	7936.9	1073.48	5.2	D2EC27:A0A8C4KT44:A0A8C4MNE2:A0A8C4MD75:A0A8C4PRJ1:A0A8C4MEB5:A0A8C4MCX6:A0A8C4PRX7	Phosphorylation (STY)	HCD
M2-1_3_RB1_1_8839.d	M(+42.01)DKL	F5:26586	4	95	95	4	548.275	1.1321-1.1484	0	547.268	0.3		Acetylation (N-term)	HCD
M2-1_3_RB1_1_8839.d	EEVVKKL	F5:12008	7	95	95	7	422.763	0.7653-0.7820	252.81	843.506	5.5			HCD
M1_RB1_1_8657.d	EKEKLKKL	F3:5171	8	95	95	8	508.329	0.8477-0.8643	1323.4	1014.64	0.2	A0A8C4M3B4:A0A8C4MLY4:A0A8C4MMG4:A0A8C4MHC3:A0A8C4MHB5:A0A8C4MFI2:A0A8C4MWY8:A0A8C4N6K9:A0A8C4N092:A0A8C4MZN1:A0A8C4N4N8:A0A8C4MZ38:A0A8C4PVB2:A0A8C4LSJ3:A0A8C4LU33:A0A8C4LUP4:A0A8C4LX95:A0A8C4M6N0:A0A8C4PQ06:A0A8C4M9C8:A0A8C4M5V6:A0A8C4M7C4:A0A8C4N6S8:A0A8C4LFA4:A0A8C4LJQ2:A0A8C4LFL1:A0A8C4LLG2:A0A8C4MQW4:A0A8C4PU43:A0A8C4PNY0:A0A8C4MUH0		HCD
M1_2_RB1_1_8832.d	DRLEEK	F1:3133	6	95	95	6	395.208	0.7556-0.7723	718.5	788.403	-1.6	A0A8C4MSR3		HCD
M1_RB1_1_8657.d	KPPVV	F3:14179	5	95	95	5	539.356	1.0783-1.0946	0	538.348	1.6			HCD
M1_2_RB1_1_8832.d	PPPGGPGASAPLRP	F1:24836	14	95	95	14	635.852	0.9867-1.0031	5638.9	1269.68	5.1	A0A8C4N5V1:A0A8C4N1C2:A0A8C4PJ30:A0A8C4M4P4:A0A8C4N8C5:A0A8C4LBJ9:A0A8C4LGH9:A0A8C4L2K7		HCD
M1_RB1_1_8657.d	DDLVSK	F3:10972	6	95	95	6	676.348	1.2134-1.2297	0	675.344	-4.3	A0A8C4MEK9:A0A8C4MQV9		HCD
M2-1_RB1_1_8659.d	HESTNLSQEKYK	F6:6268	12	95	95	12	488.577	0.8138-0.8304	22386	1462.71	2.6	B7VGF9:C1L3G3:A0A8C4MHP1:A0A8C4MKT7:A0A8C4MCS3		HCD
M2-1_3_RB1_1_8839.d	DN(+.98)HLVRL	F5:19249	7	95	95	7	434.238	0.7771-0.7938	0	866.461	0		Deamidation (NQ)	HCD
M1_2_RB1_1_8832.d	EPVKKV	F1:4422	6	95	95	6	699.441	1.2270-1.2432	0	698.433	1.4	A0A8C4M5J3:A0A8C4M6R7:A0A8C4KZL8		HCD
M2-1_3_RB1_1_8839.d	HEGQQQREVEHQDK	F5:1158	14	95	95	14	583.271	0.8436-0.8601	0	1746.8	-6.6	D2EC27		HCD
M2-1_2_RB1_1_8837.d	LETKEEKL	F4:13065	8	95	95	8	495.281	0.8298-0.8463	33250	988.544	3.2	A0A8C4M7I4		HCD
M2-1_3_RB1_1_8839.d	PPLKLP	F5:27615	6	95	95	6	332.724	0.7626-0.7792	385.48	663.432	2.4	A0A8C4MEG2:A0A8C4LZZ3:A0A8C4MPW1:A0A8C4MUI6		HCD
M1_3_RB1_1_8834.d	TPLVKKL	F2:21234	7	95	95	7	399.777	0.7799-0.7965	99.445	797.537	3.1	A0A8C4LZ03:A0A8C4LJD7:A0A8C4LKU6		HCD
M1_2_RB1_1_8832.d	MADQ(+.98)AGSKADPED	F1:10913	13	95	95	13	668.275	0.9235-0.9400	3132.9	1334.53	4.8		Deamidation (NQ)	HCD
M1_3_RB1_1_8834.d	LLPTET	F2:28184	6	95	95	6	673.377	1.2026-1.2188	0	672.369	0.1			HCD
M2-1_2_RB1_1_8837.d	KHESTNLSQEK	F4:1826	11	95	95	11	650.831	0.9393-0.9558	774.09	1299.64	4.1	B7VGF9:C1L3G3		HCD
M1_2_RB1_1_8832.d	TPKKPK	F1:1408	6	95	95	6	349.732	0.7529-0.7695	1857.8	697.449	1.2	A0A8C4MPW1:A0A8C4MUI6		HCD
M2-1_RB1_1_8659.d	DRLEE	F6:4478	5	95	95	5	661.317	1.1843-1.2006	0	660.308	2.6			HCD
M1_3_RB1_1_8834.d	SKSRKF	F2:2113	6	95	95	6	376.725	0.7640-0.7806	0	751.434	2.6	A0A8C4LXL5		HCD
M2-1_RB1_1_8659.d	EELKWK	F6:16397	6	95	95	6	416.732	0.7931-0.8097	0	831.449	1.4			HCD
M2-1_3_RB1_1_8839.d	EELKLKKV	F5:13164	8	95	95	8	493.817	0.8360-0.8526	0	985.617	2.3	A0A8C4MHR2:A0A8C4PS80:A0A8C4PRW9:A0A8C4PMN6:A0A8C4LPE2:A0A8C4PV63		HCD
M2-1_3_RB1_1_8839.d	DPNHFRPR	F5:6318	8	95	95	8	519.767	0.8477-0.8643	9152.5	1037.52	4.1	A0A8C4LEB1		HCD
M2-1_RB1_1_8659.d	NEDPLTKT	F6:11873	8	95	95	8	459.233	0.8000-0.8166	9242.7	916.45	2.4	A0A8C4KZN3:A0A8C4L2D4		HCD
M1_2_RB1_1_8832.d	HESTNLS(+79.97)QEKYK	F1:10850	12	95	95	12	772.345	1.0250-1.0414	242750	1542.67	2.4	B7VGF9:C1L3G3:A0A8C4MHP1:A0A8C4MKT7:A0A8C4MCS3	Phosphorylation (STY)	HCD
M1_RB1_1_8657.d	DSEKPKKL	F3:4040	8	95	95	8	472.775	0.8208-0.8374	244.63	943.534	2.1	A0A8C4LML2		HCD
M1_3_RB1_1_8834.d	DLKLDLR	F2:37881	7	95	95	7	436.763	0.7910-0.8076	136.09	871.513	-0.7			HCD
M1_2_RB1_1_8832.d	GPPTKKL	F1:6950	7	95	95	7	370.738	0.7251-0.7417	1609.1	739.459	3.6	A0A8C4L8E3		HCD
M2-1_RB1_1_8659.d	DDERKL	F6:4136	6	95	95	6	388.201	0.7494-0.7660	11318	774.387	1.5	A0A8C4MKZ0		HCD
M1_2_RB1_1_8832.d	HESTNLS(+79.97)QEKYK	F1:10639	12	95	95	12	772.345	1.0339-1.0503	242750	1542.67	2.4	B7VGF9:C1L3G3:A0A8C4MHP1:A0A8C4MKT7:A0A8C4MCS3	Phosphorylation (STY)	HCD
M1_2_RB1_1_8832.d	HESTNLS(+79.97)QEKYK	F1:10771	12	95	95	12	772.345	1.0510-1.0674	242750	1542.67	2.4	B7VGF9:C1L3G3:A0A8C4MHP1:A0A8C4MKT7:A0A8C4MCS3	Phosphorylation (STY)	HCD
M2-1_3_RB1_1_8839.d	KGNLEYK	F5:4824	7	95	95	7	426.236	0.7979-0.8145	2222	850.455	2.2			HCD
M2-1_2_RB1_1_8837.d	EANYLGADKYFHA	F4:27099	13	95	95	13	749.854	1.0011-1.0175	1032.2	1497.69	2.8	A0A8C4LEB1:A0A8C4MGQ5		HCD
M2-1_RB1_1_8659.d	EEKVQKF	F6:8897	7	95	95	7	454.249	0.7889-0.8055	3974.2	906.481	3.1	D2EC27:A0A8C4KT44:A0A8C4MNE2:A0A8C4MD75:A0A8C4PRJ1:A0A8C4MEB5:A0A8C4MCX6:A0A8C4PRX7		HCD
M2-1_2_RB1_1_8837.d	PPPPPP	F4:22223	6	95	95	6	601.337	1.1545-1.1708	0	600.327	5.1	A0A8C4MTS8:A0A8C4LUM8:A0A8C4KXX4:A0A8C4M9E1:A0A8C4M3B4:A0A8C4LMY3:A0A8C4LNL1:A0A8C4LAX9:A0A8C4L5S0:A0A8C4LV13:A0A8C4LX24:A0A8C4LYB5:A0A8C4MZE5:A0A8C4LIZ6:A0A8C4LIA5:A0A8C4MVP1:A0A8C4MF50:A0A8C4MIB0:A0A8C4M7H9:A0A8C4MP75:A0A8C4L1M4:A0A8C4L0M4:A0A8C4MG23:A0A8C4MAY6:A0A8C4LUX7:A0A8C4NB56:A0A8C4MTY2:A0A8C4N2U9:A0A8C4LIL0:A0A8C4LI36:A0A8C4LI35:A0A8C4MLD5:A0A8C4MJU3:A0A8C4MMK2:A0A8C4PSM7:A0A8C4MLT9:A0A…		HCD
M1_RB1_1_8657.d	M(+42.01)NHTF	F3:35565	5	95	95	5	691.285	1.2432-1.2594	0	690.279	-2.6		Acetylation (N-term)	HCD
M1_RB1_1_8657.d	HESTNLS(+79.97)QEKYK	F3:10674	12	95	95	12	772.343	1.0578-1.0742	241450	1542.67	0.1	B7VGF9:C1L3G3:A0A8C4MHP1:A0A8C4MKT7:A0A8C4MCS3	Phosphorylation (STY)	HCD
M2-1_RB1_1_8659.d	EDQ(+.98)DKAFKQ	F6:8050	9	95	95	9	555.26	0.8684-0.8850	447.59	1108.5	0.9		Deamidation (NQ)	HCD
M1_RB1_1_8657.d	M(+42.01)(+15.99)NHTFQTSVSGVH	F3:28594	13	95	95	13	751.84	1.0421-1.0585	877.71	1501.66	1.7		Acetylation (N-term); Oxidation (M)	HCD
M1_3_RB1_1_8834.d	DDFQHRKF	F2:36200	8	95	95	8	546.762	0.8457-0.8622	124.14	1091.51	-5.6			HCD
M1_RB1_1_8657.d	LPAPLTQ	F3:34262	7	95	95	7	739.431	1.2789-1.2951	0	738.428	-5.6	A0A8C4LWI6		HCD
M2-1_RB1_1_8659.d	M(+15.99)PEDKYLKF	F6:26442	9	95	95	9	396.196	0.7278-0.7445	0	1185.57	-6.2	A0A8C4LXL5	Oxidation (M)	HCD
M2-1_RB1_1_8659.d	KHESTNLSQEK	F6:1869	11	95	95	11	650.827	0.9448-0.9613	695.89	1299.64	-1.1	B7VGF9:C1L3G3		HCD
M1_3_RB1_1_8834.d	VEPNKKV	F2:11386	7	95	95	7	407.247	0.7584-0.7751	1570.3	812.476	4.3			HCD
M1_3_RB1_1_8834.d	ETLLPK	F2:26048	6	95	95	6	700.422	1.2749-1.2911	0	699.417	-2.3	D2EC27		HCD
M1_RB1_1_8657.d	APARPPPGGPGASAPLRP	F3:24747	18	95	95	18	555.979	0.8608-0.8774	73572	1664.91	3.4	A0A8C4N5V1:A0A8C4N1C2:A0A8C4PJ30:A0A8C4M4P4:A0A8C4N8C5:A0A8C4LUX7:A0A8C4M1X1:A0A8C4LF53:A0A8C4LF38:A0A8C4LBJ9:A0A8C4LGH9:A0A8C4L2K7:A0A8C4PQY9		HCD
M1_RB1_1_8657.d	LPVHLL	F3:46758	6	95	95	6	346.23	0.7542-0.7709	4885.8	690.443	3.6	D2EC27		HCD
M1_RB1_1_8657.d	M(+42.01)(+15.99)LKLF	F3:54891	5	95	95	5	709.394	1.2843-1.3005	0	708.388	-1.9		Acetylation (N-term); Oxidation (M)	HCD
M1_2_RB1_1_8832.d	TPVTKL	F1:20066	6	95	95	6	658.413	1.2060-1.2222	0	657.406	-1.4	A0A8C4LHK7		HCD
M1_3_RB1_1_8834.d	PPPPYK	F2:31211	6	95	95	6	698.39	1.2168-1.2330	0	697.38	3.9			HCD
M2-1_2_RB1_1_8837.d	SEEKVQKF	F4:9113	8	95	95	8	497.765	0.8201-0.8367	1301.4	993.513	2.4	D2EC27:A0A8C4KT44:A0A8C4MNE2:A0A8C4MD75:A0A8C4PRJ1:A0A8C4MEB5:A0A8C4MCX6:A0A8C4PRX7		HCD
M1_3_RB1_1_8834.d	ELTKEE	F2:6018	6	95	95	6	748.376	1.2547-1.2708	0	747.365	5.5	A0A8C4LTE2		HCD
M2-1_3_RB1_1_8839.d	M(+42.01)EGAEEKKK	F5:4815	9	95	95	9	546.277	0.8808-0.8974	706.45	1090.53	6.1	A0A8C4LYI3:A0A8C4M135:A0A8C4M712	Acetylation (N-term)	HCD
M1_2_RB1_1_8832.d	HPELLQ	F1:20128	6	95	95	6	736.398	1.2378-1.2540	0	735.391	-1.2	P86272:C3W972:A0A8C4PJH0		HCD
M1_2_RB1_1_8832.d	APARPPPGGPGALAPLPR	F1:36355	18	95	95	18	564.664	0.9462-0.9627	4725.8	1690.96	4.9	A0A8C4N5V1:A0A8C4N1C2:A0A8C4M4P4:A0A8C4N8C5:A0A8C4LUX7:A0A8C4MNZ6:A0A8C4MP05:A0A8C4M1X1:A0A8C4N3Z1:A0A8C4LF53:A0A8C4LF38:A0A8C4LBJ9:A0A8C4LGH9:A0A8C4PQY9		HCD
M1_RB1_1_8657.d	KVREVK	F3:1581	6	95	95	6	379.748	0.7723-0.7889	0	757.481	0.4			HCD
M2-1_RB1_1_8659.d	EPVKKL	F6:5607	6	95	95	6	357.232	0.7431-0.7598	5840.8	712.448	2.4	A0A8C4MAC7:A0A8C4PQV7:A0A8C4MHP1:A0A8C4MKT7:A0A8C4MCS3		HCD
M1_2_RB1_1_8832.d	TVNTVLGSKLLPTQ	F1:51458	14	95	95	14	735.934	1.0141-1.0305	1124.9	1469.85	5.5	A0A8C4LD23:A0A8C4MSR3:A0A8C4ML69:A0A8C4PQX9:A0A8C4MA26:A0A8C4MDS9		HCD
M1_2_RB1_1_8832.d	M(+42.01)(+15.99)ERAETLLR	F1:31047	9	95	95	9	588.809	0.9400-0.9565	7700.4	1175.6	5.3		Acetylation (N-term); Oxidation (M)	HCD
M1_2_RB1_1_8832.d	TKENKHLVM(+15.99)	F1:26671	9	95	95	9	558.3	0.8808-0.8974	0	1114.58	3.9		Oxidation (M)	HCD
M1_2_RB1_1_8832.d	LPLL	F1:52955	4	95	95	4	455.325	1.0407-1.0571	0	454.315	4.5			HCD
M1_2_RB1_1_8832.d	PLTKT	F1:4405	5	95	95	5	559.347	1.1769-1.1931	0	558.338	4			HCD
M1_RB1_1_8657.d	APARPPPGGPGALAPLPR	F3:35741	18	95	95	18	564.662	0.9593-0.9757	6774.5	1690.96	0.8	A0A8C4N5V1:A0A8C4N1C2:A0A8C4M4P4:A0A8C4N8C5:A0A8C4LUX7:A0A8C4MNZ6:A0A8C4MP05:A0A8C4M1X1:A0A8C4N3Z1:A0A8C4LF53:A0A8C4LF38:A0A8C4LBJ9:A0A8C4LGH9:A0A8C4PQY9		HCD
M1_2_RB1_1_8832.d	TPKGEKFPSMSEA	F1:26279	13	95	95	13	704.846	0.9942-1.0107	5124.4	1407.67	5.1	A0A8C4LD23		HCD
M1_RB1_1_8657.d	HQTTMDPQSHKVLL	F3:27845	14	95	95	14	545.615	0.8291-0.8457	3430.6	1633.82	-0.8	B7VGF9:A0A8C4MBA7		HCD
M1_3_RB1_1_8834.d	APARPPPGGPGALAPLPR	F2:36408	18	95	95	18	564.664	0.8705-0.8870	40067	1690.96	3.6	A0A8C4N5V1:A0A8C4N1C2:A0A8C4M4P4:A0A8C4N8C5:A0A8C4LUX7:A0A8C4MNZ6:A0A8C4MP05:A0A8C4M1X1:A0A8C4N3Z1:A0A8C4LF53:A0A8C4LF38:A0A8C4LBJ9:A0A8C4LGH9:A0A8C4PQY9		HCD
M1_3_RB1_1_8834.d	APARPPPGGPGALAPLPR	F2:36481	18	95	95	18	564.664	0.8739-0.8905	40067	1690.96	3.6	A0A8C4N5V1:A0A8C4N1C2:A0A8C4M4P4:A0A8C4N8C5:A0A8C4LUX7:A0A8C4MNZ6:A0A8C4MP05:A0A8C4M1X1:A0A8C4N3Z1:A0A8C4LF53:A0A8C4LF38:A0A8C4LBJ9:A0A8C4LGH9:A0A8C4PQY9		HCD
M1_RB1_1_8657.d	PPKLHP	F3:7167	6	95	95	6	344.71	0.7209-0.7376	851.75	687.407	-2.4			HCD
M1_RB1_1_8657.d	DEEKNFKA	F3:10420	8	95	95	8	490.74	0.8235-0.8401	0	979.461	3.7			HCD
M2-1_2_RB1_1_8837.d	ETLLR	F4:14062	5	95	95	5	631.379	1.1823-1.1985	0	630.37	2.9			HCD
M2-1_2_RB1_1_8837.d	LEELKWK	F4:23487	7	95	95	7	473.276	0.8277-0.8443	180.25	944.533	3.6			HCD
M2-1_3_RB1_1_8839.d	DEEKNFKA	F5:7931	8	94	94	8	490.739	0.8138-0.8304	1995.3	979.461	2.5			HCD
M1_2_RB1_1_8832.d	HSDAVSLAM(+15.99)LKPDPSQK	F1:31272	17	94	94	17	613.983	0.9022-0.9187	20453	1838.92	4.4	A0A8C4LXL5:A0A8C4MLW6	Oxidation (M)	HCD
M1_RB1_1_8657.d	KQEELLK	F3:12999	7	94	94	7	444.265	0.8180-0.8346	150.12	886.512	4.2	A0A8C4LIL0:A0A8C4LI36:A0A8C4MR72:A0A8C4M1Y3:A0A8C4M2V3:A0A8C4M099:A0A8C4M5N7:A0A8C4LZT9:A0A8C4MAG6:A0A8C4M250:A0A8C4M686:A0A8C4MBZ9:A0A8C4MBY1:A0A8C4MMY0:A0A8C4MLM0:A0A8C4MML9:A0A8C4MXX8:A0A8C4L8T7:A0A8C4PII1		HCD
M1_RB1_1_8657.d	EPVKKL	F3:8048	6	94	94	6	357.232	0.7403-0.7570	3635.8	712.448	0.4	A0A8C4MAC7:A0A8C4PQV7:A0A8C4MHP1:A0A8C4MKT7:A0A8C4MCS3		HCD
M1_RB1_1_8657.d	DERFF	F3:38231	5	94	94	5	713.327	1.2472-1.2634	0	712.318	3			HCD
M2-1_3_RB1_1_8839.d	EELKWK	F5:16671	6	94	94	6	416.733	0.7827-0.7993	1883.1	831.449	3.6			HCD
M2-1_2_RB1_1_8837.d	HESTNLS(+79.97)QEKYK	F4:8078	12	94	94	12	772.344	1.0325-1.0489	387980	1542.67	1.4	B7VGF9:C1L3G3:A0A8C4MHP1:A0A8C4MKT7:A0A8C4MCS3	Phosphorylation (STY)	HCD
M1_3_RB1_1_8834.d	KHESTNLS(+79.97)QEKYK	F2:8306	13	94	94	13	557.931	0.8263-0.8429	89247	1670.77	2.2	B7VGF9:C1L3G3:A0A8C4MHP1:A0A8C4MKT7:A0A8C4MCS3	Phosphorylation (STY)	HCD
M1_RB1_1_8657.d	HPK(+42.01)KE	F3:3300	5	94	94	5	340.691	0.7077-0.7244	732.73	679.365	2.4		Acetylation (K)	HCD
M2-1_3_RB1_1_8839.d	APFPEV	F5:29723	6	94	94	6	659.341	1.1897-1.2060	0	658.333	1.6			HCD
M2-1_RB1_1_8659.d	LETKEEKL	F6:13171	8	94	94	8	495.28	0.8429-0.8595	33475	988.544	1.6	A0A8C4M7I4		HCD
M1_RB1_1_8657.d	YPFKPP	F3:33544	6	94	94	6	374.706	0.7716-0.7882	0	747.395	1.5	A0A8C4MQ72:A0A8C4ML18:A0A8C4MQF3		HCD
M1_2_RB1_1_8832.d	LPKKSL	F1:6189	6	94	94	6	343.236	0.7056-0.7223	3653	684.453	5	A0A8C4MEW8		HCD
M1_3_RB1_1_8834.d	P(+42.01)AAPEKPVKKQ	F2:11236	11	94	94	11	617.864	0.9008-0.9173	9111.5	1233.71	4.9	A0A8C4LD25:A0A8C4MF50:A0A8C4MIB0:A0A8C4M7H9	Acetylation (N-term)	HCD
M2-1_3_RB1_1_8839.d	DPVKKL	F5:7631	6	94	94	6	350.223	0.7077-0.7244	509.28	698.433	-1.6	A0A8C4M5J3:A0A8C4M6R7		HCD
M1_RB1_1_8657.d	VEKGPKV	F3:17722	7	94	94	7	378.733	0.7258-0.7424	252.6	755.454	-4			HCD
M2-1_3_RB1_1_8839.d	N(+.98)SSEERF	F5:11917	7	94	94	7	435.188	0.7647-0.7813	1394.9	868.356	6.2		Deamidation (NQ)	HCD
M1_2_RB1_1_8832.d	LDDTKVL	F1:28042	7	94	94	7	402.231	0.7660-0.7827	477.85	802.444	5.2			HCD
M1_RB1_1_8657.d	PDKY	F3:16389	4	94	94	4	522.259	1.0599-1.0762	0	521.249	5.6			HCD
M1_2_RB1_1_8832.d	HPLHFL	F1:38413	6	94	94	6	382.217	0.7653-0.7820	3917.2	762.418	2			HCD
M1_RB1_1_8657.d	EELEQRL	F3:40300	7	94	94	7	458.742	0.8311-0.8477	0	915.466	3.9	A0A8C4MAK5:A0A8C4LCR7:A0A8C4LIJ3		HCD
M2-1_2_RB1_1_8837.d	DDERKL	F4:4163	6	94	94	6	388.202	0.7417-0.7584	11269	774.387	2.5	A0A8C4MKZ0		HCD
M2-1_3_RB1_1_8839.d	VPYPTQ	F5:19056	6	94	94	6	704.366	1.2445-1.2607	0	703.354	6.8			HCD
M2-1_3_RB1_1_8839.d	LPDKY	F5:12925	5	94	94	5	635.341	1.1958-1.2121	0	634.333	0.9			HCD
M1_3_RB1_1_8834.d	S(+79.97)EEKVQKF	F2:15841	8	94	94	8	537.75	0.8394-0.8560	7138.4	1073.48	5	D2EC27:A0A8C4KT44:A0A8C4MNE2:A0A8C4MD75:A0A8C4PRJ1:A0A8C4MEB5:A0A8C4MCX6:A0A8C4PRX7	Phosphorylation (STY)	HCD
M2-1_RB1_1_8659.d	LPDKY	F6:13115	5	94	94	5	635.337	1.2107-1.2270	0	634.333	-4.3			HCD
M1_RB1_1_8657.d	EKEELNVSSK	F3:11710	10	94	94	10	581.802	0.8967-0.9132	488.52	1161.59	1.2	D2EC27:A0A8C4MZM0		HCD
M1_RB1_1_8657.d	HESTNLSQEKY	F3:13612	11	94	94	11	668.313	0.9524-0.9689	12564	1334.61	1.4	B7VGF9:C1L3G3		HCD
M2-1_3_RB1_1_8839.d	HESTNLS(+79.97)QEKYK	F5:8320	12	94	94	12	772.345	1.0592-1.0756	390870	1542.67	2.2	B7VGF9:C1L3G3:A0A8C4MHP1:A0A8C4MKT7:A0A8C4MCS3	Phosphorylation (STY)	HCD
M1_RB1_1_8657.d	M(+42.01)DGFR	F3:36722	5	94	94	5	667.29	1.2330-1.2493	0	666.279	5.2		Acetylation (N-term)	HCD
M2-1_RB1_1_8659.d	DPQSHKVL	F6:9730	8	94	94	8	462.252	0.7868-0.8035	1472.7	922.487	3.5	A0A8C4MBA7		HCD
M1_3_RB1_1_8834.d	YLPRLK	F2:23542	6	94	94	6	395.252	0.7640-0.7806	1439.9	788.491	-2.9	A0A8C4M8M6		HCD
M2-1_RB1_1_8659.d	HPELLQ	F6:15872	6	94	94	6	736.4	1.2479-1.2641	0	735.391	1.2	P86272:C3W972:A0A8C4PJH0		HCD
M1_3_RB1_1_8834.d	TLEQLR	F2:20470	6	94	94	6	759.435	1.2810-1.2971	0	758.429	-0.7	P86272		HCD
M1_3_RB1_1_8834.d	DEDKYL	F2:23364	6	94	94	6	391.683	0.7577-0.7744	1782.5	781.349	1.9	A0A8C4LXL5		HCD
M2-1_RB1_1_8659.d	DSPFLK	F6:22627	6	94	94	6	706.375	1.2303-1.2466	0	705.37	-2.6			HCD
M1_RB1_1_8657.d	EDEDKYL	F3:23818	7	94	94	7	456.205	0.8097-0.8263	1339.4	910.392	4.1	A0A8C4LXL5:A0A8C4KQK5		HCD
M1_RB1_1_8657.d	M(+42.01)DKLK	F3:22092	5	94	94	5	676.369	1.2364-1.2526	0	675.362	-1.6		Acetylation (N-term)	HCD
M1_2_RB1_1_8832.d	YDPPK(+42.01)	F1:36121	5	94	94	5	661.322	1.1999-1.2161	0	660.312	4.3		Acetylation (K)	HCD
M1_3_RB1_1_8834.d	N(+.98)PVLKRL	F2:25404	7	94	94	7	420.77	0.7903-0.8069	1200.6	839.523	4		Deamidation (NQ)	HCD
M1_3_RB1_1_8834.d	PPPPPPP	F2:23244	7	94	94	7	698.386	1.1972-1.2134	0	697.38	-1.7	A0A8C4MTS8:A0A8C4LUM8:A0A8C4KXX4:A0A8C4M9E1:A0A8C4M3B4:A0A8C4LMY3:A0A8C4LNL1:A0A8C4LAX9:A0A8C4L5S0:A0A8C4LV13:A0A8C4LX24:A0A8C4LYB5:A0A8C4MZE5:A0A8C4LIZ6:A0A8C4LIA5:A0A8C4MVP1:A0A8C4MF50:A0A8C4MIB0:A0A8C4M7H9:A0A8C4MP75:A0A8C4L1M4:A0A8C4L0M4:A0A8C4MG23:A0A8C4MAY6:A0A8C4LUX7:A0A8C4NB56:A0A8C4MTY2:A0A8C4N2U9:A0A8C4LIL0:A0A8C4LI36:A0A8C4LI35:A0A8C4MLD5:A0A8C4MJU3:A0A8C4MMK2:A0A8C4PSM7:A0A8C4MLT9:A0A…		HCD
M1_3_RB1_1_8834.d	PPPPPPP	F2:24899	7	94	94	7	698.384	1.2195-1.2357	0	697.38	-4.2	A0A8C4MTS8:A0A8C4LUM8:A0A8C4KXX4:A0A8C4M9E1:A0A8C4M3B4:A0A8C4LMY3:A0A8C4LNL1:A0A8C4LAX9:A0A8C4L5S0:A0A8C4LV13:A0A8C4LX24:A0A8C4LYB5:A0A8C4MZE5:A0A8C4LIZ6:A0A8C4LIA5:A0A8C4MVP1:A0A8C4MF50:A0A8C4MIB0:A0A8C4M7H9:A0A8C4MP75:A0A8C4L1M4:A0A8C4L0M4:A0A8C4MG23:A0A8C4MAY6:A0A8C4LUX7:A0A8C4NB56:A0A8C4MTY2:A0A8C4N2U9:A0A8C4LIL0:A0A8C4LI36:A0A8C4LI35:A0A8C4MLD5:A0A8C4MJU3:A0A8C4MMK2:A0A8C4PSM7:A0A8C4MLT9:A0A…		HCD
M2-1_RB1_1_8659.d	EVQ(+.98)DPKSKKDA	F6:1440	11	94	94	11	623.321	0.9091-0.9256	1945.2	1244.62	1.9		Deamidation (NQ)	HCD
M1_3_RB1_1_8834.d	M(+15.99)PFLK	F2:23957	5	94	94	5	651.356	1.2107-1.2270	0	650.346	4.1		Oxidation (M)	HCD
M2-1_RB1_1_8659.d	DN(+.98)GLSAAARKQ	F6:8940	11	94	94	11	566.292	0.8967-0.9132	2189.7	1130.57	0.6	A0A8C4MP75:A0A8C4LZI7:A0A8C4LSX9:A0A8C4LQG6:A0A8C4LSB3:A0A8C4LRV3	Deamidation (NQ)	HCD
M1_RB1_1_8657.d	EKVQKF	F3:8912	6	94	94	6	389.726	0.7452-0.7619	51430	777.438	-0.9	D2EC27		HCD
M2-1_RB1_1_8659.d	DDKLLK	F6:8064	6	94	94	6	366.219	0.7480-0.7647	2006.8	730.423	0.7			HCD
M1_RB1_1_8657.d	KLHCLR	F3:23261	6	94	94	6	385.23	0.7376-0.7542	0	768.443	3.7			HCD
M2-1_2_RB1_1_8837.d	APARPPPGGPGASAPLPR	F4:19796	18	94	94	18	555.978	0.8491-0.8657	9334.5	1664.91	0.7	A0A8C4N5V1:A0A8C4N1C2:A0A8C4PJ30:A0A8C4M4P4:A0A8C4N8C5:A0A8C4LUX7:A0A8C4M1X1:A0A8C4LF53:A0A8C4LF38:A0A8C4LBJ9:A0A8C4LGH9:A0A8C4L2K7:A0A8C4PQY9		HCD
M2-1_RB1_1_8659.d	HESTNLS(+79.97)QEKYK	F6:8312	12	94	94	12	772.343	1.0407-1.0571	408540	1542.67	0.5	B7VGF9:C1L3G3:A0A8C4MHP1:A0A8C4MKT7:A0A8C4MCS3	Phosphorylation (STY)	HCD
M1_3_RB1_1_8834.d	DALKKKL	F2:8080	7	94	94	7	408.273	0.7841-0.8007	0	814.528	4.5	A0A8C4M2L2:A0A8C4LZ68:A0A8C4L9L1:A0A8C4L4M7:A0A8C4MGK0:A0A8C4M8S2:A0A8C4MCI0:A0A8C4PQM9:A0A8C4LTK2:A0A8C4LCU6:A0A8C4M524:A0A8C4LLG0		HCD
M2-1_3_RB1_1_8839.d	PPLKLKP	F5:19985	7	94	94	7	396.772	0.7438-0.7605	159.84	791.527	3.2			HCD
M1_RB1_1_8657.d	TKELQ(+.98)	F3:9746	5	94	94	5	619.328	1.1897-1.2060	0	618.322	-2.1		Deamidation (NQ)	HCD
M1_3_RB1_1_8834.d	M(+42.01)(+15.99)ERAETLLR	F2:31124	9	94	94	9	588.81	0.9421-0.9586	7676.9	1175.6	6.7		Acetylation (N-term); Oxidation (M)	HCD
M1_3_RB1_1_8834.d	APARPPPGGPGALAPLPR	F2:36332	18	94	94	18	564.664	0.9496-0.9661	6969.8	1690.96	3.8	A0A8C4N5V1:A0A8C4N1C2:A0A8C4M4P4:A0A8C4N8C5:A0A8C4LUX7:A0A8C4MNZ6:A0A8C4MP05:A0A8C4M1X1:A0A8C4N3Z1:A0A8C4LF53:A0A8C4LF38:A0A8C4LBJ9:A0A8C4LGH9:A0A8C4PQY9		HCD
M1_2_RB1_1_8832.d	DLDDLK	F1:21451	6	94	94	6	718.361	1.2459-1.2621	0	717.354	-1.3	A0A8C4LKY4		HCD
M1_2_RB1_1_8832.d	HSDAVSLCVLKPD	F1:42032	13	94	94	13	692.353	0.9977-1.0141	2648.7	1382.69	4.2	A0A8C4LXL5		HCD
M1_2_RB1_1_8832.d	FPSVHPRF	F1:51994	8	94	94	8	493.765	0.8422-0.8588	0	985.513	1.8			HCD
M1_2_RB1_1_8832.d	SLTDKLELTKEK(+42.01)SLY	F1:41804	15	94	94	15	604.002	0.8843-0.9008	880.19	1808.98	4.2	A0A8C4LTE2:A0A8C4M6N0:A0A8C4PQ06:A0A8C4M9C8:A0A8C4M5V6:A0A8C4MUK2:A0A8C4KZW6	Acetylation (K)	HCD
M2-1_RB1_1_8659.d	HPELLQ	F6:15829	6	94	94	6	736.395	1.2695-1.2857	0	735.391	-4.5	P86272:C3W972:A0A8C4PJH0		HCD
M1_2_RB1_1_8832.d	TTKEEWE	F1:27115	7	94	94	7	461.712	0.7827-0.7993	248.43	921.408	1.3			HCD
M1_3_RB1_1_8834.d	M(+42.01)(+15.99)DKL	F2:18642	4	94	94	4	564.273	1.1443-1.1606	0	563.263	5.6		Acetylation (N-term); Oxidation (M)	HCD
M1_2_RB1_1_8832.d	DEDGKKF	F1:6648	7	94	94	7	838.394	1.2776-1.2938	0	837.387	-0.7	A0A8C4LPY8		HCD
M2-1_3_RB1_1_8839.d	DDGEYR	F5:1962	6	94	94	6	754.301	1.2378-1.2540	0	753.293	1.3	A0A8C4LD23		HCD
M2-1_2_RB1_1_8837.d	EEPKKV	F4:1328	6	94	94	6	365.212	0.7216-0.7383	233.61	728.407	3.6			HCD
M1_3_RB1_1_8834.d	LPKLQKL	F2:28034	7	94	94	7	420.289	0.7848-0.8014	211.86	838.564	-1.3	A0A8C4KYA3:A0A8C4PJR0:A0A8C4MRM8		HCD
M2-1_3_RB1_1_8839.d	TK(+42.01)GPDLLPK	F5:23173	9	94	94	9	505.8	0.8263-0.8429	54355	1009.58	4.6	A0A8C4LNY7:A0A8C4LWU9:A0A8C4LPU7	Acetylation (K)	HCD
M1_RB1_1_8657.d	RAETLLR	F3:14248	7	94	94	7	429.761	0.8014-0.8180	1810	857.508	-0.5			HCD
M2-1_RB1_1_8659.d	LPKRKV	F6:2189	6	94	94	6	370.762	0.7827-0.7993	4200	739.507	3.3	D2EC27		HCD
M2-1_2_RB1_1_8837.d	HESTNLSQEYK	F4:10785	11	94	94	11	668.315	0.9270-0.9435	16876	1334.61	3.4	C1L3G3		HCD
M1_3_RB1_1_8834.d	HSDAVSLCVLKPDPSQK	F2:35875	17	94	94	17	608.651	0.9001-0.9167	53829	1822.92	3.7	A0A8C4LXL5:A0A8C4MLW6		HCD
M2-1_3_RB1_1_8839.d	LPPPP	F5:21032	5	94	94	5	520.312	1.0414-1.0578	0	519.306	-2.7			HCD
M1_3_RB1_1_8834.d	M(+42.01)(+15.99)ERAETLLR	F2:31079	9	94	94	9	588.81	0.9414-0.9579	7676.9	1175.6	6.7		Acetylation (N-term); Oxidation (M)	HCD
M2-1_3_RB1_1_8839.d	WPELE	F5:29870	5	94	94	5	673.323	1.1897-1.2060	0	672.312	5.4			HCD
M2-1_RB1_1_8659.d	HESTNLS(+79.97)QEKYK	F6:8223	12	94	94	12	772.343	1.0660-1.0824	408540	1542.67	0.5	B7VGF9:C1L3G3:A0A8C4MHP1:A0A8C4MKT7:A0A8C4MCS3	Phosphorylation (STY)	HCD
M1_3_RB1_1_8834.d	VRPVKPVKV	F2:25607	9	94	94	9	511.348	0.8457-0.8622	0	1020.68	0.2	A0A8C4LYI0		HCD
M1_2_RB1_1_8832.d	LPKRKV	F1:4104	6	94	94	6	370.763	0.7647-0.7813	18913	739.507	6.5	D2EC27		HCD
M2-1_2_RB1_1_8837.d	EVDKKL	F4:4668	6	94	94	6	366.221	0.7383-0.7549	13286	730.423	5.7	A0A8C4LD25		HCD
M2-1_3_RB1_1_8839.d	TPVTKLE	F5:14386	7	94	94	7	394.229	0.7799-0.7965	0	786.449	-6	A0A8C4LHK7		HCD
M1_RB1_1_8657.d	EVQNQQ(+.98)QPTEQ	F3:9676	11	94	94	11	665.296	0.9160-0.9325	2188.4	1328.58	-5.1	A0A8C4PJH0:A0A8C4MEJ9:A0A8C4M6Y4:A0A8C4MQW4:A0A8C4PU43:A0A8C4LD35	Deamidation (NQ)	HCD
M1_RB1_1_8657.d	QEEKKKKKL	F3:1488	9	94	94	9	579.864	0.9098-0.9263	2418.7	1157.71	0.6	A0A8C4LPN9:A0A8C4MD96:A0A8C4MLY4:A0A8C4MMG4:A0A8C4MP75:A0A8C4L946:A0A8C4LA58:A0A8C4L2G1:A0A8C4L6W9:A0A8C4MGD3:A0A8C4LAY0:A0A8C4LRW5:A0A8C4KUB0:A0A8C4PS52:A0A8C4L727:A0A8C4L5Z6:A0A8C4M1Y3:A0A8C4M2V3:A0A8C4M099:A0A8C4M5N7:A0A8C4LZT9:A0A8C4KQK5:A0A8C4PL28:A0A8C4LLN8:A0A8C4LJP8:A0A8C4MQT7:A0A8C4MPM2:A0A8C4MNE2:A0A8C4MD75:A0A8C4PRJ1:A0A8C4MEB5:A0A8C4MCX6:A0A8C4PRX7:A0A8C4PGF3:A0A8C4LZB6:A0A8C4MPW1:A0A…		HCD
M1_RB1_1_8657.d	EPVKKV	F3:4319	6	94	94	6	350.225	0.7271-0.7438	3586.8	698.433	3.7	A0A8C4M5J3:A0A8C4M6R7:A0A8C4KZL8		HCD
M1_3_RB1_1_8834.d	VM(+15.99)PFLK	F2:31515	6	94	94	6	750.422	1.2830-1.2991	0	749.415	0.1	D2EC27	Oxidation (M)	HCD
M1_2_RB1_1_8832.d	APARPPPGGPGALAPLRP	F1:36505	18	94	94	18	564.665	0.8774-0.8939	40235	1690.96	6	A0A8C4N5V1:A0A8C4N1C2:A0A8C4M4P4:A0A8C4N8C5:A0A8C4LUX7:A0A8C4MNZ6:A0A8C4MP05:A0A8C4M1X1:A0A8C4N3Z1:A0A8C4LF53:A0A8C4LF38:A0A8C4LBJ9:A0A8C4LGH9:A0A8C4PQY9		HCD
M2-1_3_RB1_1_8839.d	DGSKLKL	F5:17372	7	94	94	7	380.732	0.7542-0.7709	0	759.449	-0.6	A0A8C4PKP7		HCD
M2-1_3_RB1_1_8839.d	EEVPKKV	F5:5139	7	94	94	7	414.747	0.7487-0.7653	15633	827.475	3.8			HCD
M1_RB1_1_8657.d	ELVKT	F3:11484	5	94	94	5	589.358	1.1938-1.2100	0	588.348	4.2			HCD
M1_RB1_1_8657.d	DRFKFG	F3:25488	6	94	94	6	385.204	0.7577-0.7744	2442.8	768.392	2.7			HCD
M1_3_RB1_1_8834.d	HPHLF	F2:23693	5	94	94	5	325.674	0.7237-0.7403	0	649.334	0.5			HCD
M1_3_RB1_1_8834.d	NLYYKY	F2:17808	6	94	94	6	432.217	0.7702-0.7868	1117.7	862.423	-3.4			HCD
M1_3_RB1_1_8834.d	HSDAVSLFVGKPDPSQK	F2:37227	17	94	94	17	604.651	0.9015-0.9180	12171	1810.92	5.3	A0A8C4LXL5:A0A8C4MXS9		HCD
M1_2_RB1_1_8832.d	VDTQAKD	F1:2803	7	94	94	7	776.376	1.2749-1.2911	0	775.371	-2.6	P0DUB1:A0A8C4L7D7:A0A8C4PHR9		HCD
M2-1_3_RB1_1_8839.d	A(+42.01)EDLK	F5:12876	5	94	94	5	617.317	1.1606-1.1769	0	616.307	5.4		Acetylation (N-term)	HCD
M1_RB1_1_8657.d	LPLL	F3:51312	4	94	94	4	455.322	1.0380-1.0544	0	454.315	-1.4			HCD
M1_3_RB1_1_8834.d	VTPVTKLE	F2:24628	8	94	94	8	443.767	0.7813-0.7979	1565.6	885.517	3.7	A0A8C4LHK7		HCD
M1_RB1_1_8657.d	DKLFRS	F3:14963	6	94	94	6	383.215	0.7549-0.7716	4040.5	764.418	-3.3			HCD
M1_RB1_1_8657.d	SPKVRKV	F3:3574	7	94	94	7	407.271	0.7806-0.7972	921.61	812.523	4.2	A0A8C4MQT7:A0A8C4MPM2		HCD
M1_RB1_1_8657.d	PPPYK	F3:19682	5	94	94	5	601.336	1.1368-1.1531	0	600.327	2.8			HCD
M1_RB1_1_8657.d	M(+15.99)PFLK	F3:23266	5	94	94	5	651.353	1.2175-1.2337	0	650.346	-0.7		Oxidation (M)	HCD
M2-1_3_RB1_1_8839.d	DLKQEKP	F5:3006	7	94	94	7	429.242	0.8394-0.8560	1422.5	856.465	5	A0A8C4N279:A0A8C4L6A6:A0A8C4PSY6:A0A8C4MMW0		HCD
M1_3_RB1_1_8834.d	MPFLK	F2:38859	5	94	94	5	318.184	0.7306-0.7473	20461	634.351	4.2			HCD
M1_3_RB1_1_8834.d	PPPPPP	F2:29896	6	94	94	6	601.335	1.1429-1.1592	0	600.327	1.5	A0A8C4MTS8:A0A8C4LUM8:A0A8C4KXX4:A0A8C4M9E1:A0A8C4M3B4:A0A8C4LMY3:A0A8C4LNL1:A0A8C4LAX9:A0A8C4L5S0:A0A8C4LV13:A0A8C4LX24:A0A8C4LYB5:A0A8C4MZE5:A0A8C4LIZ6:A0A8C4LIA5:A0A8C4MVP1:A0A8C4MF50:A0A8C4MIB0:A0A8C4M7H9:A0A8C4MP75:A0A8C4L1M4:A0A8C4L0M4:A0A8C4MG23:A0A8C4MAY6:A0A8C4LUX7:A0A8C4NB56:A0A8C4MTY2:A0A8C4N2U9:A0A8C4LIL0:A0A8C4LI36:A0A8C4LI35:A0A8C4MLD5:A0A8C4MJU3:A0A8C4MMK2:A0A8C4PSM7:A0A8C4MLT9:A0A…		HCD
M1_2_RB1_1_8832.d	SVRLED	F1:15280	6	94	94	6	359.692	0.7160-0.7327	1005.7	717.366	4	A0A8C4LD23		HCD
M1_2_RB1_1_8832.d	LPDLFPADFK	F1:56170	10	94	94	10	581.813	0.8877-0.9043	25117	1161.61	3.8			HCD
M1_3_RB1_1_8834.d	LPLLK	F2:30866	5	94	94	5	583.422	1.1762-1.1924	0	582.41	6.9			HCD
M2-1_2_RB1_1_8837.d	SEEKVQKF	F4:9047	8	94	94	8	497.765	0.8215-0.8381	1301.4	993.513	2.4	D2EC27:A0A8C4KT44:A0A8C4MNE2:A0A8C4MD75:A0A8C4PRJ1:A0A8C4MEB5:A0A8C4MCX6:A0A8C4PRX7		HCD
M2-1_2_RB1_1_8837.d	LETKEEKL	F4:13054	8	94	94	8	495.281	0.8318-0.8484	33250	988.544	3.2	A0A8C4M7I4		HCD
M1_3_RB1_1_8834.d	DRLETR	F2:3162	6	94	94	6	395.212	0.7522-0.7688	922.01	788.414	-5.8	A0A8C4LTK2:A0A8C4L9U6		HCD
M1_2_RB1_1_8832.d	DPVKKL	F1:10246	6	94	94	6	350.225	0.7070-0.7237	481.63	698.433	5.3	A0A8C4M5J3:A0A8C4M6R7		HCD
M1_2_RB1_1_8832.d	DKLFRS	F1:15112	6	94	94	6	383.218	0.7459-0.7626	4295.8	764.418	5.1			HCD
M1_2_RB1_1_8832.d	LGADKYF	F1:34257	7	94	94	7	407.211	0.7667-0.7834	4023.6	812.407	1.8	A0A8C4LEB1		HCD
M2-1_2_RB1_1_8837.d	PPPVDKP	F4:9456	7	94	94	7	375.214	0.7299-0.7466	273.71	748.412	1.5			HCD
M2-1_3_RB1_1_8839.d	HESTNLS(+79.97)EEKYK	F5:9651	12	94	94	12	772.837	1.0435-1.0599	9975.6	1543.66	3	C1L3G3:A0A8C4LTE2	Phosphorylation (STY)	HCD
M1_2_RB1_1_8832.d	RLTDRF	F1:21275	6	94	94	6	404.228	0.7785-0.7952	215.48	806.44	0.7			HCD
M2-1_2_RB1_1_8837.d	KHESTNLSQEKY	F4:7430	12	94	94	12	732.363	1.0018-1.0182	2818.2	1462.71	3.8	B7VGF9:C1L3G3		HCD
M1_2_RB1_1_8832.d	N(+.98)PVLKRL	F1:25410	7	94	94	7	420.772	0.7903-0.8069	1367.8	839.523	6.8		Deamidation (NQ)	HCD
M1_3_RB1_1_8834.d	ETLLR	F2:17842	5	94	94	5	631.378	1.1796-1.1958	0	630.37	1.4			HCD
M1_2_RB1_1_8832.d	EDEVKKL	F1:12022	7	94	94	7	430.741	0.7688-0.7855	128	859.465	3.5	A0A8C4KSW5:A0A8C4KST4:A0A8C4KUG4		HCD
M1_RB1_1_8657.d	VM(+15.99)PFLK	F3:31225	6	94	94	6	750.419	1.2823-1.2985	0	749.415	-4	D2EC27	Oxidation (M)	HCD
M1_3_RB1_1_8834.d	RLEDRA	F2:3970	6	94	94	6	380.209	0.7584-0.7751	0	758.403	0.7			HCD
M1_RB1_1_8657.d	HQHQTTMDPQSHKVLL	F3:23828	16	94	94	16	633.988	0.9579-0.9744	2145.9	1898.94	0.2	B7VGF9:A0A8C4MBA7		HCD
M2-1_2_RB1_1_8837.d	DPQSHKVL	F4:9666	8	94	94	8	462.253	0.7785-0.7952	1482.4	922.487	4.6	A0A8C4MBA7		HCD
M1_3_RB1_1_8834.d	LPAHVKDRQL	F2:16013	10	94	94	10	392.899	0.7084-0.7251	773.9	1175.68	-2.4			HCD
M1_RB1_1_8657.d	LPLSPM(+15.99)	F3:31210	6	94	94	6	673.36	1.2445-1.2607	0	672.352	1.4	A0A8C4LD23	Oxidation (M)	HCD
M2-1_RB1_1_8659.d	HESTNLSQEK	F6:3363	10	94	94	10	586.783	0.8905-0.9070	11585	1171.55	3.8	B7VGF9:C1L3G3		HCD
M1_3_RB1_1_8834.d	PPPPPP	F2:19888	6	94	94	6	601.333	1.1402-1.1565	0	600.327	-1.5	A0A8C4MTS8:A0A8C4LUM8:A0A8C4KXX4:A0A8C4M9E1:A0A8C4M3B4:A0A8C4LMY3:A0A8C4LNL1:A0A8C4LAX9:A0A8C4L5S0:A0A8C4LV13:A0A8C4LX24:A0A8C4LYB5:A0A8C4MZE5:A0A8C4LIZ6:A0A8C4LIA5:A0A8C4MVP1:A0A8C4MF50:A0A8C4MIB0:A0A8C4M7H9:A0A8C4MP75:A0A8C4L1M4:A0A8C4L0M4:A0A8C4MG23:A0A8C4MAY6:A0A8C4LUX7:A0A8C4NB56:A0A8C4MTY2:A0A8C4N2U9:A0A8C4LIL0:A0A8C4LI36:A0A8C4LI35:A0A8C4MLD5:A0A8C4MJU3:A0A8C4MMK2:A0A8C4PSM7:A0A8C4MLT9:A0A…		HCD
M2-1_3_RB1_1_8839.d	HESTNLS(+79.97)QEKYK	F5:8228	12	94	94	12	772.345	1.0476-1.0640	390870	1542.67	2.2	B7VGF9:C1L3G3:A0A8C4MHP1:A0A8C4MKT7:A0A8C4MCS3	Phosphorylation (STY)	HCD
M2-1_2_RB1_1_8837.d	PPPPPP	F4:12608	6	94	94	6	601.335	1.1348-1.1511	0	600.327	1.8	A0A8C4MTS8:A0A8C4LUM8:A0A8C4KXX4:A0A8C4M9E1:A0A8C4M3B4:A0A8C4LMY3:A0A8C4LNL1:A0A8C4LAX9:A0A8C4L5S0:A0A8C4LV13:A0A8C4LX24:A0A8C4LYB5:A0A8C4MZE5:A0A8C4LIZ6:A0A8C4LIA5:A0A8C4MVP1:A0A8C4MF50:A0A8C4MIB0:A0A8C4M7H9:A0A8C4MP75:A0A8C4L1M4:A0A8C4L0M4:A0A8C4MG23:A0A8C4MAY6:A0A8C4LUX7:A0A8C4NB56:A0A8C4MTY2:A0A8C4N2U9:A0A8C4LIL0:A0A8C4LI36:A0A8C4LI35:A0A8C4MLD5:A0A8C4MJU3:A0A8C4MMK2:A0A8C4PSM7:A0A8C4MLT9:A0A…		HCD
M1_2_RB1_1_8832.d	LPLLQK	F1:33175	6	94	94	6	356.242	0.7355-0.7522	59040	710.469	0.4	A0A8C4MSR3:A0A8C4MXA0		HCD
M1_RB1_1_8657.d	DPQSHKV	F3:3196	7	94	94	7	405.71	0.7529-0.7695	368.12	809.403	3			HCD
M1_3_RB1_1_8834.d	PGASAPLRP	F2:24898	9	94	94	9	433.248	0.7640-0.7806	5319.5	864.482	0.2	A0A8C4PJ30		HCD
M1_2_RB1_1_8832.d	LPVLR	F1:28665	5	94	94	5	597.412	1.1782-1.1945	0	596.401	6.9			HCD
M2-1_2_RB1_1_8837.d	EPPYS	F4:9989	5	94	94	5	592.26	1.1137-1.1300	0	591.254	-2.8			HCD
M1_2_RB1_1_8832.d	DGSKLKL	F1:21697	7	94	94	7	380.731	0.7563-0.7730	0	759.449	-2.3	A0A8C4PKP7		HCD
M1_RB1_1_8657.d	NYLGADKYF	F3:41480	9	94	94	9	545.763	0.8601-0.8767	764.99	1089.51	-0.8	A0A8C4LEB1:A0A8C4MGQ5		HCD
M2-1_2_RB1_1_8837.d	DDKPVKL	F4:14535	7	94	94	7	407.739	0.7431-0.7598	3979.9	813.46	5.2	A0A8C4MPJ4		HCD
M1_RB1_1_8657.d	PNHRFPR	F3:4963	7	94	94	7	462.253	0.8007-0.8173	0	922.489	3.1			HCD
M2-1_RB1_1_8659.d	DELKKV	F6:5778	6	94	94	6	366.219	0.7292-0.7459	2028.2	730.423	0.6	A0A8C4MKB7		HCD
M1_RB1_1_8657.d	DPDKVF	F3:27388	6	94	94	6	720.356	1.2344-1.2506	0	719.349	0.2			HCD
M1_3_RB1_1_8834.d	DGN(+.98)KPVRM	F2:11889	8	94	94	8	459.231	0.7799-0.7965	3222.4	916.444	3.8		Deamidation (NQ)	HCD
M1_2_RB1_1_8832.d	APRAPPPGGPGASAPLPR	F1:25408	18	94	94	18	555.98	0.8546-0.8712	11897	1664.91	4.3	A0A8C4N5V1:A0A8C4N1C2:A0A8C4PJ30:A0A8C4M4P4:A0A8C4N8C5:A0A8C4LBJ9:A0A8C4LGH9:A0A8C4L2K7		HCD
M1_RB1_1_8657.d	TPVTKL	F3:19754	6	94	94	6	658.41	1.2182-1.2344	0	657.406	-5.5	A0A8C4LHK7		HCD
M2-1_3_RB1_1_8839.d	LPPPP	F5:21101	5	94	94	5	520.315	1.0360-1.0524	0	519.306	4.1			HCD
M2-1_3_RB1_1_8839.d	HESTNLS(+79.97)QEKYK	F5:8242	12	94	94	12	772.345	1.0401-1.0565	390870	1542.67	2.2	B7VGF9:C1L3G3:A0A8C4MHP1:A0A8C4MKT7:A0A8C4MCS3	Phosphorylation (STY)	HCD
M2-1_RB1_1_8659.d	DGHVKV	F6:4821	6	94	94	6	327.683	0.7209-0.7376	993.9	653.35	1.2			HCD
M1_2_RB1_1_8832.d	DVLLKKL	F1:30968	7	94	94	7	414.78	0.7785-0.7952	0	827.548	-2.2	A0A8C4LCR7:A0A8C4LIJ3		HCD
M1_RB1_1_8657.d	PPLKLP	F3:39472	6	94	94	6	332.724	0.7445-0.7612	2905.7	663.432	1.3	A0A8C4MEG2:A0A8C4LZZ3:A0A8C4MPW1:A0A8C4MUI6		HCD
M1_2_RB1_1_8832.d	M(+42.01)(+15.99)ERAETLLR	F1:31093	9	94	94	9	588.809	0.9407-0.9572	7700.4	1175.6	5.3		Acetylation (N-term); Oxidation (M)	HCD
M1_3_RB1_1_8834.d	N(+42.01)PPKAPSKKE	F2:7435	10	94	94	10	569.319	0.8608-0.8774	2427.5	1136.62	4.8	A0A8C4M2F8:A0A8C4PP55:A0A8C4M526:A0A8C4PSX3	Acetylation (N-term)	HCD
M1_2_RB1_1_8832.d	LDKVKRL	F1:17001	7	94	94	7	436.29	0.7993-0.8159	262.99	870.565	0.4			HCD
M1_RB1_1_8657.d	WPELE	F3:46809	5	94	94	5	673.323	1.2114-1.2276	0	672.312	6.4			HCD
M2-1_RB1_1_8659.d	DEVRKL	F6:8156	6	94	94	6	380.224	0.7535-0.7702	0	758.429	6.3	A0A8C4LBX7		HCD
M2-1_3_RB1_1_8839.d	HESTNLS(+79.97)QEKYK	F5:8483	12	94	94	12	772.345	1.0448-1.0612	390870	1542.67	2.2	B7VGF9:C1L3G3:A0A8C4MHP1:A0A8C4MKT7:A0A8C4MCS3	Phosphorylation (STY)	HCD
M2-1_2_RB1_1_8837.d	LPVHLL	F4:29457	6	94	94	6	346.229	0.7466-0.7633	701.29	690.443	1.7	D2EC27		HCD
M1_3_RB1_1_8834.d	TLTGVHM(+15.99)	F2:11878	7	94	94	7	774.386	1.2735-1.2897	0	773.374	6.5		Oxidation (M)	HCD
M1_RB1_1_8657.d	ELPKKTV	F3:9359	7	94	94	7	407.757	0.7820-0.7986	6307.6	813.496	3.4	B7VGF9		HCD
M1_RB1_1_8657.d	A(+42.01)PPPDELVKKL	F3:49587	11	94	94	11	624.863	0.9428-0.9593	4395.2	1247.71	-1	A0A8C4L9Z3:A0A8C4LBK0:A0A8C4LEL1:A0A8C4LGW5:A0A8C4LB42:A0A8C4LJD7:A0A8C4LKU6	Acetylation (N-term)	HCD
M2-1_2_RB1_1_8837.d	KGNLEYK	F4:4794	7	94	94	7	426.236	0.7896-0.8062	2303.3	850.455	4.1			HCD
M1_RB1_1_8657.d	PPLKLP	F3:39406	6	94	94	6	332.725	0.7653-0.7820	0	663.432	5.9	A0A8C4MEG2:A0A8C4LZZ3:A0A8C4MPW1:A0A8C4MUI6		HCD
M2-1_RB1_1_8659.d	HESTNLYYKY	F6:13305	10	94	94	10	659.309	0.9400-0.9565	13077	1316.6	0.5			HCD
M2-1_3_RB1_1_8839.d	DDERKL	F5:4089	6	94	94	6	388.202	0.7445-0.7612	11470	774.387	4.3	A0A8C4MKZ0		HCD
M1_RB1_1_8657.d	DQDPLTKT	F3:14501	8	94	94	8	459.233	0.7979-0.8145	2098.2	916.45	0.5	A0A8C4KZN3:A0A8C4L2D4		HCD
M1_3_RB1_1_8834.d	DPATQPLVPVHNPVLN	F2:47999	16	94	94	16	855.968	1.1164-1.1327	50206	1709.91	6.8	D2EC27		HCD
M1_3_RB1_1_8834.d	KGNLEYKEVVPLNTEK	F2:31441	16	94	94	16	621.009	0.8802-0.8967	5855.3	1860	3.6	P86272:C3W972		HCD
M1_3_RB1_1_8834.d	PQSHKVLL	F2:20760	8	94	94	8	461.281	0.8215-0.8381	0	920.544	4	A0A8C4MBA7		HCD
M1_2_RB1_1_8832.d	STPTLEA	F1:27248	7	94	94	7	718.366	1.2276-1.2438	0	717.355	6.4			HCD
M2-1_2_RB1_1_8837.d	ELEELH	F4:16058	6	94	94	6	769.373	1.2756-1.2917	0	768.365	1			HCD
M1_3_RB1_1_8834.d	YLPRLK	F2:23569	6	94	94	6	395.252	0.7653-0.7820	1439.9	788.491	-2.9	A0A8C4M8M6		HCD
M1_3_RB1_1_8834.d	APARPPPGGPGALAPLPR	F2:36410	18	94	94	18	564.663	0.8042-0.8208	8412.2	1690.96	3.1	A0A8C4N5V1:A0A8C4N1C2:A0A8C4M4P4:A0A8C4N8C5:A0A8C4LUX7:A0A8C4MNZ6:A0A8C4MP05:A0A8C4M1X1:A0A8C4N3Z1:A0A8C4LF53:A0A8C4LF38:A0A8C4LBJ9:A0A8C4LGH9:A0A8C4PQY9		HCD
M1_2_RB1_1_8832.d	DHTTNLS(+79.97)QEKYK	F1:10924	12	94	94	12	515.232	0.8242-0.8408	167750	1542.67	2.5	B7VGF9:C1L3G3:A0A8C4MHP1:A0A8C4MKT7:A0A8C4MCS3	Phosphorylation (STY)	HCD
M1_2_RB1_1_8832.d	EDGPKFL	F1:38379	7	94	94	7	403.208	0.7383-0.7549	1189.7	804.402	-1	A0A8C4L5X9		HCD
M2-1_3_RB1_1_8839.d	DKLEE	F5:4186	5	94	94	5	633.312	1.1809-1.1972	0	632.302	4.2			HCD
M1_3_RB1_1_8834.d	EANYLGAYRSFH	F2:35873	12	94	94	12	714.341	0.9956-1.0120	373.11	1426.66	2.5			HCD
M2-1_3_RB1_1_8839.d	DLDDKLLK	F5:20848	8	94	94	8	480.274	0.8381-0.8546	1006.9	958.533	0.5			HCD
M1_2_RB1_1_8832.d	GPPPPPP	F1:19840	7	94	94	7	658.354	1.1850-1.2012	0	657.349	-2.5	A0A8C4MTS8:A0A8C4LUM8:A0A8C4KXX4:A0A8C4M9E1:A0A8C4M3B4:A0A8C4LMY3:A0A8C4LNL1:A0A8C4LAX9:A0A8C4L5S0:A0A8C4LV13:A0A8C4M4P4:A0A8C4LX24:A0A8C4LYB5:A0A8C4MZE5:A0A8C4LIZ6:A0A8C4LIA5:A0A8C4MVP1:A0A8C4MF50:A0A8C4MIB0:A0A8C4M7H9:A0A8C4MP75:A0A8C4L1M4:A0A8C4L0M4:A0A8C4MG23:A0A8C4MAY6:A0A8C4LUX7:A0A8C4NB56:A0A8C4MTY2:A0A8C4N2U9:A0A8C4LIL0:A0A8C4LI36:A0A8C4LI35:A0A8C4MLD5:A0A8C4MJU3:A0A8C4MMK2:A0A8C4PSM7:A0A…		HCD
M2-1_2_RB1_1_8837.d	DEESRAFKQ	F4:8049	9	94	94	9	555.263	0.8629-0.8795	568.14	1108.51	-2.6			HCD
M1_2_RB1_1_8832.d	AETLLR	F1:20798	6	94	94	6	702.416	1.2418-1.2580	0	701.407	2			HCD
M1_2_RB1_1_8832.d	AHVPDQ(+.98)LVKKL	F1:50570	11	94	94	11	624.866	0.9338-0.9503	4255.9	1247.72	-5.2	A0A8C4L4D1:A0A8C4MMY3:A0A8C4KYR6:A0A8C4PFG6:A0A8C4KXU0:A0A8C4N2S5	Deamidation (NQ)	HCD
M1_RB1_1_8657.d	HSDAVSLAM(+15.99)LKPDPSQK	F3:30844	17	94	94	17	613.98	0.9153-0.9318	18277	1838.92	-1.5	A0A8C4LXL5:A0A8C4MLW6	Oxidation (M)	HCD
M1_RB1_1_8657.d	EEPFEQKKKP	F3:1552	10	94	94	10	420.556	0.7244-0.7410	0	1258.66	-6.7	A0A8C4PPH6:A0A8C4MGS3:A0A8C4MBW3:A0A8C4MFI5:A0A8C4MLN5:A0A8C4L992		HCD
M2-1_3_RB1_1_8839.d	EEKVQKF	F5:8794	7	94	94	7	454.249	0.7827-0.7993	4051.4	906.481	2.3	D2EC27:A0A8C4KT44:A0A8C4MNE2:A0A8C4MD75:A0A8C4PRJ1:A0A8C4MEB5:A0A8C4MCX6:A0A8C4PRX7		HCD
M2-1_RB1_1_8659.d	DDGGLGSKP	F6:10138	9	94	94	9	423.205	0.7605-0.7771	717.77	844.393	4.3	A0A8C4LUP4:A0A8C4LX95		HCD
M1_2_RB1_1_8832.d	SLSSKLR	F1:11402	7	94	94	7	395.745	0.7799-0.7965	5007.1	789.471	6.5	A0A8C4MSR3:A0A8C4N8C5:A0A8C4LSJ3:A0A8C4LU33		HCD
M1_2_RB1_1_8832.d	KHESTNLS(+79.97)QEKYK	F1:8360	13	94	94	13	557.931	0.8270-0.8436	92947	1670.77	2	B7VGF9:C1L3G3:A0A8C4MHP1:A0A8C4MKT7:A0A8C4MCS3	Phosphorylation (STY)	HCD
M2-1_RB1_1_8659.d	LQ(+.98)LTKEEKLYKL	F6:25327	12	94	94	12	502.964	0.8180-0.8346	952.19	1505.87	-0.9	A0A8C4M7I4:A0A8C4LTE2:A0A8C4LBN5	Deamidation (NQ)	HCD
M1_RB1_1_8657.d	LPQEV	F3:25677	5	94	94	5	585.328	1.1626-1.1789	0	584.317	6.9			HCD
M2-1_3_RB1_1_8839.d	LETKEEKL	F5:13186	8	94	94	8	495.281	0.8311-0.8477	33707	988.544	3.8	A0A8C4M7I4		HCD
M1_2_RB1_1_8832.d	LYLKQLEKEHH	F1:21654	11	94	94	11	479.935	0.7723-0.7889	318.5	1436.78	3.6	A0A8C4LQJ7:A0A8C4L4V2:A0A8C4L727:A0A8C4L5Z6:A0A8C4M686:A0A8C4MBZ9:A0A8C4MBY1:A0A8C4LTN8		HCD
M1_3_RB1_1_8834.d	HESTNLSQEKYK	F2:8777	12	94	94	12	488.578	0.7952-0.8118	21264	1462.71	4.3	B7VGF9:C1L3G3:A0A8C4MHP1:A0A8C4MKT7:A0A8C4MCS3		HCD
M1_2_RB1_1_8832.d	DRLEEK	F1:3152	6	94	94	6	395.208	0.7535-0.7702	718.5	788.403	-1.6	A0A8C4MSR3		HCD
M1_2_RB1_1_8832.d	DEDKYL	F1:23297	6	94	94	6	391.683	0.7563-0.7730	1508.6	781.349	1.8	A0A8C4LXL5		HCD
M2-1_3_RB1_1_8839.d	EPPYS	F5:10098	5	94	94	5	592.265	1.1151-1.1314	0	591.254	6.4			HCD
M2-1_3_RB1_1_8839.d	S(+79.97)EEKVQKF	F5:12706	8	94	94	8	537.75	0.8332-0.8498	24215	1073.48	6.5	D2EC27:A0A8C4KT44:A0A8C4MNE2:A0A8C4MD75:A0A8C4PRJ1:A0A8C4MEB5:A0A8C4MCX6:A0A8C4PRX7	Phosphorylation (STY)	HCD
M1_3_RB1_1_8834.d	EVDKKL	F2:7381	6	94	94	6	366.219	0.7390-0.7556	1412.7	730.423	2.6	A0A8C4LD25		HCD
M1_2_RB1_1_8832.d	APPVPRP	F1:15957	7	94	94	7	367.223	0.7841-0.8007	14523	732.428	4			HCD
M1_3_RB1_1_8834.d	LPPPKY	F2:29076	6	94	94	6	714.417	1.2438-1.2601	0	713.411	-2.3			HCD
M1_2_RB1_1_8832.d	KPKKL	F1:1469	5	94	94	5	613.442	1.1952-1.2114	0	612.432	4.6			HCD
M2-1_2_RB1_1_8837.d	DALKKKL	F4:5338	7	94	94	7	408.273	0.7744-0.7910	244.64	814.528	4.2	A0A8C4M2L2:A0A8C4LZ68:A0A8C4L9L1:A0A8C4L4M7:A0A8C4MGK0:A0A8C4M8S2:A0A8C4MCI0:A0A8C4PQM9:A0A8C4LTK2:A0A8C4LCU6:A0A8C4M524:A0A8C4LLG0		HCD
M2-1_2_RB1_1_8837.d	APARPPPGGPGASAPLPR	F4:19736	18	94	94	18	555.978	0.8477-0.8643	9334.5	1664.91	0.7	A0A8C4N5V1:A0A8C4N1C2:A0A8C4PJ30:A0A8C4M4P4:A0A8C4N8C5:A0A8C4LUX7:A0A8C4M1X1:A0A8C4LF53:A0A8C4LF38:A0A8C4LBJ9:A0A8C4LGH9:A0A8C4L2K7:A0A8C4PQY9		HCD
M1_RB1_1_8657.d	EKPPP	F3:6892	5	94	94	5	567.312	1.1157-1.1321	0	566.306	-3.4			HCD
M2-1_RB1_1_8659.d	HESTNLSQEKYK	F6:6218	12	94	94	12	732.363	1.0223-1.0387	10238	1462.71	4.5	B7VGF9:C1L3G3:A0A8C4MHP1:A0A8C4MKT7:A0A8C4MCS3		HCD
M1_2_RB1_1_8832.d	PPLKLP	F1:40052	6	94	94	6	332.724	0.7522-0.7688	3143	663.432	2.1	A0A8C4MEG2:A0A8C4LZZ3:A0A8C4MPW1:A0A8C4MUI6		HCD
M2-1_2_RB1_1_8837.d	HESTNLS(+79.97)QEKYK	F4:8328	12	94	94	12	772.344	1.0544-1.0708	387980	1542.67	1.4	B7VGF9:C1L3G3:A0A8C4MHP1:A0A8C4MKT7:A0A8C4MCS3	Phosphorylation (STY)	HCD
M1_3_RB1_1_8834.d	A(+42.01)STGPTK	F2:6003	7	94	94	7	703.367	1.2337-1.2499	0	702.355	6.7		Acetylation (N-term)	HCD
M2-1_2_RB1_1_8837.d	HESTNLS(+79.97)QEKYK	F4:8129	12	94	94	12	772.344	1.0455-1.0619	387980	1542.67	1.4	B7VGF9:C1L3G3:A0A8C4MHP1:A0A8C4MKT7:A0A8C4MCS3	Phosphorylation (STY)	HCD
M1_3_RB1_1_8834.d	AVARNLT	F2:12157	7	94	94	7	372.722	0.7383-0.7549	3112.5	743.429	0.7			HCD
M1_2_RB1_1_8832.d	PPPPPP	F1:26290	6	94	94	6	601.338	1.1490-1.1653	0	600.327	5.9	A0A8C4MTS8:A0A8C4LUM8:A0A8C4KXX4:A0A8C4M9E1:A0A8C4M3B4:A0A8C4LMY3:A0A8C4LNL1:A0A8C4LAX9:A0A8C4L5S0:A0A8C4LV13:A0A8C4LX24:A0A8C4LYB5:A0A8C4MZE5:A0A8C4LIZ6:A0A8C4LIA5:A0A8C4MVP1:A0A8C4MF50:A0A8C4MIB0:A0A8C4M7H9:A0A8C4MP75:A0A8C4L1M4:A0A8C4L0M4:A0A8C4MG23:A0A8C4MAY6:A0A8C4LUX7:A0A8C4NB56:A0A8C4MTY2:A0A8C4N2U9:A0A8C4LIL0:A0A8C4LI36:A0A8C4LI35:A0A8C4MLD5:A0A8C4MJU3:A0A8C4MMK2:A0A8C4PSM7:A0A8C4MLT9:A0A…		HCD
M2-1_2_RB1_1_8837.d	Q(+.98)EDKAFKQ	F4:4531	8	93	93	8	497.747	0.8069-0.8235	1849	993.477	2.7		Deamidation (NQ)	HCD
M2-1_RB1_1_8659.d	DDLVSK	F6:8262	6	93	93	6	676.348	1.2128-1.2290	0	675.344	-4.3	A0A8C4MEK9:A0A8C4MQV9		HCD
M1_3_RB1_1_8834.d	EEKLYLK	F2:20920	7	93	93	7	461.767	0.8228-0.8394	0	921.517	3	A0A8C4MQW4:A0A8C4PU43		HCD
M1_3_RB1_1_8834.d	KHESTNLS(+79.97)QEKYK	F2:8382	13	93	93	13	836.395	1.0769-1.0933	35311	1670.77	5.2	B7VGF9:C1L3G3:A0A8C4MHP1:A0A8C4MKT7:A0A8C4MCS3	Phosphorylation (STY)	HCD
M2-1_2_RB1_1_8837.d	EDGHVKV	F4:7094	7	93	93	7	392.205	0.7070-0.7237	169.17	782.392	3.2			HCD
M2-1_2_RB1_1_8837.d	DDAGPDTKKA	F4:1814	10	93	93	10	509.248	0.8208-0.8374	616.31	1016.48	3.2			HCD
M2-1_2_RB1_1_8837.d	EDKPDM	F4:11769	6	93	93	6	734.304	1.2526-1.2688	0	733.295	1.9			HCD
M1_2_RB1_1_8832.d	SSKEKLLEELK	F1:27813	11	93	93	11	435.254	0.7570-0.7737	191.83	1302.74	0.9	A0A8C4LD23:A0A8C4MGS3:A0A8C4PJR0:A0A8C4M524:A0A8C4MDU2:A0A8C4KUH1:A0A8C4KVX9		HCD
M1_2_RB1_1_8832.d	LLEQ(+.98)LK	F1:31945	6	93	93	6	372.73	0.7737-0.7903	509.49	743.443	4.5	A0A8C4MGS3:A0A8C4KXU0:A0A8C4MAG6:A0A8C4M250:A0A8C4LFA4:A0A8C4LJQ2:A0A8C4LFL1:A0A8C4MEN5:A0A8C4MHT5	Deamidation (NQ)	HCD
M1_RB1_1_8657.d	DRLEEK	F3:3033	6	93	93	6	395.211	0.7633-0.7799	874.91	788.403	5.2	A0A8C4MSR3		HCD
M2-1_RB1_1_8659.d	DTDGVLKT	F6:15869	8	93	93	8	424.721	0.7688-0.7855	682.08	847.429	-1.2			HCD
M2-1_3_RB1_1_8839.d	DPNHFRPR	F5:6210	8	93	93	8	519.767	0.8436-0.8601	9152.5	1037.52	4.1	A0A8C4LEB1		HCD
M1_RB1_1_8657.d	DKLYKF	F3:32058	6	93	93	6	407.23	0.7647-0.7813	0	812.443	3.9			HCD
M1_3_RB1_1_8834.d	LTQSLK	F2:13561	6	93	93	6	689.421	1.2452-1.2614	0	688.412	2.6			HCD
M1_2_RB1_1_8832.d	KNTKEEKLYLK	F1:25299	11	93	93	11	465.271	0.7993-0.8159	8070.7	1392.8	-4.7	A0A8C4M7I4:A0A8C4MQW4:A0A8C4PU43		HCD
M1_3_RB1_1_8834.d	TN(+.98)GKKKL	F2:1541	7	93	93	7	395.245	0.7494-0.7660	0	788.476	-0.3		Deamidation (NQ)	HCD
M1_3_RB1_1_8834.d	EDKPDM	F2:14872	6	93	93	6	734.302	1.2493-1.2654	0	733.295	-0.8			HCD
M1_RB1_1_8657.d	DPATQPLVPVHNPVLN	F3:47338	16	93	93	16	855.966	1.1314-1.1477	54307	1709.91	4.8	D2EC27		HCD
M2-1_3_RB1_1_8839.d	HESTNLS(+79.97)QEKYK	F5:8173	12	93	93	12	772.345	1.0325-1.0489	9459	1542.67	2.4	B7VGF9:C1L3G3:A0A8C4MHP1:A0A8C4MKT7:A0A8C4MCS3	Phosphorylation (STY)	HCD
M2-1_2_RB1_1_8837.d	HESTNLYYKYK	F4:8135	11	93	93	11	482.572	0.8138-0.8304	21205	1444.7	-2.7			HCD
M1_2_RB1_1_8832.d	DELVKKL	F1:22755	7	93	93	7	422.762	0.7757-0.7924	336.62	843.506	4.2	A0A8C4L9Z3:A0A8C4LBK0:A0A8C4LEL1:A0A8C4LGW5:A0A8C4LB42:A0A8C4LJD7:A0A8C4LKU6		HCD
M1_RB1_1_8657.d	PNHFRPR	F3:18875	7	93	93	7	462.252	0.8298-0.8463	242.86	922.489	1.2	A0A8C4LEB1		HCD
M2-1_3_RB1_1_8839.d	ETLLR	F5:14163	5	93	93	5	631.381	1.1830-1.1992	0	630.37	5.8			HCD
M1_RB1_1_8657.d	A(+42.01)STGPTKRQTL	F3:17965	11	93	93	11	601.331	0.9682-0.9846	8443.2	1200.65	0.8		Acetylation (N-term)	HCD
M1_3_RB1_1_8834.d	LPTET	F2:13681	5	93	93	5	560.294	1.0974-1.1137	0	559.285	1.9			HCD
M1_2_RB1_1_8832.d	HESTNLSQEK	F1:5176	10	93	93	10	586.783	0.8767-0.8932	2026	1171.55	4.5	B7VGF9:C1L3G3		HCD
M1_3_RB1_1_8834.d	DTVKKL	F2:8856	6	93	93	6	352.221	0.7209-0.7376	2209.2	702.428	1	A0A8C4L1V5:A0A8C4L4B8:A0A8C4LYI3:A0A8C4M135:A0A8C4M712		HCD
M1_2_RB1_1_8832.d	DFDGKL	F1:30032	6	93	93	6	694.343	1.1680-1.1843	0	693.333	2.9	A0A8C4MNW2		HCD
M2-1_3_RB1_1_8839.d	LPDKY	F5:12939	5	93	93	5	635.34	1.1714-1.1877	0	634.333	0.8			HCD
M1_3_RB1_1_8834.d	SKSRKF	F2:2070	6	93	93	6	752.437	1.2776-1.2938	0	751.434	-5.7	A0A8C4LXL5		HCD
M1_3_RB1_1_8834.d	SPKVRKV	F2:3689	7	93	93	7	407.272	0.7813-0.7979	667.59	812.523	6.6	A0A8C4MQT7:A0A8C4MPM2		HCD
M2-1_2_RB1_1_8837.d	PPPPPPP	F4:22887	7	93	93	7	698.39	1.2506-1.2668	0	697.38	4.4	A0A8C4MTS8:A0A8C4LUM8:A0A8C4KXX4:A0A8C4M9E1:A0A8C4M3B4:A0A8C4LMY3:A0A8C4LNL1:A0A8C4LAX9:A0A8C4L5S0:A0A8C4LV13:A0A8C4LX24:A0A8C4LYB5:A0A8C4MZE5:A0A8C4LIZ6:A0A8C4LIA5:A0A8C4MVP1:A0A8C4MF50:A0A8C4MIB0:A0A8C4M7H9:A0A8C4MP75:A0A8C4L1M4:A0A8C4L0M4:A0A8C4MG23:A0A8C4MAY6:A0A8C4LUX7:A0A8C4NB56:A0A8C4MTY2:A0A8C4N2U9:A0A8C4LIL0:A0A8C4LI36:A0A8C4LI35:A0A8C4MLD5:A0A8C4MJU3:A0A8C4MMK2:A0A8C4PSM7:A0A8C4MLT9:A0A…		HCD
M1_2_RB1_1_8832.d	SPAEFK	F1:11696	6	93	93	6	678.349	1.1985-1.2148	0	677.338	4.8	P13613		HCD
M1_3_RB1_1_8834.d	TPVTKLE	F2:17935	7	93	93	7	394.233	0.7848-0.8014	1850.2	786.449	4	A0A8C4LHK7		HCD
M1_RB1_1_8657.d	APARPPPGGPGALAPLRP	F3:35642	18	93	93	18	564.662	0.8767-0.8932	39604	1690.96	0.3	A0A8C4N5V1:A0A8C4N1C2:A0A8C4M4P4:A0A8C4N8C5:A0A8C4LUX7:A0A8C4MNZ6:A0A8C4MP05:A0A8C4M1X1:A0A8C4N3Z1:A0A8C4LF53:A0A8C4LF38:A0A8C4LBJ9:A0A8C4LGH9:A0A8C4PQY9		HCD
M2-1_2_RB1_1_8837.d	LGADKYF	F4:24943	7	93	93	7	407.211	0.7660-0.7827	1618.3	812.407	1	A0A8C4LEB1		HCD
M2-1_RB1_1_8659.d	DPNHFRPR	F6:6213	8	93	93	8	519.766	0.8532-0.8698	8399	1037.52	1.4	A0A8C4LEB1		HCD
M1_2_RB1_1_8832.d	GPPPP	F1:8885	5	93	93	5	464.25	0.9887-1.0052	0	463.243	0.5			HCD
M1_RB1_1_8657.d	ETLLPKHK	F3:11874	8	93	93	8	483.294	0.8664-0.8829	196.94	964.571	2.9	D2EC27:A0A8C4LA55		HCD
M1_3_RB1_1_8834.d	DERFF	F2:38785	5	93	93	5	713.323	1.2357-1.2520	0	712.318	-3.4			HCD
M1_2_RB1_1_8832.d	APPPKY	F1:20649	6	93	93	6	672.372	1.2040-1.2202	0	671.364	1.4			HCD
M1_3_RB1_1_8834.d	EPVKKV	F2:4415	6	93	93	6	350.223	0.7195-0.7362	1265.9	698.433	-2.2	A0A8C4M5J3:A0A8C4M6R7:A0A8C4KZL8		HCD
M2-1_3_RB1_1_8839.d	APFPEV	F5:29684	6	93	93	6	659.341	1.1850-1.2012	0	658.333	1.6			HCD
M1_2_RB1_1_8832.d	VRPPVR	F1:11900	6	93	93	6	362.237	0.7383-0.7549	493.15	722.455	5.2			HCD
M2-1_RB1_1_8659.d	ELEKKF	F6:10821	6	93	93	6	397.228	0.7640-0.7806	0	792.438	4.5	A0A8C4MXV1		HCD
M1_3_RB1_1_8834.d	PPPPP	F2:12191	5	93	93	5	504.284	1.0127-1.0291	0	503.274	4.6			HCD
M2-1_2_RB1_1_8837.d	DN(+.98)GLSAAARKQ	F4:8967	11	93	93	11	566.293	0.8870-0.9036	2127	1130.57	2.9	A0A8C4MP75:A0A8C4LZI7:A0A8C4LSX9:A0A8C4LQG6:A0A8C4LSB3:A0A8C4LRV3	Deamidation (NQ)	HCD
M1_2_RB1_1_8832.d	KGNLEYKEVVPLNTEK	F1:31411	16	93	93	16	621.011	0.8753-0.8919	5912.1	1860	5.7	P86272:C3W972		HCD
M2-1_3_RB1_1_8839.d	LPKKSL	F5:3889	6	93	93	6	343.235	0.7077-0.7244	5027.8	684.453	3.9	A0A8C4MEW8		HCD
M2-1_RB1_1_8659.d	EVQ(+.98)HQDKLSRF	F6:13877	11	93	93	11	463.24	0.8194-0.8360	2048.6	1386.69	6.8	D2EC27	Deamidation (NQ)	HCD
M1_2_RB1_1_8832.d	DDLAKV	F1:19728	6	93	93	6	660.359	1.2303-1.2466	0	659.349	3.6	A0A8C4LJ03:A0A8C4LZ41:A0A8C4LYI1:A0A8C4M487:A0A8C4M0J3		HCD
M1_3_RB1_1_8834.d	EVKRL	F2:6373	5	93	93	5	322.709	0.7327-0.7494	112.95	643.402	4			HCD
M1_RB1_1_8657.d	LPLLQK	F3:32912	6	93	93	6	356.242	0.7563-0.7730	63065	710.469	1	A0A8C4MSR3:A0A8C4MXA0		HCD
M2-1_RB1_1_8659.d	EVDKKL	F6:4782	6	93	93	6	366.22	0.7459-0.7626	12839	730.423	3.5	A0A8C4LD25		HCD
M1_2_RB1_1_8832.d	EVDKKL	F1:7277	6	93	93	6	731.431	1.2810-1.2971	0	730.423	1.4	A0A8C4LD25		HCD
M2-1_2_RB1_1_8837.d	DQDPLTKT	F4:11676	8	93	93	8	459.233	0.7945-0.8111	8974.6	916.45	2.1	A0A8C4KZN3:A0A8C4L2D4		HCD
M2-1_3_RB1_1_8839.d	EPPVKL	F5:22993	6	93	93	6	682.415	1.2533-1.2695	0	681.406	2.4	A0A8C4LYT8		HCD
M1_2_RB1_1_8832.d	MPFLK	F1:38619	5	93	93	5	635.36	1.2040-1.2202	0	634.351	2.1			HCD
M1_2_RB1_1_8832.d	LPVGTY	F1:34569	6	93	93	6	649.357	1.1965-1.2128	0	648.348	1.6			HCD
M1_2_RB1_1_8832.d	PPLKLP	F1:40135	6	93	93	6	332.724	0.7529-0.7695	3143	663.432	2.1	A0A8C4MEG2:A0A8C4LZZ3:A0A8C4MPW1:A0A8C4MUI6		HCD
M1_2_RB1_1_8832.d	GPPTKKL	F1:6917	7	93	93	7	370.738	0.7327-0.7494	1609.1	739.459	3.6	A0A8C4L8E3		HCD
M1_RB1_1_8657.d	DKAVKPL	F3:13159	7	93	93	7	385.741	0.7473-0.7640	2611.7	769.47	-3.5	A0A8C4L8U6		HCD
M1_3_RB1_1_8834.d	AHVPDQ(+.98)LVKKL	F2:50248	11	93	93	11	624.867	0.9352-0.9517	4458.2	1247.72	-3.4	A0A8C4L4D1:A0A8C4MMY3:A0A8C4KYR6:A0A8C4PFG6:A0A8C4KXU0:A0A8C4N2S5	Deamidation (NQ)	HCD
M1_3_RB1_1_8834.d	DPATQPLVVPHNPVLN	F2:48039	16	93	93	16	855.968	1.1185-1.1348	50206	1709.91	6.8	D2EC27		HCD
M1_2_RB1_1_8832.d	LEVKKL	F1:15993	6	93	93	6	365.246	0.7299-0.7466	0	728.48	-3.6	A0A8C4ML69:A0A8C4PQX9:A0A8C4MA26:A0A8C4MDS9		HCD
M2-1_3_RB1_1_8839.d	DN(+.98)GLSAAARKQ	F5:8976	11	93	93	11	566.294	0.8884-0.9050	2142	1130.57	5.4	A0A8C4MP75:A0A8C4LZI7:A0A8C4LSX9:A0A8C4LQG6:A0A8C4LSB3:A0A8C4LRV3	Deamidation (NQ)	HCD
M2-1_RB1_1_8659.d	DQTKLPLK	F6:16029	8	93	93	8	471.787	0.8436-0.8601	192.13	941.555	5.9	A0A8C4L2K7		HCD
M1_2_RB1_1_8832.d	DAVRKL	F1:10256	6	93	93	6	351.219	0.7188-0.7355	2127.6	700.423	0.8	A0A8C4LD25		HCD
M1_3_RB1_1_8834.d	SPAKPKAV	F2:5870	8	93	93	8	399.248	0.7986-0.8152	3497.1	796.481	1.2			HCD
M2-1_RB1_1_8659.d	SEEKVQKF	F6:9162	8	93	93	8	497.764	0.8298-0.8463	1237.9	993.513	-0.5	D2EC27:A0A8C4KT44:A0A8C4MNE2:A0A8C4MD75:A0A8C4PRJ1:A0A8C4MEB5:A0A8C4MCX6:A0A8C4PRX7		HCD
M1_2_RB1_1_8832.d	KLPRV	F1:10006	5	93	93	5	306.712	0.7049-0.7216	0	611.412	-3			HCD
M2-1_2_RB1_1_8837.d	ELPKKT	F4:2019	6	93	93	6	358.223	0.7202-0.7369	2600.2	714.428	4.4	B7VGF9		HCD
M1_2_RB1_1_8832.d	LPLLQK	F1:33261	6	93	93	6	356.242	0.7466-0.7633	59040	710.469	0.4	A0A8C4MSR3:A0A8C4MXA0		HCD
M2-1_RB1_1_8659.d	DERFF	F6:26798	5	93	93	5	713.327	1.2324-1.2486	0	712.318	2.9			HCD
M1_RB1_1_8657.d	A(+42.01)PPPDELVKKL	F3:49631	11	93	93	11	624.863	0.9462-0.9627	4395.2	1247.71	-1	A0A8C4L9Z3:A0A8C4LBK0:A0A8C4LEL1:A0A8C4LGW5:A0A8C4LB42:A0A8C4LJD7:A0A8C4LKU6	Acetylation (N-term)	HCD
M1_3_RB1_1_8834.d	PPKLHP	F2:7410	6	93	93	6	344.712	0.7111-0.7278	487.59	687.407	3.1			HCD
M2-1_3_RB1_1_8839.d	DKDAKF	F5:4625	6	93	93	6	362.189	0.7035-0.7202	2102.8	722.36	3.8	A0A8C4LBN5		HCD
M1_3_RB1_1_8834.d	LPDKY	F2:16773	5	93	93	5	318.175	0.7042-0.7209	15950	634.333	3.1			HCD
M1_3_RB1_1_8834.d	TLLPK	F2:23170	5	93	93	5	571.384	1.1721-1.1884	0	570.374	4			HCD
M1_RB1_1_8657.d	DGHVKV	F3:7432	6	93	93	6	654.356	1.2344-1.2506	0	653.35	-1.6			HCD
M1_RB1_1_8657.d	DPDTHPHLFLYEDKS	F3:39355	15	93	93	15	605.284	0.8291-0.8457	103.87	1812.83	-0.8	A0A8C4LD23		HCD
M1_2_RB1_1_8832.d	DHTTNLS(+79.97)QEKYK	F1:10735	12	93	93	12	515.232	0.8076-0.8242	167750	1542.67	2.5	B7VGF9:C1L3G3:A0A8C4MHP1:A0A8C4MKT7:A0A8C4MCS3	Phosphorylation (STY)	HCD
M2-1_2_RB1_1_8837.d	DPQSHKVL	F4:9736	8	93	93	8	462.253	0.7792-0.7958	1482.4	922.487	4.6	A0A8C4MBA7		HCD
M1_3_RB1_1_8834.d	LPLLQQ	F2:44140	6	93	93	6	711.44	1.2735-1.2897	0	710.433	0	A0A8C4MSR3:A0A8C4MXA0		HCD
M2-1_3_RB1_1_8839.d	APARPPPGGPGASAPLRP	F5:19905	18	93	93	18	555.978	0.8477-0.8643	10951	1664.91	1.5	A0A8C4N5V1:A0A8C4N1C2:A0A8C4PJ30:A0A8C4M4P4:A0A8C4N8C5:A0A8C4LUX7:A0A8C4M1X1:A0A8C4LF53:A0A8C4LF38:A0A8C4LBJ9:A0A8C4LGH9:A0A8C4L2K7:A0A8C4PQY9		HCD
M1_3_RB1_1_8834.d	VGVLKAVDKK	F2:13207	10	93	93	10	528.841	0.8815-0.8981	0	1055.67	-3.4	A0A8C4L5X9		HCD
M2-1_RB1_1_8659.d	DDRSTDKTKKL	F6:2033	11	93	93	11	436.237	0.7369-0.7535	6937.3	1305.69	-0.5			HCD
M2-1_RB1_1_8659.d	DDNEKALKV	F6:15664	9	93	93	9	516.273	0.8436-0.8601	1081.2	1030.53	1	A0A8C4M6N0:A0A8C4PQ06:A0A8C4M9C8:A0A8C4M5V6:A0A8C4LY34		HCD
M1_2_RB1_1_8832.d	HESTNLSQEK	F1:5159	10	93	93	10	586.783	0.8788-0.8953	2026	1171.55	4.5	B7VGF9:C1L3G3		HCD
M2-1_3_RB1_1_8839.d	EEVPKKV	F5:5084	7	93	93	7	414.747	0.7445-0.7612	15633	827.475	3.8			HCD
M1_RB1_1_8657.d	APRAPPPGGPGASAPLPR	F3:24516	18	93	93	18	555.979	0.8629-0.8795	73572	1664.91	3.4	A0A8C4N5V1:A0A8C4N1C2:A0A8C4PJ30:A0A8C4M4P4:A0A8C4N8C5:A0A8C4LBJ9:A0A8C4LGH9:A0A8C4L2K7		HCD
M2-1_RB1_1_8659.d	M(+42.01)EGAEEK	F6:11713	7	93	93	7	835.351	1.2796-1.2958	0	834.343	1.2		Acetylation (N-term)	HCD
M1_2_RB1_1_8832.d	APLKPH	F1:4893	6	93	93	6	331.705	0.7202-0.7369	894.17	661.391	5.9			HCD
M2-1_RB1_1_8659.d	DDSRTDKTKKL	F6:2078	11	93	93	11	436.237	0.7362-0.7529	6937.3	1305.69	-0.5			HCD
M1_RB1_1_8657.d	HESTNLS(+79.97)QEYK	F3:16434	11	93	93	11	708.297	0.9750-0.9915	111670	1414.58	1.8	C1L3G3	Phosphorylation (STY)	HCD
M1_3_RB1_1_8834.d	P(+42.01)APPDELVKKL	F2:50230	11	93	93	11	624.867	0.9345-0.9510	4458.2	1247.71	5.6	A0A8C4L9Z3:A0A8C4LBK0:A0A8C4LEL1:A0A8C4LGW5:A0A8C4LB42:A0A8C4LJD7:A0A8C4LKU6	Acetylation (N-term)	HCD
M1_RB1_1_8657.d	M(+42.01)LKLF	F3:58052	5	93	93	5	693.398	1.2863-1.3025	0	692.393	-2.8		Acetylation (N-term)	HCD
M1_2_RB1_1_8832.d	KHESTARSQEKY	F1:10239	12	93	93	12	732.365	1.0004-1.0168	1593.9	1462.72	0	A0A8C4LRJ8:A0A8C4LH47:A0A8C4LJ06		HCD
M1_RB1_1_8657.d	KHESNTLSQEKYK	F3:6597	13	93	93	13	531.275	0.8159-0.8325	5399.9	1590.8	2	C1L3G3:A0A8C4N092:A0A8C4MZN1:A0A8C4N4N8:A0A8C4MZ38:A0A8C4PVB2:A0A8C4MHP1:A0A8C4MKT7:A0A8C4MCS3		HCD
M1_RB1_1_8657.d	KVREVK	F3:1556	6	93	93	6	379.748	0.7695-0.7861	0	757.481	0.4			HCD
M1_2_RB1_1_8832.d	RPGPFSPF	F1:44715	8	93	93	8	452.74	0.7910-0.8076	29471	903.46	6.1	A0A8C4LKC9		HCD
M1_2_RB1_1_8832.d	WLKEKVRR	F1:19851	8	93	93	8	372.232	0.7431-0.7598	0	1113.68	-3.7			HCD
M1_3_RB1_1_8834.d	EELHLVM(+15.99)	F2:34125	7	93	93	7	443.722	0.8021-0.8187	716.35	885.427	4.1	A0A8C4MTS8	Oxidation (M)	HCD
M2-1_2_RB1_1_8837.d	DKALKKF	F4:6231	7	93	93	7	425.261	0.7681-0.7848	0	848.512	-4.9	A0A8C4L1G5		HCD
M2-1_2_RB1_1_8837.d	EDKPDM	F4:11827	6	93	93	6	734.303	1.2533-1.2695	0	733.295	1.1			HCD
M2-1_2_RB1_1_8837.d	LPDKY	F4:13308	5	93	93	5	635.34	1.1225-1.1389	0	634.333	0			HCD
M1_3_RB1_1_8834.d	SLSSKRL	F2:11297	7	93	93	7	395.745	0.7806-0.7972	5052.2	789.471	4.8			HCD
M2-1_2_RB1_1_8837.d	FNEEEEEE	F4:8457	8	93	93	8	527.697	0.8463-0.8629	0	1053.38	2.8	A0A8C4PPH6:A0A8C4PIE6:A0A8C4PJP9:A0A8C4LGI0:A0A8C4LH82:A0A8C4LIG3:A0A8C4L5S0:A0A8C4LQJ7:A0A8C4MVP1:A0A8C4MHP0:A0A8C4LVW8:A0A8C4LW11:A0A8C4MQZ7:A0A8C4LQF5:A0A8C4LWJ6:A0A8C4M946:A0A8C4M8N2:A0A8C4MGF2:A0A8C4PQY4:A0A8C4LKJ0:A0A8C4M0B2:A0A8C4LC51:A0A8C4MSP9:A0A8C4PU63:A0A8C4MU62:A0A8C4M487:A0A8C4M0J3:A0A8C4MRR0:A0A8C4MA64:A0A8C4MK65:A0A8C4L2K7:A0A8C4PGF3:A0A8C4MBW3:A0A8C4MFI5:A0A8C4MN77:A0A8C4M393:A0A…		HCD
M2-1_RB1_1_8659.d	FTRPPP	F6:15106	6	93	93	6	357.7	0.7348-0.7515	0	713.386	-0.6			HCD
M1_3_RB1_1_8834.d	SLTDKLELTKEEK	F2:28777	13	93	93	13	511.951	0.8097-0.8263	1401.2	1532.83	0.9	A0A8C4LTE2:A0A8C4M6N0:A0A8C4PQ06:A0A8C4M9C8:A0A8C4M5V6:A0A8C4MUK2		HCD
M1_3_RB1_1_8834.d	SDQTVAVTR	F2:13353	9	93	93	9	488.756	0.8083-0.8249	308.32	975.499	-0.8			HCD
M2-1_2_RB1_1_8837.d	HESTNLS(+79.97)QEKYK	F4:8217	12	93	93	12	772.344	1.0353-1.0517	387980	1542.67	1.4	B7VGF9:C1L3G3:A0A8C4MHP1:A0A8C4MKT7:A0A8C4MCS3	Phosphorylation (STY)	HCD
M2-1_RB1_1_8659.d	DDLSKV	F6:11673	6	93	93	6	676.348	1.2080-1.2243	0	675.344	-4			HCD
M2-1_2_RB1_1_8837.d	EDPKSDLKA	F4:9313	9	93	93	9	501.76	0.8173-0.8339	2343.7	1001.5	3			HCD
M1_2_RB1_1_8832.d	EDPKSDLKAA	F1:12457	10	93	93	10	537.28	0.8470-0.8636	309.58	1072.54	5.3	A0A8C4M3K2:A0A8C4M1Q2		HCD
M1_2_RB1_1_8832.d	DRPRRL	F1:4692	6	93	93	6	406.748	0.7466-0.7633	1040.9	811.478	5.1	A0A8C4MWY8:A0A8C4N6K9:A0A8C4MAK5		HCD
M1_3_RB1_1_8834.d	HPELLQ	F2:20115	6	93	93	6	736.399	1.2378-1.2540	0	735.391	0.2	P86272:C3W972:A0A8C4PJH0		HCD
M1_3_RB1_1_8834.d	DHTTNLS(+79.97)QEKYK	F2:10769	12	93	93	12	515.232	0.7958-0.8125	0	1542.67	2.2	B7VGF9:C1L3G3:A0A8C4MHP1:A0A8C4MKT7:A0A8C4MCS3	Phosphorylation (STY)	HCD
M2-1_2_RB1_1_8837.d	DGKLKL	F4:16089	6	93	93	6	337.217	0.7306-0.7473	506.71	672.417	3	A0A8C4MPT2		HCD
M1_2_RB1_1_8832.d	DEEKNF	F1:11278	6	93	93	6	781.34	1.2499-1.2661	0	780.329	4.1			HCD
M1_3_RB1_1_8834.d	LPDLFPADFK	F2:56008	10	93	93	10	581.812	0.8781-0.8946	25961	1161.61	2.4			HCD
M2-1_3_RB1_1_8839.d	EKPPP	F5:5025	5	93	93	5	567.315	1.1048-1.1212	0	566.306	2.1			HCD
M1_2_RB1_1_8832.d	EKAHPP	F1:6833	6	93	93	6	678.36	1.1816-1.1979	0	677.35	4.8			HCD
M2-1_2_RB1_1_8837.d	PPPPPPP	F4:15234	7	93	93	7	698.385	1.2168-1.2330	0	697.38	-2.6	A0A8C4MTS8:A0A8C4LUM8:A0A8C4KXX4:A0A8C4M9E1:A0A8C4M3B4:A0A8C4LMY3:A0A8C4LNL1:A0A8C4LAX9:A0A8C4L5S0:A0A8C4LV13:A0A8C4LX24:A0A8C4LYB5:A0A8C4MZE5:A0A8C4LIZ6:A0A8C4LIA5:A0A8C4MVP1:A0A8C4MF50:A0A8C4MIB0:A0A8C4M7H9:A0A8C4MP75:A0A8C4L1M4:A0A8C4L0M4:A0A8C4MG23:A0A8C4MAY6:A0A8C4LUX7:A0A8C4NB56:A0A8C4MTY2:A0A8C4N2U9:A0A8C4LIL0:A0A8C4LI36:A0A8C4LI35:A0A8C4MLD5:A0A8C4MJU3:A0A8C4MMK2:A0A8C4PSM7:A0A8C4MLT9:A0A…		HCD
M1_RB1_1_8657.d	KPPKV	F3:4550	5	93	93	5	568.384	1.1504-1.1667	0	567.374	4.6			HCD
M1_2_RB1_1_8832.d	DDLVSK	F1:11106	6	93	93	6	676.355	1.2012-1.2175	0	675.344	5.9	A0A8C4MEK9:A0A8C4MQV9		HCD
M2-1_2_RB1_1_8837.d	LPKRKV	F4:2135	6	93	93	6	370.762	0.7744-0.7910	1889.6	739.507	3.4	D2EC27		HCD
M2-1_3_RB1_1_8839.d	PPPPPPP	F5:22043	7	93	93	7	698.392	1.2520-1.2681	0	697.38	6.5	A0A8C4MTS8:A0A8C4LUM8:A0A8C4KXX4:A0A8C4M9E1:A0A8C4M3B4:A0A8C4LMY3:A0A8C4LNL1:A0A8C4LAX9:A0A8C4L5S0:A0A8C4LV13:A0A8C4LX24:A0A8C4LYB5:A0A8C4MZE5:A0A8C4LIZ6:A0A8C4LIA5:A0A8C4MVP1:A0A8C4MF50:A0A8C4MIB0:A0A8C4M7H9:A0A8C4MP75:A0A8C4L1M4:A0A8C4L0M4:A0A8C4MG23:A0A8C4MAY6:A0A8C4LUX7:A0A8C4NB56:A0A8C4MTY2:A0A8C4N2U9:A0A8C4LIL0:A0A8C4LI36:A0A8C4LI35:A0A8C4MLD5:A0A8C4MJU3:A0A8C4MMK2:A0A8C4PSM7:A0A8C4MLT9:A0A…		HCD
M2-1_RB1_1_8659.d	EPVKKV	F6:2633	6	93	93	6	350.224	0.7320-0.7487	8430.9	698.433	0.8	A0A8C4M5J3:A0A8C4M6R7:A0A8C4KZL8		HCD
M1_RB1_1_8657.d	SPAKPKAV	F3:5751	8	93	93	8	399.248	0.8132-0.8298	2563.5	796.481	2			HCD
M1_RB1_1_8657.d	LPPPPP	F3:23929	6	93	93	6	617.362	1.1653-1.1816	0	616.358	-5.7	A0A8C4M9E1:A0A8C4M3B4:A0A8C4LAX9:A0A8C4L5S0:A0A8C4LV13:A0A8C4M4P4:A0A8C4LX24:A0A8C4LYB5:A0A8C4LIZ6:A0A8C4MVP1:A0A8C4MP75:A0A8C4L1M4:A0A8C4L0M4:A0A8C4MAY6:A0A8C4M0R7:A0A8C4LUX7:A0A8C4NB56:A0A8C4MTY2:A0A8C4N2U9:A0A8C4LRB2:A0A8C4LSK6:A0A8C4MLD5:A0A8C4MJU3:A0A8C4MMK2:A0A8C4PSM7:A0A8C4MLT9:A0A8C4PSM5:A0A8C4L7E4:A0A8C4LKB4:A0A8C4LJ14:A0A8C4LL04:A0A8C4N944:A0A8C4MX71:A0A8C4MZF3:A0A8C4MX61:A0A8C4MXW9:A0A…		HCD
M2-1_RB1_1_8659.d	ELLLR	F6:20976	5	93	93	5	643.415	1.2276-1.2438	0	642.406	2.7			HCD
M2-1_2_RB1_1_8837.d	EN(+.98)VGQPRL	F4:20401	8	93	93	8	457.243	0.7875-0.8042	978.77	912.466	5.2	A0A8C4KUR1	Deamidation (NQ)	HCD
M2-1_2_RB1_1_8837.d	DSPFLK	F4:22875	6	93	93	6	706.381	1.2188-1.2351	0	705.37	5.8			HCD
M2-1_RB1_1_8659.d	VPLNTEK	F6:8991	7	93	93	7	400.729	0.7522-0.7688	1036	799.444	0.3	P86272:C3W972		HCD
M1_RB1_1_8657.d	DGGRKL	F3:3576	6	93	93	6	323.188	0.7056-0.7223	2634.1	644.361	3	A0A8C4L771:A0A8C4L9J5:A0A8C4LEX8:A0A8C4LA01		HCD
M1_2_RB1_1_8832.d	TGSNPGLHLLL	F1:54123	11	93	93	11	561.32	0.8891-0.9056	1450.1	1120.62	1	A0A8C4LW79:A0A8C4LTV0		HCD
M2-1_2_RB1_1_8837.d	PPLKLKP	F4:19822	7	93	93	7	396.773	0.7431-0.7598	180.15	791.527	5.1			HCD
M1_3_RB1_1_8834.d	APPVPRP	F2:15787	7	93	93	7	367.222	0.7806-0.7972	14670	732.428	2.5			HCD
M2-1_RB1_1_8659.d	LTEEEL	F6:23237	6	93	93	6	733.364	1.2708-1.2870	0	732.354	3.6	A0A8C4MSR3		HCD
M1_3_RB1_1_8834.d	EPVKKV	F2:4399	6	93	93	6	350.223	0.7181-0.7348	1265.9	698.433	-2.2	A0A8C4M5J3:A0A8C4M6R7:A0A8C4KZL8		HCD
M1_3_RB1_1_8834.d	LPTE	F2:11800	4	93	93	4	459.247	0.9819-0.9983	0	458.238	5.5			HCD
M1_3_RB1_1_8834.d	PPPPKY	F2:19564	6	93	93	6	698.389	1.2493-1.2654	0	697.38	2.1			HCD
M2-1_3_RB1_1_8839.d	DPDKLEKL	F5:17334	8	93	93	8	479.267	0.8021-0.8187	196.38	956.518	1.4			HCD
M1_3_RB1_1_8834.d	EPPYS	F2:12707	5	93	93	5	592.26	1.1130-1.1293	0	591.254	-2.5			HCD
M2-1_2_RB1_1_8837.d	EDQLKKL	F4:11204	7	93	93	7	437.255	0.7737-0.7903	0	872.497	-0.7	A0A8C4MD96:A0A8C4M6N0:A0A8C4PQ06:A0A8C4M9C8:A0A8C4M5V6:A0A8C4MUH0		HCD
M1_2_RB1_1_8832.d	LPTQ	F1:8745	4	93	93	4	458.263	0.9908-1.0072	0	457.254	5			HCD
M1_3_RB1_1_8834.d	NHFRPR	F2:3763	6	93	93	6	413.727	0.7820-0.7986	1346.3	825.436	3.9			HCD
M1_RB1_1_8657.d	Q(+.98)RKFSP	F3:8886	6	93	93	6	382.211	0.7605-0.7771	10351	762.402	6.4		Deamidation (NQ)	HCD
M1_2_RB1_1_8832.d	EKVEKF	F1:10661	6	93	93	6	390.22	0.7383-0.7549	1108.7	778.423	4.9			HCD
M1_RB1_1_8657.d	LPLSM(+15.99)P	F3:31102	6	93	93	6	673.36	1.2445-1.2607	0	672.352	1.6		Oxidation (M)	HCD
M2-1_3_RB1_1_8839.d	ELDSRP	F5:6811	6	93	93	6	716.357	1.2601-1.2762	0	715.35	0.1			HCD
M1_RB1_1_8657.d	Q(+.98)LLKEK	F3:10280	6	93	93	6	380.235	0.7695-0.7861	63034	758.454	1.1	A0A8C4PPH6:A0A8C4LAY0:A0A8C4MCY2:A0A8C4M6X1	Deamidation (NQ)	HCD
M2-1_3_RB1_1_8839.d	KSEDEDKYLK	F5:7828	10	93	93	10	418.876	0.7619-0.7785	0	1253.61	-5.5	A0A8C4LXL5:A0A8C4KQK5		HCD
M1_3_RB1_1_8834.d	HESTNLS(+79.97)EEKYK	F2:12040	12	93	93	12	772.838	1.0407-1.0571	17932	1543.66	4.3	C1L3G3:A0A8C4LTE2	Phosphorylation (STY)	HCD
M2-1_3_RB1_1_8839.d	EDPKSDLK	F5:4675	8	93	93	8	466.243	0.8076-0.8242	1018.8	930.466	5.5			HCD
M1_3_RB1_1_8834.d	RPLPLRG	F2:16839	7	93	93	7	404.762	0.7598-0.7764	6823.1	807.508	2.3	A0A8C4L8U6		HCD
M2-1_3_RB1_1_8839.d	DGEKEAKL	F5:6953	8	93	93	8	445.237	0.7764-0.7931	1598.9	888.455	5.2	A0A8C4PSY6:A0A8C4MMW0		HCD
M1_3_RB1_1_8834.d	DKLFRS	F2:15045	6	93	93	6	383.218	0.7445-0.7612	4445.4	764.418	5.6			HCD
M2-1_2_RB1_1_8837.d	VEDLKKV	F4:20478	7	93	93	7	415.755	0.7633-0.7799	518.15	829.491	5.7			HCD
M1_2_RB1_1_8832.d	VGPFYPQ	F1:41883	7	93	93	7	807.407	1.2803-1.2964	0	806.396	4.5			HCD
M2-1_RB1_1_8659.d	EDKPDM	F6:11886	6	93	93	6	734.3	1.2661-1.2823	0	733.295	-3.5			HCD
M1_3_RB1_1_8834.d	EN(+.98)LTKKL	F2:32584	7	93	93	7	423.751	0.7868-0.8035	237.16	845.486	2.1	A0A8C4MSR3	Deamidation (NQ)	HCD
M1_3_RB1_1_8834.d	NPLLTK	F2:15232	6	93	93	6	685.428	1.2202-1.2364	0	684.417	5.3	A0A8C4KYA3		HCD
M1_2_RB1_1_8832.d	LSSSKL	F1:20537	6	93	93	6	634.378	1.2290-1.2452	0	633.37	1.7			HCD
M1_3_RB1_1_8834.d	ESSPVNVKKL	F2:32132	10	93	93	10	550.816	0.8864-0.9029	0	1099.62	-6.5	A0A8C4L5T7:A0A8C4KW43:A0A8C4MFC5:A0A8C4MFN4		HCD
M1_3_RB1_1_8834.d	GSHVKV	F2:4995	6	93	93	6	626.365	1.2100-1.2263	0	625.355	5.3			HCD
M2-1_RB1_1_8659.d	DEETKKLKL	F6:16035	9	93	93	9	552.321	0.8622-0.8788	270.1	1102.62	4.3	A0A8C4L4V2:A0A8C4LU65:A0A8C4MG67:A0A8C4MP87:A0A8C4MZ99:A0A8C4MUP9		HCD
M1_3_RB1_1_8834.d	TPKWKFPSMSEAR	F2:20968	13	93	93	13	522.268	0.8822-0.8988	3893.1	1563.79	-2.7	A0A8C4LD23		HCD
M1_RB1_1_8657.d	P(+42.01)AAPEKPVKKQ	F3:11239	11	93	93	11	617.862	0.9105-0.9270	8971.4	1233.71	2	A0A8C4LD25:A0A8C4MF50:A0A8C4MIB0:A0A8C4M7H9	Acetylation (N-term)	HCD
M2-1_RB1_1_8659.d	S(+79.97)EEKVQKF	F6:12644	8	93	93	8	537.748	0.8401-0.8567	25279	1073.48	2.3	D2EC27:A0A8C4KT44:A0A8C4MNE2:A0A8C4MD75:A0A8C4PRJ1:A0A8C4MEB5:A0A8C4MCX6:A0A8C4PRX7	Phosphorylation (STY)	HCD
M2-1_3_RB1_1_8839.d	EEN(+.98)KAFKQ	F5:4515	8	93	93	8	497.748	0.8083-0.8249	1897.1	993.477	4	A0A8C4M686:A0A8C4MBZ9:A0A8C4MBY1	Deamidation (NQ)	HCD
M2-1_2_RB1_1_8837.d	DN(+.98)GLSAAARKQ	F4:8889	11	93	93	11	566.293	0.8870-0.9036	2127	1130.57	2.9	A0A8C4MP75:A0A8C4LZI7:A0A8C4LSX9:A0A8C4LQG6:A0A8C4LSB3:A0A8C4LRV3	Deamidation (NQ)	HCD
M1_2_RB1_1_8832.d	DNLRSSYK(+42.01)	F1:37303	8	93	93	8	512.759	0.8574-0.8739	0	1023.5	4.1		Acetylation (K)	HCD
M2-1_2_RB1_1_8837.d	S(+79.97)EEKVQKF	F4:12571	8	93	93	8	537.75	0.8325-0.8491	22922	1073.48	5.3	D2EC27:A0A8C4KT44:A0A8C4MNE2:A0A8C4MD75:A0A8C4PRJ1:A0A8C4MEB5:A0A8C4MCX6:A0A8C4PRX7	Phosphorylation (STY)	HCD
M2-1_3_RB1_1_8839.d	M(+42.01)DKL	F5:26672	4	93	93	4	548.275	1.1361-1.1524	0	547.268	1.2		Acetylation (N-term)	HCD
M2-1_3_RB1_1_8839.d	M(+42.01)ERAETLLR	F5:28867	9	93	93	9	580.809	0.9387-0.9551	1319	1159.6	1.8		Acetylation (N-term)	HCD
M2-1_3_RB1_1_8839.d	EHSTNLSQEKYK	F5:6378	12	93	93	12	488.578	0.8215-0.8381	25955	1462.71	5	B7VGF9:C1L3G3:A0A8C4MHP1:A0A8C4MKT7:A0A8C4MCS3		HCD
M1_RB1_1_8657.d	KNLKEKQ	F3:10243	7	93	93	7	444.268	0.8159-0.8325	0	886.524	-2.8	A0A8C4M6N0:A0A8C4PQ06:A0A8C4M9C8:A0A8C4M5V6:A0A8C4M686:A0A8C4MBZ9:A0A8C4MBY1		HCD
M1_3_RB1_1_8834.d	KPKLAKPK	F2:3271	8	93	93	8	455.313	0.8325-0.8491	378.53	908.617	-5.3			HCD
M2-1_RB1_1_8659.d	M(+42.01)DKL	F6:26217	4	93	93	4	548.276	1.1450-1.1613	0	547.268	2.2		Acetylation (N-term)	HCD
M2-1_RB1_1_8659.d	EDPKSDLK	F6:4698	8	93	93	8	466.242	0.8138-0.8304	1322.5	930.466	3.9			HCD
M1_2_RB1_1_8832.d	EDKPDM	F1:14944	6	93	93	6	734.307	1.2276-1.2438	0	733.295	6.6			HCD
M1_3_RB1_1_8834.d	RPPPKP	F2:4221	6	93	93	6	346.217	0.7549-0.7716	7952.3	690.418	1.6	A0A8C4M410:A0A8C4L1G5		HCD
M1_3_RB1_1_8834.d	LGADKYF	F2:34083	7	93	93	7	407.213	0.7667-0.7834	3930.8	812.407	4.8	A0A8C4LEB1		HCD
M1_2_RB1_1_8832.d	VPPPP	F1:17717	5	93	93	5	506.298	1.0442-1.0605	0	505.29	1.4			HCD
M1_3_RB1_1_8834.d	APARPPPGGPGASAPLRP	F2:24832	18	93	93	18	555.98	0.8532-0.8698	931.23	1664.91	4.9	A0A8C4N5V1:A0A8C4N1C2:A0A8C4PJ30:A0A8C4M4P4:A0A8C4N8C5:A0A8C4LUX7:A0A8C4M1X1:A0A8C4LF53:A0A8C4LF38:A0A8C4LBJ9:A0A8C4LGH9:A0A8C4L2K7:A0A8C4PQY9		HCD
M1_2_RB1_1_8832.d	HPHLF	F1:23724	5	93	93	5	650.342	1.2006-1.2168	0	649.334	1.6			HCD
M2-1_RB1_1_8659.d	RLEDRA	F6:2157	6	93	93	6	380.209	0.7778-0.7945	420.73	758.403	-0.5			HCD
M1_3_RB1_1_8834.d	LPDKY	F2:16357	5	93	93	5	635.338	1.1972-1.2134	0	634.333	-2.3			HCD
M2-1_RB1_1_8659.d	PPPPPPP	F6:16733	7	93	93	7	698.391	1.2290-1.2452	0	697.38	5.5	A0A8C4MTS8:A0A8C4LUM8:A0A8C4KXX4:A0A8C4M9E1:A0A8C4M3B4:A0A8C4LMY3:A0A8C4LNL1:A0A8C4LAX9:A0A8C4L5S0:A0A8C4LV13:A0A8C4LX24:A0A8C4LYB5:A0A8C4MZE5:A0A8C4LIZ6:A0A8C4LIA5:A0A8C4MVP1:A0A8C4MF50:A0A8C4MIB0:A0A8C4M7H9:A0A8C4MP75:A0A8C4L1M4:A0A8C4L0M4:A0A8C4MG23:A0A8C4MAY6:A0A8C4LUX7:A0A8C4NB56:A0A8C4MTY2:A0A8C4N2U9:A0A8C4LIL0:A0A8C4LI36:A0A8C4LI35:A0A8C4MLD5:A0A8C4MJU3:A0A8C4MMK2:A0A8C4PSM7:A0A8C4MLT9:A0A…		HCD
M2-1_3_RB1_1_8839.d	DFDGKL	F5:22830	6	93	93	6	694.342	1.1653-1.1816	0	693.333	2	A0A8C4MNW2		HCD
M1_2_RB1_1_8832.d	ERFVQDLSK	F1:41361	9	93	93	9	561.304	0.9008-0.9173	2265.5	1120.59	4.7			HCD
M1_3_RB1_1_8834.d	AYLSTK	F2:11732	6	93	93	6	682.377	1.2452-1.2614	0	681.37	-0.4	A0A8C4MSR3		HCD
M1_3_RB1_1_8834.d	HSDAVSLCVLKPDPSQK	F2:35722	17	93	93	17	608.651	0.8981-0.9146	53829	1822.92	3.7	A0A8C4LXL5:A0A8C4MLW6		HCD
M2-1_RB1_1_8659.d	DAQDKLY	F6:16260	7	93	93	7	852.405	1.2803-1.2964	0	851.403	-5	A0A8C4MSR3:A0A8C4M4P4		HCD
M2-1_2_RB1_1_8837.d	DERFF	F4:26993	5	93	93	5	713.329	1.2222-1.2384	0	712.318	5			HCD
M1_2_RB1_1_8832.d	ELLKPK	F1:11028	6	93	93	6	364.239	0.7584-0.7751	483.09	726.464	-0.5	A0A8C4KVW3:A0A8C4MYX8:A0A8C4N1D3:A0A8C4MU64:A0A8C4PU53:A0A8C4MSI2:A0A8C4MUN9:A0A8C4MRU4		HCD
M1_2_RB1_1_8832.d	A(+42.01)STGPTKRQTLE	F1:16664	12	93	93	12	665.855	0.9730-0.9894	10954	1329.69	5		Acetylation (N-term)	HCD
M1_RB1_1_8657.d	SPLPDL	F3:47788	6	93	93	6	641.355	1.1823-1.1985	0	640.343	6.6	A0A8C4L6A6		HCD
M1_RB1_1_8657.d	P(+42.01)ALLDGVKGGTKE	F3:39364	13	93	93	13	663.864	1.0059-1.0223	413.05	1325.72	-3.6	A0A8C4M895:A0A8C4M4W9:A0A8C4PKI3	Acetylation (N-term)	HCD
M1_RB1_1_8657.d	A(+42.01)EVEKQ	F3:10913	6	93	93	6	745.372	1.2614-1.2776	0	744.365	-1.2	A0A8C4MTT5:A0A8C4LRW5	Acetylation (N-term)	HCD
M1_2_RB1_1_8832.d	DLPLVH	F1:35722	6	93	93	6	693.395	1.2270-1.2432	0	692.386	2.5			HCD
M2-1_3_RB1_1_8839.d	LPTQ	F5:6374	4	93	93	4	458.26	0.9887-1.0052	0	457.254	-2			HCD
M2-1_RB1_1_8659.d	EDVLETSVRK	F6:15963	10	93	93	10	588.319	0.9180-0.9345	2097.4	1174.62	4.1	P0DUB1:A0A8C4L7D7:A0A8C4PHR9:A0A8C4LUD3		HCD
M1_RB1_1_8657.d	TLLPKR	F3:14944	6	93	93	6	364.245	0.7709-0.7875	912.22	726.475	-0.9	D2EC27		HCD
M1_RB1_1_8657.d	EKVEKF	F3:10577	6	93	93	6	390.219	0.7452-0.7619	1657.4	778.423	1.9			HCD
M2-1_3_RB1_1_8839.d	GPGGAW	F5:20654	6	92	92	6	544.25	1.0442-1.0605	0	543.244	-2.8	A0A8C4LEB1		HCD
M1_2_RB1_1_8832.d	LPPKKL	F1:12190	6	92	92	6	348.246	0.7390-0.7556	4016.9	694.474	4.6	F0V6V5:A0A8C4L1U5:A0A8C4M5X6		HCD
M2-1_RB1_1_8659.d	DEEKNFKA	F6:7900	8	92	92	8	490.739	0.8235-0.8401	2918.2	979.461	3			HCD
M1_2_RB1_1_8832.d	YPPK(+42.01)	F1:31455	4	92	92	4	546.295	1.1035-1.1198	0	545.285	5.7		Acetylation (K)	HCD
M2-1_3_RB1_1_8839.d	EEDKAFKQ	F5:4580	8	92	92	8	497.748	0.8076-0.8242	1897.1	993.477	4			HCD
M1_RB1_1_8657.d	EANYLGADKYF	F3:43804	11	92	92	11	645.804	0.9400-0.9565	1948.2	1289.59	0.8	A0A8C4LEB1:A0A8C4MGQ5		HCD
M1_2_RB1_1_8832.d	DAVRKL	F1:10356	6	92	92	6	351.219	0.7195-0.7362	2127.6	700.423	0.8	A0A8C4LD25		HCD
M1_3_RB1_1_8834.d	VPFPLQEP	F2:50490	8	92	92	8	463.754	0.7861-0.8028	4802	925.491	3.3			HCD
M1_3_RB1_1_8834.d	PPPPYK	F2:22452	6	92	92	6	698.386	1.2499-1.2661	0	697.38	-1.8			HCD
M2-1_2_RB1_1_8837.d	LPEW	F4:28586	4	92	92	4	544.279	1.0585-1.0749	0	543.269	4.4			HCD
M2-1_2_RB1_1_8837.d	N(+.98)SSEFRE	F4:11791	7	92	92	7	435.187	0.7653-0.7820	1392.2	868.356	4.7		Deamidation (NQ)	HCD
M2-1_2_RB1_1_8837.d	DDLLRKV	F4:20368	7	92	92	7	429.759	0.7806-0.7972	228.5	857.497	6.9			HCD
M1_3_RB1_1_8834.d	M(+15.99)PFLK	F2:23353	5	92	92	5	651.356	1.2067-1.2229	0	650.346	4.1		Oxidation (M)	HCD
M1_RB1_1_8657.d	CHFKEDLHN	F3:25634	9	92	92	9	571.759	0.8926-0.9091	202.84	1141.5	5.5			HCD
M1_RB1_1_8657.d	LLEQ(+.98)LK	F3:31547	6	92	92	6	372.727	0.7827-0.7993	515.43	743.443	-3.6	A0A8C4MGS3:A0A8C4KXU0:A0A8C4MAG6:A0A8C4M250:A0A8C4LFA4:A0A8C4LJQ2:A0A8C4LFL1:A0A8C4MEN5:A0A8C4MHT5	Deamidation (NQ)	HCD
M2-1_2_RB1_1_8837.d	M(+42.01)ERAE	F4:11060	5	92	92	5	677.292	1.1952-1.2114	0	676.285	0.2		Acetylation (N-term)	HCD
M2-1_3_RB1_1_8839.d	KHESTNLSQEKYK	F5:4298	13	92	92	13	531.276	0.8083-0.8249	8974.7	1590.8	4.7	B7VGF9:C1L3G3:A0A8C4MHP1:A0A8C4MKT7:A0A8C4MCS3		HCD
M2-1_3_RB1_1_8839.d	HLPLP	F5:26709	5	92	92	5	576.35	1.1185-1.1348	0	575.343	-0.6			HCD
M1_2_RB1_1_8832.d	LPKKPK	F1:3277	6	92	92	6	355.751	0.7494-0.7660	468.02	709.485	4.1	A0A8C4KT44		HCD
M1_RB1_1_8657.d	DLKLDRL	F3:37314	7	92	92	7	436.764	0.7979-0.8145	169.4	871.513	1.9	A0A8C4PT60		HCD
M2-1_RB1_1_8659.d	DGGRKL	F6:1390	6	92	92	6	323.188	0.7125-0.7292	8656	644.361	0.4	A0A8C4L771:A0A8C4L9J5:A0A8C4LEX8:A0A8C4LA01		HCD
M1_2_RB1_1_8832.d	PPNLVLK	F1:31724	7	92	92	7	390.751	0.7466-0.7633	116.01	779.49	-3.4	A0A8C4L550:A0A8C4L618:A0A8C4LML2		HCD
M2-1_RB1_1_8659.d	STNLS(+79.97)QEKY	F6:15549	9	92	92	9	575.247	0.8705-0.8870	41031	1148.48	3.5	B7VGF9:C1L3G3	Phosphorylation (STY)	HCD
M1_3_RB1_1_8834.d	KPVSLKR	F2:3383	7	92	92	7	414.277	0.7903-0.8069	396.28	826.539	0.6	A0A8C4KW43		HCD
M2-1_RB1_1_8659.d	KGNLEYK	F6:4873	7	92	92	7	426.235	0.7958-0.8125	2272.8	850.455	0			HCD
M2-1_2_RB1_1_8837.d	TLEQLR	F4:16215	6	92	92	6	380.222	0.7695-0.7861	4444	758.429	0.3	P86272		HCD
M1_RB1_1_8657.d	LDERL	F3:27142	5	92	92	5	645.354	1.2202-1.2364	0	644.349	-4.4			HCD
M2-1_RB1_1_8659.d	DPNHFRPR	F6:6141	8	92	92	8	519.766	0.8553-0.8719	8399	1037.52	1.4	A0A8C4LEB1		HCD
M1_RB1_1_8657.d	EKNELKKH	F3:1347	8	92	92	8	513.289	0.8325-0.8491	0	1024.57	-3.6	A0A8C4LTK2:A0A8C4PSY6:A0A8C4MMW0		HCD
M2-1_2_RB1_1_8837.d	DDSLLRL	F4:29974	7	92	92	7	416.234	0.7737-0.7903	247.53	830.45	4.2			HCD
M1_RB1_1_8657.d	P(+42.01)AAPEKPVKKQ	F3:11118	11	92	92	11	617.862	0.9105-0.9270	8971.4	1233.71	2	A0A8C4LD25:A0A8C4MF50:A0A8C4MIB0:A0A8C4M7H9	Acetylation (N-term)	HCD
M1_2_RB1_1_8832.d	KTLTS	F1:10979	5	92	92	5	549.325	1.1021-1.1185	0	548.317	2			HCD
M2-1_3_RB1_1_8839.d	TLEQLR	F5:16325	6	92	92	6	380.224	0.7702-0.7868	4566.2	758.429	5.1	P86272		HCD
M1_3_RB1_1_8834.d	LDERL	F2:25224	5	92	92	5	645.355	1.1965-1.2128	0	644.349	-2.4			HCD
M1_3_RB1_1_8834.d	APARPPPGGPGASAPLRP	F2:24708	18	92	92	18	555.98	0.8532-0.8698	8907.3	1664.91	3.9	A0A8C4N5V1:A0A8C4N1C2:A0A8C4PJ30:A0A8C4M4P4:A0A8C4N8C5:A0A8C4LUX7:A0A8C4M1X1:A0A8C4LF53:A0A8C4LF38:A0A8C4LBJ9:A0A8C4LGH9:A0A8C4L2K7:A0A8C4PQY9		HCD
M1_2_RB1_1_8832.d	EPKVK(+42.01)KTL	F1:28175	8	92	92	8	492.807	0.8325-0.8491	356.4	983.601	-1.5	A0A8C4KRY9	Acetylation (K)	HCD
M2-1_3_RB1_1_8839.d	DTKQ(+.98)LVSSKVS	F5:16448	11	92	92	11	596.829	0.9111-0.9277	601.25	1191.63	6.5		Deamidation (NQ)	HCD
M2-1_3_RB1_1_8839.d	M(+42.01)ERAE	F5:11154	5	92	92	5	677.292	1.1952-1.2114	0	676.285	0.3		Acetylation (N-term)	HCD
M2-1_3_RB1_1_8839.d	ELEELH	F5:16214	6	92	92	6	769.374	1.2762-1.2924	0	768.365	1.3			HCD
M1_2_RB1_1_8832.d	SLSYGLK	F1:27145	7	92	92	7	384.219	0.7397-0.7563	1545.3	766.423	2.4	A0A8C4LXL5		HCD
M1_2_RB1_1_8832.d	EKVQKF	F1:9145	6	92	92	6	389.727	0.7438-0.7605	51185	777.438	1.6	D2EC27		HCD
M2-1_3_RB1_1_8839.d	TPPMVVV	F5:30208	7	92	92	7	742.419	1.2425-1.2587	0	741.409	2.5	A0A8C4LBK3		HCD
M2-1_2_RB1_1_8837.d	TEEEL	F4:14470	5	92	92	5	620.281	1.1484-1.1647	0	619.27	5.4			HCD
M2-1_RB1_1_8659.d	EDKPDM	F6:11899	6	92	92	6	734.304	1.2452-1.2614	0	733.295	2.2			HCD
M2-1_RB1_1_8659.d	DESGPSLVH	F6:16573	9	92	92	9	940.437	1.2823-1.2985	0	939.43	0.2	A0A8C4L8B7:A0A8C4MA62		HCD
M2-1_3_RB1_1_8839.d	ELLKEK	F5:8266	6	92	92	6	380.236	0.7626-0.7792	127560	758.454	4.7	P86272:C3W972:A0A8C4M6N0:A0A8C4PQ06:A0A8C4M9C8:A0A8C4M5V6:A0A8C4N1R3:A0A8C4N0Z5:A0A8C4N0L6:A0A8C4MRJ8		HCD
M2-1_2_RB1_1_8837.d	EVQ(+.98)DPKSKKDA	F4:1392	11	92	92	11	623.321	0.9001-0.9167	1890.5	1244.62	2.5		Deamidation (NQ)	HCD
M1_3_RB1_1_8834.d	NDKLKKL	F2:8865	7	92	92	7	429.774	0.7792-0.7958	0	857.533	1	A0A8C4MD96:A0A8C4KWG8:A0A8C4MUH0		HCD
M1_RB1_1_8657.d	APPPPPP	F3:18115	7	92	92	7	672.367	1.2100-1.2263	0	671.364	-6.7	A0A8C4MTS8:A0A8C4LUM8:A0A8C4KXX4:A0A8C4M9E1:A0A8C4M3B4:A0A8C4LMY3:A0A8C4LNL1:A0A8C4LAX9:A0A8C4MD96:A0A8C4L5S0:A0A8C4LV13:A0A8C4LX24:A0A8C4LYB5:A0A8C4MZE5:A0A8C4LIZ6:A0A8C4LIA5:A0A8C4MVP1:A0A8C4MF50:A0A8C4MIB0:A0A8C4M7H9:A0A8C4MP75:A0A8C4L1M4:A0A8C4L0M4:A0A8C4MG23:A0A8C4MAY6:A0A8C4LUX7:A0A8C4NB56:A0A8C4MTY2:A0A8C4N2U9:A0A8C4LIL0:A0A8C4LI36:A0A8C4LI35:A0A8C4MLD5:A0A8C4MJU3:A0A8C4MMK2:A0A8C4PSM7:A0A…		HCD
M1_RB1_1_8657.d	DKLEE	F3:22766	5	92	92	5	633.312	1.1918-1.2080	0	632.302	4.6			HCD
M1_2_RB1_1_8832.d	TPKKPK	F1:1403	6	92	92	6	349.732	0.7529-0.7695	1857.8	697.449	1.2	A0A8C4MPW1:A0A8C4MUI6		HCD
M2-1_3_RB1_1_8839.d	DEKKKEW	F5:3577	7	92	92	7	481.753	0.8097-0.8263	298.88	961.487	4.9			HCD
M1_3_RB1_1_8834.d	SN(+.98)QN(+.98)PLTKT	F2:14464	9	92	92	9	502.75	0.8215-0.8381	223.11	1003.48	2.7		Deamidation (NQ)	HCD
M2-1_2_RB1_1_8837.d	ELDDTKVL	F4:24817	8	92	92	8	466.751	0.8090-0.8256	965.34	931.486	1.9			HCD
M2-1_RB1_1_8659.d	DGPGW	F6:22170	5	92	92	5	531.22	1.0353-1.0517	0	530.212	0.7			HCD
M1_RB1_1_8657.d	PGASAPLRP	F3:24647	9	92	92	9	433.248	0.7674-0.7841	3005.3	864.482	0.6	A0A8C4PJ30		HCD
M2-1_3_RB1_1_8839.d	EDLSKKL	F5:13278	7	92	92	7	416.745	0.7584-0.7751	0	831.47	5.7	A0A8C4PRH6:A0A8C4MJU3:A0A8C4MMK2:A0A8C4PSM7:A0A8C4MLT9:A0A8C4PSM5:A0A8C4LCP4:A0A8C4LG72:A0A8C4MEN5:A0A8C4MHT5		HCD
M1_2_RB1_1_8832.d	EVQNQQ(+.98)QPTEQ	F1:9837	11	92	92	11	665.3	0.9084-0.9249	1942.7	1328.58	1	A0A8C4PJH0:A0A8C4MEJ9:A0A8C4M6Y4:A0A8C4MQW4:A0A8C4PU43:A0A8C4LD35	Deamidation (NQ)	HCD
M2-1_3_RB1_1_8839.d	VEPNKKV	F5:8890	7	92	92	7	407.246	0.7577-0.7744	1418.7	812.476	1.9			HCD
M1_3_RB1_1_8834.d	SRVLEDRA	F2:12507	8	92	92	8	315.843	0.7049-0.7216	1930.2	944.504	2.4			HCD
M2-1_RB1_1_8659.d	EPPYS	F6:10041	5	92	92	5	592.26	1.0837-1.1001	0	591.254	-2			HCD
M2-1_3_RB1_1_8839.d	EDPKSDLKAA	F5:9837	10	92	92	10	537.279	0.8457-0.8622	1549.3	1072.54	3.7	A0A8C4M3K2:A0A8C4M1Q2		HCD
M1_RB1_1_8657.d	DTVVLR	F3:20430	6	92	92	6	702.417	1.2520-1.2681	0	701.407	3.9	A0A8C4LPN9		HCD
M1_2_RB1_1_8832.d	FPADF	F1:46407	5	92	92	5	596.275	1.1334-1.1497	0	595.264	6.5			HCD
M1_3_RB1_1_8834.d	TPKKPK	F2:1403	6	92	92	6	349.732	0.7535-0.7702	1580.2	697.449	2.4	A0A8C4MPW1:A0A8C4MUI6		HCD
M1_3_RB1_1_8834.d	VPYEP	F2:23182	5	92	92	5	604.301	1.1205-1.1368	0	603.29	4.7			HCD
M2-1_2_RB1_1_8837.d	EELKKL	F4:9616	6	92	92	6	380.235	0.7320-0.7487	398.27	758.454	1.9	A0A8C4N038:A0A8C4MYZ5:A0A8C4MWY8:A0A8C4N6K9:A0A8C4LTK2:A0A8C4LSJ3:A0A8C4LU33:A0A8C4KV50:A0A8C4MJ46:A0A8C4MJ21:A0A8C4PSI7:A0A8C4MJG8:A0A8C4PSI4		HCD
M2-1_2_RB1_1_8837.d	N(+.98)PVLRKL	F4:20083	7	92	92	7	420.769	0.7792-0.7958	578.08	839.523	0.2	A0A8C4MK65	Deamidation (NQ)	HCD
M2-1_2_RB1_1_8837.d	EEVPKKV	F4:5115	7	92	92	7	414.747	0.7681-0.7848	15581	827.475	4.4			HCD
M2-1_3_RB1_1_8839.d	GLPLTE	F5:27240	6	92	92	6	629.353	1.1789-1.1952	0	628.343	4.4			HCD
M1_2_RB1_1_8832.d	RPKLPH	F1:7209	6	92	92	6	747.464	1.2661-1.2823	0	746.455	2.2	P86272:C3W972		HCD
M2-1_2_RB1_1_8837.d	LPVLR	F4:22088	5	92	92	5	597.41	1.1762-1.1924	0	596.401	3.5			HCD
M1_3_RB1_1_8834.d	DVFVRKV	F2:25269	7	92	92	7	431.762	0.7841-0.8007	793.34	861.507	2.9	A0A8C4KVI9		HCD
M2-1_RB1_1_8659.d	DGDLSKKL	F6:11814	8	92	92	8	438.248	0.7813-0.7979	630.05	874.476	5.4	A0A8C4MJU3:A0A8C4MMK2:A0A8C4PSM7:A0A8C4MLT9:A0A8C4PSM5:A0A8C4MEN5:A0A8C4MHT5		HCD
M2-1_RB1_1_8659.d	DEYEETKKETL	F6:15103	11	92	92	11	692.83	0.9627-0.9792	495.46	1383.64	3.6	A0A8C4LC51		HCD
M2-1_2_RB1_1_8837.d	DELVKKL	F4:17954	7	92	92	7	422.762	0.7667-0.7834	678.57	843.506	4.7	A0A8C4L9Z3:A0A8C4LBK0:A0A8C4LEL1:A0A8C4LGW5:A0A8C4LB42:A0A8C4LJD7:A0A8C4LKU6		HCD
M1_RB1_1_8657.d	GPPTKKL	F3:6780	7	92	92	7	370.737	0.7403-0.7570	1450.4	739.459	-0.7	A0A8C4L8E3		HCD
M1_RB1_1_8657.d	ELVKKL	F3:15842	6	92	92	6	365.245	0.7390-0.7556	0	728.48	-5.5	A0A8C4L9Z3:A0A8C4LBK0:A0A8C4LEL1:A0A8C4LJD7:A0A8C4LKU6		HCD
M1_RB1_1_8657.d	GPPPP	F3:8794	5	92	92	5	464.248	0.9990-1.0154	0	463.243	-5.6			HCD
M1_2_RB1_1_8832.d	ALLRPLT	F1:37770	7	92	92	7	392.257	0.7910-0.8076	0	782.501	-2.4	A0A8C4L1P3		HCD
M1_3_RB1_1_8834.d	APRAPPPGGPGALAPLPR	F2:36250	18	92	92	18	564.664	0.8546-0.8712	40067	1690.96	3.6	A0A8C4N5V1:A0A8C4N1C2:A0A8C4M4P4:A0A8C4N8C5:A0A8C4MNZ6:A0A8C4MP05:A0A8C4N3Z1:A0A8C4LBJ9:A0A8C4LGH9		HCD
M2-1_RB1_1_8659.d	VPYPQ	F6:16024	5	92	92	5	603.317	1.1321-1.1484	0	602.306	6.3			HCD
M1_2_RB1_1_8832.d	APPPP	F1:9896	5	92	92	5	478.267	1.0038-1.0202	0	477.259	2.2			HCD
M1_2_RB1_1_8832.d	DPATQPLVPVHNPVLN	F1:48417	16	92	92	16	855.968	1.1178-1.1341	46222	1709.91	7	D2EC27		HCD
M2-1_RB1_1_8659.d	APFPE	F6:22803	5	92	92	5	560.272	1.0858-1.1021	0	559.264	1.5			HCD
M1_3_RB1_1_8834.d	TQSPFLPLVELPK	F2:56821	13	92	92	13	734.923	0.9963-1.0127	767.91	1467.83	-2.3	B7VGF9:A0A8C4MQ25:A0A8C4MN27:A0A8C4MLZ8:A0A8C4MUV4:A0A8C4MX15:A0A8C4MUN2		HCD
M1_RB1_1_8657.d	LPLLQK	F3:32749	6	92	92	6	356.242	0.7431-0.7598	63065	710.469	1	A0A8C4MSR3:A0A8C4MXA0		HCD
M1_RB1_1_8657.d	KHESTNLSQEKYK	F3:6644	13	92	92	13	531.275	0.8145-0.8311	5399.9	1590.8	2	B7VGF9:C1L3G3:A0A8C4MHP1:A0A8C4MKT7:A0A8C4MCS3		HCD
M1_2_RB1_1_8832.d	TTM(+15.99)DPQSHKVLL	F1:26134	12	92	92	12	693.362	1.0189-1.0353	907.89	1384.7	5.6	B7VGF9:A0A8C4MBA7	Oxidation (M)	HCD
M1_2_RB1_1_8832.d	DKLFRS	F1:15026	6	92	92	6	383.218	0.7494-0.7660	4295.8	764.418	5.1			HCD
M2-1_3_RB1_1_8839.d	S(+79.97)EEKVQKF	F5:12660	8	92	92	8	537.75	0.8339-0.8505	24215	1073.48	6.5	D2EC27:A0A8C4KT44:A0A8C4MNE2:A0A8C4MD75:A0A8C4PRJ1:A0A8C4MEB5:A0A8C4MCX6:A0A8C4PRX7	Phosphorylation (STY)	HCD
M2-1_2_RB1_1_8837.d	DDKLLK	F4:7934	6	92	92	6	366.219	0.7383-0.7549	804.16	730.423	2.7			HCD
M1_3_RB1_1_8834.d	KHESTAKDQEKY	F2:10215	12	92	92	12	732.361	0.9983-1.0148	1527.3	1462.71	2.3			HCD
M2-1_3_RB1_1_8839.d	EDKPDM	F5:11897	6	92	92	6	734.304	1.2547-1.2708	0	733.295	1.6			HCD
M1_2_RB1_1_8832.d	DN(+.98)KVLRF	F1:33795	7	92	92	7	446.746	0.7848-0.8014	397.37	891.481	-3.7		Deamidation (NQ)	HCD
M1_2_RB1_1_8832.d	PPPPYK	F1:28906	6	92	92	6	698.388	1.2506-1.2668	0	697.38	0.7			HCD
M2-1_2_RB1_1_8837.d	ELEELH	F4:16084	6	92	92	6	769.375	1.2654-1.2816	0	768.365	3.3			HCD
M1_2_RB1_1_8832.d	M(+15.99)PFLK	F1:23346	5	92	92	5	651.356	1.2067-1.2229	0	650.346	4.1		Oxidation (M)	HCD
M1_RB1_1_8657.d	APARPPPGGPGALAPLPR	F3:35668	18	92	92	18	564.662	0.8643-0.8808	39604	1690.96	0.3	A0A8C4N5V1:A0A8C4N1C2:A0A8C4M4P4:A0A8C4N8C5:A0A8C4LUX7:A0A8C4MNZ6:A0A8C4MP05:A0A8C4M1X1:A0A8C4N3Z1:A0A8C4LF53:A0A8C4LF38:A0A8C4LBJ9:A0A8C4LGH9:A0A8C4PQY9		HCD
M2-1_2_RB1_1_8837.d	DTQKVLK	F4:4429	7	92	92	7	416.251	0.7771-0.7938	374.64	830.486	1.5	A0A8C4MLY4:A0A8C4MMG4:A0A8C4MGS3:A0A8C4LSJ3:A0A8C4LU33		HCD
M1_RB1_1_8657.d	DN(+.98)GLSAAARKQ	F3:11347	11	92	92	11	566.292	0.8981-0.9146	1440.8	1130.57	2	A0A8C4MP75:A0A8C4LZI7:A0A8C4LSX9:A0A8C4LQG6:A0A8C4LSB3:A0A8C4LRV3	Deamidation (NQ)	HCD
M2-1_3_RB1_1_8839.d	KDLELTKEE	F5:15883	9	92	92	9	552.795	0.8691-0.8857	221.29	1103.57	3.5	A0A8C4LTE2:A0A8C4M6N0:A0A8C4PQ06:A0A8C4M9C8:A0A8C4M5V6		HCD
M2-1_3_RB1_1_8839.d	N(+42.01)PPKAPSKKE	F5:5432	10	92	92	10	569.318	0.8622-0.8788	1602.6	1136.62	2.9	A0A8C4M2F8:A0A8C4PP55:A0A8C4M526:A0A8C4PSX3	Acetylation (N-term)	HCD
M1_RB1_1_8657.d	VPYPQT	F3:23715	6	92	92	6	704.362	1.2574-1.2735	0	703.354	1.3			HCD
M1_RB1_1_8657.d	VEPNKKV	F3:11281	7	92	92	7	407.244	0.7633-0.7799	1704.3	812.476	-2			HCD
M1_RB1_1_8657.d	EEEKLLKL	F3:36306	8	92	92	8	501.295	0.8443-0.8608	186.13	1000.58	-5.8	A0A8C4L5S0:A0A8C4MLD5:A0A8C4MJU3:A0A8C4MMK2:A0A8C4PSM7:A0A8C4MLT9:A0A8C4PSM5:A0A8C4LUP4:A0A8C4LX95:A0A8C4KQI4:A0A8C4KS87:A0A8C4MDU2:A0A8C4L5V5:A0A8C4LA80:A0A8C4L409:A0A8C4MMY0:A0A8C4MLM0:A0A8C4MML9:A0A8C4MXX8:A0A8C4PSY6:A0A8C4MMW0		HCD
M1_3_RB1_1_8834.d	ELLKPK	F2:10982	6	92	92	6	364.241	0.7591-0.7757	548.22	726.464	5	A0A8C4KVW3:A0A8C4MYX8:A0A8C4N1D3:A0A8C4MU64:A0A8C4PU53:A0A8C4MSI2:A0A8C4MUN9:A0A8C4MRU4		HCD
M1_3_RB1_1_8834.d	DTLGGGKV	F2:17589	8	92	92	8	746.409	1.2601-1.2762	0	745.397	5.7			HCD
M1_3_RB1_1_8834.d	DSPFLK	F2:30210	6	92	92	6	706.38	1.2243-1.2405	0	705.37	3.6			HCD
M1_3_RB1_1_8834.d	LPLLQK	F2:33180	6	92	92	6	356.243	0.7355-0.7522	54807	710.469	2.9	A0A8C4MSR3:A0A8C4MXA0		HCD
M2-1_2_RB1_1_8837.d	EN(+.98)GDLKRL	F4:13146	8	92	92	8	473.256	0.8014-0.8180	259.71	944.493	5.2	A0A8C4M3J6	Deamidation (NQ)	HCD
M1_3_RB1_1_8834.d	ETLLPRK	F2:18473	7	92	92	7	428.767	0.8000-0.8166	33027	855.518	1			HCD
M1_2_RB1_1_8832.d	DNLSKV	F1:12465	6	92	92	6	675.369	1.1931-1.2094	0	674.36	3.2			HCD
M1_RB1_1_8657.d	LGADKYFHA	F3:27844	9	92	92	9	511.259	0.8691-0.8857	284	1020.5	-0.1	A0A8C4LEB1		HCD
M1_2_RB1_1_8832.d	PQSHKVLLRFLN	F1:40017	12	92	92	12	484.622	0.7695-0.7861	2186.9	1450.84	2	A0A8C4MBA7		HCD
M2-1_2_RB1_1_8837.d	KPKKPQTQ	F4:531	8	92	92	8	477.793	0.8201-0.8367	293.36	953.566	6	A0A8C4KT44:A0A8C4MRR0		HCD
M2-1_RB1_1_8659.d	HESTNLYYKYK	F6:8224	11	92	92	11	723.359	1.0175-1.0339	4443.6	1444.7	2.9			HCD
M1_3_RB1_1_8834.d	PLTKT	F2:4418	5	92	92	5	559.348	1.1802-1.1965	0	558.338	5.7			HCD
M1_RB1_1_8657.d	ELSQVKL	F3:28084	7	92	92	7	408.743	0.7889-0.8055	1757.7	815.475	-5	A0A8C4MQW4:A0A8C4PU43		HCD
M1_3_RB1_1_8834.d	DPESHKVLL	F2:28465	9	92	92	9	519.284	0.8671-0.8836	0	1036.56	-1.1			HCD
M1_3_RB1_1_8834.d	VEPNKKV	F2:11330	7	92	92	7	407.247	0.7556-0.7723	1570.3	812.476	4.3			HCD
M1_RB1_1_8657.d	VLPKRK	F3:3903	6	92	92	6	370.762	0.7813-0.7979	25371	739.507	3.9			HCD
M2-1_RB1_1_8659.d	ELLKEKTE	F6:10066	8	92	92	8	495.28	0.8491-0.8657	177.22	988.544	0.8	P86272:C3W972:A0A8C4M6N0:A0A8C4PQ06:A0A8C4M9C8:A0A8C4M5V6:A0A8C4N1R3:A0A8C4N0Z5:A0A8C4N0L6:A0A8C4MRJ8		HCD
M1_2_RB1_1_8832.d	GPNAVCAAKVLSDA	F1:41048	14	92	92	14	658.34	0.9318-0.9483	2917.5	1314.66	3.2	A0A8C4LEB1:A0A8C4N077		HCD
M1_3_RB1_1_8834.d	DTVKKL	F2:8764	6	92	92	6	352.221	0.7202-0.7369	2209.2	702.428	1	A0A8C4L1V5:A0A8C4L4B8:A0A8C4LYI3:A0A8C4M135:A0A8C4M712		HCD
M2-1_RB1_1_8659.d	DDEPAVKL	F6:25110	8	92	92	8	443.732	0.7861-0.8028	0	885.444	6.4			HCD
M1_RB1_1_8657.d	HESTNLS(+79.97)QEKY	F3:16732	11	92	92	11	708.297	0.9963-1.0127	111670	1414.58	1.8	B7VGF9:C1L3G3	Phosphorylation (STY)	HCD
M1_RB1_1_8657.d	EGSCCKGLDRLEEK	F3:15005	14	92	92	14	522.913	0.7855-0.8021	8415	1565.72	-0.6	A0A8C4MSR3:A0A8C4M7I4		HCD
M1_2_RB1_1_8832.d	EKVQKF	F1:9011	6	92	92	6	389.727	0.7369-0.7535	51185	777.438	1.6	D2EC27		HCD
M2-1_3_RB1_1_8839.d	SPLPN(+.98)LFPADFK	F5:32133	12	92	92	12	673.855	0.9792-0.9956	2333.8	1345.69	3.2	A0A8C4LDF2:A0A8C4LHM4:A0A8C4LGD8	Deamidation (NQ)	HCD
M1_2_RB1_1_8832.d	ELTVSSKV	F1:44232	8	92	92	8	431.748	0.7882-0.8049	628.43	861.481	0.1			HCD
M1_RB1_1_8657.d	EKVLK	F3:4079	5	92	92	5	308.703	0.7028-0.7195	761.87	615.395	-5.8			HCD
M2-1_2_RB1_1_8837.d	A(+42.01)EVEQKK	F4:5538	7	92	92	7	437.24	0.7889-0.8055	6316.1	872.46	4.7	A0A8C4MTT5:A0A8C4LRW5	Acetylation (N-term)	HCD
M2-1_3_RB1_1_8839.d	DPN(+.98)TKLSLPTQ	F5:25866	11	92	92	11	607.817	0.8822-0.8988	392.86	1213.62	-0.3	A0A8C4L8U6	Deamidation (NQ)	HCD
M1_3_RB1_1_8834.d	DAVRKL	F2:10222	6	92	92	6	351.22	0.7209-0.7376	2090.3	700.423	3.9	A0A8C4LD25		HCD
M2-1_RB1_1_8659.d	LPDKY	F6:12974	5	92	92	5	318.174	0.7049-0.7216	89889	634.333	1.7			HCD
M1_RB1_1_8657.d	LPDKY	F3:16104	5	92	92	5	318.173	0.7056-0.7223	26003	634.333	-0.9			HCD
M1_RB1_1_8657.d	PPPPPPP	F3:19224	7	92	92	7	698.387	1.2256-1.2418	0	697.38	-0.5	A0A8C4MTS8:A0A8C4LUM8:A0A8C4KXX4:A0A8C4M9E1:A0A8C4M3B4:A0A8C4LMY3:A0A8C4LNL1:A0A8C4LAX9:A0A8C4L5S0:A0A8C4LV13:A0A8C4LX24:A0A8C4LYB5:A0A8C4MZE5:A0A8C4LIZ6:A0A8C4LIA5:A0A8C4MVP1:A0A8C4MF50:A0A8C4MIB0:A0A8C4M7H9:A0A8C4MP75:A0A8C4L1M4:A0A8C4L0M4:A0A8C4MG23:A0A8C4MAY6:A0A8C4LUX7:A0A8C4NB56:A0A8C4MTY2:A0A8C4N2U9:A0A8C4LIL0:A0A8C4LI36:A0A8C4LI35:A0A8C4MLD5:A0A8C4MJU3:A0A8C4MMK2:A0A8C4PSM7:A0A8C4MLT9:A0A…		HCD
M2-1_RB1_1_8659.d	M(+42.01)DGFR	F6:26085	5	92	92	5	667.286	1.2263-1.2425	0	666.279	-0.9		Acetylation (N-term)	HCD
M2-1_RB1_1_8659.d	SKSRKF	F6:262	6	92	92	6	376.723	0.7313-0.7480	0	751.434	-4.7	A0A8C4LXL5		HCD
M1_3_RB1_1_8834.d	A(+42.01)STGPTKRQTL	F2:18155	11	92	92	11	601.333	0.9572-0.9737	8907.8	1200.65	4.8		Acetylation (N-term)	HCD
M2-1_2_RB1_1_8837.d	DLPNKKV	F4:8814	7	92	92	7	407.245	0.7570-0.7737	1296.1	812.476	1			HCD
M1_2_RB1_1_8832.d	KKATLHAVDVT	F1:15569	11	92	92	11	591.849	0.9139-0.9304	2453.4	1181.68	5.9	A0A8C4LSV0		HCD
M1_3_RB1_1_8834.d	VLQFSDK(+42.01)AHLDNLK	F2:52251	14	92	92	14	835.452	1.1599-1.1762	379.21	1668.88	3.9	A0A8C4PFM4:D1MPT0:A0A8C4MEI5:A0A8C4MEJ9:A0A8C4M6Y4	Acetylation (K)	HCD
M1_RB1_1_8657.d	ELDDTKVL	F3:33297	8	92	92	8	466.75	0.8221-0.8387	590.64	931.486	-1.4			HCD
M1_3_RB1_1_8834.d	HESTNLS(+79.97)QEKY	F2:16691	11	92	92	11	708.299	0.9696-0.9860	110000	1414.58	5.3	B7VGF9:C1L3G3	Phosphorylation (STY)	HCD
M1_3_RB1_1_8834.d	PPLKLPK	F2:25058	7	92	92	7	396.772	0.7445-0.7612	2963.3	791.527	3.8	A0A8C4MEG2:A0A8C4LZZ3:A0A8C4MPW1:A0A8C4MUI6		HCD
M2-1_2_RB1_1_8837.d	M(+15.99)TEEEEE	F4:7927	7	92	92	7	912.308	1.2796-1.2958	0	911.307	-6.4	A0A8C4LWJ6:A0A8C4N6M6	Oxidation (M)	HCD
M1_3_RB1_1_8834.d	TTMDPQSHKVLL	F2:33496	12	92	92	12	685.365	1.0230-1.0394	359.78	1368.71	6.8	B7VGF9:A0A8C4MBA7		HCD
M2-1_2_RB1_1_8837.d	LPPPPPP	F4:22567	7	92	92	7	357.714	0.7383-0.7549	5650	713.411	1.8	A0A8C4MTS8:A0A8C4LUM8:A0A8C4KXX4:A0A8C4M9E1:A0A8C4M3B4:A0A8C4LMY3:A0A8C4LNL1:A0A8C4LAX9:A0A8C4L5S0:A0A8C4LV13:A0A8C4M4P4:A0A8C4LX24:A0A8C4LYB5:A0A8C4MZE5:A0A8C4LIZ6:A0A8C4LIA5:A0A8C4MVP1:A0A8C4MF50:A0A8C4MIB0:A0A8C4M7H9:A0A8C4MP75:A0A8C4L1M4:A0A8C4L0M4:A0A8C4MG23:A0A8C4MAY6:A0A8C4M0R7:A0A8C4LUX7:A0A8C4NB56:A0A8C4MTY2:A0A8C4N2U9:A0A8C4LIL0:A0A8C4LI36:A0A8C4LRB2:A0A8C4LSK6:A0A8C4LI35:A0A8C4MLD5:A0A…		HCD
M1_3_RB1_1_8834.d	PPPPPP	F2:27783	6	92	92	6	601.338	1.1470-1.1633	0	600.327	6.7	A0A8C4MTS8:A0A8C4LUM8:A0A8C4KXX4:A0A8C4M9E1:A0A8C4M3B4:A0A8C4LMY3:A0A8C4LNL1:A0A8C4LAX9:A0A8C4L5S0:A0A8C4LV13:A0A8C4LX24:A0A8C4LYB5:A0A8C4MZE5:A0A8C4LIZ6:A0A8C4LIA5:A0A8C4MVP1:A0A8C4MF50:A0A8C4MIB0:A0A8C4M7H9:A0A8C4MP75:A0A8C4L1M4:A0A8C4L0M4:A0A8C4MG23:A0A8C4MAY6:A0A8C4LUX7:A0A8C4NB56:A0A8C4MTY2:A0A8C4N2U9:A0A8C4LIL0:A0A8C4LI36:A0A8C4LI35:A0A8C4MLD5:A0A8C4MJU3:A0A8C4MMK2:A0A8C4PSM7:A0A8C4MLT9:A0A…		HCD
M1_3_RB1_1_8834.d	EEN(+.98)KAFKQ	F2:6857	8	92	92	8	497.747	0.8049-0.8215	339.27	993.477	2.6	A0A8C4M686:A0A8C4MBZ9:A0A8C4MBY1	Deamidation (NQ)	HCD
M2-1_3_RB1_1_8839.d	SKSRKF	F5:348	6	92	92	6	376.725	0.7244-0.7410	0	751.434	2.3	A0A8C4LXL5		HCD
M1_3_RB1_1_8834.d	M(+15.99)PFLK	F2:23321	5	92	92	5	651.353	1.2073-1.2236	0	650.346	-0.2		Oxidation (M)	HCD
M1_RB1_1_8657.d	ELLKEK	F3:10348	6	92	92	6	380.235	0.7924-0.8090	63034	758.454	1.1	P86272:C3W972:A0A8C4M6N0:A0A8C4PQ06:A0A8C4M9C8:A0A8C4M5V6:A0A8C4N1R3:A0A8C4N0Z5:A0A8C4N0L6:A0A8C4MRJ8		HCD
M1_2_RB1_1_8832.d	STLTGVHM(+15.99)	F1:13938	8	92	92	8	431.213	0.7660-0.7827	1850.3	860.406	5.1	A0A8C4MSR3	Oxidation (M)	HCD
M2-1_3_RB1_1_8839.d	VEDLKKV	F5:20623	7	92	92	7	415.755	0.7647-0.7813	467.4	829.491	6.2			HCD
M1_2_RB1_1_8832.d	DLGGKV	F1:15063	6	92	92	6	588.337	1.1518-1.1680	0	587.328	4.1	P0DUB1:A0A8C4L7D7:A0A8C4PHR9		HCD
M1_3_RB1_1_8834.d	KPSYY	F2:11879	5	92	92	5	657.327	1.1897-1.2060	0	656.317	4.3			HCD
M1_RB1_1_8657.d	DN(+.98)LLRKV	F3:25849	7	92	92	7	429.755	0.7972-0.8138	0	857.497	-2.9		Deamidation (NQ)	HCD
M2-1_2_RB1_1_8837.d	SLSSKL	F4:16308	6	92	92	6	634.375	1.2297-1.2459	0	633.37	-3.6	A0A8C4MSR3:A0A8C4N8C5:A0A8C4LSJ3:A0A8C4LU33		HCD
M2-1_RB1_1_8659.d	DAQDKLY	F6:16312	7	92	92	7	852.413	1.2837-1.2998	0	851.403	3.4	A0A8C4MSR3:A0A8C4M4P4		HCD
M1_2_RB1_1_8832.d	LNHMRPR	F1:5081	7	92	92	7	462.256	0.7917-0.8083	0	922.492	5.9			HCD
M1_RB1_1_8657.d	TLTGVM(+15.99)H	F3:11781	7	92	92	7	774.379	1.2762-1.2924	0	773.374	-3.7	A0A8C4MSR3	Oxidation (M)	HCD
M1_3_RB1_1_8834.d	VTPVTK	F2:7588	6	92	92	6	644.398	1.1775-1.1938	0	643.39	1.1	A0A8C4LHK7		HCD
M1_3_RB1_1_8834.d	HESTNLS(+79.97)QEKY	F2:16897	11	92	92	11	708.299	0.9853-1.0018	110000	1414.58	5.3	B7VGF9:C1L3G3	Phosphorylation (STY)	HCD
M1_RB1_1_8657.d	EKVLK	F3:4104	5	92	92	5	616.402	1.1891-1.2053	0	615.395	-1.6			HCD
M1_2_RB1_1_8832.d	ETLLPRK	F1:18801	7	92	92	7	428.768	0.7785-0.7952	27044	855.518	3.5			HCD
M1_RB1_1_8657.d	TLEQLR	F3:20271	6	92	92	6	759.432	1.2850-1.3012	0	758.429	-5	P86272		HCD
M1_3_RB1_1_8834.d	LVHQHQTTM(+15.99)DPQSHKVLL	F2:20201	18	92	92	18	710.041	0.9833-0.9997	2484.2	2127.09	6	B7VGF9:A0A8C4MBA7	Oxidation (M)	HCD
M1_2_RB1_1_8832.d	A(+42.01)PPPDELVKKL	F1:50559	11	92	92	11	624.866	0.9325-0.9490	4255.9	1247.71	3.8	A0A8C4L9Z3:A0A8C4LBK0:A0A8C4LEL1:A0A8C4LGW5:A0A8C4LB42:A0A8C4LJD7:A0A8C4LKU6	Acetylation (N-term)	HCD
M1_2_RB1_1_8832.d	DEKARKL	F1:15245	7	92	92	7	430.251	0.7716-0.7882	242.38	858.492	-5.6	A0A8C4MJ24:A0A8C4M9C4:A0A8C4M868:A0A8C4MFW4:A0A8C4M9B6:A0A8C4MC57		HCD
M1_3_RB1_1_8834.d	EKPPP	F2:6828	5	92	92	5	567.313	1.1028-1.1191	0	566.306	-0.5			HCD
M1_2_RB1_1_8832.d	LPDLFPADFK	F1:56002	10	92	92	10	581.813	0.8905-0.9070	25117	1161.61	3.8			HCD
M1_RB1_1_8657.d	ETLLPKR	F3:18683	7	92	92	7	428.766	0.7938-0.8104	12270	855.518	-0.6	D2EC27		HCD
M1_3_RB1_1_8834.d	KPKLAKPKKA	F2:2840	10	92	92	10	554.883	0.8850-0.9015	0	1107.75	2.2	A0A8C4L7E5:A0A8C4LD74:A0A8C4L7B3:A0A8C4PSX3:A0A8C4KT44:A0A8C4L727:A0A8C4L5Z6		HCD
M2-1_3_RB1_1_8839.d	TEEAHKKA	F5:959	8	92	92	8	457.239	0.7737-0.7903	1278	912.466	-2.6			HCD
M2-1_RB1_1_8659.d	FLKQ(+.98)AGQGAKDM	F6:16530	12	92	92	12	647.827	0.9833-0.9997	7957.3	1293.64	1	A0A8C4LEB1:A0A8C4MG45:A0A8C4LHF4:A0A8C4MYG3:A0A8C4N418	Deamidation (NQ)	HCD
M1_RB1_1_8657.d	DLRPK	F3:5888	5	92	92	5	314.691	0.7056-0.7223	0	627.37	-3.4			HCD
M1_RB1_1_8657.d	SPLPN(+.98)LFPADFK	F3:56055	12	92	92	12	673.854	0.9757-0.9922	99611	1345.69	1.6	A0A8C4LDF2:A0A8C4LHM4:A0A8C4LGD8	Deamidation (NQ)	HCD
M1_2_RB1_1_8832.d	DGLLLR	F1:34665	6	92	92	6	686.42	1.2378-1.2540	0	685.412	0.2			HCD
M1_3_RB1_1_8834.d	LPVLEN	F2:36704	6	92	92	6	684.394	1.2344-1.2506	0	683.385	1.9	A0A8C4MXJ9		HCD
M1_RB1_1_8657.d	ELLVD	F3:37996	5	92	92	5	588.327	1.1782-1.1945	0	587.317	5.5			HCD
M1_3_RB1_1_8834.d	N(+42.01)PPKAPSKKE	F2:7595	10	92	92	10	569.319	0.8629-0.8795	2427.5	1136.62	4.8	A0A8C4M2F8:A0A8C4PP55:A0A8C4M526:A0A8C4PSX3	Acetylation (N-term)	HCD
M1_RB1_1_8657.d	EDKPDM	F3:14666	6	92	92	6	734.303	1.2607-1.2769	0	733.295	0.4			HCD
M2-1_RB1_1_8659.d	EDPKSDLKA	F6:9349	9	92	92	9	501.76	0.8263-0.8429	2950.1	1001.5	2.2			HCD
M1_3_RB1_1_8834.d	A(+42.01)PWVEHQDKL	F2:14493	10	92	92	10	422.217	0.7292-0.7459	17293	1263.62	3.8	D2EC27	Acetylation (N-term)	HCD
M2-1_3_RB1_1_8839.d	HESTNLSQEKYK	F5:6319	12	92	92	12	488.578	0.8076-0.8242	25955	1462.71	5	B7VGF9:C1L3G3:A0A8C4MHP1:A0A8C4MKT7:A0A8C4MCS3		HCD
M1_3_RB1_1_8834.d	RTVTQ(+.98)AVDATR	F2:15383	11	92	92	11	609.829	0.9345-0.9510	663.52	1217.64	6.1		Deamidation (NQ)	HCD
M1_RB1_1_8657.d	M(+42.01)DGFR	F3:36572	5	92	92	5	667.284	1.2330-1.2493	0	666.279	-3.9		Acetylation (N-term)	HCD
M2-1_2_RB1_1_8837.d	DPDKLEKL	F4:17166	8	92	92	8	479.268	0.8007-0.8173	220.46	956.518	3.4			HCD
M1_3_RB1_1_8834.d	LPRKL	F2:16369	5	92	92	5	313.722	0.7028-0.7195	3366.7	625.428	3.3			HCD
M1_RB1_1_8657.d	PPPYK	F3:15557	5	92	92	5	601.336	1.1334-1.1497	0	600.327	2.5			HCD
M1_3_RB1_1_8834.d	VKYAGATKGSHVKV	F2:3604	14	92	92	14	482.279	0.8180-0.8346	7502.7	1443.82	-2.2			HCD
M2-1_RB1_1_8659.d	DPVKKL	F6:7607	6	92	92	6	350.224	0.7139-0.7306	427.71	698.433	1.6	A0A8C4M5J3:A0A8C4M6R7		HCD
M1_3_RB1_1_8834.d	LPQYF	F2:47747	5	92	92	5	667.344	1.2270-1.2432	0	666.338	-1.7			HCD
M1_2_RB1_1_8832.d	KVLADTTRLVS	F1:27174	11	92	92	11	601.858	0.9524-0.9689	466.76	1201.7	-2.1	A0A8C4KZ97:A0A8C4PG14		HCD
M1_3_RB1_1_8834.d	HPLHFL	F2:38295	6	92	92	6	382.216	0.7674-0.7841	4144	762.418	0.8			HCD
M2-1_2_RB1_1_8837.d	M(+42.01)EVKPPP	F4:26326	7	92	92	7	839.432	1.2823-1.2985	0	838.426	-1	A0A8C4PVE1	Acetylation (N-term)	HCD
M1_RB1_1_8657.d	N(+.98)PVLRKL	F3:25313	7	92	92	7	420.77	0.8000-0.8166	1277.6	839.523	2.2	A0A8C4MK65	Deamidation (NQ)	HCD
M1_2_RB1_1_8832.d	LPRKL	F1:16550	5	92	92	5	313.723	0.7028-0.7195	3641.1	625.428	4.6			HCD
M2-1_3_RB1_1_8839.d	PPPPP	F5:9701	5	92	92	5	504.284	1.0161-1.0325	0	503.274	4.9			HCD
M2-1_2_RB1_1_8837.d	LPPPP	F4:20885	5	92	92	5	520.31	1.0414-1.0578	0	519.306	-5.5			HCD
M2-1_3_RB1_1_8839.d	KSSM(+15.99)KYK	F5:7662	7	92	92	7	444.235	0.7986-0.8152	4594.2	886.458	-2.6		Oxidation (M)	HCD
M1_3_RB1_1_8834.d	EYPTY	F2:25252	5	92	92	5	672.292	1.1877-1.2040	0	671.28	6.2			HCD
M2-1_2_RB1_1_8837.d	DEDKYL	F4:18203	6	92	92	6	391.683	0.7556-0.7723	62609	781.349	2.4	A0A8C4LXL5		HCD
M2-1_2_RB1_1_8837.d	EVTRKL	F4:5723	6	92	92	6	373.234	0.7362-0.7529	588.58	744.449	6.2			HCD
M2-1_RB1_1_8659.d	KHESTNLSQEKYK	F6:4485	13	92	92	13	531.275	0.8138-0.8304	8110.4	1590.8	2.4	B7VGF9:C1L3G3:A0A8C4MHP1:A0A8C4MKT7:A0A8C4MCS3		HCD
M1_RB1_1_8657.d	LPDKY	F3:15902	5	92	92	5	635.339	1.2046-1.2209	0	634.333	-2			HCD
M1_3_RB1_1_8834.d	NHFRPR	F2:3822	6	92	92	6	413.727	0.7626-0.7792	1346.3	825.436	3.9			HCD
M2-1_2_RB1_1_8837.d	EKPPP	F4:5131	5	92	92	5	567.315	1.1042-1.1205	0	566.306	2.1			HCD
M1_3_RB1_1_8834.d	APPKVRP	F2:9739	7	92	92	7	382.745	0.8159-0.8325	975.16	763.47	5.7			HCD
M1_2_RB1_1_8832.d	SLTDKLELTKEEKL	F1:38908	14	92	92	14	549.648	0.8381-0.8546	273.79	1645.91	5.2	A0A8C4M7I4:A0A8C4LTE2:A0A8C4M6N0:A0A8C4PQ06:A0A8C4M9C8:A0A8C4M5V6:A0A8C4MUK2		HCD
M2-1_2_RB1_1_8837.d	M(+42.01)LKEE	F4:21395	5	92	92	5	691.335	1.2438-1.2601	0	690.326	2.2		Acetylation (N-term)	HCD
M2-1_RB1_1_8659.d	APPPP	F6:7661	5	92	92	5	478.268	1.0243-1.0407	0	477.259	4.3			HCD
M2-1_RB1_1_8659.d	N(+.98)SSEERF	F6:11882	7	92	92	7	435.186	0.7764-0.7931	1248.1	868.356	1.5		Deamidation (NQ)	HCD
M1_3_RB1_1_8834.d	DKYHF	F2:11191	5	92	92	5	355.17	0.7410-0.7577	2039.6	708.323	3.5			HCD
M2-1_3_RB1_1_8839.d	ELEE	F5:6815	4	92	92	4	519.231	1.0387-1.0551	0	518.222	2.9			HCD
M2-1_3_RB1_1_8839.d	HESTNLYYKYK	F5:8229	11	92	92	11	723.36	1.0079-1.0243	5559	1444.7	4.2			HCD
M1_2_RB1_1_8832.d	KPKLVK	F1:3248	6	92	92	6	356.76	0.7403-0.7570	0	711.501	6.2	A0A8C4LUC6:A0A8C4M5X3:A0A8C4M7H7		HCD
M2-1_RB1_1_8659.d	CHNEEAVKKM	F6:14851	10	92	92	10	594.78	0.8802-0.8967	867.69	1187.54	3.1	A0A8C4M2L2:A0A8C4LZ68:A0A8C4PK01		HCD
M2-1_RB1_1_8659.d	VPQLE	F6:20286	5	92	92	5	585.328	1.1321-1.1484	0	584.317	6.9			HCD
M1_2_RB1_1_8832.d	DDKLLK	F1:10727	6	92	92	6	366.219	0.7424-0.7591	693.8	730.423	0			HCD
M2-1_3_RB1_1_8839.d	PPPPPPP	F5:15495	7	92	92	7	698.388	1.1945-1.2107	0	697.38	0.5	A0A8C4MTS8:A0A8C4LUM8:A0A8C4KXX4:A0A8C4M9E1:A0A8C4M3B4:A0A8C4LMY3:A0A8C4LNL1:A0A8C4LAX9:A0A8C4L5S0:A0A8C4LV13:A0A8C4LX24:A0A8C4LYB5:A0A8C4MZE5:A0A8C4LIZ6:A0A8C4LIA5:A0A8C4MVP1:A0A8C4MF50:A0A8C4MIB0:A0A8C4M7H9:A0A8C4MP75:A0A8C4L1M4:A0A8C4L0M4:A0A8C4MG23:A0A8C4MAY6:A0A8C4LUX7:A0A8C4NB56:A0A8C4MTY2:A0A8C4N2U9:A0A8C4LIL0:A0A8C4LI36:A0A8C4LI35:A0A8C4MLD5:A0A8C4MJU3:A0A8C4MMK2:A0A8C4PSM7:A0A8C4MLT9:A0A…		HCD
M1_2_RB1_1_8832.d	HSDAVSLCVLKPDPSQK	F1:39462	17	92	92	17	608.651	0.9084-0.9249	95011	1822.92	3.5	A0A8C4LXL5:A0A8C4MLW6		HCD
M1_3_RB1_1_8834.d	HPELLE	F2:22548	6	92	92	6	737.385	1.2425-1.2587	0	736.375	2.9			HCD
M2-1_RB1_1_8659.d	LPEW	F6:28538	4	92	92	4	544.276	1.0681-1.0844	0	543.269	-1.3			HCD
M2-1_3_RB1_1_8839.d	HPHLF	F5:19035	5	92	92	5	325.675	0.7278-0.7445	18114	649.334	2.3			HCD
M1_RB1_1_8657.d	HESTNLS(+79.97)QEYK	F3:16661	11	92	92	11	708.297	0.9792-0.9956	111670	1414.58	1.8	C1L3G3	Phosphorylation (STY)	HCD
M1_2_RB1_1_8832.d	QPLLPVR	F1:37062	7	92	92	7	411.765	0.8346-0.8512	217.82	821.512	3.1			HCD
M1_3_RB1_1_8834.d	APPPYK	F2:16686	6	92	92	6	672.371	1.2141-1.2303	0	671.364	-1.2			HCD
M1_RB1_1_8657.d	DNLSKV	F3:12262	6	92	92	6	675.368	1.2080-1.2243	0	674.36	0.6			HCD
M2-1_RB1_1_8659.d	LPPPTE	F6:14312	6	92	92	6	653.351	1.2019-1.2182	0	652.343	0.6			HCD
M1_RB1_1_8657.d	APARPPPGGPGALAPLPR	F3:35998	18	92	92	18	564.66	0.7820-0.7986	3548.8	1690.96	-2.8	A0A8C4N5V1:A0A8C4N1C2:A0A8C4M4P4:A0A8C4N8C5:A0A8C4LUX7:A0A8C4MNZ6:A0A8C4MP05:A0A8C4M1X1:A0A8C4N3Z1:A0A8C4LF53:A0A8C4LF38:A0A8C4LBJ9:A0A8C4LGH9:A0A8C4PQY9		HCD
M2-1_RB1_1_8659.d	PPPPPPP	F6:15453	7	91	91	7	698.387	1.2297-1.2459	0	697.38	-0.5	A0A8C4MTS8:A0A8C4LUM8:A0A8C4KXX4:A0A8C4M9E1:A0A8C4M3B4:A0A8C4LMY3:A0A8C4LNL1:A0A8C4LAX9:A0A8C4L5S0:A0A8C4LV13:A0A8C4LX24:A0A8C4LYB5:A0A8C4MZE5:A0A8C4LIZ6:A0A8C4LIA5:A0A8C4MVP1:A0A8C4MF50:A0A8C4MIB0:A0A8C4M7H9:A0A8C4MP75:A0A8C4L1M4:A0A8C4L0M4:A0A8C4MG23:A0A8C4MAY6:A0A8C4LUX7:A0A8C4NB56:A0A8C4MTY2:A0A8C4N2U9:A0A8C4LIL0:A0A8C4LI36:A0A8C4LI35:A0A8C4MLD5:A0A8C4MJU3:A0A8C4MMK2:A0A8C4PSM7:A0A8C4MLT9:A0A…		HCD
M2-1_3_RB1_1_8839.d	ELLKEK	F5:7763	6	91	91	6	380.237	0.7424-0.7591	0	758.454	6.7	P86272:C3W972:A0A8C4M6N0:A0A8C4PQ06:A0A8C4M9C8:A0A8C4M5V6:A0A8C4N1R3:A0A8C4N0Z5:A0A8C4N0L6:A0A8C4MRJ8		HCD
M1_RB1_1_8657.d	PPPPP	F3:13098	5	91	91	5	504.279	1.0182-1.0346	0	503.274	-5.6			HCD
M2-1_RB1_1_8659.d	DEARPKGPVS	F6:7121	10	91	91	10	528.277	0.8429-0.8595	3902.1	1054.54	-0.9			HCD
M1_2_RB1_1_8832.d	DKYHF	F1:11242	5	91	91	5	355.171	0.7376-0.7542	2151.6	708.323	5			HCD
M1_RB1_1_8657.d	EKPPP	F3:6658	5	91	91	5	567.316	1.1123-1.1287	0	566.306	4.3			HCD
M2-1_RB1_1_8659.d	DLPLVH	F6:25390	6	91	91	6	693.392	1.2330-1.2493	0	692.386	-1			HCD
M1_3_RB1_1_8834.d	PPPPPPPPP	F2:27720	9	91	91	9	446.75	0.7730-0.7896	549.06	891.485	0.5	A0A8C4MTS8:A0A8C4LUM8:A0A8C4KXX4:A0A8C4M9E1:A0A8C4M3B4:A0A8C4LMY3:A0A8C4LNL1:A0A8C4LAX9:A0A8C4L5S0:A0A8C4LV13:A0A8C4LX24:A0A8C4LYB5:A0A8C4MZE5:A0A8C4LIZ6:A0A8C4LIA5:A0A8C4MVP1:A0A8C4MF50:A0A8C4MIB0:A0A8C4M7H9:A0A8C4MP75:A0A8C4L1M4:A0A8C4L0M4:A0A8C4MG23:A0A8C4MAY6:A0A8C4LUX7:A0A8C4NB56:A0A8C4MTY2:A0A8C4N2U9:A0A8C4LIL0:A0A8C4LI36:A0A8C4LI35:A0A8C4MLD5:A0A8C4MJU3:A0A8C4MMK2:A0A8C4PSM7:A0A8C4MLT9:A0A…		HCD
M1_3_RB1_1_8834.d	P(+42.01)AAPEKPVKKQ	F2:11293	11	91	91	11	412.244	0.7181-0.7348	12623	1233.71	1.7	A0A8C4LD25:A0A8C4MF50:A0A8C4MIB0:A0A8C4M7H9	Acetylation (N-term)	HCD
M1_RB1_1_8657.d	APLKPHNSDS	F3:4203	10	91	91	10	533.27	0.8512-0.8677	827.91	1064.53	1.1			HCD
M1_3_RB1_1_8834.d	PPPPPP	F2:19877	6	91	91	6	601.335	1.1259-1.1422	0	600.327	1.6	A0A8C4MTS8:A0A8C4LUM8:A0A8C4KXX4:A0A8C4M9E1:A0A8C4M3B4:A0A8C4LMY3:A0A8C4LNL1:A0A8C4LAX9:A0A8C4L5S0:A0A8C4LV13:A0A8C4LX24:A0A8C4LYB5:A0A8C4MZE5:A0A8C4LIZ6:A0A8C4LIA5:A0A8C4MVP1:A0A8C4MF50:A0A8C4MIB0:A0A8C4M7H9:A0A8C4MP75:A0A8C4L1M4:A0A8C4L0M4:A0A8C4MG23:A0A8C4MAY6:A0A8C4LUX7:A0A8C4NB56:A0A8C4MTY2:A0A8C4N2U9:A0A8C4LIL0:A0A8C4LI36:A0A8C4LI35:A0A8C4MLD5:A0A8C4MJU3:A0A8C4MMK2:A0A8C4PSM7:A0A8C4MLT9:A0A…		HCD
M1_2_RB1_1_8832.d	LDPKKL	F1:11631	6	91	91	6	357.232	0.7320-0.7487	431.85	712.448	2.4			HCD
M2-1_RB1_1_8659.d	DEEKNF	F6:8484	6	91	91	6	781.337	1.2627-1.2789	0	780.329	1.5			HCD
M2-1_2_RB1_1_8837.d	EEN(+.98)KAFKQ	F4:4463	8	91	91	8	497.747	0.8104-0.8270	1849	993.477	2.7	A0A8C4M686:A0A8C4MBZ9:A0A8C4MBY1	Deamidation (NQ)	HCD
M1_3_RB1_1_8834.d	LPVPQT	F2:32169	6	91	91	6	654.383	1.2100-1.2263	0	653.375	1.4	A0A8C4LXD0		HCD
M2-1_3_RB1_1_8839.d	EEKLY	F5:14120	5	91	91	5	681.343	1.2161-1.2324	0	680.338	-3.6			HCD
M1_RB1_1_8657.d	KSRFK	F3:1771	5	91	91	5	333.207	0.7091-0.7258	1312	664.402	-4.7			HCD
M1_RB1_1_8657.d	LPTQ	F3:8617	4	91	91	4	458.26	0.9997-1.0161	0	457.254	-1			HCD
M1_2_RB1_1_8832.d	VPRKPPP	F1:5793	7	91	91	7	395.751	0.8145-0.8311	937.43	789.486	2.1			HCD
M2-1_3_RB1_1_8839.d	LPLPPPP	F5:30181	7	91	91	7	730.448	1.2681-1.2843	0	729.442	-1.7	A0A8C4M9E1:A0A8C4M3B4:A0A8C4LAX9:A0A8C4LV13:A0A8C4M4P4:A0A8C4LX24:A0A8C4LYB5:A0A8C4MVP1:A0A8C4MAY6:A0A8C4MTY2:A0A8C4N2U9:A0A8C4LRB2:A0A8C4LSK6:A0A8C4MHC3:A0A8C4MLD5:A0A8C4MJU3:A0A8C4MMK2:A0A8C4PSM7:A0A8C4MLT9:A0A8C4PSM5:A0A8C4LQX8:A0A8C4L7E4		HCD
M1_3_RB1_1_8834.d	LDDKKL	F2:7383	6	91	91	6	731.432	1.2816-1.2978	0	730.423	2.3			HCD
M2-1_2_RB1_1_8837.d	ELTKEE	F4:3837	6	91	91	6	374.69	0.7383-0.7549	2987.9	747.365	1.6	A0A8C4LTE2		HCD
M2-1_3_RB1_1_8839.d	DFDGKL	F5:22878	6	91	91	6	694.341	1.1640-1.1802	0	693.333	1	A0A8C4MNW2		HCD
M1_2_RB1_1_8832.d	SPPVVKL	F1:36385	7	91	91	7	370.24	0.7237-0.7403	403.39	738.464	0.6			HCD
M1_2_RB1_1_8832.d	PNVETLLPK	F1:30151	9	91	91	9	505.8	0.8332-0.8498	92142	1009.58	4	D2EC27:A0A8C4L992		HCD
M2-1_RB1_1_8659.d	EDDLR	F6:9906	5	91	91	5	647.3	1.1836-1.1999	0	646.292	0.9			HCD
M2-1_RB1_1_8659.d	DAGADKLY	F6:16273	8	91	91	8	426.709	0.7681-0.7848	37974	851.403	1.6	A0A8C4MDV6:A0A8C4MNE2:A0A8C4MD75:A0A8C4PRJ1:A0A8C4MEB5:A0A8C4PRY6:A0A8C4MCX6:A0A8C4MEJ3		HCD
M2-1_RB1_1_8659.d	TPKGEKFPSMS	F6:18194	11	91	91	11	604.803	0.8912-0.9077	2432.5	1207.59	1			HCD
M1_3_RB1_1_8834.d	ETLLPK	F2:26414	6	91	91	6	350.716	0.7313-0.7480	16240	699.417	1.7	D2EC27		HCD
M2-1_RB1_1_8659.d	HDVALEDA	F6:26039	8	91	91	8	435.206	0.7813-0.7979	273.11	868.393	5.7			HCD
M2-1_3_RB1_1_8839.d	M(+42.01)DGFR	F5:26499	5	91	91	5	667.29	1.2155-1.2317	0	666.279	4.2		Acetylation (N-term)	HCD
M1_3_RB1_1_8834.d	DN(+.98)GLSAAARKQ	F2:11437	11	91	91	11	566.292	0.8905-0.9070	1408.2	1130.57	2.1	A0A8C4MP75:A0A8C4LZI7:A0A8C4LSX9:A0A8C4LQG6:A0A8C4LSB3:A0A8C4LRV3	Deamidation (NQ)	HCD
M1_2_RB1_1_8832.d	LPTQTSQ	F1:10345	7	91	91	7	774.397	1.2742-1.2904	0	773.392	-3.2	A0A8C4LD23		HCD
M1_2_RB1_1_8832.d	HSDAVSLVFGKPDPSQK	F1:37344	17	91	91	17	604.65	0.9015-0.9180	12191	1810.92	3.5	A0A8C4LXL5:A0A8C4M2G4:A0A8C4LV00:A0A8C4LVE0:A0A8C4MXS9		HCD
M1_RB1_1_8657.d	EANYLGADKYFHA	F3:38459	13	91	91	13	749.852	1.0284-1.0448	7806	1497.69	0.2	A0A8C4LEB1:A0A8C4MGQ5		HCD
M1_RB1_1_8657.d	SPLPN(+.98)LFPADFK	F3:56053	12	91	91	12	673.855	0.9462-0.9627	11562	1345.69	2.7	A0A8C4LDF2:A0A8C4LHM4:A0A8C4LGD8	Deamidation (NQ)	HCD
M1_2_RB1_1_8832.d	V(+42.01)FVSRR	F1:30413	6	91	91	6	403.24	0.7709-0.7875	94.53	804.461	6.9		Acetylation (N-term)	HCD
M1_3_RB1_1_8834.d	KPCVVEKP	F2:8079	8	91	91	8	450.253	0.8152-0.8318	1254.2	898.495	-4.1	A0A8C4L147		HCD
M1_3_RB1_1_8834.d	DHFRRP	F2:6120	6	91	91	6	414.218	0.7716-0.7882	113.23	826.42	1.9			HCD
M1_3_RB1_1_8834.d	QDEDKYL	F2:23902	7	91	91	7	455.713	0.8007-0.8173	0	909.408	3.9	A0A8C4LXL5		HCD
M1_3_RB1_1_8834.d	QRELLK	F2:10668	6	91	91	6	393.747	0.7508-0.7674	6647.5	785.476	5.6	P86272:C3W972:A0A8C4LY35:A0A8C4PLI8:A0A8C4LSS1:A0A8C4LN05:A0A8C4LJR9:A0A8C4LDV7		HCD
M1_3_RB1_1_8834.d	FVTM(+15.99)QDKLRS	F2:5291	10	91	91	10	414.214	0.7487-0.7653	757.8	1239.63	-6		Oxidation (M)	HCD
M2-1_RB1_1_8659.d	SPLPDL	F6:29863	6	91	91	6	641.351	1.2033-1.2195	0	640.343	0.6	A0A8C4L6A6		HCD
M2-1_2_RB1_1_8837.d	P(+42.01)AAPEKPVKKQ	F4:8840	11	91	91	11	617.864	0.8988-0.9153	3056.5	1233.71	3.6	A0A8C4LD25:A0A8C4MF50:A0A8C4MIB0:A0A8C4M7H9	Acetylation (N-term)	HCD
M2-1_3_RB1_1_8839.d	PPPPPP	F5:14416	6	91	91	6	601.337	1.1334-1.1497	0	600.327	5	A0A8C4MTS8:A0A8C4LUM8:A0A8C4KXX4:A0A8C4M9E1:A0A8C4M3B4:A0A8C4LMY3:A0A8C4LNL1:A0A8C4LAX9:A0A8C4L5S0:A0A8C4LV13:A0A8C4LX24:A0A8C4LYB5:A0A8C4MZE5:A0A8C4LIZ6:A0A8C4LIA5:A0A8C4MVP1:A0A8C4MF50:A0A8C4MIB0:A0A8C4M7H9:A0A8C4MP75:A0A8C4L1M4:A0A8C4L0M4:A0A8C4MG23:A0A8C4MAY6:A0A8C4LUX7:A0A8C4NB56:A0A8C4MTY2:A0A8C4N2U9:A0A8C4LIL0:A0A8C4LI36:A0A8C4LI35:A0A8C4MLD5:A0A8C4MJU3:A0A8C4MMK2:A0A8C4PSM7:A0A8C4MLT9:A0A…		HCD
M1_3_RB1_1_8834.d	QLLPVRL	F2:45693	7	91	91	7	419.782	0.8083-0.8249	213.77	837.544	5.9			HCD
M1_RB1_1_8657.d	SQGAGHLQTR	F3:4979	10	91	91	10	527.773	0.8484-0.8650	1128	1053.53	0.4	A0A8C4MF50:A0A8C4MIB0:A0A8C4M7H9		HCD
M1_RB1_1_8657.d	SPAKPKAV	F3:5808	8	91	91	8	399.248	0.8083-0.8249	2563.5	796.481	2			HCD
M1_3_RB1_1_8834.d	LPDKY	F2:16079	5	91	91	5	635.342	1.1694-1.1857	0	634.333	3.6			HCD
M1_2_RB1_1_8832.d	LEEKKL	F1:11802	6	91	91	6	380.236	0.7445-0.7612	668.7	758.454	6.1	A0A8C4L6M2:A0A8C4PVC4		HCD
M1_2_RB1_1_8832.d	LPVLEKN	F1:27159	7	91	91	7	406.75	0.7515-0.7681	0	811.48	6.1			HCD
M1_3_RB1_1_8834.d	APPPP	F2:9829	5	91	91	5	478.264	1.0004-1.0168	0	477.259	-4.1			HCD
M1_RB1_1_8657.d	SGKDPNHFRPR	F3:6692	11	91	91	11	655.84	0.9496-0.9661	5024.8	1309.66	0.4	A0A8C4LEB1		HCD
M1_2_RB1_1_8832.d	TVSRKVDR	F1:26955	8	91	91	8	480.783	0.8450-0.8615	0	959.551	0.3			HCD
M2-1_RB1_1_8659.d	EDEGLKKL	F6:16680	8	91	91	8	466.259	0.8132-0.8298	249.36	930.502	0.8	A0A8C4M144:A0A8C4M816:A0A8C4MEI5:A0A8C4MEJ9:A0A8C4M6Y4:A0A8C4M530:A0A8C4KZY2		HCD
M2-1_2_RB1_1_8837.d	DTVKKL	F4:6093	6	91	91	6	352.222	0.7160-0.7327	4637.4	702.428	3.2	A0A8C4L1V5:A0A8C4L4B8:A0A8C4LYI3:A0A8C4M135:A0A8C4M712		HCD
M2-1_RB1_1_8659.d	TPWDQKT	F6:15245	7	91	91	7	438.217	0.7993-0.8159	4235.5	874.418	1.3			HCD
M2-1_2_RB1_1_8837.d	HESTNLSQEKYK	F4:6295	12	91	91	12	488.577	0.8215-0.8381	23969	1462.71	3.3	B7VGF9:C1L3G3:A0A8C4MHP1:A0A8C4MKT7:A0A8C4MCS3		HCD
M1_RB1_1_8657.d	LPKRKV	F3:3804	6	91	91	6	370.762	0.7820-0.7986	25371	739.507	3.9	D2EC27		HCD
M1_RB1_1_8657.d	VLKM(+15.99)SDGLAHLDNLK	F3:51533	15	91	91	15	557.302	0.8815-0.8981	667.74	1668.89	-1.1	A0A8C4PFM4:D1MPT0:A0A8C4LDF2:A0A8C4LHM4:A0A8C4LGD8	Oxidation (M)	HCD
M1_RB1_1_8657.d	EDPVVGKV	F3:9915	8	91	91	8	421.737	0.7688-0.7855	3089.8	841.455	5.2			HCD
M2-1_2_RB1_1_8837.d	EEVPKKV	F4:5041	7	91	91	7	414.747	0.7438-0.7605	15581	827.475	4.4			HCD
M1_3_RB1_1_8834.d	KPPKV	F2:4726	5	91	91	5	568.384	1.1341-1.1504	0	567.374	4.4			HCD
M1_3_RB1_1_8834.d	SLSSKRL	F2:11341	7	91	91	7	395.745	0.7827-0.7993	5052.2	789.471	4.8			HCD
M2-1_RB1_1_8659.d	S(+79.97)QEKYK	F6:290	6	91	91	6	431.689	0.7605-0.7771	0	861.363	0.7	C1L3G3:A0A8C4MHP1:A0A8C4MKT7:A0A8C4MCS3	Phosphorylation (STY)	HCD
M1_RB1_1_8657.d	EKAHPP	F3:6783	6	91	91	6	678.359	1.1938-1.2100	0	677.35	2.6			HCD
M2-1_RB1_1_8659.d	EDPVRKV	F6:7312	7	91	91	7	421.741	0.7681-0.7848	7054.1	841.466	2.1	A0A8C4MNB3		HCD
M1_2_RB1_1_8832.d	LDDKKL	F1:7360	6	91	91	6	366.22	0.7390-0.7556	1858.8	730.423	4.1			HCD
M1_2_RB1_1_8832.d	M(+42.01)M(+15.99)KHEGQQRQ	F1:3534	10	91	91	10	444.205	0.7417-0.7584	377.31	1329.59	0.2	D2EC27	Acetylation (N-term); Oxidation (M)	HCD
M1_RB1_1_8657.d	MPFLK	F3:37955	5	91	91	5	635.357	1.2141-1.2303	0	634.351	-1.6			HCD
M2-1_2_RB1_1_8837.d	Q(+.98)EVDKKL	F4:16993	7	91	91	7	430.74	0.7529-0.7695	0	859.465	1.1	A0A8C4LD25	Deamidation (NQ)	HCD
M2-1_RB1_1_8659.d	EVDKKL	F6:4735	6	91	91	6	366.22	0.7459-0.7626	12839	730.423	3.5	A0A8C4LD25		HCD
M1_2_RB1_1_8832.d	KGNLEYKEVVPLNTEQK	F1:31581	17	91	91	17	663.697	0.9084-0.9249	17570	1988.06	5.9	P86272:C3W972		HCD
M1_RB1_1_8657.d	APFPE	F3:30279	5	91	91	5	560.269	1.1042-1.1205	0	559.264	-5.2			HCD
M1_2_RB1_1_8832.d	ETLLKP	F1:27559	6	91	91	6	350.718	0.7209-0.7376	0	699.417	6			HCD
M1_3_RB1_1_8834.d	PPLKLP	F2:40071	6	91	91	6	332.725	0.7542-0.7709	2148	663.432	5.6	A0A8C4MEG2:A0A8C4LZZ3:A0A8C4MPW1:A0A8C4MUI6		HCD
M1_3_RB1_1_8834.d	ETLLPKRK	F2:12102	8	91	91	8	328.879	0.7230-0.7397	26640	983.613	3.7	D2EC27		HCD
M1_RB1_1_8657.d	DMREANYLGADK	F3:23169	12	91	91	12	691.824	1.0045-1.0209	0	1381.63	2.3	A0A8C4LEB1:A0A8C4MGQ5		HCD
M1_2_RB1_1_8832.d	A(+42.01)EEEQRKKL	F1:10382	9	91	91	9	586.82	0.9015-0.9180	564.4	1171.62	5.5	A0A8C4PJP9:A0A8C4LGI0:A0A8C4LH82:A0A8C4L9N3:A0A8C4LW79:A0A8C4LTV0:A0A8C4PHL7:A0A8C4MJ46:A0A8C4MJ21:A0A8C4PSI7:A0A8C4MJG8:A0A8C4PSI4:A0A8C4LTN8	Acetylation (N-term)	HCD
M2-1_3_RB1_1_8839.d	DDSLLRL	F5:30499	7	91	91	7	416.232	0.7757-0.7924	261.44	830.45	-0.5			HCD
M1_RB1_1_8657.d	APPVPRP	F3:17337	7	91	91	7	367.222	0.7841-0.8007	14804	732.428	0.7			HCD
M2-1_3_RB1_1_8839.d	LDKAEKL	F5:16980	7	91	91	7	408.745	0.7605-0.7771	1757.3	815.475	1	A0A8C4M393		HCD
M1_3_RB1_1_8834.d	P(+42.01)PAVPYPQRDTPVQA	F2:46700	15	91	91	15	839.439	1.0687-1.0851	37122	1676.85	6.5	D2EC27	Acetylation (N-term)	HCD
M1_2_RB1_1_8832.d	DAVSLCVLKPDPSQK	F1:42708	15	91	91	15	800.427	1.0824-1.0987	12402	1598.83	4.1	A0A8C4LXL5:A0A8C4MLW6		HCD
M2-1_RB1_1_8659.d	DQDPLTKT	F6:11723	8	91	91	8	459.233	0.7931-0.8097	9242.7	916.45	2.4	A0A8C4KZN3:A0A8C4L2D4		HCD
M1_RB1_1_8657.d	PLTKT	F3:4310	5	91	91	5	559.347	1.1802-1.1965	0	558.338	3.9			HCD
M1_3_RB1_1_8834.d	GLPDKY	F2:21587	6	91	91	6	692.364	1.2472-1.2634	0	691.354	4.2	A0A8C4LEB1		HCD
M1_2_RB1_1_8832.d	HALVPVH	F1:42633	7	91	91	7	772.442	1.2803-1.2964	0	771.439	-6.1			HCD
M2-1_3_RB1_1_8839.d	M(+42.01)EGAEEK	F5:11779	7	91	91	7	835.347	1.2789-1.2951	0	834.343	-3.2		Acetylation (N-term)	HCD
M1_3_RB1_1_8834.d	DARENAQRLTDRF	F2:29923	13	91	91	13	531.271	0.7931-0.8097	9286.9	1590.79	3.5	A0A8C4LEB1		HCD
M1_RB1_1_8657.d	DMLR	F3:13070	4	91	91	4	534.271	1.0967-1.1130	0	533.263	1.7			HCD
M2-1_2_RB1_1_8837.d	EPPYS	F4:9825	5	91	91	5	592.264	1.1083-1.1246	0	591.254	4.6			HCD
M2-1_RB1_1_8659.d	DRLEE	F6:4514	5	91	91	5	661.316	1.1830-1.1992	0	660.308	1.6			HCD
M2-1_3_RB1_1_8839.d	PPPPYK	F5:23504	6	91	91	6	698.386	1.2128-1.2290	0	697.38	-1.4			HCD
M1_RB1_1_8657.d	ELLKEK	F3:10328	6	91	91	6	380.235	0.7764-0.7931	63034	758.454	1.1	P86272:C3W972:A0A8C4M6N0:A0A8C4PQ06:A0A8C4M9C8:A0A8C4M5V6:A0A8C4N1R3:A0A8C4N0Z5:A0A8C4N0L6:A0A8C4MRJ8		HCD
M1_3_RB1_1_8834.d	NYLGADKYF	F2:42076	9	91	91	9	545.764	0.8519-0.8684	607.43	1089.51	0.8	A0A8C4LEB1:A0A8C4MGQ5		HCD
M1_RB1_1_8657.d	DAVRKL	F3:10169	6	91	91	6	351.221	0.7258-0.7424	2266.8	700.423	4.6	A0A8C4LD25		HCD
M1_3_RB1_1_8834.d	RTSVKVDR	F2:26988	8	91	91	8	480.783	0.8463-0.8629	0	959.551	0.4			HCD
M1_RB1_1_8657.d	ETLLPRK	F3:18242	7	91	91	7	428.765	0.7806-0.7972	1057	855.518	-2.7			HCD
M2-1_2_RB1_1_8837.d	PPPPP	F4:9687	5	91	91	5	504.284	1.0278-1.0442	0	503.274	4.9			HCD
M1_2_RB1_1_8832.d	WAQVNPGGAW	F1:25748	10	91	91	10	543.265	0.8173-0.8339	0	1084.51	5.4			HCD
M2-1_3_RB1_1_8839.d	DAAQRGPGGAW	F5:20298	11	91	91	11	543.262	0.8166-0.8332	16424	1084.5	4.6	A0A8C4LEB1		HCD
M1_2_RB1_1_8832.d	DPLLPK	F1:26531	6	91	91	6	682.415	1.2438-1.2601	0	681.406	1.8			HCD
M2-1_RB1_1_8659.d	A(+42.01)EVEQKK	F6:5564	7	91	91	7	437.239	0.8000-0.8166	6418.7	872.46	4	A0A8C4MTT5:A0A8C4LRW5	Acetylation (N-term)	HCD
M1_3_RB1_1_8834.d	GLPDKY	F2:21619	6	91	91	6	692.361	1.2290-1.2452	0	691.354	-0.8	A0A8C4LEB1		HCD
M1_RB1_1_8657.d	LVHQHQTTMPDGASHK	F3:6911	16	91	91	16	596.297	0.8608-0.8774	1727.8	1785.86	5.4	B7VGF9		HCD
M2-1_RB1_1_8659.d	EN(+.98)EETKKKLL	F6:16482	10	91	91	10	616.844	0.9490-0.9654	218.05	1231.67	6.1	A0A8C4M3J6:A0A8C4LZ41:A0A8C4LYI1:A0A8C4M487:A0A8C4M0J3:A0A8C4LXY7:A0A8C4LWN1	Deamidation (NQ)	HCD
M1_RB1_1_8657.d	HESTNLS(+79.97)EEKYK	F3:11927	12	91	91	12	772.836	1.0489-1.0653	16337	1543.66	0.9	C1L3G3:A0A8C4LTE2	Phosphorylation (STY)	HCD
M1_RB1_1_8657.d	PPPPYK	F3:36350	6	91	91	6	698.387	1.2668-1.2830	0	697.38	0.3			HCD
M1_3_RB1_1_8834.d	TLLPKR	F2:15027	6	91	91	6	364.246	0.7640-0.7806	1203.2	726.475	3.7	D2EC27		HCD
M1_3_RB1_1_8834.d	EDLTKKL	F2:32518	7	91	91	7	423.751	0.7896-0.8062	237.16	845.486	2.1	A0A8C4MTS8:A0A8C4MGS3		HCD
M2-1_RB1_1_8659.d	M(+42.01)DGFR	F6:26021	5	91	91	5	667.286	1.2249-1.2411	0	666.279	-0.9		Acetylation (N-term)	HCD
M2-1_2_RB1_1_8837.d	DLPLVH	F4:25686	6	91	91	6	693.394	1.2215-1.2378	0	692.386	1			HCD
M1_3_RB1_1_8834.d	KLELTKEEK	F2:10829	9	91	91	9	559.327	0.9125-0.9290	132.36	1116.64	0.4	A0A8C4LTE2:A0A8C4M6N0:A0A8C4PQ06:A0A8C4M9C8:A0A8C4M5V6:A0A8C4MUK2		HCD
M1_3_RB1_1_8834.d	KGNLEYKEVVPLNTEQK	F2:31525	17	91	91	17	663.697	0.9077-0.9242	16913	1988.06	5.1	P86272:C3W972		HCD
M2-1_3_RB1_1_8839.d	DRLEE	F5:4572	5	91	91	5	661.32	1.1728-1.1891	0	660.308	6.7			HCD
M2-1_RB1_1_8659.d	DEDGKKFKL	F6:16270	9	91	91	9	540.289	0.8615-0.8781	505.29	1078.57	-1.6	A0A8C4LPY8		HCD
M2-1_2_RB1_1_8837.d	DDPVLK	F4:11988	6	91	91	6	686.374	1.2040-1.2202	0	685.365	2.7	A0A8C4LIX9		HCD
M1_3_RB1_1_8834.d	HQTTMDPQSHKVLL	F2:27864	14	91	91	14	545.617	0.8263-0.8429	3574.8	1633.82	3	B7VGF9:A0A8C4MBA7		HCD
M1_2_RB1_1_8832.d	LTTKVGVAPA	F1:31743	10	91	91	10	478.795	0.8083-0.8249	10734	955.57	4.6			HCD
M2-1_2_RB1_1_8837.d	EEVDKKL	F4:16992	7	91	91	7	430.74	0.7834-0.8000	0	859.465	1.4	A0A8C4LD25		HCD
M1_3_RB1_1_8834.d	DPATQPLVVPHNPVLN	F2:48000	16	91	91	16	855.968	1.0810-1.0974	50206	1709.91	6.8	D2EC27		HCD
M1_3_RB1_1_8834.d	ELSQVLK	F2:28209	7	91	91	7	408.746	0.7799-0.7965	1879.8	815.475	2.3	P28546:A0A8C4KWV0		HCD
M2-1_2_RB1_1_8837.d	DTLGGGKV	F4:13804	8	91	91	8	746.404	1.2601-1.2762	0	745.397	0.4			HCD
M2-1_3_RB1_1_8839.d	VPLNTEK	F5:9025	7	91	91	7	400.73	0.7452-0.7619	1163.4	799.444	2.3	P86272:C3W972		HCD
M2-1_RB1_1_8659.d	VEKGPKV	F6:14237	7	91	91	7	378.737	0.7258-0.7424	211.49	755.454	6.2			HCD
M1_RB1_1_8657.d	DELKKVV	F3:17400	7	91	91	7	415.753	0.7771-0.7938	544.45	829.491	0.5	A0A8C4MKB7		HCD
M1_RB1_1_8657.d	DPATQPLVPVHNPVLN	F3:47351	16	91	91	16	855.966	1.0905-1.1069	54307	1709.91	4.8	D2EC27		HCD
M2-1_3_RB1_1_8839.d	GDTDTLH	F5:4692	7	91	91	7	758.328	1.2567-1.2729	0	757.324	-4.9	A0A8C4LD23		HCD
M1_3_RB1_1_8834.d	DLDQKP	F2:8601	6	91	91	6	715.364	1.2567-1.2729	0	714.355	2.5			HCD
M2-1_RB1_1_8659.d	DDSLLRL	F6:30250	7	91	91	7	416.232	0.7827-0.7993	247.24	830.45	-0.3			HCD
M2-1_RB1_1_8659.d	VKLSEADKKKV	F6:2597	11	91	91	11	415.59	0.7494-0.7660	212.51	1243.75	-2.4	A0A8C4M816		HCD
M2-1_3_RB1_1_8839.d	VPYPQ	F5:16320	5	91	91	5	603.313	1.1239-1.1402	0	602.306	-0.7			HCD
M1_RB1_1_8657.d	FRTF	F3:25895	4	91	91	4	570.301	1.1348-1.1511	0	569.296	-4.1			HCD
M1_2_RB1_1_8832.d	HESTNLS(+79.97)QEKY	F1:17029	11	91	91	11	708.3	0.9881-1.0045	57416	1414.58	5.8	B7VGF9:C1L3G3	Phosphorylation (STY)	HCD
M1_RB1_1_8657.d	RPPRP	F3:3361	5	91	91	5	311.693	0.7084-0.7251	0	621.371	0.3			HCD
M1_RB1_1_8657.d	DLDDLK	F3:21242	6	91	91	6	718.362	1.2587-1.2749	0	717.354	0	A0A8C4LKY4		HCD
M2-1_3_RB1_1_8839.d	G(+42.01)ERP	F5:4575	4	91	91	4	500.246	1.0202-1.0366	0	499.239	-0.9		Acetylation (N-term)	HCD
M2-1_2_RB1_1_8837.d	PPPPPP	F4:14148	6	91	91	6	601.335	1.1361-1.1524	0	600.327	1.8	A0A8C4MTS8:A0A8C4LUM8:A0A8C4KXX4:A0A8C4M9E1:A0A8C4M3B4:A0A8C4LMY3:A0A8C4LNL1:A0A8C4LAX9:A0A8C4L5S0:A0A8C4LV13:A0A8C4LX24:A0A8C4LYB5:A0A8C4MZE5:A0A8C4LIZ6:A0A8C4LIA5:A0A8C4MVP1:A0A8C4MF50:A0A8C4MIB0:A0A8C4M7H9:A0A8C4MP75:A0A8C4L1M4:A0A8C4L0M4:A0A8C4MG23:A0A8C4MAY6:A0A8C4LUX7:A0A8C4NB56:A0A8C4MTY2:A0A8C4N2U9:A0A8C4LIL0:A0A8C4LI36:A0A8C4LI35:A0A8C4MLD5:A0A8C4MJU3:A0A8C4MMK2:A0A8C4PSM7:A0A8C4MLT9:A0A…		HCD
M2-1_3_RB1_1_8839.d	EDKPDM	F5:11952	6	91	91	6	734.308	1.2533-1.2695	0	733.295	7			HCD
M1_3_RB1_1_8834.d	RAPLR	F2:6235	5	91	91	5	306.701	0.7160-0.7327	0	611.387	2.5			HCD
M2-1_3_RB1_1_8839.d	VPELE	F5:22092	5	91	91	5	586.309	1.1164-1.1327	0	585.301	1.9			HCD
M1_3_RB1_1_8834.d	M(+42.01)DGFR	F2:37141	5	91	91	5	667.289	1.2229-1.2391	0	666.279	3.9		Acetylation (N-term)	HCD
M1_3_RB1_1_8834.d	SLSSKL	F2:20542	6	91	91	6	634.378	1.2297-1.2459	0	633.37	1.7	A0A8C4MSR3:A0A8C4N8C5:A0A8C4LSJ3:A0A8C4LU33		HCD
M2-1_2_RB1_1_8837.d	DKLFRS	F4:11968	6	91	91	6	383.218	0.7424-0.7591	3610.6	764.418	5.5			HCD
M1_3_RB1_1_8834.d	DPNHFRPHGLPDKY	F2:25748	14	91	91	14	564.949	0.7965-0.8132	16808	1691.82	5.5	A0A8C4LEB1		HCD
M1_RB1_1_8657.d	SKSRKF	F3:1996	6	91	91	6	752.442	1.2803-1.2964	0	751.434	1.3	A0A8C4LXL5		HCD
M1_2_RB1_1_8832.d	ENPEVKL	F1:29021	7	91	91	7	414.728	0.7598-0.7764	605.85	827.439	1.9	A0A8C4L4E9:A0A8C4PHP3		HCD
M2-1_2_RB1_1_8837.d	HESTNLS(+79.97)QEKYK	F4:8699	12	91	91	12	772.344	1.0291-1.0455	387980	1542.67	1.4	B7VGF9:C1L3G3:A0A8C4MHP1:A0A8C4MKT7:A0A8C4MCS3	Phosphorylation (STY)	HCD
M1_2_RB1_1_8832.d	TLEQLR	F1:20410	6	91	91	6	380.223	0.7633-0.7799	3257.6	758.429	3.4	P86272		HCD
M1_3_RB1_1_8834.d	DAKSVKL	F2:14968	7	91	91	7	380.734	0.7139-0.7306	3574.4	759.449	5.9	A0A8C4MK03		HCD
M1_RB1_1_8657.d	TLEQLR	F3:20219	6	91	91	6	380.221	0.7730-0.7896	3431.1	758.429	-2.7	P86272		HCD
M2-1_3_RB1_1_8839.d	M(+42.01)EVKPPP	F5:26519	7	91	91	7	420.223	0.7487-0.7653	0	838.426	5.6	A0A8C4PVE1	Acetylation (N-term)	HCD
M2-1_3_RB1_1_8839.d	VQKFK	F5:2102	5	91	91	5	325.206	0.7070-0.7237	1185.6	648.396	2			HCD
M1_3_RB1_1_8834.d	HPHLF	F2:23790	5	91	91	5	650.341	1.1789-1.1952	0	649.334	0.3			HCD
M2-1_3_RB1_1_8839.d	LLEELKWK	F5:28627	8	91	91	8	529.819	0.8864-0.9029	183.51	1057.62	6.7	A0A8C4PJR0:A0A8C4KUH1:A0A8C4KVX9		HCD
M1_2_RB1_1_8832.d	PPPPPPP	F1:30938	7	91	91	7	698.388	1.2533-1.2695	0	697.38	1.7	A0A8C4MTS8:A0A8C4LUM8:A0A8C4KXX4:A0A8C4M9E1:A0A8C4M3B4:A0A8C4LMY3:A0A8C4LNL1:A0A8C4LAX9:A0A8C4L5S0:A0A8C4LV13:A0A8C4LX24:A0A8C4LYB5:A0A8C4MZE5:A0A8C4LIZ6:A0A8C4LIA5:A0A8C4MVP1:A0A8C4MF50:A0A8C4MIB0:A0A8C4M7H9:A0A8C4MP75:A0A8C4L1M4:A0A8C4L0M4:A0A8C4MG23:A0A8C4MAY6:A0A8C4LUX7:A0A8C4NB56:A0A8C4MTY2:A0A8C4N2U9:A0A8C4LIL0:A0A8C4LI36:A0A8C4LI35:A0A8C4MLD5:A0A8C4MJU3:A0A8C4MMK2:A0A8C4PSM7:A0A8C4MLT9:A0A…		HCD
M2-1_RB1_1_8659.d	EVVPLNTEK	F6:20094	9	91	91	9	514.784	0.8546-0.8712	4093.4	1027.55	-0.6	P86272:C3W972		HCD
M2-1_RB1_1_8659.d	EKVLK	F6:2119	5	91	91	5	616.401	1.1884-1.2046	0	615.395	-2.6			HCD
M1_3_RB1_1_8834.d	RVKEVK	F2:1609	6	91	91	6	379.75	0.7612-0.7778	4292.2	757.481	5.9	A0A8C4MSR3		HCD
M1_RB1_1_8657.d	ELLKEK	F3:10282	6	91	91	6	759.459	1.2796-1.2958	0	758.454	-2.7	P86272:C3W972:A0A8C4M6N0:A0A8C4PQ06:A0A8C4M9C8:A0A8C4M5V6:A0A8C4N1R3:A0A8C4N0Z5:A0A8C4N0L6:A0A8C4MRJ8		HCD
M1_RB1_1_8657.d	LSSSKL	F3:20375	6	91	91	6	634.375	1.2405-1.2567	0	633.37	-3			HCD
M1_3_RB1_1_8834.d	TPVTKL	F2:20001	6	91	91	6	329.711	0.7035-0.7202	0	657.406	1.2	A0A8C4LHK7		HCD
M2-1_2_RB1_1_8837.d	HQ(+.98)GQFREHAEHQDK	F4:1095	14	91	91	14	583.271	0.8608-0.8774	0	1746.78	5.3		Deamidation (NQ)	HCD
M1_3_RB1_1_8834.d	PPPKY	F2:15708	5	91	91	5	601.333	1.1307-1.1470	0	600.327	-2.6			HCD
M1_2_RB1_1_8832.d	TVTPVTKL	F1:31051	8	91	91	8	429.768	0.7806-0.7972	1395.3	857.522	-0.8	A0A8C4LHK7		HCD
M1_3_RB1_1_8834.d	TPVTKLE	F2:18043	7	91	91	7	394.231	0.7403-0.7570	460.9	786.449	-1.6	A0A8C4LHK7		HCD
M2-1_3_RB1_1_8839.d	EDKPDM	F5:11907	6	91	91	6	734.306	1.2324-1.2486	0	733.295	4.5			HCD
M1_RB1_1_8657.d	DPATQPLVPVHNPVLN	F3:47388	16	91	91	16	855.966	1.1055-1.1219	54307	1709.91	4.8	D2EC27		HCD
M1_3_RB1_1_8834.d	HALVPVHNPVLV	F2:56952	12	91	91	12	647.883	0.9545-0.9709	69723	1293.76	-3.9	D2EC27		HCD
M1_3_RB1_1_8834.d	LPEKPE	F2:11699	6	91	91	6	712.388	1.2506-1.2668	0	711.38	0.6	A0A8C4LD23		HCD
M2-1_RB1_1_8659.d	SPAKPKAV	F6:3830	8	91	91	8	399.248	0.8055-0.8221	3449	796.481	0.7			HCD
M2-1_3_RB1_1_8839.d	VDLKKV	F5:10770	6	91	91	6	351.233	0.7104-0.7271	328.49	700.448	3.2			HCD
M1_3_RB1_1_8834.d	ETLLPKHK	F2:11949	8	91	91	8	483.295	0.8581-0.8746	263.75	964.571	4.7	D2EC27:A0A8C4LA55		HCD
M2-1_3_RB1_1_8839.d	EKPPP	F5:4820	5	91	91	5	567.315	1.1069-1.1232	0	566.306	1.8			HCD
M2-1_2_RB1_1_8837.d	DDKLLK	F4:7890	6	91	91	6	731.426	1.2648-1.2810	0	730.423	-5			HCD
M1_RB1_1_8657.d	VPYPQ	F3:20015	5	91	91	5	603.31	1.1361-1.1524	0	602.306	-6			HCD
M1_3_RB1_1_8834.d	LPVLR	F2:28518	5	91	91	5	597.411	1.1809-1.1972	0	596.401	5.4			HCD
M2-1_RB1_1_8659.d	TPVTKL	F6:15773	6	91	91	6	658.417	1.2155-1.2317	0	657.406	5.2	A0A8C4LHK7		HCD
M1_3_RB1_1_8834.d	DWLSK(+42.01)LNVS(+79.97)	F2:14699	9	91	91	9	592.274	0.8864-0.9029	2904.8	1182.53	1.5		Acetylation (K); Phosphorylation (STY)	HCD
M1_2_RB1_1_8832.d	SKSRKF	F1:2082	6	91	91	6	752.441	1.2783-1.2944	0	751.434	0	A0A8C4LXL5		HCD
M2-1_RB1_1_8659.d	DKDAKF	F6:4649	6	91	91	6	362.187	0.7104-0.7271	2124.1	722.36	-0.5	A0A8C4LBN5		HCD
M1_3_RB1_1_8834.d	HLEVFLTS(+79.97)PLHELLSKHTH	F2:31610	19	91	91	19	580.298	0.8767-0.8932	8745	2317.16	1.3	A0A8C4PRH6:A0A8C4LWJ6:A0A8C4LRJ8:A0A8C4LH47:A0A8C4LJ06:A0A8C4LX73:A0A8C4LBK3	Phosphorylation (STY)	HCD
M1_RB1_1_8657.d	APRAPPPGGPGASAPLRP	F3:24588	18	91	91	18	555.979	0.8932-0.9098	73572	1664.91	3.4	A0A8C4N5V1:A0A8C4N1C2:A0A8C4PJ30:A0A8C4M4P4:A0A8C4N8C5:A0A8C4LBJ9:A0A8C4LGH9:A0A8C4L2K7		HCD
M1_2_RB1_1_8832.d	SPAKPKAV	F1:5954	8	91	91	8	399.248	0.7369-0.7535	1105.2	796.481	2			HCD
M1_RB1_1_8657.d	MPFLK	F3:38244	5	91	91	5	318.183	0.7292-0.7459	27359	634.351	1.9			HCD
M1_3_RB1_1_8834.d	EANYLAGDKYFHA	F2:39218	13	91	91	13	500.238	0.8298-0.8463	3436.5	1497.69	1.6	A0A8C4LEB1:A0A8C4LLM7		HCD
M1_2_RB1_1_8832.d	DLNLVRV	F1:44742	7	91	91	7	414.751	0.7653-0.7820	701.58	827.486	0.4	A0A8C4MU84		HCD
M1_RB1_1_8657.d	TPVTKL	F3:19752	6	91	91	6	329.71	0.7111-0.7278	391	657.406	-2.2	A0A8C4LHK7		HCD
M1_3_RB1_1_8834.d	ETLLKP	F2:26490	6	91	91	6	350.716	0.7737-0.7903	8053.7	699.417	2.3			HCD
M1_3_RB1_1_8834.d	HESTNLS(+79.97)QEKY	F2:16910	11	91	91	11	708.299	0.9942-1.0107	110000	1414.58	5.3	B7VGF9:C1L3G3	Phosphorylation (STY)	HCD
M1_RB1_1_8657.d	LKREKL	F3:6697	6	91	91	6	393.764	0.7563-0.7730	302.37	785.512	1.4	A0A8C4LTK2:A0A8C4LUP4:A0A8C4LX95		HCD
M1_RB1_1_8657.d	LPLLK	F3:30522	5	91	91	5	583.421	1.1877-1.2040	0	582.41	4.9			HCD
M2-1_3_RB1_1_8839.d	KHESTNLSQEK	F5:1850	11	91	91	11	650.83	0.9387-0.9551	700.78	1299.64	2.8	B7VGF9:C1L3G3		HCD
M1_2_RB1_1_8832.d	EDVPRKV	F1:10059	7	91	91	7	421.743	0.7605-0.7771	3062.1	841.466	5.6	A0A8C4LMV6		HCD
M1_RB1_1_8657.d	VM(+15.99)PFLK	F3:31144	6	91	91	6	375.715	0.7896-0.8062	3646.1	749.415	0.5	D2EC27	Oxidation (M)	HCD
M1_RB1_1_8657.d	YLKQLEKEHHSSSEKTS	F3:9158	17	91	91	17	677.677	0.8946-0.9111	7380	2030.01	1.2	C1L3G3:A0A8C4LQJ7:A0A8C4L4V2:A0A8C4M686:A0A8C4MBZ9:A0A8C4MBY1:A0A8C4LTN8		HCD
M1_3_RB1_1_8834.d	PELE	F2:13706	4	91	91	4	487.242	1.0250-1.0414	0	486.233	4			HCD
M2-1_2_RB1_1_8837.d	EEKVQKF	F4:8715	7	91	91	7	454.249	0.7806-0.7972	3995.7	906.481	3.3	D2EC27:A0A8C4KT44:A0A8C4MNE2:A0A8C4MD75:A0A8C4PRJ1:A0A8C4MEB5:A0A8C4MCX6:A0A8C4PRX7		HCD
M1_2_RB1_1_8832.d	QHHQTTMDPQSHKVLL	F1:24003	16	91	91	16	633.991	0.9469-0.9634	3365.3	1898.94	5.5	B7VGF9:A0A8C4MBA7		HCD
M1_3_RB1_1_8834.d	DVEKQKF	F2:14632	7	91	91	7	447.239	0.7792-0.7958	0	892.465	-2.7			HCD
M2-1_RB1_1_8659.d	PPLKLKP	F6:19617	7	91	91	7	396.771	0.7459-0.7626	311.05	791.527	1.4			HCD
M2-1_RB1_1_8659.d	DDDWLR	F6:25286	6	91	91	6	410.187	0.8000-0.8166	0	818.356	5.5	A0A8C4M1V4:A0A8C4M313:A0A8C4M305		HCD
M1_RB1_1_8657.d	LPDKY	F3:16597	5	91	91	5	318.173	0.7021-0.7188	26003	634.333	-0.9			HCD
M2-1_RB1_1_8659.d	DEELM(+15.99)E	F6:11789	6	91	91	6	781.288	1.2708-1.2870	0	780.285	-4.9	P13613:A0A8C4MHS2	Oxidation (M)	HCD
M1_2_RB1_1_8832.d	RPKLPH	F1:7139	6	91	91	6	374.237	0.7931-0.8097	160980	746.455	5	P86272:C3W972		HCD
M2-1_3_RB1_1_8839.d	APFPE	F5:23225	5	91	91	5	560.272	1.0742-1.0905	0	559.264	0.5			HCD
M1_2_RB1_1_8832.d	PPPPPPP	F1:35164	7	91	91	7	698.39	1.2540-1.2702	0	697.38	4.2	A0A8C4MTS8:A0A8C4LUM8:A0A8C4KXX4:A0A8C4M9E1:A0A8C4M3B4:A0A8C4LMY3:A0A8C4LNL1:A0A8C4LAX9:A0A8C4L5S0:A0A8C4LV13:A0A8C4LX24:A0A8C4LYB5:A0A8C4MZE5:A0A8C4LIZ6:A0A8C4LIA5:A0A8C4MVP1:A0A8C4MF50:A0A8C4MIB0:A0A8C4M7H9:A0A8C4MP75:A0A8C4L1M4:A0A8C4L0M4:A0A8C4MG23:A0A8C4MAY6:A0A8C4LUX7:A0A8C4NB56:A0A8C4MTY2:A0A8C4N2U9:A0A8C4LIL0:A0A8C4LI36:A0A8C4LI35:A0A8C4MLD5:A0A8C4MJU3:A0A8C4MMK2:A0A8C4PSM7:A0A8C4MLT9:A0A…		HCD
M1_3_RB1_1_8834.d	PPLKLP	F2:39925	6	91	91	6	332.725	0.7362-0.7529	2148	663.432	5.6	A0A8C4MEG2:A0A8C4LZZ3:A0A8C4MPW1:A0A8C4MUI6		HCD
M1_3_RB1_1_8834.d	LPSKKL	F2:9635	6	91	91	6	343.235	0.7077-0.7244	522.76	684.453	3.4	A0A8C4LE80:A0A8C4KUV5:A0A8C4KTL4		HCD
M1_RB1_1_8657.d	TM(+15.99)VAYSPFHD	F3:37642	10	91	91	10	592.261	0.9167-0.9332	570.38	1182.5	5.7	P86272:C3W972	Oxidation (M)	HCD
M2-1_3_RB1_1_8839.d	HQ(+.98)GAGQQREVEHQD	F5:1672	14	91	91	14	540.574	0.8532-0.8698	179910	1618.71	-4.5	D2EC27	Deamidation (NQ)	HCD
M2-1_RB1_1_8659.d	DDNLN(+.98)DDLSCCS	F6:23123	12	91	91	12	657.729	0.9228-0.9393	1407.7	1313.44	3.7		Deamidation (NQ)	HCD
M1_2_RB1_1_8832.d	LPVLHL	F1:47647	6	91	91	6	346.231	0.7459-0.7626	5156.6	690.443	5.8			HCD
M1_RB1_1_8657.d	KEVGQYKEVVPLNTEQK	F3:31140	17	91	91	17	663.695	0.9201-0.9366	17157	1988.06	3.1	P86272:C3W972		HCD
M2-1_RB1_1_8659.d	DLEELK	F6:16416	6	91	91	6	746.391	1.2526-1.2688	0	745.386	-2.1			HCD
M1_3_RB1_1_8834.d	HESTNLS(+79.97)QEKYK	F2:10564	12	91	91	12	772.344	1.0319-1.0483	251380	1542.67	1.2	B7VGF9:C1L3G3:A0A8C4MHP1:A0A8C4MKT7:A0A8C4MCS3	Phosphorylation (STY)	HCD
M2-1_2_RB1_1_8837.d	ELTKEE	F4:3827	6	91	91	6	748.37	1.2560-1.2722	0	747.365	-3.1	A0A8C4LTE2		HCD
M2-1_3_RB1_1_8839.d	VEDLPNKKV	F5:21758	9	91	91	9	521.304	0.8553-0.8719	4136.4	1040.59	6.4			HCD
M1_2_RB1_1_8832.d	DGN(+.98)KPVRM	F1:11933	8	91	91	8	459.231	0.7792-0.7958	3043.5	916.444	5.2		Deamidation (NQ)	HCD
M1_RB1_1_8657.d	FPADKF	F3:30796	6	91	91	6	362.686	0.7424-0.7591	3608.5	723.359	-1.9			HCD
M1_RB1_1_8657.d	WKKATLHAVDVT	F3:25056	12	91	91	12	684.888	1.0059-1.0223	749.08	1367.76	4.4	A0A8C4LSV0		HCD
M1_3_RB1_1_8834.d	SPLPN(+.98)LFPADFK	F2:57072	12	91	91	12	673.855	0.9352-0.9517	16693	1345.69	3.3	A0A8C4LDF2:A0A8C4LHM4:A0A8C4LGD8	Deamidation (NQ)	HCD
M1_3_RB1_1_8834.d	DGN(+.98)KPVRM	F2:11796	8	91	91	8	459.231	0.7799-0.7965	3222.4	916.444	3.8		Deamidation (NQ)	HCD
M1_RB1_1_8657.d	VDFVKRV	F3:25168	7	91	91	7	431.762	0.7958-0.8125	870.05	861.507	1.8			HCD
M1_2_RB1_1_8832.d	VAPFVEP	F1:50938	7	91	91	7	758.411	1.2729-1.2890	0	757.401	3.7			HCD
M1_RB1_1_8657.d	NLEYKEVVPLNTEQ	F3:42668	14	91	91	14	838.432	1.0742-1.0905	2319.6	1674.85	1.4	P86272:C3W972		HCD
M1_3_RB1_1_8834.d	VLPKRK	F2:4111	6	91	91	6	370.762	0.7674-0.7841	22052	739.507	3.6			HCD
M1_RB1_1_8657.d	QRELLK	F3:10605	6	91	91	6	393.747	0.7591-0.7757	8235.4	785.476	4.9	P86272:C3W972:A0A8C4LY35:A0A8C4PLI8:A0A8C4LSS1:A0A8C4LN05:A0A8C4LJR9:A0A8C4LDV7		HCD
M1_2_RB1_1_8832.d	EDKPDM	F1:14924	6	91	91	6	734.302	1.2486-1.2648	0	733.295	-0.1			HCD
M1_3_RB1_1_8834.d	A(+42.01)STGPTKRQTL	F2:18038	11	91	91	11	601.333	0.9565-0.9730	8907.8	1200.65	4.8		Acetylation (N-term)	HCD
M1_RB1_1_8657.d	APPVPRP	F3:15658	7	91	91	7	367.222	0.7882-0.8049	14804	732.428	0.7			HCD
M1_3_RB1_1_8834.d	PPPPKY	F2:27050	6	91	91	6	698.386	1.2202-1.2364	0	697.38	-1.7			HCD
M2-1_RB1_1_8659.d	DTVKKL	F6:6112	6	91	91	6	703.439	1.2553-1.2715	0	702.428	5.9	A0A8C4L1V5:A0A8C4L4B8:A0A8C4LYI3:A0A8C4M135:A0A8C4M712		HCD
M1_RB1_1_8657.d	ELTKERT	F3:3147	7	91	91	7	438.741	0.8076-0.8242	5731	875.471	-5.1			HCD
M2-1_RB1_1_8659.d	DLDDKLLK	F6:20379	8	91	91	8	480.273	0.8429-0.8595	1206	958.533	-1.8			HCD
M2-1_2_RB1_1_8837.d	EVDKKL	F4:4705	6	91	91	6	366.221	0.7376-0.7542	13286	730.423	5.7	A0A8C4LD25		HCD
M2-1_2_RB1_1_8837.d	PPPPYK	F4:16850	6	91	91	6	698.39	1.2175-1.2337	0	697.38	4.4			HCD
M1_RB1_1_8657.d	A(+42.01)EEVEQ(+.98)ERLK	F3:29195	10	91	91	10	637.32	0.9771-0.9935	545.8	1272.62	4.2		Acetylation (N-term); Deamidation (NQ)	HCD
M1_2_RB1_1_8832.d	P(+42.01)ALLDGVKGGTKE	F1:40168	13	91	91	13	663.869	0.9929-1.0093	249.73	1325.72	3.5	A0A8C4M895:A0A8C4M4W9:A0A8C4PKI3	Acetylation (N-term)	HCD
M1_3_RB1_1_8834.d	DLRHNKDRKV	F2:3163	10	91	91	10	427.578	0.7084-0.7251	2653.1	1279.71	0.9			HCD
M1_RB1_1_8657.d	KPEFR	F3:6401	5	91	91	5	338.693	0.7264-0.7431	210.8	675.37	2.8			HCD
M2-1_RB1_1_8659.d	EDKPDM	F6:11825	6	91	91	6	734.306	1.2648-1.2810	0	733.295	4.6			HCD
M2-1_2_RB1_1_8837.d	Q(+.98)DGHVKV	F4:5869	7	91	91	7	392.204	0.7376-0.7542	4960.1	782.392	2.7		Deamidation (NQ)	HCD
M1_3_RB1_1_8834.d	EKPPP	F2:7063	5	91	91	5	567.312	1.0865-1.1028	0	566.306	-2.4			HCD
M2-1_2_RB1_1_8837.d	FPADF	F4:29126	5	91	91	5	596.273	1.1171-1.1334	0	595.264	2.8			HCD
M2-1_3_RB1_1_8839.d	RLEDRA	F5:2161	6	91	91	6	380.211	0.7688-0.7855	320.52	758.403	3.9			HCD
M1_3_RB1_1_8834.d	APPVPRP	F2:14669	7	91	91	7	367.222	0.7806-0.7972	14670	732.428	2.5			HCD
M1_RB1_1_8657.d	HPLHFL	F3:38088	6	91	91	6	382.216	0.7751-0.7917	3675	762.418	-1.1			HCD
M2-1_2_RB1_1_8837.d	APPPP	F4:7664	5	91	91	5	478.266	1.0154-1.0319	0	477.259	0			HCD
M2-1_3_RB1_1_8839.d	DERFF	F5:27162	5	91	91	5	713.329	1.2202-1.2364	0	712.318	5.5			HCD
M2-1_3_RB1_1_8839.d	DLPLVH	F5:25811	6	91	91	6	693.391	1.2202-1.2364	0	692.386	-2.8			HCD
M2-1_3_RB1_1_8839.d	HPHLF	F5:18982	5	91	91	5	325.675	0.7285-0.7452	18114	649.334	2.3			HCD
M1_RB1_1_8657.d	PKKAAKPKLAKP	F3:6854	12	91	91	12	426.287	0.8090-0.8256	409.1	1275.84	-0.9	A0A8C4L7E5:A0A8C4LD74:A0A8C4L7B3:A0A8C4LMJ3:A0A8C4LI26:A0A8C4LRB2:A0A8C4LSK6		HCD
M1_3_RB1_1_8834.d	HESTNLS(+79.97)EEKY	F2:18017	11	90	90	11	708.79	0.9778-0.9942	4770.7	1415.56	4.2	C1L3G3:A0A8C4LTE2	Phosphorylation (STY)	HCD
M1_RB1_1_8657.d	WPEL	F3:50865	4	90	90	4	544.279	1.0980-1.1144	0	543.269	5.4			HCD
M1_RB1_1_8657.d	EN(+.98)KYLK	F3:8224	6	90	90	6	398.217	0.7834-0.8000	157.67	794.417	1.7		Deamidation (NQ)	HCD
M2-1_2_RB1_1_8837.d	APPVPRP	F4:13920	7	90	90	7	367.224	0.7174-0.7341	139.26	732.428	6.7			HCD
M2-1_2_RB1_1_8837.d	DNKQLLR	F4:8066	7	90	90	7	443.761	0.7764-0.7931	283.99	885.503	4.1			HCD
M1_2_RB1_1_8832.d	DAAGARLQ	F1:8970	8	90	90	8	401.214	0.7529-0.7695	0	800.414	-0.6	A0A8C4MYQ2		HCD
M2-1_2_RB1_1_8837.d	TDEEKNFKA	F4:8630	9	90	90	9	541.262	0.8526-0.8691	206.14	1080.51	1			HCD
M2-1_2_RB1_1_8837.d	DLDQKP	F4:6150	6	90	90	6	715.365	1.2580-1.2742	0	714.355	4			HCD
M1_2_RB1_1_8832.d	CPEPVKQPSVVDRK(+42.01)	F1:35042	14	90	90	14	812.43	1.0517-1.0681	12445	1622.85	0.4	A0A8C4MSR3:A0A8C4MXA0:A0A8C4N7B7:A0A8C4MIZ0:A0A8C4KYA4:A0A8C4L2P2	Acetylation (K)	HCD
M2-1_2_RB1_1_8837.d	LN(+.98)NLRRL	F4:22649	7	90	90	7	450.276	0.8145-0.8311	425.37	898.535	3.8		Deamidation (NQ)	HCD
M2-1_RB1_1_8659.d	HESTNLS(+79.97)QEKYK	F6:8147	12	90	90	12	772.343	1.0503-1.0667	408540	1542.67	0.5	B7VGF9:C1L3G3:A0A8C4MHP1:A0A8C4MKT7:A0A8C4MCS3	Phosphorylation (STY)	HCD
M2-1_2_RB1_1_8837.d	HESTNLYYKYK	F4:8130	11	90	90	11	723.358	1.0072-1.0237	6086.2	1444.7	2.1			HCD
M2-1_3_RB1_1_8839.d	RTPPP	F5:6216	5	90	90	5	567.322	1.1069-1.1232	0	566.318	-5.6			HCD
M2-1_RB1_1_8659.d	DPPME	F6:11323	5	90	90	5	588.233	1.0940-1.1103	0	587.226	-1.3			HCD
M2-1_3_RB1_1_8839.d	ETLLPK	F5:20781	6	90	90	6	350.717	0.7730-0.7896	75121	699.417	3	D2EC27		HCD
M1_RB1_1_8657.d	VM(+15.99)PFLK	F3:31100	6	90	90	6	375.715	0.7903-0.8069	3646.1	749.415	0.5	D2EC27	Oxidation (M)	HCD
M1_2_RB1_1_8832.d	MPFLK	F1:39049	5	90	90	5	318.183	0.7313-0.7480	19654	634.351	1			HCD
M2-1_2_RB1_1_8837.d	PPPPP	F4:9787	5	90	90	5	504.284	1.0086-1.0250	0	503.274	4.9			HCD
M2-1_3_RB1_1_8839.d	EEVDKKL	F5:17154	7	90	90	7	430.741	0.7861-0.8028	388.01	859.465	2.8	A0A8C4LD25		HCD
M1_RB1_1_8657.d	DVEKQKF	F3:14572	7	90	90	7	447.238	0.7889-0.8055	0	892.465	-3.5			HCD
M1_2_RB1_1_8832.d	QLLPVLR	F1:46047	7	90	90	7	419.781	0.8083-0.8249	364.35	837.544	5.4	B7VGF9		HCD
M1_RB1_1_8657.d	APYAYPPP	F3:19775	8	90	90	8	438.219	0.7875-0.8042	1335.1	874.422	1.8			HCD
M2-1_3_RB1_1_8839.d	KPPLL	F5:23538	5	90	90	5	567.385	1.1246-1.1409	0	566.379	-2.2			HCD
M1_2_RB1_1_8832.d	QRELLK	F1:10703	6	90	90	6	393.748	0.7515-0.7681	6255	785.476	5.9	P86272:C3W972:A0A8C4LY35:A0A8C4PLI8:A0A8C4LSS1:A0A8C4LN05:A0A8C4LJR9:A0A8C4LDV7		HCD
M1_2_RB1_1_8832.d	LPLSK(+42.01)DKPVF	F1:53586	10	90	90	10	593.345	0.9070-0.9235	0	1184.68	-4	A0A8C4MVL3	Acetylation (K)	HCD
M2-1_RB1_1_8659.d	DLDDLK	F6:16784	6	90	90	6	718.366	1.2574-1.2735	0	717.354	6.5	A0A8C4LKY4		HCD
M2-1_RB1_1_8659.d	DKLFRS	F6:12109	6	90	90	6	383.215	0.7473-0.7640	3560.2	764.418	-2.3			HCD
M2-1_3_RB1_1_8839.d	N(+42.01)(+.98)SEGLPEKL	F5:26776	9	90	90	9	515.261	0.8325-0.8491	0	1028.5	4.2	A0A8C4M4P4	Acetylation (N-term); Deamidation (NQ)	HCD
M1_2_RB1_1_8832.d	FSKKRS	F1:2104	6	90	90	6	376.726	0.7549-0.7716	30483	751.434	3.4			HCD
M1_2_RB1_1_8832.d	EDPVRKV	F1:9963	7	90	90	7	421.743	0.7605-0.7771	3062.1	841.466	5.6	A0A8C4MNB3		HCD
M1_RB1_1_8657.d	RPRGPL	F3:11201	6	90	90	6	348.219	0.7084-0.7251	102030	694.424	0.9			HCD
M1_2_RB1_1_8832.d	ETLLPK	F1:26456	6	90	90	6	350.716	0.7751-0.7917	9292.9	699.417	2.6	D2EC27		HCD
M1_3_RB1_1_8834.d	TLSQLH	F2:13545	6	90	90	6	698.384	1.2270-1.2432	0	697.376	1	A0A8C4MSR3		HCD
M1_RB1_1_8657.d	DVLLKKL	F3:30722	7	90	90	7	414.781	0.7882-0.8049	0	827.548	-1.4	A0A8C4LCR7:A0A8C4LIJ3		HCD
M1_3_RB1_1_8834.d	RAQ(+.98)YKEVVPLNTRT	F2:37635	14	90	90	14	838.457	1.1042-1.1205	2516.8	1674.91	-4	P86272:C3W972	Deamidation (NQ)	HCD
M2-1_2_RB1_1_8837.d	NEDPLTKT	F4:11670	8	90	90	8	459.233	0.7868-0.8035	8974.6	916.45	2.1	A0A8C4KZN3:A0A8C4L2D4		HCD
M2-1_3_RB1_1_8839.d	EKYK	F5:7657	4	90	90	4	567.315	1.0565-1.0728	0	566.306	2.1			HCD
M1_RB1_1_8657.d	KHESTNLS(+79.97)QEKY	F3:12856	12	90	90	12	772.343	1.0066-1.0230	16800	1542.67	0.5	B7VGF9:C1L3G3	Phosphorylation (STY)	HCD
M1_RB1_1_8657.d	STPTLEA	F3:27009	7	90	90	7	718.361	1.2398-1.2560	0	717.355	-0.4			HCD
M1_2_RB1_1_8832.d	LPVLR	F1:28519	5	90	90	5	597.412	1.1789-1.1952	0	596.401	6.9			HCD
M2-1_RB1_1_8659.d	ESTNLS(+79.97)QEKY	F6:16320	10	90	90	10	639.768	0.9180-0.9345	152620	1277.52	3.5	B7VGF9:C1L3G3	Phosphorylation (STY)	HCD
M1_3_RB1_1_8834.d	EKVQKF	F2:8987	6	90	90	6	389.728	0.7369-0.7535	40287	777.438	4.4	D2EC27		HCD
M2-1_2_RB1_1_8837.d	SLSSKL	F4:16256	6	90	90	6	634.379	1.2290-1.2452	0	633.37	2.6	A0A8C4MSR3:A0A8C4N8C5:A0A8C4LSJ3:A0A8C4LU33		HCD
M1_3_RB1_1_8834.d	EPPGPL	F2:30002	6	90	90	6	609.327	1.1314-1.1477	0	608.317	5.3			HCD
M1_RB1_1_8657.d	EKVEKF	F3:10682	6	90	90	6	390.219	0.7397-0.7563	1657.4	778.423	1.9			HCD
M2-1_2_RB1_1_8837.d	DEPKSDLK	F4:4639	8	90	90	8	466.241	0.8125-0.8291	1145.6	930.466	2.1			HCD
M1_3_RB1_1_8834.d	LLPTQ	F2:22924	5	90	90	5	571.345	1.1314-1.1477	0	570.338	-0.1			HCD
M2-1_2_RB1_1_8837.d	ETLLKP	F4:20390	6	90	90	6	700.427	1.2695-1.2857	0	699.417	3.8			HCD
M1_RB1_1_8657.d	LPQEV	F3:25747	5	90	90	5	585.321	1.1606-1.1769	0	584.317	-4.8			HCD
M2-1_RB1_1_8659.d	EN(+.98)KYLK	F6:5492	6	90	90	6	398.217	0.7778-0.7945	624.91	794.417	2.1		Deamidation (NQ)	HCD
M2-1_2_RB1_1_8837.d	M(+42.01)EGAEEKK	F4:7998	8	90	90	8	482.229	0.8415-0.8581	1039	962.438	6.1		Acetylation (N-term)	HCD
M2-1_2_RB1_1_8837.d	A(+42.01)KLK	F4:4301	4	90	90	4	501.34	1.0626-1.0790	0	500.332	0.3		Acetylation (N-term)	HCD
M1_2_RB1_1_8832.d	HESTNLS(+79.97)QEKYK	F1:10701	12	90	90	12	515.232	0.8277-0.8443	167750	1542.67	2.5	B7VGF9:C1L3G3:A0A8C4MHP1:A0A8C4MKT7:A0A8C4MCS3	Phosphorylation (STY)	HCD
M1_2_RB1_1_8832.d	TLLPKR	F1:19156	6	90	90	6	364.247	0.7584-0.7751	997.98	726.475	4.8	D2EC27		HCD
M1_2_RB1_1_8832.d	PPPPPP	F1:24689	6	90	90	6	601.336	1.1157-1.1321	0	600.327	2.8	A0A8C4MTS8:A0A8C4LUM8:A0A8C4KXX4:A0A8C4M9E1:A0A8C4M3B4:A0A8C4LMY3:A0A8C4LNL1:A0A8C4LAX9:A0A8C4L5S0:A0A8C4LV13:A0A8C4LX24:A0A8C4LYB5:A0A8C4MZE5:A0A8C4LIZ6:A0A8C4LIA5:A0A8C4MVP1:A0A8C4MF50:A0A8C4MIB0:A0A8C4M7H9:A0A8C4MP75:A0A8C4L1M4:A0A8C4L0M4:A0A8C4MG23:A0A8C4MAY6:A0A8C4LUX7:A0A8C4NB56:A0A8C4MTY2:A0A8C4N2U9:A0A8C4LIL0:A0A8C4LI36:A0A8C4LI35:A0A8C4MLD5:A0A8C4MJU3:A0A8C4MMK2:A0A8C4PSM7:A0A8C4MLT9:A0A…		HCD
M1_2_RB1_1_8832.d	MPFLK	F1:38723	5	90	90	5	318.183	0.7237-0.7403	19654	634.351	1			HCD
M1_RB1_1_8657.d	PPPYK	F3:26207	5	90	90	5	601.334	1.1599-1.1762	0	600.327	-0.1			HCD
M2-1_3_RB1_1_8839.d	DEEKNF	F5:8572	6	90	90	6	391.173	0.7494-0.7660	1909.4	780.329	2.3			HCD
M1_3_RB1_1_8834.d	PPPPKY	F2:23105	6	90	90	6	698.386	1.2141-1.2303	0	697.38	-1.7			HCD
M1_2_RB1_1_8832.d	LPDKY	F1:16842	5	90	90	5	318.175	0.7056-0.7223	16329	634.333	5.3			HCD
M1_RB1_1_8657.d	EDEVKKL	F3:11866	7	90	90	7	430.741	0.7806-0.7972	109.73	859.465	2.5	A0A8C4KSW5:A0A8C4KST4:A0A8C4KUG4		HCD
M1_2_RB1_1_8832.d	PKPPRP	F1:4271	6	90	90	6	691.427	1.2175-1.2337	0	690.418	2.5	A0A8C4LJ14:A0A8C4LL04		HCD
M1_3_RB1_1_8834.d	LDNDVKRL	F2:25268	8	90	90	8	486.779	0.8284-0.8450	397.97	971.54	4.6			HCD
M1_2_RB1_1_8832.d	EM(+15.99)PFPK	F1:18812	6	90	90	6	382.687	0.7806-0.7972	8960.2	763.357	2.2		Oxidation (M)	HCD
M1_2_RB1_1_8832.d	K(+42.01)NEYKEVVPLNTEQ	F1:42780	14	90	90	14	866.945	1.0865-1.1028	2428	1731.87	4.4	P86272:C3W972	Acetylation (N-term)	HCD
M1_RB1_1_8657.d	EVAGLK	F3:28765	6	90	90	6	616.363	1.1830-1.1992	0	615.359	-5.9			HCD
M2-1_RB1_1_8659.d	ELLKEK	F6:7777	6	90	90	6	380.236	0.7889-0.8055	116560	758.454	3.9	P86272:C3W972:A0A8C4M6N0:A0A8C4PQ06:A0A8C4M9C8:A0A8C4M5V6:A0A8C4N1R3:A0A8C4N0Z5:A0A8C4N0L6:A0A8C4MRJ8		HCD
M1_2_RB1_1_8832.d	PPPPYK	F1:23107	6	90	90	6	698.388	1.1911-1.2073	0	697.38	0.6			HCD
M1_3_RB1_1_8834.d	DLKDRKV	F2:7540	7	90	90	7	437.264	0.8125-0.8291	1476.1	872.508	5.9	A0A8C4M047:A0A8C4LJH5		HCD
M2-1_3_RB1_1_8839.d	LPDKY	F5:13301	5	90	90	5	318.175	0.7111-0.7278	32942	634.333	3.9			HCD
M1_3_RB1_1_8834.d	HESTNLS(+79.97)QEKYK	F2:10666	12	90	90	12	515.232	0.8298-0.8463	158780	1542.67	1.3	B7VGF9:C1L3G3:A0A8C4MHP1:A0A8C4MKT7:A0A8C4MCS3	Phosphorylation (STY)	HCD
M1_2_RB1_1_8832.d	RN(+.98)PAEKVARV	F1:17426	10	90	90	10	570.827	0.9008-0.9173	244.32	1139.64	-0.7	A0A8C4KVD8:A0A8C4KU83:A0A8C4PT86	Deamidation (NQ)	HCD
M1_3_RB1_1_8834.d	AEEKKKKKL	F2:1317	9	90	90	9	551.355	0.8671-0.8836	1499.8	1100.69	2.7	A0A8C4LPN9:A0A8C4MD96:A0A8C4MLY4:A0A8C4MMG4:A0A8C4LYI3:A0A8C4M135:A0A8C4M712:A0A8C4MP75:A0A8C4L946:A0A8C4LA58:A0A8C4L2G1:A0A8C4L6W9:A0A8C4MGD3:A0A8C4LRW5:A0A8C4KUB0:A0A8C4PS52:A0A8C4L727:A0A8C4L5Z6:A0A8C4M1Y3:A0A8C4M2V3:A0A8C4M099:A0A8C4M5N7:A0A8C4LZT9:A0A8C4KQK5:A0A8C4PL28:A0A8C4LLN8:A0A8C4LJP8:A0A8C4MQT7:A0A8C4MPM2:A0A8C4MNE2:A0A8C4MD75:A0A8C4PRJ1:A0A8C4MEB5:A0A8C4MCX6:A0A8C4PRX7:A0A8C4PGF3:A0A…		HCD
M1_RB1_1_8657.d	EPPLVP	F3:39853	6	90	90	6	651.375	1.1802-1.1965	0	650.364	5.2			HCD
M2-1_3_RB1_1_8839.d	EKEELN	F5:3397	6	90	90	6	761.368	1.2580-1.2742	0	760.36	0.1	D2EC27:A0A8C4MZM0		HCD
M1_2_RB1_1_8832.d	DEEDKAFKQ	F1:10591	9	90	90	9	555.263	0.8650-0.8815	272.71	1108.5	6.4	A0A8C4MB72		HCD
M2-1_RB1_1_8659.d	DDSLLR	F6:18129	6	90	90	6	718.376	1.2587-1.2749	0	717.366	4			HCD
M1_RB1_1_8657.d	LPVPE	F3:32008	5	90	90	5	554.322	1.1219-1.1382	0	553.311	6.7			HCD
M2-1_3_RB1_1_8839.d	APPPPP	F5:12710	6	90	90	6	575.318	1.1096-1.1259	0	574.312	-1.8	A0A8C4MTS8:A0A8C4LUM8:A0A8C4LMY3:A0A8C4LNL1:A0A8C4MD96:A0A8C4MF50:A0A8C4MIB0:A0A8C4M7H9:A0A8C4MG23:A0A8C4LQX8:A0A8C4MWY8:A0A8C4N6K9:A0A8C4KZA5:A0A8C4LCG3		HCD
M2-1_RB1_1_8659.d	HESTNLS(+79.97)QEYK	F6:13155	11	90	90	11	708.296	0.9702-0.9867	309480	1414.58	0.8	C1L3G3	Phosphorylation (STY)	HCD
M2-1_RB1_1_8659.d	DAAAGRGPGGA	F6:3589	11	90	90	11	450.222	0.7626-0.7792	19705	898.426	4.3	A0A8C4LEB1		HCD
M2-1_2_RB1_1_8837.d	DELKKV	F4:5718	6	90	90	6	366.219	0.7223-0.7390	1059.9	730.423	1.6	A0A8C4MKB7		HCD
M1_2_RB1_1_8832.d	APRAPPPGGPGALAPLPR	F1:36358	18	90	90	18	564.664	0.8049-0.8215	8093.7	1690.96	3.9	A0A8C4N5V1:A0A8C4N1C2:A0A8C4M4P4:A0A8C4N8C5:A0A8C4MNZ6:A0A8C4MP05:A0A8C4N3Z1:A0A8C4LBJ9:A0A8C4LGH9		HCD
M1_3_RB1_1_8834.d	RPRGLPDKY	F2:14738	9	90	90	9	551.314	0.8739-0.8905	26722	1100.61	4.5	A0A8C4LEB1:A0A8C4M2T8		HCD
M1_3_RB1_1_8834.d	PLKLPK	F2:25158	6	90	90	6	348.245	0.7077-0.7244	0	694.474	3.3	A0A8C4MEG2		HCD
M1_3_RB1_1_8834.d	ASSNPGLHLL	F2:46149	10	90	90	10	504.777	0.8484-0.8650	892.7	1007.54	-0.1			HCD
M2-1_RB1_1_8659.d	KPVSLK	F6:4316	6	90	90	6	336.224	0.7118-0.7285	0	670.438	-6.2			HCD
M1_3_RB1_1_8834.d	HESTNLS(+79.97)QEKYK	F2:10616	12	90	90	12	515.232	0.8228-0.8394	158780	1542.67	1.3	B7VGF9:C1L3G3:A0A8C4MHP1:A0A8C4MKT7:A0A8C4MCS3	Phosphorylation (STY)	HCD
M1_RB1_1_8657.d	VTPVTKLE	F3:24400	8	90	90	8	443.765	0.7889-0.8055	1822.2	885.517	-2	A0A8C4LHK7		HCD
M1_RB1_1_8657.d	LDDKKL	F3:7257	6	90	90	6	731.43	1.2810-1.2971	0	730.423	0.7			HCD
M1_RB1_1_8657.d	LYEDSK	F3:6533	6	90	90	6	754.357	1.2830-1.2991	0	753.354	-6.3	A0A8C4LD23		HCD
M2-1_3_RB1_1_8839.d	PPPPPPP	F5:18219	7	90	90	7	698.389	1.1938-1.2100	0	697.38	2.3	A0A8C4MTS8:A0A8C4LUM8:A0A8C4KXX4:A0A8C4M9E1:A0A8C4M3B4:A0A8C4LMY3:A0A8C4LNL1:A0A8C4LAX9:A0A8C4L5S0:A0A8C4LV13:A0A8C4LX24:A0A8C4LYB5:A0A8C4MZE5:A0A8C4LIZ6:A0A8C4LIA5:A0A8C4MVP1:A0A8C4MF50:A0A8C4MIB0:A0A8C4M7H9:A0A8C4MP75:A0A8C4L1M4:A0A8C4L0M4:A0A8C4MG23:A0A8C4MAY6:A0A8C4LUX7:A0A8C4NB56:A0A8C4MTY2:A0A8C4N2U9:A0A8C4LIL0:A0A8C4LI36:A0A8C4LI35:A0A8C4MLD5:A0A8C4MJU3:A0A8C4MMK2:A0A8C4PSM7:A0A8C4MLT9:A0A…		HCD
M2-1_2_RB1_1_8837.d	SKSRKF	F4:303	6	90	90	6	376.725	0.7313-0.7480	0	751.434	2.2	A0A8C4LXL5		HCD
M1_RB1_1_8657.d	PPPPYK	F3:23031	6	90	90	6	698.389	1.2249-1.2411	0	697.38	2.9			HCD
M1_3_RB1_1_8834.d	FPADF	F2:45908	5	90	90	5	596.273	1.1321-1.1484	0	595.264	3.3			HCD
M1_2_RB1_1_8832.d	QRELLK	F1:10670	6	90	90	6	393.748	0.7480-0.7647	6255	785.476	5.9	P86272:C3W972:A0A8C4LY35:A0A8C4PLI8:A0A8C4LSS1:A0A8C4LN05:A0A8C4LJR9:A0A8C4LDV7		HCD
M1_3_RB1_1_8834.d	DPN(+.98)TSKLLPTQT	F2:37178	12	90	90	12	658.34	0.9304-0.9469	4148.6	1314.67	-1.5	A0A8C4LD23:A0A8C4ML69:A0A8C4PQX9:A0A8C4MA26:A0A8C4MDS9	Deamidation (NQ)	HCD
M1_3_RB1_1_8834.d	LGSTLAAKPV	F2:31690	10	90	90	10	478.795	0.8083-0.8249	11203	955.57	4.4	A0A8C4LJ03:A0A8C4MLD5:A0A8C4PSM7:A0A8C4MLT9:A0A8C4PSM5		HCD
M1_RB1_1_8657.d	APPVPRP	F3:14113	7	90	90	7	367.223	0.7882-0.8049	0	732.428	4			HCD
M2-1_RB1_1_8659.d	LEELKWK	F6:23301	7	90	90	7	473.275	0.8381-0.8546	96.403	944.533	2.8			HCD
M2-1_3_RB1_1_8839.d	APPPTP	F5:12617	6	90	90	6	579.313	1.0946-1.1110	0	578.306	-1.9	A0A8C4MZE5:A0A8C4MG23		HCD
M1_3_RB1_1_8834.d	LALLEEAR	F2:39740	8	90	90	8	457.769	0.8187-0.8353	124.04	913.523	0.4	A0A8C4MTS8:A0A8C4LUM8:A0A8C4LJS5:A0A8C4LLT0:A0A8C4LQQ5:A0A8C4KWD7		HCD
M1_2_RB1_1_8832.d	DEEKNFKA	F1:10495	8	90	90	8	490.741	0.8152-0.8318	1008.3	979.461	5.8			HCD
M2-1_3_RB1_1_8839.d	ELTKEEKLYLK	F5:20247	11	90	90	11	697.405	1.0011-1.0175	2359	1392.79	6.1	A0A8C4M7I4:A0A8C4LTE2:A0A8C4MQW4:A0A8C4PU43		HCD
M2-1_RB1_1_8659.d	DHTTNLS(+79.97)QEKYK	F6:8098	12	90	90	12	515.23	0.8353-0.8519	322550	1542.67	-2.5	B7VGF9:C1L3G3:A0A8C4MHP1:A0A8C4MKT7:A0A8C4MCS3	Phosphorylation (STY)	HCD
M2-1_2_RB1_1_8837.d	DPLLT	F4:25261	5	90	90	5	558.313	1.1178-1.1341	0	557.306	0.3			HCD
M1_RB1_1_8657.d	HCPPPVKQV	F3:30802	9	90	90	9	502.774	0.8291-0.8457	575.65	1003.53	5.3	A0A8C4M3B4:A0A8C4LRJ8:A0A8C4LH47:A0A8C4LJ06:A0A8C4KWG3:A0A8C4PFB2		HCD
M2-1_3_RB1_1_8839.d	TLEQLR	F5:16350	6	90	90	6	759.434	1.2708-1.2870	0	758.429	-2.2	P86272		HCD
M2-1_RB1_1_8659.d	Q(+.98)DLTKKL	F6:23827	7	90	90	7	423.751	0.7861-0.8028	234.23	845.486	2.6	A0A8C4MTS8:A0A8C4MGS3	Deamidation (NQ)	HCD
M1_3_RB1_1_8834.d	VPRKPPP	F2:5778	7	90	90	7	395.752	0.8125-0.8291	934.46	789.486	3.1			HCD
M2-1_RB1_1_8659.d	EPVKKV	F6:2583	6	90	90	6	350.224	0.7313-0.7480	8430.9	698.433	0.8	A0A8C4M5J3:A0A8C4M6R7:A0A8C4KZL8		HCD
M1_3_RB1_1_8834.d	QHATKGSHVKV	F2:3547	11	90	90	11	596.334	0.9215-0.9380	400.19	1190.65	0.5			HCD
M2-1_2_RB1_1_8837.d	DKDKEKKF	F4:563	8	90	90	8	519.286	0.8284-0.8450	477.46	1036.56	3	A0A8C4M1L5:A0A8C4PSE2:A0A8C4MCS9		HCD
M1_3_RB1_1_8834.d	DLKGPLEK	F2:13925	8	90	90	8	450.264	0.8194-0.8360	1871.1	898.512	2.1	A0A8C4L907		HCD
M1_3_RB1_1_8834.d	M(+42.01)M(+15.99)CVTLRH	F2:6239	8	90	90	8	524.74	0.8325-0.8491	0	1047.47	-0.3		Acetylation (N-term); Oxidation (M)	HCD
M1_2_RB1_1_8832.d	APARPPPGGPGALAPLPR	F1:36265	18	90	90	18	564.665	0.8546-0.8712	40235	1690.96	6	A0A8C4N5V1:A0A8C4N1C2:A0A8C4M4P4:A0A8C4N8C5:A0A8C4LUX7:A0A8C4MNZ6:A0A8C4MP05:A0A8C4M1X1:A0A8C4N3Z1:A0A8C4LF53:A0A8C4LF38:A0A8C4LBJ9:A0A8C4LGH9:A0A8C4PQY9		HCD
M1_3_RB1_1_8834.d	KPKKL	F2:1465	5	90	90	5	613.439	1.1952-1.2114	0	612.432	-0.1			HCD
M2-1_3_RB1_1_8839.d	DTSGDYRKL	F5:12074	9	90	90	9	527.764	0.8526-0.8691	0	1053.51	3.8	A0A8C4MQ97:A0A8C4MQ87		HCD
M1_2_RB1_1_8832.d	P(+42.01)AAPTRPVKKQ	F1:11392	11	90	90	11	617.866	0.9008-0.9173	8942.2	1233.72	-2		Acetylation (N-term)	HCD
M2-1_2_RB1_1_8837.d	ENNQRKPM	F4:1919	8	90	90	8	508.752	0.8291-0.8457	993.69	1015.49	2.6			HCD
M1_2_RB1_1_8832.d	VTPVTKLE	F1:24583	8	90	90	8	443.765	0.7813-0.7979	1615.7	885.517	-1.1	A0A8C4LHK7		HCD
M2-1_RB1_1_8659.d	LN(+.98)DKLKL	F6:16308	7	90	90	7	422.762	0.8104-0.8270	0	843.506	3.6	A0A8C4MVP1	Deamidation (NQ)	HCD
M1_2_RB1_1_8832.d	WTKELVSSKVSG	F1:20612	12	90	90	12	660.86	0.9792-0.9956	411.75	1319.71	-2.9	A0A8C4LD25:A0A8C4MG23:A0A8C4PSY6:A0A8C4MMW0:A0A8C4M0T1		HCD
M1_RB1_1_8657.d	KPVSLRK	F3:3270	7	90	90	7	414.276	0.7972-0.8138	477.38	826.539	-1.8	A0A8C4MDU2		HCD
M1_2_RB1_1_8832.d	HESTNLS(+79.97)QEKY	F1:16906	11	90	90	11	708.3	0.9668-0.9833	57416	1414.58	5.8	B7VGF9:C1L3G3	Phosphorylation (STY)	HCD
M2-1_2_RB1_1_8837.d	ELEE	F4:6774	4	90	90	4	519.228	1.0380-1.0544	0	518.222	-4			HCD
M1_2_RB1_1_8832.d	EKVKLTKV	F1:12021	8	90	90	8	472.812	0.8104-0.8270	423.4	943.607	3.9	A0A8C4MA64		HCD
M1_3_RB1_1_8834.d	QLLPVLR	F2:45744	7	90	90	7	419.782	0.7986-0.8152	213.77	837.544	5.9	B7VGF9		HCD
M1_RB1_1_8657.d	QRELLK	F3:10570	6	90	90	6	393.747	0.7563-0.7730	8235.4	785.476	4.9	P86272:C3W972:A0A8C4LY35:A0A8C4PLI8:A0A8C4LSS1:A0A8C4LN05:A0A8C4LJR9:A0A8C4LDV7		HCD
M2-1_2_RB1_1_8837.d	LN(+.98)VKKL	F4:8002	6	90	90	6	358.24	0.7244-0.7410	162.34	714.464	3.3		Deamidation (NQ)	HCD
M1_RB1_1_8657.d	LNDEELR	F3:15665	7	90	90	7	444.726	0.8118-0.8284	222.97	887.435	2.4	A0A8C4MBA7		HCD
M1_3_RB1_1_8834.d	VGLMYPQ	F2:41680	7	90	90	7	807.406	1.2796-1.2958	0	806.4	-1.5			HCD
M2-1_3_RB1_1_8839.d	N(+42.01)PPKAPSKKE	F5:5324	10	90	90	10	569.318	0.8595-0.8760	1602.6	1136.62	2.9	A0A8C4M2F8:A0A8C4PP55:A0A8C4M526:A0A8C4PSX3	Acetylation (N-term)	HCD
M2-1_2_RB1_1_8837.d	ELLKEK	F4:7538	6	90	90	6	380.235	0.7647-0.7813	119980	758.454	2.9	P86272:C3W972:A0A8C4M6N0:A0A8C4PQ06:A0A8C4M9C8:A0A8C4M5V6:A0A8C4N1R3:A0A8C4N0Z5:A0A8C4N0L6:A0A8C4MRJ8		HCD
M1_RB1_1_8657.d	RPRGLPDKY	F3:14736	9	90	90	9	551.313	0.8774-0.8939	22981	1100.61	2.4	A0A8C4LEB1:A0A8C4M2T8		HCD
M2-1_3_RB1_1_8839.d	HESTNLS(+79.97)QEKY	F5:13353	11	90	90	11	708.298	0.9771-0.9935	297590	1414.58	3.5	B7VGF9:C1L3G3	Phosphorylation (STY)	HCD
M1_2_RB1_1_8832.d	APPVPP	F1:24178	6	90	90	6	577.336	1.1123-1.1287	0	576.327	2.7			HCD
M1_3_RB1_1_8834.d	LETSRV	F2:24795	6	90	90	6	352.7	0.7438-0.7605	1257.7	703.386	-0.8			HCD
M1_2_RB1_1_8832.d	LTLVHVLV	F1:38546	8	90	90	8	447.295	0.7882-0.8049	475.86	892.575	1.5			HCD
M2-1_2_RB1_1_8837.d	HLKQLN	F4:4279	6	90	90	6	376.726	0.7965-0.8132	323.9	751.434	4.6	B7VGF9		HCD
M2-1_RB1_1_8659.d	PPPPPPP	F6:17934	7	90	90	7	698.391	1.2283-1.2445	0	697.38	5.8	A0A8C4MTS8:A0A8C4LUM8:A0A8C4KXX4:A0A8C4M9E1:A0A8C4M3B4:A0A8C4LMY3:A0A8C4LNL1:A0A8C4LAX9:A0A8C4L5S0:A0A8C4LV13:A0A8C4LX24:A0A8C4LYB5:A0A8C4MZE5:A0A8C4LIZ6:A0A8C4LIA5:A0A8C4MVP1:A0A8C4MF50:A0A8C4MIB0:A0A8C4M7H9:A0A8C4MP75:A0A8C4L1M4:A0A8C4L0M4:A0A8C4MG23:A0A8C4MAY6:A0A8C4LUX7:A0A8C4NB56:A0A8C4MTY2:A0A8C4N2U9:A0A8C4LIL0:A0A8C4LI36:A0A8C4LI35:A0A8C4MLD5:A0A8C4MJU3:A0A8C4MMK2:A0A8C4PSM7:A0A8C4MLT9:A0A…		HCD
M1_2_RB1_1_8832.d	DGENLRLP	F1:42996	8	90	90	8	457.241	0.8069-0.8235	1338.3	912.466	0.8	D2EC27		HCD
M1_2_RB1_1_8832.d	EANYLGADKYF	F1:44852	11	90	90	11	645.808	0.9332-0.9496	2054.9	1289.59	6.4	A0A8C4LEB1:A0A8C4MGQ5		HCD
M1_3_RB1_1_8834.d	VSPLPDLFPADFK	F2:57816	13	90	90	13	723.391	1.0216-1.0380	5270.2	1444.76	5	A0A8C4L6A6		HCD
M1_2_RB1_1_8832.d	VDLKVK	F1:13453	6	90	90	6	351.233	0.7111-0.7278	515.93	700.448	5.4	A0A8C4PQY9		HCD
M2-1_RB1_1_8659.d	PPPPPP	F6:16787	6	90	90	6	601.334	1.1348-1.1511	0	600.327	-0.9	A0A8C4MTS8:A0A8C4LUM8:A0A8C4KXX4:A0A8C4M9E1:A0A8C4M3B4:A0A8C4LMY3:A0A8C4LNL1:A0A8C4LAX9:A0A8C4L5S0:A0A8C4LV13:A0A8C4LX24:A0A8C4LYB5:A0A8C4MZE5:A0A8C4LIZ6:A0A8C4LIA5:A0A8C4MVP1:A0A8C4MF50:A0A8C4MIB0:A0A8C4M7H9:A0A8C4MP75:A0A8C4L1M4:A0A8C4L0M4:A0A8C4MG23:A0A8C4MAY6:A0A8C4LUX7:A0A8C4NB56:A0A8C4MTY2:A0A8C4N2U9:A0A8C4LIL0:A0A8C4LI36:A0A8C4LI35:A0A8C4MLD5:A0A8C4MJU3:A0A8C4MMK2:A0A8C4PSM7:A0A8C4MLT9:A0A…		HCD
M1_3_RB1_1_8834.d	DQN(+.98)PLTKT	F2:14740	8	90	90	8	459.235	0.7889-0.8055	1932.7	916.45	5.5		Deamidation (NQ)	HCD
M2-1_RB1_1_8659.d	EDDLAKV	F6:17154	7	90	90	7	789.404	1.2762-1.2924	0	788.391	7	A0A8C4LJ03:A0A8C4LZ41:A0A8C4LYI1:A0A8C4M487:A0A8C4M0J3		HCD
M1_2_RB1_1_8832.d	VEKGPKV	F1:17833	7	90	90	7	378.734	0.7195-0.7362	0	755.454	-2.1			HCD
M2-1_3_RB1_1_8839.d	DELKKV	F5:5796	6	90	90	6	366.22	0.7216-0.7383	2013.3	730.423	5.2	A0A8C4MKB7		HCD
M1_3_RB1_1_8834.d	HQHQTTMDPQSKHVLL	F2:23993	16	90	90	16	633.992	0.9490-0.9654	3021.7	1898.94	6.4	B7VGF9:A0A8C4MGZ9		HCD
M2-1_RB1_1_8659.d	EKVEKF	F6:8016	6	90	90	6	390.219	0.7383-0.7549	524.58	778.423	2.3			HCD
M1_3_RB1_1_8834.d	VPYPCKAPTPVQA	F2:27455	13	90	90	13	685.865	0.9846-1.0011	20626	1369.71	6	A0A8C4L1V5:A0A8C4L4B8		HCD
M1_3_RB1_1_8834.d	KFYALKEKQKDEHK	F2:10275	14	90	90	14	597.998	0.8588-0.8753	7872.6	1790.97	1.8	P86272:C3W972:A0A8C4MB72:A0A8C4M6N0:A0A8C4PQ06:A0A8C4M9C8:A0A8C4M5V6:A0A8C4N115:A0A8C4MZ04:A0A8C4MBW3:A0A8C4MFI5:A0A8C4MN77:A0A8C4MLN5:A0A8C4M686:A0A8C4MBZ9:A0A8C4MBY1:A0A8C4L602:A0A8C4L3K5		HCD
M2-1_RB1_1_8659.d	LPDKY	F6:13300	5	90	90	5	635.341	1.1375-1.1538	0	634.333	1.9			HCD
M2-1_2_RB1_1_8837.d	SKSRKF	F4:374	6	90	90	6	376.725	0.7237-0.7403	0	751.434	2.2	A0A8C4LXL5		HCD
M1_3_RB1_1_8834.d	CLN(+.98)SVNLSQEKF	F2:35733	12	90	90	12	691.834	0.9696-0.9860	501.1	1381.65	-1.6	B7VGF9:C1L3G3:A0A8C4L4E9:A0A8C4PHP3:A0A8C4MMU5	Deamidation (NQ)	HCD
M1_3_RB1_1_8834.d	M(+42.01)(+15.99)NHTFQTSVSGVH	F2:28888	13	90	90	13	751.842	1.0346-1.0510	1064.1	1501.66	4.5		Acetylation (N-term); Oxidation (M)	HCD
M1_RB1_1_8657.d	VKRM(+15.99)LPRRV	F3:13968	9	90	90	9	390.916	0.7258-0.7424	0	1169.72	6.7		Oxidation (M)	HCD
M1_RB1_1_8657.d	FPADF	F3:45436	5	90	90	5	596.274	1.1443-1.1606	0	595.264	5.1			HCD
M1_RB1_1_8657.d	AHATKGSHVKV	F3:3163	11	90	90	11	567.822	0.9139-0.9304	87.934	1133.63	-1.6			HCD
M1_2_RB1_1_8832.d	DNKQLLR	F1:10736	7	90	90	7	443.761	0.7785-0.7952	159.96	885.503	5.3			HCD
M1_3_RB1_1_8834.d	LPVLEKN	F2:27158	7	90	90	7	406.749	0.7695-0.7861	2825.5	811.48	4.3			HCD
M1_2_RB1_1_8832.d	FPADF	F1:46251	5	90	90	5	596.275	1.1314-1.1477	0	595.264	6.1			HCD
M1_2_RB1_1_8832.d	DAVSLSMLKPDPSQK	F1:37678	15	90	90	15	808.424	1.0803-1.0967	5660.8	1614.83	3.6	A0A8C4LXL5:A0A8C4LJ03:A0A8C4MLW6		HCD
M1_RB1_1_8657.d	KVVNLN	F3:15860	6	90	90	6	686.418	1.2405-1.2567	0	685.412	-2	A0A8C4M4E5		HCD
M1_RB1_1_8657.d	LLEELKWK	F3:42580	8	90	90	8	529.817	0.8974-0.9139	142.03	1057.62	1.9	A0A8C4PJR0:A0A8C4KUH1:A0A8C4KVX9		HCD
M2-1_2_RB1_1_8837.d	FPADF	F4:29228	5	90	90	5	596.274	1.1178-1.1341	0	595.264	4.1			HCD
M1_2_RB1_1_8832.d	TLEQLR	F1:20547	6	90	90	6	380.223	0.7612-0.7778	3257.6	758.429	3.4	P86272		HCD
M2-1_2_RB1_1_8837.d	HESTNLS(+79.97)QEKYK	F4:8144	12	90	90	12	772.344	0.9990-1.0154	387980	1542.67	1.4	B7VGF9:C1L3G3:A0A8C4MHP1:A0A8C4MKT7:A0A8C4MCS3	Phosphorylation (STY)	HCD
M1_3_RB1_1_8834.d	TELLPKRK	F2:12150	8	90	90	8	328.879	0.7223-0.7390	26640	983.613	3.7	D2EC27		HCD
M1_2_RB1_1_8832.d	Q(+.98)LLKEK	F1:10355	6	90	90	6	380.236	0.7619-0.7785	48961	758.454	6.2	A0A8C4PPH6:A0A8C4LAY0:A0A8C4MCY2:A0A8C4M6X1	Deamidation (NQ)	HCD
M2-1_RB1_1_8659.d	DKLFRS	F6:12062	6	90	90	6	383.215	0.7480-0.7647	3560.2	764.418	-2.3			HCD
M1_2_RB1_1_8832.d	DKLEE	F1:22867	5	90	90	5	633.312	1.1809-1.1972	0	632.302	4.4			HCD
M1_3_RB1_1_8834.d	M(+42.01)(+15.99)NHTF	F2:20556	5	90	90	5	707.283	1.2303-1.2466	0	706.274	2		Acetylation (N-term); Oxidation (M)	HCD
M2-1_3_RB1_1_8839.d	EDKPKL	F5:13006	6	90	90	6	365.213	0.7584-0.7751	137.67	728.407	6.9			HCD
M2-1_RB1_1_8659.d	QRELLK	F6:8053	6	90	90	6	393.746	0.7577-0.7744	11679	785.476	1.6	P86272:C3W972:A0A8C4LY35:A0A8C4PLI8:A0A8C4LSS1:A0A8C4LN05:A0A8C4LJR9:A0A8C4LDV7		HCD
M2-1_RB1_1_8659.d	ELLKEK	F6:7667	6	90	90	6	380.236	0.7737-0.7903	116560	758.454	3.9	P86272:C3W972:A0A8C4M6N0:A0A8C4PQ06:A0A8C4M9C8:A0A8C4M5V6:A0A8C4N1R3:A0A8C4N0Z5:A0A8C4N0L6:A0A8C4MRJ8		HCD
M2-1_2_RB1_1_8837.d	S(+79.97)QEKYK	F4:317	6	90	90	6	431.689	0.7529-0.7695	0	861.363	-0.4	C1L3G3:A0A8C4MHP1:A0A8C4MKT7:A0A8C4MCS3	Phosphorylation (STY)	HCD
M1_3_RB1_1_8834.d	HSDAVSLVCLKPDPSQK	F2:39506	17	90	90	17	608.651	0.9256-0.9421	88768	1822.92	2.9	A0A8C4LXL5:A0A8C4MLW6		HCD
M1_2_RB1_1_8832.d	HTHRAYVPPGSTR	F1:6658	13	90	90	13	493.594	0.7737-0.7903	6624.7	1477.75	5.2	A0A8C4MN72		HCD
M1_RB1_1_8657.d	P(+42.01)PAVPYPQRDTPVQA	F3:46027	15	90	90	15	839.437	1.0803-1.0967	37832	1676.85	4	D2EC27	Acetylation (N-term)	HCD
M1_3_RB1_1_8834.d	LPEKEP	F2:11899	6	90	90	6	356.699	0.7501-0.7667	8494.8	711.38	4.3			HCD
M1_3_RB1_1_8834.d	APPPRPP	F2:13483	7	90	90	7	366.216	0.7056-0.7223	0	730.413	5.6			HCD
M1_2_RB1_1_8832.d	DLGKPLE	F1:22666	7	90	90	7	771.421	1.2789-1.2951	0	770.417	-5	A0A8C4MES9		HCD
M1_3_RB1_1_8834.d	QDKYFHARGNYDAAQR	F2:18637	16	90	90	16	485.736	0.8242-0.8408	5505.4	1938.91	4.3	A0A8C4LEB1		HCD
M1_2_RB1_1_8832.d	TLLPK	F1:23175	5	90	90	5	571.384	1.1708-1.1870	0	570.374	4			HCD
M2-1_2_RB1_1_8837.d	DERFF	F4:27026	5	90	90	5	357.166	0.7362-0.7529	741.61	712.318	0.1			HCD
M1_2_RB1_1_8832.d	LLPTET	F1:28180	6	90	90	6	673.379	1.2026-1.2188	0	672.369	3.8			HCD
M1_2_RB1_1_8832.d	NTEKRLP	F1:8195	7	90	90	7	429.248	0.7882-0.8049	1223.2	856.477	6.9			HCD
M2-1_3_RB1_1_8839.d	HQ(+.98)GQQQREVEHQD	F5:1618	13	90	90	13	540.574	0.8346-0.8512	179910	1618.71	-4.6	D2EC27	Deamidation (NQ)	HCD
M1_2_RB1_1_8832.d	FRTHF	F1:14767	5	90	90	5	354.186	0.7466-0.7633	2516	706.355	2.4			HCD
M2-1_2_RB1_1_8837.d	DDERKL	F4:4066	6	90	90	6	388.202	0.7431-0.7598	11269	774.387	2.5	A0A8C4MKZ0		HCD
M1_RB1_1_8657.d	P(+42.01)T(+79.97)CVTLRH	F3:6119	8	90	90	8	524.739	0.8532-0.8698	439.99	1047.46	6.6		Acetylation (N-term); Phosphorylation (STY)	HCD
M1_RB1_1_8657.d	PRATEQK	F3:26230	7	90	90	7	415.232	0.7716-0.7882	0	828.445	4.6			HCD
M1_2_RB1_1_8832.d	MADQ(+.98)AGSKADPED	F1:10829	13	90	90	13	668.275	0.9228-0.9393	3132.9	1334.53	4.8		Deamidation (NQ)	HCD
M2-1_3_RB1_1_8839.d	LPEKEP	F5:9332	6	90	90	6	356.7	0.7049-0.7216	303.83	711.38	6.7			HCD
M1_2_RB1_1_8832.d	LPLLEKL	F1:51129	7	90	90	7	413.277	0.7751-0.7917	1061.8	824.537	3.7	A0A8C4MGS3:A0A8C4M5C7:A0A8C4N2B5:A0A8C4N256:A0A8C4KX67		HCD
M1_RB1_1_8657.d	KPDAAKRKV	F3:5275	9	90	90	9	506.817	0.8539-0.8705	0	1011.62	-0.1	A0A8C4MAW8:A0A8C4MYG1:A0A8C4N0D2		HCD
M1_3_RB1_1_8834.d	DEDYKL	F2:23261	6	90	90	6	391.683	0.7570-0.7737	1782.5	781.349	1.9			HCD
M1_2_RB1_1_8832.d	PPLKLKP	F1:24883	7	90	90	7	396.771	0.7424-0.7591	2983.8	791.527	0.4			HCD
M1_2_RB1_1_8832.d	NHFRPR	F1:3729	6	90	90	6	413.727	0.7612-0.7778	1559.4	825.436	3.6			HCD
M1_2_RB1_1_8832.d	PPPPYK	F1:21167	6	90	90	6	698.386	1.2486-1.2648	0	697.38	-1.4			HCD
M1_3_RB1_1_8834.d	DLGGKV	F2:15001	6	90	90	6	588.337	1.1531-1.1694	0	587.328	3.8	P0DUB1:A0A8C4L7D7:A0A8C4PHR9		HCD
M2-1_3_RB1_1_8839.d	DERFF	F5:27151	5	90	90	5	357.167	0.7376-0.7542	775.7	712.318	2.2			HCD
M1_RB1_1_8657.d	LVKKPK	F3:3167	6	90	90	6	356.757	0.7473-0.7640	258.27	711.501	-0.7			HCD
M2-1_3_RB1_1_8839.d	FLASVSTVLTSK	F5:30428	12	90	90	12	626.862	0.9462-0.9627	1044.5	1251.71	1.1	A0A8C4LIZ8		HCD
M2-1_3_RB1_1_8839.d	TPTLEA	F5:20338	6	90	90	6	631.332	1.1477-1.1640	0	630.322	3.6			HCD
M1_RB1_1_8657.d	LVHQHQTTMDPQSHK	F3:6970	15	90	90	15	596.297	0.8691-0.8857	1727.8	1785.86	5.4	B7VGF9		HCD
M1_2_RB1_1_8832.d	LVMRSR	F1:11637	6	90	90	6	381.228	0.7452-0.7619	300.32	760.438	4			HCD
M2-1_2_RB1_1_8837.d	LPPPPPPP	F4:25372	8	90	90	8	406.237	0.7757-0.7924	279.38	810.464	-5.8	A0A8C4MTS8:A0A8C4LUM8:A0A8C4KXX4:A0A8C4M9E1:A0A8C4M3B4:A0A8C4LMY3:A0A8C4LNL1:A0A8C4LAX9:A0A8C4L5S0:A0A8C4LV13:A0A8C4M4P4:A0A8C4LX24:A0A8C4LYB5:A0A8C4MZE5:A0A8C4LIZ6:A0A8C4LIA5:A0A8C4MVP1:A0A8C4MF50:A0A8C4MIB0:A0A8C4M7H9:A0A8C4MP75:A0A8C4L1M4:A0A8C4L0M4:A0A8C4MG23:A0A8C4MAY6:A0A8C4M0R7:A0A8C4LUX7:A0A8C4NB56:A0A8C4MTY2:A0A8C4N2U9:A0A8C4LIL0:A0A8C4LI36:A0A8C4LRB2:A0A8C4LSK6:A0A8C4LI35:A0A8C4MLD5:A0A…		HCD
M1_RB1_1_8657.d	EEKVQKF	F3:11336	7	90	90	7	454.248	0.7924-0.8090	2105.6	906.481	0.6	D2EC27:A0A8C4KT44:A0A8C4MNE2:A0A8C4MD75:A0A8C4PRJ1:A0A8C4MEB5:A0A8C4MCX6:A0A8C4PRX7		HCD
M2-1_2_RB1_1_8837.d	PPPPYK	F4:22869	6	90	90	6	698.384	1.2526-1.2688	0	697.38	-4.2			HCD
M1_2_RB1_1_8832.d	SQGAGHLQTR	F1:5027	10	90	90	10	527.775	0.8408-0.8574	1180	1053.53	4.4	A0A8C4MF50:A0A8C4MIB0:A0A8C4M7H9		HCD
M1_3_RB1_1_8834.d	PPLKLAGKPP	F2:29746	10	90	90	10	509.329	0.8532-0.8698	6644.2	1016.64	5	A0A8C4L4V2		HCD
M1_3_RB1_1_8834.d	ELTRTEKLYL	F2:37377	10	90	90	10	633.358	0.9778-0.9942	4232.3	1264.7	-1.2			HCD
M2-1_RB1_1_8659.d	HPELLQ	F6:15856	6	90	90	6	736.399	1.2708-1.2870	0	735.391	0.3	P86272:C3W972:A0A8C4PJH0		HCD
M1_RB1_1_8657.d	TVKVLLK	F3:25475	7	90	90	7	400.784	0.7737-0.7903	0	799.553	0	A0A8C4MDL7		HCD
M1_3_RB1_1_8834.d	TSNPK(+42.01)HLLL	F2:54014	9	90	90	9	532.81	0.8588-0.8753	0	1063.6	2		Acetylation (K)	HCD
M2-1_RB1_1_8659.d	KQAHMYK	F6:7583	7	90	90	7	453.238	0.8104-0.8270	707.21	904.459	2.9			HCD
M1_RB1_1_8657.d	VGDLRHNKDRKV	F3:7526	12	90	90	12	479.608	0.7647-0.7813	1139.8	1435.8	1.6			HCD
M2-1_2_RB1_1_8837.d	ETLLKP	F4:20626	6	90	90	6	350.718	0.7730-0.7896	75501	699.417	5.8			HCD
M1_RB1_1_8657.d	GPPLK	F3:7530	5	90	90	5	511.324	1.0640-1.0803	0	510.317	-0.1			HCD
M2-1_RB1_1_8659.d	DTDTLHSKL	F6:16563	9	90	90	9	515.264	0.8546-0.8712	225.32	1028.51	-0.7	A0A8C4LD23		HCD
M1_RB1_1_8657.d	PPPPP	F3:12399	5	90	90	5	504.285	1.0360-1.0524	0	503.274	5.9			HCD
M1_3_RB1_1_8834.d	PLVPVHNPVLN	F2:44004	11	90	90	11	599.854	0.9139-0.9304	1746.6	1197.69	4.6	D2EC27		HCD
M2-1_3_RB1_1_8839.d	LDERL	F5:19969	5	90	90	5	645.359	1.1945-1.2107	0	644.349	4			HCD
M2-1_3_RB1_1_8839.d	DNKQLLR	F5:8153	7	90	90	7	443.76	0.7764-0.7931	263.9	885.503	3.1			HCD
M2-1_2_RB1_1_8837.d	DQASHL	F4:6222	6	90	90	6	670.314	1.2175-1.2337	0	669.308	-1.7	A0A8C4MSR3		HCD
M2-1_3_RB1_1_8839.d	WPEL	F5:30967	4	90	90	4	544.275	1.0742-1.0905	0	543.269	-2.3			HCD
M2-1_RB1_1_8659.d	DVPRKL	F6:12170	6	90	90	6	364.227	0.7271-0.7438	1974.1	726.439	1.4	A0A8C4LMV6		HCD
M1_2_RB1_1_8832.d	SKSRKF	F1:2042	6	90	90	6	376.726	0.7410-0.7577	30483	751.434	3.4	A0A8C4LXL5		HCD
M1_3_RB1_1_8834.d	DSESAPLRVYLEK	F2:39100	13	90	90	13	753.896	1.0394-1.0558	2019.8	1505.77	3.3	P13613:D6QX32:D6QX31		HCD
M2-1_3_RB1_1_8839.d	M(+42.01)EAHE	F5:11325	5	90	90	5	658.251	1.1755-1.1918	0	657.243	1.8		Acetylation (N-term)	HCD
M2-1_RB1_1_8659.d	DKYFH	F6:8466	5	90	90	5	355.168	0.7494-0.7660	4720.7	708.323	-1			HCD
M1_3_RB1_1_8834.d	SPAKPKAV	F2:6015	8	90	90	8	399.248	0.8007-0.8173	3497.1	796.481	1.2			HCD
M2-1_2_RB1_1_8837.d	TPTLEA	F4:20191	6	90	90	6	631.329	1.1463-1.1626	0	630.322	-0.8			HCD
M2-1_3_RB1_1_8839.d	ELLKEK	F5:7570	6	90	90	6	380.236	0.7647-0.7813	127560	758.454	4.7	P86272:C3W972:A0A8C4M6N0:A0A8C4PQ06:A0A8C4M9C8:A0A8C4M5V6:A0A8C4N1R3:A0A8C4N0Z5:A0A8C4N0L6:A0A8C4MRJ8		HCD
M1_3_RB1_1_8834.d	DLN(+.98)KTKVK	F2:5160	8	90	90	8	473.784	0.8069-0.8235	162.67	945.549	3.4		Deamidation (NQ)	HCD
M1_2_RB1_1_8832.d	DPATQPLVPVHNPVLN	F1:48358	16	90	90	16	855.968	1.1144-1.1307	46222	1709.91	7	D2EC27		HCD
M2-1_RB1_1_8659.d	FNTLDE	F6:26473	6	90	90	6	738.332	1.2614-1.2776	0	737.323	2.2			HCD
M2-1_RB1_1_8659.d	EVEKKV	F6:1780	6	90	90	6	366.219	0.7292-0.7459	456.64	730.423	0.9			HCD
M2-1_2_RB1_1_8837.d	SPLPDL	F4:29669	6	90	90	6	641.354	1.1613-1.1775	0	640.343	5.7	A0A8C4L6A6		HCD
M2-1_RB1_1_8659.d	EN(+.98)EDKYL	F6:19522	7	90	90	7	456.205	0.7924-0.8090	79881	910.392	3.1		Deamidation (NQ)	HCD
M1_3_RB1_1_8834.d	KHESTNLNTEK	F2:3506	11	90	90	11	650.828	0.9387-0.9551	264.58	1299.64	-0.7	A0A8C4N115:A0A8C4MZ04		HCD
M1_3_RB1_1_8834.d	FPADKF	F2:32183	6	90	90	6	362.688	0.7251-0.7417	3660.1	723.359	3.2			HCD
M1_2_RB1_1_8832.d	QLEKEHH	F1:1693	7	90	90	7	460.736	0.8166-0.8332	0	919.451	6.3			HCD
M1_RB1_1_8657.d	FPADF	F3:45267	5	90	90	5	596.273	1.1416-1.1579	0	595.264	3.3			HCD
M2-1_RB1_1_8659.d	DEDTKKLL	F6:16296	8	90	90	8	481.264	0.8097-0.8263	498.35	960.513	1.6	A0A8C4LF86		HCD
M1_2_RB1_1_8832.d	M(+42.01)LRLK	F1:54141	5	90	90	5	702.428	1.2574-1.2735	0	701.426	-6.6		Acetylation (N-term)	HCD
M1_RB1_1_8657.d	GLDRLEE	F3:21564	7	90	90	7	416.212	0.7771-0.7938	561.6	830.413	-4.3	A0A8C4MSR3:A0A8C4M7I4		HCD
M1_3_RB1_1_8834.d	PATQPLVPVHNPVLN	F2:45755	15	90	90	15	798.454	1.0530-1.0694	20953	1594.88	6.9	D2EC27		HCD
M2-1_2_RB1_1_8837.d	N(+.98)HTTNLS(+79.97)EEKKY	F4:9474	12	90	90	12	515.561	0.8125-0.8291	7196.6	1543.66	4	A0A8C4MTZ7:A0A8C4LTE2:A0A8C4MSP9:A0A8C4PU63:A0A8C4MU62	Deamidation (NQ); Phosphorylation (STY)	HCD
M2-1_3_RB1_1_8839.d	DAAAGRGPGGA	F5:3572	11	90	90	11	450.223	0.7549-0.7716	19235	898.426	6.1	A0A8C4LEB1		HCD
M2-1_RB1_1_8659.d	TNLS(+79.97)QEYK	F6:15244	8	90	90	8	531.73	0.8353-0.8519	13433	1061.44	1.9	C1L3G3	Phosphorylation (STY)	HCD
M1_2_RB1_1_8832.d	DDPSPLS	F1:23668	7	90	90	7	730.327	1.2310-1.2472	0	729.318	2.2			HCD
M2-1_3_RB1_1_8839.d	SKSRKF	F5:219	6	90	90	6	376.725	0.7334-0.7501	0	751.434	2.3	A0A8C4LXL5		HCD
M1_3_RB1_1_8834.d	VERHNKDRKV	F2:3108	10	90	90	10	427.578	0.7077-0.7244	2653.1	1279.71	0.9			HCD
M1_2_RB1_1_8832.d	HNPVLN	F1:12893	6	90	90	6	693.369	1.1945-1.2107	0	692.361	2.4			HCD
M1_RB1_1_8657.d	DELKKV	F3:8257	6	90	90	6	366.22	0.7306-0.7473	358.4	730.423	3.7	A0A8C4MKB7		HCD
M1_2_RB1_1_8832.d	LLPVRL	F1:40373	6	90	90	6	355.751	0.7452-0.7619	0	709.485	2.5			HCD
M1_3_RB1_1_8834.d	ETLLPRK	F2:18418	7	90	90	7	428.767	0.7757-0.7924	33027	855.518	1			HCD
M1_2_RB1_1_8832.d	AAPELQNQHVSKATTDKLH	F1:16080	19	90	90	19	696.704	0.8988-0.9153	13640	2087.08	6.7			HCD
M1_2_RB1_1_8832.d	DRKFFGDSGHGEADSR	F1:16778	16	90	90	16	594.275	0.8152-0.8318	3810.6	1779.79	6.8	A0A8C4LEB1:A0A8C4LUX7		HCD
M2-1_RB1_1_8659.d	N(+.98)HTTNLS(+79.97)QEKYK	F6:8370	12	90	90	12	515.233	0.8035-0.8201	0	1542.67	3.5	B7VGF9:C1L3G3:A0A8C4MHP1:A0A8C4MKT7:A0A8C4MCS3	Deamidation (NQ); Phosphorylation (STY)	HCD
M1_RB1_1_8657.d	SPAEFK	F3:11568	6	90	90	6	678.349	1.2114-1.2276	0	677.338	4.7	P13613		HCD
M2-1_RB1_1_8659.d	EVVPLNTEK	F6:20054	9	90	90	9	514.787	0.8733-0.8898	2814.9	1027.55	4.8	P86272:C3W972		HCD
M2-1_3_RB1_1_8839.d	DKLFRS	F5:12062	6	90	90	6	383.218	0.7417-0.7584	3691.2	764.418	3.7			HCD
M2-1_3_RB1_1_8839.d	ELLRL	F5:21396	5	90	90	5	643.417	1.2175-1.2337	0	642.406	5.1			HCD
M2-1_RB1_1_8659.d	FPADF	F6:29225	5	90	90	5	596.271	1.1280-1.1443	0	595.264	-1.3			HCD
M1_2_RB1_1_8832.d	PLVPVHNPVLN	F1:44287	11	90	90	11	599.854	0.9146-0.9311	2120	1197.69	5.7	D2EC27		HCD
M1_2_RB1_1_8832.d	AAPRPPPGGPGASAPLP	F1:33906	17	89	89	17	755.417	1.0489-1.0653	15630	1508.81	6	A0A8C4N5V1:A0A8C4N601:A0A8C4PV57:A0A8C4N1C2:A0A8C4PJ30:A0A8C4M4P4:A0A8C4N8C5:A0A8C4L062:A0A8C4L1G5:A0A8C4LBJ9:A0A8C4LGH9:A0A8C4L2K7		HCD
M2-1_2_RB1_1_8837.d	A(+42.01)STGPTK	F4:4173	7	89	89	7	703.366	1.2405-1.2567	0	702.355	6.1		Acetylation (N-term)	HCD
M2-1_RB1_1_8659.d	A(+42.01)EVEQK	F6:8508	6	89	89	6	745.37	1.2627-1.2789	0	744.365	-3.8	A0A8C4MTT5:A0A8C4LRW5	Acetylation (N-term)	HCD
M1_RB1_1_8657.d	A(+42.01)ATELR	F3:23420	6	89	89	6	702.379	1.2594-1.2756	0	701.371	1.5		Acetylation (N-term)	HCD
M2-1_2_RB1_1_8837.d	DAVRKL	F4:7379	6	89	89	6	351.219	0.7237-0.7403	2915	700.423	1.4	A0A8C4LD25		HCD
M1_3_RB1_1_8834.d	KPKLVK	F2:3273	6	89	89	6	356.758	0.7390-0.7556	0	711.501	1.9	A0A8C4LUC6:A0A8C4M5X3:A0A8C4M7H7		HCD
M2-1_RB1_1_8659.d	DEKADKV	F6:1546	7	89	89	7	402.71	0.7466-0.7633	1330.1	803.403	3.2			HCD
M1_RB1_1_8657.d	PPKLPH	F3:7199	6	89	89	6	344.71	0.7563-0.7730	131.49	687.407	-0.9			HCD
M1_2_RB1_1_8832.d	LVHQHSSRMDPQSHKVLL	F1:25558	18	89	89	18	704.71	0.9545-0.9709	5895	2111.11	1.8	B7VGF9:A0A8C4MBA7		HCD
M1_3_RB1_1_8834.d	YFKALKEKQKDEHKEY	F2:15375	16	89	89	16	521.775	0.8208-0.8374	4669	2083.07	-0.7	P86272:C3W972:A0A8C4MB72:A0A8C4LEX0:A0A8C4M6N0:A0A8C4PQ06:A0A8C4M9C8:A0A8C4M5V6:A0A8C4N0G9:A0A8C4N115:A0A8C4MZ04:A0A8C4MBW3:A0A8C4MFI5:A0A8C4MN77:A0A8C4MLN5:A0A8C4MLC7:A0A8C4MKX0:A0A8C4M686:A0A8C4MBZ9:A0A8C4MBY1:A0A8C4L602:A0A8C4L3K5:A0A8C4PSY6:A0A8C4MMW0		HCD
M1_RB1_1_8657.d	DLRKF	F3:15547	5	89	89	5	339.7	0.7077-0.7244	774.28	677.386	0.4			HCD
M2-1_RB1_1_8659.d	M(+42.01)DKLK	F6:17532	5	89	89	5	676.372	1.2337-1.2499	0	675.362	2.6		Acetylation (N-term)	HCD
M1_RB1_1_8657.d	LEEWE	F3:30655	5	89	89	5	705.31	1.1538-1.1701	0	704.302	1.7			HCD
M2-1_2_RB1_1_8837.d	LPSKKL	F4:7008	6	89	89	6	343.233	0.7097-0.7264	0	684.453	-3.8	A0A8C4LE80:A0A8C4KUV5:A0A8C4KTL4		HCD
M2-1_3_RB1_1_8839.d	GADKYF	F5:19810	6	89	89	6	350.67	0.7056-0.7223	3816.3	699.323	2.8	A0A8C4LEB1		HCD
M1_2_RB1_1_8832.d	DKDAKF	F1:7395	6	89	89	6	723.37	1.1979-1.2141	0	722.36	3.8	A0A8C4LBN5		HCD
M1_2_RB1_1_8832.d	DKYF	F1:23038	4	89	89	4	572.273	1.0994-1.1157	0	571.264	3.3			HCD
M2-1_3_RB1_1_8839.d	LLPTQT	F5:20488	6	89	89	6	672.393	1.2087-1.2249	0	671.385	0.3	A0A8C4LD23:A0A8C4ML69:A0A8C4PQX9:A0A8C4MA26:A0A8C4MDS9		HCD
M1_3_RB1_1_8834.d	EDEVKKL	F2:11966	7	89	89	7	430.742	0.7723-0.7889	142.04	859.465	4.9	A0A8C4KSW5:A0A8C4KST4:A0A8C4KUG4		HCD
M1_3_RB1_1_8834.d	GVN(+.98)LRHNKDKRV	F2:7652	12	89	89	12	479.608	0.7577-0.7744	1239.1	1435.8	0.8		Deamidation (NQ)	HCD
M1_RB1_1_8657.d	QPPLV	F3:31416	5	89	89	5	553.335	1.1096-1.1259	0	552.327	1.6			HCD
M2-1_2_RB1_1_8837.d	A(+42.01)STGPTK	F4:4245	7	89	89	7	703.366	1.2418-1.2580	0	702.355	5.5		Acetylation (N-term)	HCD
M1_3_RB1_1_8834.d	EN(+.98)EKMELK	F2:37857	8	89	89	8	511.247	0.8339-0.8505	153.44	1020.48	0	A0A8C4LCU6	Deamidation (NQ)	HCD
M2-1_2_RB1_1_8837.d	EANYLGADKYFHA	F4:27111	13	89	89	13	749.854	1.0059-1.0223	1032.2	1497.69	2.8	A0A8C4LEB1:A0A8C4MGQ5		HCD
M2-1_2_RB1_1_8837.d	LDDKKL	F4:4694	6	89	89	6	731.429	1.2735-1.2897	0	730.423	-0.6			HCD
M1_RB1_1_8657.d	LPRPPPP	F3:24667	7	89	89	7	387.237	0.7397-0.7563	3608.1	772.46	-0.3	A0A8C4LZT4		HCD
M1_3_RB1_1_8834.d	DDKLLK	F2:10698	6	89	89	6	366.219	0.7403-0.7570	576.5	730.423	0.5			HCD
M2-1_3_RB1_1_8839.d	LPTE	F5:9281	4	89	89	4	459.245	0.9812-0.9977	0	458.238	-0.2			HCD
M2-1_2_RB1_1_8837.d	DEELMTR	F4:12941	7	89	89	7	893.401	1.2796-1.2958	0	892.396	-3			HCD
M1_RB1_1_8657.d	PLTKT	F3:4259	5	89	89	5	280.176	0.7070-0.7237	623.71	558.338	0.2			HCD
M1_2_RB1_1_8832.d	ELLKEK	F1:10399	6	89	89	6	759.461	1.2783-1.2944	0	758.454	0.1	P86272:C3W972:A0A8C4M6N0:A0A8C4PQ06:A0A8C4M9C8:A0A8C4M5V6:A0A8C4N1R3:A0A8C4N0Z5:A0A8C4N0L6:A0A8C4MRJ8		HCD
M1_3_RB1_1_8834.d	DQPKVKV	F2:14387	7	89	89	7	407.245	0.7653-0.7820	177.93	812.476	0.3	A0A8C4M816		HCD
M1_3_RB1_1_8834.d	DVETVKKL	F2:20575	8	89	89	8	466.277	0.8118-0.8284	270.1	930.539	2	A0A8C4LKJ0		HCD
M2-1_RB1_1_8659.d	LDERL	F6:20953	5	89	89	5	645.353	1.2202-1.2364	0	644.349	-5.7			HCD
M1_2_RB1_1_8832.d	VK(+42.01)AFSN(+.98)GLAHLDNLK	F1:52514	15	89	89	15	835.454	1.1579-1.1741	512.27	1668.88	6.4	A0A8C4PFM4:D1MPT0:A0A8C4LJD7:A0A8C4LKU6	Acetylation (K); Deamidation (NQ)	HCD
M2-1_2_RB1_1_8837.d	APRAPPPGGPGASAPLPR	F4:19662	18	89	89	18	555.978	0.7917-0.8083	0	1664.91	1.5	A0A8C4N5V1:A0A8C4N1C2:A0A8C4PJ30:A0A8C4M4P4:A0A8C4N8C5:A0A8C4LBJ9:A0A8C4LGH9:A0A8C4L2K7		HCD
M2-1_RB1_1_8659.d	LPTQ	F6:6068	4	89	89	4	458.26	0.9970-1.0134	0	457.254	-1			HCD
M2-1_3_RB1_1_8839.d	MPFLK	F5:27064	5	89	89	5	635.356	1.1972-1.2134	0	634.351	-3.8			HCD
M2-1_2_RB1_1_8837.d	M(+42.01)EGAQ(+.98)EKK	F4:8044	8	89	89	8	482.229	0.8450-0.8615	1039	962.438	6.1		Acetylation (N-term); Deamidation (NQ)	HCD
M2-1_RB1_1_8659.d	HEGQQQGVEVEHQDK	F6:1103	15	89	89	15	583.269	0.8636-0.8802	101430	1746.79	-4.1	D2EC27:A0A8C4KT44		HCD
M2-1_3_RB1_1_8839.d	M(+42.01)DGFR	F5:26436	5	89	89	5	667.29	1.2148-1.2310	0	666.279	4.2		Acetylation (N-term)	HCD
M1_RB1_1_8657.d	PPPPKY	F3:26872	6	89	89	6	698.387	1.2297-1.2459	0	697.38	0.2			HCD
M2-1_2_RB1_1_8837.d	N(+.98)PDTRVK	F4:2454	7	89	89	7	415.722	0.7681-0.7848	397.96	829.429	0.2		Deamidation (NQ)	HCD
M2-1_RB1_1_8659.d	A(+42.01)STGPTK	F6:4261	7	89	89	7	703.364	1.2513-1.2675	0	702.355	2.1		Acetylation (N-term)	HCD
M1_3_RB1_1_8834.d	SLSSKLRS	F2:12013	8	89	89	8	439.259	0.8228-0.8394	0	876.503	0	A0A8C4MSR3:A0A8C4N8C5:A0A8C4LSJ3:A0A8C4LU33		HCD
M1_2_RB1_1_8832.d	PPPPKY	F1:32882	6	89	89	6	698.383	1.2276-1.2438	0	697.38	-6.1			HCD
M1_2_RB1_1_8832.d	PPPGGPGASAPLRP	F1:24748	14	89	89	14	635.852	0.9867-1.0031	5638.9	1269.68	5.1	A0A8C4N5V1:A0A8C4N1C2:A0A8C4PJ30:A0A8C4M4P4:A0A8C4N8C5:A0A8C4LBJ9:A0A8C4LGH9:A0A8C4L2K7		HCD
M1_3_RB1_1_8834.d	LDERL	F2:27324	5	89	89	5	645.356	1.2080-1.2243	0	644.349	-0.9			HCD
M2-1_3_RB1_1_8839.d	LPEEE	F5:9791	5	89	89	5	616.286	1.1293-1.1456	0	615.275	6			HCD
M2-1_2_RB1_1_8837.d	YVAVEVPKKEQ	F4:7742	11	89	89	11	645.355	0.9675-0.9839	122.37	1288.7	-5.5			HCD
M1_2_RB1_1_8832.d	EEDKLRT	F1:6387	7	89	89	7	445.735	0.7903-0.8069	524.18	889.451	5.5			HCD
M1_3_RB1_1_8834.d	EM(+15.99)PFPK	F2:18546	6	89	89	6	382.687	0.7889-0.8055	8740.1	763.357	2		Oxidation (M)	HCD
M1_RB1_1_8657.d	SLTN(+.98)KLELTKEE	F3:34136	12	89	89	12	703.377	1.0257-1.0421	424.46	1404.73	3	A0A8C4LTE2:A0A8C4M6N0:A0A8C4PQ06:A0A8C4M9C8:A0A8C4M5V6:A0A8C4MUK2	Deamidation (NQ)	HCD
M1_2_RB1_1_8832.d	KLELTKEE	F1:16319	8	89	89	8	495.282	0.8215-0.8381	247.99	988.544	6.2	A0A8C4LTE2:A0A8C4M6N0:A0A8C4PQ06:A0A8C4M9C8:A0A8C4M5V6:A0A8C4MUK2		HCD
M1_3_RB1_1_8834.d	DLVKAL	F2:36089	6	89	89	6	658.413	1.1972-1.2134	0	657.406	-0.3	A0A8C4PRM9		HCD
M1_RB1_1_8657.d	VEKGPKV	F3:17759	7	89	89	7	378.733	0.7285-0.7452	252.6	755.454	-4			HCD
M2-1_RB1_1_8659.d	AM(+15.99)EDLK	F6:3690	6	89	89	6	722.336	1.2607-1.2769	0	721.332	-4.1	A0A8C4PSU1	Oxidation (M)	HCD
M1_2_RB1_1_8832.d	PPPPYK	F1:21504	6	89	89	6	698.39	1.2148-1.2310	0	697.38	4.2			HCD
M2-1_3_RB1_1_8839.d	A(+42.01)EEVEEERLK	F5:22590	10	89	89	10	637.319	0.9462-0.9627	1385.2	1272.62	2.4	A0A8C4L5S0:A0A8C4MQZ7:A0A8C4M487:A0A8C4M0J3	Acetylation (N-term)	HCD
M1_2_RB1_1_8832.d	LDSKKL	F1:13685	6	89	89	6	352.221	0.7174-0.7341	143.95	702.428	-0.7			HCD
M2-1_2_RB1_1_8837.d	EDPKRP	F4:1904	6	89	89	6	371.2	0.7223-0.7390	798.83	740.382	4.1			HCD
M2-1_2_RB1_1_8837.d	HESTNLSQ	F4:4007	8	89	89	8	915.417	1.2803-1.2964	0	914.409	-0.1	C1L3G3		HCD
M1_2_RB1_1_8832.d	HESTNLS(+79.97)EEKYK	F1:12096	12	89	89	12	772.84	1.0387-1.0551	18231	1543.66	6.3	C1L3G3:A0A8C4LTE2	Phosphorylation (STY)	HCD
M2-1_RB1_1_8659.d	GPPPP	F6:6548	5	89	89	5	464.253	0.9977-1.0141	0	463.243	5.2			HCD
M1_RB1_1_8657.d	A(+42.01)STGPTKRQTLE	F3:16249	12	89	89	12	665.854	0.9826-0.9990	18016	1329.69	3.6		Acetylation (N-term)	HCD
M1_2_RB1_1_8832.d	APPPAP	F1:12440	6	89	89	6	549.306	1.0503-1.0667	0	548.296	4.3	A0A8C4M4P4:A0A8C4MG23:A0A8C4MHC3:A0A8C4LA55:A0A8C4KUB0:A0A8C4M1Y3:A0A8C4M2V3:A0A8C4M099:A0A8C4M5N7		HCD
M2-1_RB1_1_8659.d	APRAPPPGGPGASAPLPR	F6:19551	18	89	89	18	555.979	0.8581-0.8746	10294	1664.91	2.9	A0A8C4N5V1:A0A8C4N1C2:A0A8C4PJ30:A0A8C4M4P4:A0A8C4N8C5:A0A8C4LBJ9:A0A8C4LGH9:A0A8C4L2K7		HCD
M2-1_2_RB1_1_8837.d	EKPPP	F4:4874	5	89	89	5	567.314	1.0878-1.1042	0	566.306	0.7			HCD
M1_RB1_1_8657.d	DEEKNF	F3:11152	6	89	89	6	781.339	1.2614-1.2776	0	780.329	4			HCD
M1_RB1_1_8657.d	DPATQPLVVPHNPVLN	F3:47339	16	89	89	16	855.966	1.1035-1.1198	54307	1709.91	4.8	D2EC27		HCD
M1_RB1_1_8657.d	A(+42.01)VPTW	F3:26447	5	89	89	5	615.314	1.1395-1.1558	0	614.306	0.9		Acetylation (N-term)	HCD
M2-1_RB1_1_8659.d	S(+79.97)EEKVQKF	F6:12603	8	89	89	8	537.748	0.8408-0.8574	25279	1073.48	2.3	D2EC27:A0A8C4KT44:A0A8C4MNE2:A0A8C4MD75:A0A8C4PRJ1:A0A8C4MEB5:A0A8C4MCX6:A0A8C4PRX7	Phosphorylation (STY)	HCD
M1_3_RB1_1_8834.d	SVRLED	F2:15278	6	89	89	6	359.692	0.7202-0.7369	831.3	717.366	4.7	A0A8C4LD23		HCD
M2-1_2_RB1_1_8837.d	DPPME	F4:11301	5	89	89	5	588.236	1.0824-1.0987	0	587.226	4.7			HCD
M1_RB1_1_8657.d	ELTKEEKLYLK	F3:25220	11	89	89	11	465.27	0.8083-0.8249	8621.2	1392.79	0.7	A0A8C4M7I4:A0A8C4LTE2:A0A8C4MQW4:A0A8C4PU43		HCD
M1_2_RB1_1_8832.d	M(+42.01)Q(+.98)GAEEKKKKKL	F1:8584	12	89	89	12	487.613	0.7612-0.7778	1426.2	1459.81	5.9	A0A8C4LPN9:A0A8C4MD96:A0A8C4MLY4:A0A8C4MMG4:A0A8C4LYI3:A0A8C4M135:A0A8C4M712:A0A8C4MP75:A0A8C4L946:A0A8C4LA58:A0A8C4L2G1:A0A8C4L6W9:A0A8C4MGD3:A0A8C4LRW5:A0A8C4KUB0:A0A8C4PS52:A0A8C4L727:A0A8C4L5Z6:A0A8C4M1Y3:A0A8C4M2V3:A0A8C4M099:A0A8C4M5N7:A0A8C4LZT9:A0A8C4KQK5:A0A8C4PL28:A0A8C4LLN8:A0A8C4LJP8:A0A8C4MQT7:A0A8C4MPM2:A0A8C4MNE2:A0A8C4MD75:A0A8C4PRJ1:A0A8C4MEB5:A0A8C4MCX6:A0A8C4PRX7:A0A8C4PGF3:A0A…	Acetylation (N-term); Deamidation (NQ)	HCD
M1_3_RB1_1_8834.d	M(+42.01)EGAEEKK	F2:10580	8	89	89	8	482.227	0.8422-0.8588	0	962.438	1.1		Acetylation (N-term)	HCD
M1_RB1_1_8657.d	RPPPP	F3:4920	5	89	89	5	563.331	1.0865-1.1028	0	562.323	2.5			HCD
M1_2_RB1_1_8832.d	VPPKKV	F1:4125	6	89	89	6	334.23	0.7216-0.7383	538.28	666.443	4.3			HCD
M1_2_RB1_1_8832.d	SPLPDL	F1:48850	6	89	89	6	641.354	1.1714-1.1877	0	640.343	5.4	A0A8C4L6A6		HCD
M1_3_RB1_1_8834.d	APLKPHNSTPLKCL	F2:22869	14	89	89	14	506.954	0.7882-0.8049	2359	1517.84	0.8			HCD
M2-1_2_RB1_1_8837.d	HESTNLS(+79.97)QEKY	F4:13459	11	89	89	11	708.298	0.9785-0.9949	268430	1414.58	3.7	B7VGF9:C1L3G3	Phosphorylation (STY)	HCD
M2-1_2_RB1_1_8837.d	HEEQ(+.98)EECH	F4:8670	8	89	89	8	521.181	0.8753-0.8919	305.73	1040.35	-3.4	A0A8C4LYI3:A0A8C4M135:A0A8C4M712	Deamidation (NQ)	HCD
M2-1_3_RB1_1_8839.d	EPPGPL	F5:22926	6	89	89	6	609.326	1.1389-1.1552	0	608.317	2.9			HCD
M1_RB1_1_8657.d	MPFLK	F3:37995	5	89	89	5	635.361	1.2148-1.2310	0	634.351	3.4			HCD
M1_2_RB1_1_8832.d	A(+42.01)PPVKKL	F1:28624	7	89	89	7	397.762	0.7653-0.7820	349.98	793.506	3		Acetylation (N-term)	HCD
M1_3_RB1_1_8834.d	LDVKAL	F2:36240	6	89	89	6	658.416	1.1985-1.2148	0	657.406	4.7			HCD
M2-1_2_RB1_1_8837.d	S(+79.97)REKVLK	F4:3336	7	89	89	7	470.257	0.8235-0.8401	7028.3	938.495	3.6	P86272:C3W972:A0A8C4LYI3:A0A8C4M135:A0A8C4M712	Phosphorylation (STY)	HCD
M2-1_2_RB1_1_8837.d	M(+15.99)EEEEE	F4:11493	6	89	89	6	811.261	1.2776-1.2938	0	810.259	-6.1	A0A8C4PPH6:A0A8C4LTE0:A0A8C4L602:A0A8C4L3K5	Oxidation (M)	HCD
M1_RB1_1_8657.d	TPKGEKFPSMSEA	F3:26196	13	89	89	13	704.844	1.0045-1.0209	5386.3	1407.67	1.8	A0A8C4LD23		HCD
M2-1_2_RB1_1_8837.d	LPLALE	F4:30087	6	89	89	6	655.404	1.2141-1.2303	0	654.395	2.8	A0A8C4L992		HCD
M1_2_RB1_1_8832.d	TQPLVPVHNPVLN	F1:45044	13	89	89	13	714.407	0.9860-1.0024	386.36	1426.79	4.3	D2EC27		HCD
M1_3_RB1_1_8834.d	DGSKLKL	F2:21725	7	89	89	7	380.732	0.7542-0.7709	0	759.449	1.1	A0A8C4PKP7		HCD
M2-1_2_RB1_1_8837.d	N(+42.01)PPKAPSKKE	F4:5260	10	89	89	10	569.317	0.8581-0.8746	1408.1	1136.62	0.7	A0A8C4M2F8:A0A8C4PP55:A0A8C4M526:A0A8C4PSX3	Acetylation (N-term)	HCD
M2-1_RB1_1_8659.d	DEDGN(+.98)N(+.98)LLHH	F6:16170	10	89	89	10	583.243	0.8960-0.9125	572.97	1164.47	2.6	A0A8C4L0V4	Deamidation (NQ)	HCD
M1_RB1_1_8657.d	APARPPPGGPGASAPLPR	F3:24846	18	89	89	18	555.979	0.8891-0.9056	73572	1664.91	3.4	A0A8C4N5V1:A0A8C4N1C2:A0A8C4PJ30:A0A8C4M4P4:A0A8C4N8C5:A0A8C4LUX7:A0A8C4M1X1:A0A8C4LF53:A0A8C4LF38:A0A8C4LBJ9:A0A8C4LGH9:A0A8C4L2K7:A0A8C4PQY9		HCD
M1_3_RB1_1_8834.d	TGEFD	F2:13251	5	89	89	5	568.228	1.0728-1.0892	0	567.218	6.1			HCD
M2-1_2_RB1_1_8837.d	S(+79.97)EEKVQKF	F4:12529	8	89	89	8	537.75	0.8332-0.8498	22922	1073.48	5.3	D2EC27:A0A8C4KT44:A0A8C4MNE2:A0A8C4MD75:A0A8C4PRJ1:A0A8C4MEB5:A0A8C4MCX6:A0A8C4PRX7	Phosphorylation (STY)	HCD
M2-1_RB1_1_8659.d	EKVLK	F6:2130	5	89	89	5	308.707	0.7035-0.7202	1299.4	615.395	5.6			HCD
M2-1_RB1_1_8659.d	KHESTNLS(+79.97)QEKKY	F6:5854	13	89	89	13	836.389	1.0851-1.1014	35269	1670.77	-2	B7VGF9:C1L3G3	Phosphorylation (STY)	HCD
M1_3_RB1_1_8834.d	ETLLPK	F2:26469	6	89	89	6	350.716	0.7327-0.7494	16240	699.417	1.7	D2EC27		HCD
M1_2_RB1_1_8832.d	DVPRKV	F1:7068	6	89	89	6	357.218	0.7091-0.7258	2779.6	712.423	-3.5			HCD
M1_RB1_1_8657.d	APPPP	F3:9807	5	89	89	5	478.267	1.0134-1.0298	0	477.259	1.1			HCD
M1_RB1_1_8657.d	TPLVKKL	F3:21038	7	89	89	7	399.775	0.7875-0.8042	111.93	797.537	-2.2	A0A8C4LZ03:A0A8C4LJD7:A0A8C4LKU6		HCD
M2-1_3_RB1_1_8839.d	DKYLK	F5:4649	5	89	89	5	333.695	0.7181-0.7348	0	665.375	1.2			HCD
M1_2_RB1_1_8832.d	GPFPL	F1:51444	5	89	89	5	530.297	1.0728-1.0892	0	529.29	-1.5			HCD
M1_RB1_1_8657.d	VADVTLDPN(+.98)TAHPH	F3:31448	14	89	89	14	744.36	1.0537-1.0701	1568.5	1486.71	0.8	A0A8C4LD23:A0A8C4KWG8	Deamidation (NQ)	HCD
M1_2_RB1_1_8832.d	LDVKAL	F1:36182	6	89	89	6	658.413	1.1972-1.2134	0	657.406	-1.3			HCD
M2-1_RB1_1_8659.d	ELLKEK	F6:8063	6	89	89	6	380.236	0.7799-0.7965	116560	758.454	3.9	P86272:C3W972:A0A8C4M6N0:A0A8C4PQ06:A0A8C4M9C8:A0A8C4M5V6:A0A8C4N1R3:A0A8C4N0Z5:A0A8C4N0L6:A0A8C4MRJ8		HCD
M2-1_2_RB1_1_8837.d	SKSRKF	F4:206	6	89	89	6	376.725	0.7403-0.7570	0	751.434	2.2	A0A8C4LXL5		HCD
M1_2_RB1_1_8832.d	LPVHLL	F1:47764	6	89	89	6	691.453	1.2627-1.2789	0	690.443	4.6	D2EC27		HCD
M1_2_RB1_1_8832.d	AHPHLF	F1:24973	6	89	89	6	721.38	1.2506-1.2668	0	720.371	3.2	A0A8C4LD23		HCD
M2-1_3_RB1_1_8839.d	VEEKKV	F5:1761	6	89	89	6	366.22	0.7223-0.7390	440.43	730.423	4.6			HCD
M1_RB1_1_8657.d	LDPKKL	F3:11512	6	89	89	6	357.231	0.7410-0.7577	365.62	712.448	-0.8			HCD
M1_2_RB1_1_8832.d	LDERL	F1:25227	5	89	89	5	645.359	1.1965-1.2128	0	644.349	3.3			HCD
M1_RB1_1_8657.d	PATQPLVPVHNPVLN	F3:45132	15	89	89	15	798.454	1.0646-1.0810	20789	1594.88	6.4	D2EC27		HCD
M2-1_RB1_1_8659.d	SLSSKRL	F6:8832	7	89	89	7	395.744	0.7848-0.8014	169.99	789.471	3.1			HCD
M1_RB1_1_8657.d	PPPPPKY	F3:27472	7	89	89	7	795.442	1.2810-1.2971	0	794.433	2.6	A0A8C4MG23:A0A8C4LIL0:A0A8C4LI36:A0A8C4LRB2:A0A8C4LSK6:A0A8C4LC31:A0A8C4MYX8:A0A8C4MU64:A0A8C4PU53:A0A8C4L727:A0A8C4L5Z6		HCD
M1_RB1_1_8657.d	PPPPYK	F3:22903	6	89	89	6	698.387	1.2033-1.2195	0	697.38	-0.5			HCD
M1_RB1_1_8657.d	S(+79.97)LSSKLR	F3:16404	7	89	89	7	435.725	0.8104-0.8270	0	869.437	-1	A0A8C4MSR3:A0A8C4N8C5:A0A8C4LSJ3:A0A8C4LU33	Phosphorylation (STY)	HCD
M1_2_RB1_1_8832.d	DN(+.98)GLSAAARKQ	F1:11498	11	89	89	11	566.294	0.8898-0.9063	1396.4	1130.57	5.6	A0A8C4MP75:A0A8C4LZI7:A0A8C4LSX9:A0A8C4LQG6:A0A8C4LSB3:A0A8C4LRV3	Deamidation (NQ)	HCD
M1_RB1_1_8657.d	ENGVLR	F3:19351	6	89	89	6	687.378	1.2236-1.2398	0	686.371	-1.1			HCD
M2-1_3_RB1_1_8839.d	DKLELTKEE	F5:15927	9	89	89	9	552.795	0.8712-0.8877	221.29	1103.57	3.5	A0A8C4LTE2:A0A8C4M6N0:A0A8C4PQ06:A0A8C4M9C8:A0A8C4M5V6:A0A8C4MUK2		HCD
M1_2_RB1_1_8832.d	EVQ(+.98)DPKSKKDA	F1:2831	11	89	89	11	623.323	0.8988-0.9153	423.61	1244.62	6.3		Deamidation (NQ)	HCD
M1_RB1_1_8657.d	LPSGSKKV	F3:7599	8	89	89	8	408.252	0.7570-0.7737	419.6	814.491	-1.1			HCD
M2-1_RB1_1_8659.d	DDKLLK	F6:7955	6	89	89	6	731.43	1.2756-1.2917	0	730.423	0.7			HCD
M2-1_RB1_1_8659.d	VEDLPNKKV	F6:21390	9	89	89	9	521.302	0.8643-0.8808	2604.4	1040.59	2.4			HCD
M2-1_RB1_1_8659.d	DEARPKGP	F6:3986	8	89	89	8	435.228	0.7841-0.8007	1761.1	868.44	2.2			HCD
M2-1_2_RB1_1_8837.d	EPVKKL	F4:5459	6	89	89	6	357.234	0.7348-0.7515	6009	712.448	6.9	A0A8C4MAC7:A0A8C4PQV7:A0A8C4MHP1:A0A8C4MKT7:A0A8C4MCS3		HCD
M2-1_2_RB1_1_8837.d	DKYHF	F4:8440	5	89	89	5	355.171	0.7424-0.7591	5073.4	708.323	5.4			HCD
M1_RB1_1_8657.d	HLPHFL	F3:37938	6	89	89	6	382.216	0.7751-0.7917	3675	762.418	-1.1			HCD
M1_3_RB1_1_8834.d	T(+42.01)LSKVLLP	F2:49313	8	89	89	8	456.794	0.8132-0.8298	137.43	911.569	4.1	A0A8C4MSY6:A0A8C4PU45:A0A8C4MQ72:A0A8C4ML18:A0A8C4MQF3:A0A8C4MGF2:A0A8C4L8T7:A0A8C4PII1	Acetylation (N-term)	HCD
M1_2_RB1_1_8832.d	TLLPRK	F1:15089	6	89	89	6	364.247	0.7647-0.7813	1049.6	726.475	5.5			HCD
M1_3_RB1_1_8834.d	LQ(+.98)FAGAPKTRL	F2:26900	11	89	89	11	401.569	0.7403-0.7570	1838.2	1201.68	3.3		Deamidation (NQ)	HCD
M1_3_RB1_1_8834.d	M(+42.01)(+15.99)LKLF	F2:55848	5	89	89	5	709.395	1.2762-1.2924	0	708.388	0		Acetylation (N-term); Oxidation (M)	HCD
M1_2_RB1_1_8832.d	QPELM(+15.99)E	F1:18491	6	89	89	6	762.333	1.2526-1.2688	0	761.327	-0.6	D2EC27	Oxidation (M)	HCD
M1_RB1_1_8657.d	EDEN(+.98)KAFKQ	F3:10466	9	89	89	9	555.26	0.8719-0.8884	280.75	1108.5	0.9	A0A8C4M686:A0A8C4MBZ9:A0A8C4MBY1	Deamidation (NQ)	HCD
M2-1_RB1_1_8659.d	DNKQLLR	F6:8108	7	89	89	7	443.759	0.7855-0.8021	234.21	885.503	-0.9			HCD
M2-1_RB1_1_8659.d	DGQ(+.98)KTERL	F6:6452	8	89	89	8	474.243	0.8284-0.8450	528.43	946.472	-1.6	A0A8C4M2J5:A0A8C4M504:A0A8C4M0V7:A0A8C4M166	Deamidation (NQ)	HCD
M1_RB1_1_8657.d	PDKY	F3:16313	4	89	89	4	522.255	1.0783-1.0946	0	521.249	-1.2			HCD
M2-1_RB1_1_8659.d	EEN(+.98)EDAYKKQF	F6:15962	11	89	89	11	701.315	0.9750-0.9915	593.49	1400.61	3.7	A0A8C4PQB2:A0A8C4LLG0	Deamidation (NQ)	HCD
M1_2_RB1_1_8832.d	APLKPH	F1:4882	6	89	89	6	331.705	0.7202-0.7369	894.17	661.391	5.9			HCD
M1_2_RB1_1_8832.d	DGN(+.98)KPVRM	F1:11860	8	89	89	8	459.231	0.7813-0.7979	3043.5	916.444	5.2		Deamidation (NQ)	HCD
M1_2_RB1_1_8832.d	PAATSANL	F1:21698	8	89	89	8	744.386	1.2540-1.2702	0	743.381	-3.6	A0A8C4MN72		HCD
M1_2_RB1_1_8832.d	VLPKRK	F1:4183	6	89	89	6	370.763	0.7674-0.7841	18913	739.507	6.5			HCD
M1_RB1_1_8657.d	PRPPGGPGASAPLRP	F3:22424	15	89	89	15	476.268	0.7834-0.8000	11747	1425.78	-0.8	A0A8C4N5V1:A0A8C4N1C2:A0A8C4PJ30:A0A8C4M4P4:A0A8C4N8C5:A0A8C4LBJ9:A0A8C4LGH9:A0A8C4L2K7		HCD
M1_2_RB1_1_8832.d	DSEKKPKL	F1:4250	8	89	89	8	472.776	0.8173-0.8339	200.97	943.534	5			HCD
M1_RB1_1_8657.d	YK(+42.01)FVK(+42.01)ATPGKY	F3:22164	11	89	89	11	462.586	0.7986-0.8152	4228	1384.74	-2.5		Acetylation (K)	HCD
M2-1_RB1_1_8659.d	EHSTNLSQEKYK	F6:6214	12	89	89	12	488.577	0.8097-0.8263	22386	1462.71	2.6	B7VGF9:C1L3G3:A0A8C4MHP1:A0A8C4MKT7:A0A8C4MCS3		HCD
M1_RB1_1_8657.d	Q(+.98)LTVSSKV	F3:43295	8	89	89	8	431.747	0.7952-0.8118	689.57	861.481	-2.2		Deamidation (NQ)	HCD
M1_3_RB1_1_8834.d	EEDKRTL	F2:6383	7	89	89	7	445.733	0.7875-0.8042	435.97	889.451	0.9	A0A8C4PSX4		HCD
M2-1_RB1_1_8659.d	ELLKTL	F6:24860	6	89	89	6	716.454	1.2742-1.2904	0	715.448	-1.6	A0A8C4LIL0:A0A8C4LI36:A0A8C4MEU3		HCD
M2-1_3_RB1_1_8839.d	LPPPP	F5:22353	5	89	89	5	520.315	1.0544-1.0708	0	519.306	3.6			HCD
M1_RB1_1_8657.d	VEDKTKV	F3:11271	7	89	89	7	409.735	0.7667-0.7834	156.78	817.455	1.4			HCD
M2-1_2_RB1_1_8837.d	EPVKKL	F4:5499	6	89	89	6	713.456	1.2466-1.2627	0	712.448	0.9	A0A8C4MAC7:A0A8C4PQV7:A0A8C4MHP1:A0A8C4MKT7:A0A8C4MCS3		HCD
M1_RB1_1_8657.d	DGN(+.98)KPVRM	F3:11712	8	89	89	8	459.23	0.7889-0.8055	3212	916.444	1.3		Deamidation (NQ)	HCD
M2-1_2_RB1_1_8837.d	HESTNLS(+79.97)QEYK	F4:13230	11	89	89	11	708.298	0.9627-0.9792	268430	1414.58	3.7	C1L3G3	Phosphorylation (STY)	HCD
M2-1_RB1_1_8659.d	DEEGLKKL	F6:15257	8	89	89	8	466.259	0.8097-0.8263	682.45	930.502	0.5	A0A8C4M144:A0A8C4MEI5:A0A8C4MEJ9:A0A8C4M6Y4:A0A8C4M530:A0A8C4MMY0:A0A8C4MLM0:A0A8C4MML9:A0A8C4MXX8		HCD
M1_RB1_1_8657.d	VSPLPDLFPADFK	F3:56732	13	89	89	13	723.387	1.0278-1.0442	5867.6	1444.76	-0.9	A0A8C4L6A6		HCD
M1_RB1_1_8657.d	T(+42.01)KLSLPK	F3:18289	7	89	89	7	414.762	0.7806-0.7972	1118.3	827.512	-2.8	A0A8C4L8U6	Acetylation (N-term)	HCD
M1_2_RB1_1_8832.d	EPPPPP	F1:15367	6	89	89	6	633.325	1.1456-1.1619	0	632.317	1.7	A0A8C4LZT4		HCD
M2-1_3_RB1_1_8839.d	APVKKL	F5:4596	6	89	89	6	328.23	0.7195-0.7362	596.59	654.443	4.3	A0A8C4L0K2		HCD
M2-1_3_RB1_1_8839.d	A(+42.01)EEVEQ(+.98)ERLK	F5:22619	10	89	89	10	637.319	0.9455-0.9620	1385.2	1272.62	2.4		Acetylation (N-term); Deamidation (NQ)	HCD
M1_RB1_1_8657.d	EKVQKFKHEGQQQSRE	F3:3856	16	89	89	16	662.677	0.8443-0.8608	20801	1985.01	1.1	D2EC27		HCD
M1_RB1_1_8657.d	ALPLLQK	F3:37338	7	89	89	7	391.76	0.7709-0.7875	12446	781.506	-2.2	A0A8C4MSR3:A0A8C4MXA0		HCD
M2-1_RB1_1_8659.d	A(+42.01)EVEQK	F6:8422	6	89	89	6	745.378	1.2661-1.2823	0	744.365	6.9	A0A8C4MTT5:A0A8C4LRW5	Acetylation (N-term)	HCD
M1_RB1_1_8657.d	VQKFK	F3:3895	5	89	89	5	649.405	1.2364-1.2526	0	648.396	2.6			HCD
M2-1_2_RB1_1_8837.d	QEKYK	F4:7531	5	89	89	5	695.372	1.0216-1.0380	0	694.365	-0.6			HCD
M2-1_3_RB1_1_8839.d	FPADF	F5:29662	5	89	89	5	596.274	1.1185-1.1348	0	595.264	4.2			HCD
M2-1_2_RB1_1_8837.d	EPVKKV	F4:2581	6	89	89	6	699.443	1.2256-1.2418	0	698.433	5.1	A0A8C4M5J3:A0A8C4M6R7:A0A8C4KZL8		HCD
M2-1_2_RB1_1_8837.d	EDGHVKV	F4:5935	7	89	89	7	783.398	1.2769-1.2931	0	782.392	-1.6			HCD
M2-1_2_RB1_1_8837.d	LPKRKV	F4:2055	6	89	89	6	370.762	0.7792-0.7958	1889.6	739.507	3.4	D2EC27		HCD
M1_3_RB1_1_8834.d	DLPLVH	F2:35713	6	89	89	6	693.394	1.2263-1.2425	0	692.386	2.1			HCD
M1_3_RB1_1_8834.d	LPEKEP	F2:11655	6	89	89	6	356.699	0.7577-0.7744	8494.8	711.38	4.3			HCD
M2-1_2_RB1_1_8837.d	QRELLK	F4:7874	6	89	89	6	393.747	0.7424-0.7591	2465.2	785.476	3.4	P86272:C3W972:A0A8C4LY35:A0A8C4PLI8:A0A8C4LSS1:A0A8C4LN05:A0A8C4LJR9:A0A8C4LDV7		HCD
M2-1_2_RB1_1_8837.d	S(+79.97)EVDKKL	F4:9562	7	89	89	7	449.719	0.7813-0.7979	2046.8	897.421	2.3	A0A8C4LD25	Phosphorylation (STY)	HCD
M2-1_2_RB1_1_8837.d	KHESTNLS(+79.97)QEKY	F4:10271	12	89	89	12	772.348	1.0031-1.0196	39681	1542.67	6.7	B7VGF9:C1L3G3	Phosphorylation (STY)	HCD
M2-1_RB1_1_8659.d	DKGKQLSDL	F6:16279	9	89	89	9	502.272	0.8291-0.8457	473.02	1002.53	-5	A0A8C4LQF5		HCD
M1_3_RB1_1_8834.d	EATGPTKQRTLE	F2:16765	12	89	89	12	665.853	0.9908-1.0072	2579.2	1329.69	1.9			HCD
M1_3_RB1_1_8834.d	LPEKPE	F2:11733	6	89	89	6	712.391	1.2161-1.2324	0	711.38	4.9	A0A8C4LD23		HCD
M1_RB1_1_8657.d	AGPLLE	F3:31801	6	89	89	6	599.343	1.1565-1.1728	0	598.333	5.9			HCD
M1_RB1_1_8657.d	GPFPL	F3:50419	5	89	89	5	530.297	1.0851-1.1014	0	529.29	-0.1			HCD
M1_RB1_1_8657.d	KHESTNLSQEKY	F3:10163	12	89	89	12	732.361	1.0072-1.0237	1356.5	1462.71	2.1	B7VGF9:C1L3G3		HCD
M1_3_RB1_1_8834.d	DPATQPLVVPHNPVLN	F2:47969	16	89	89	16	855.968	1.0926-1.1089	50206	1709.91	6.8	D2EC27		HCD
M1_2_RB1_1_8832.d	VM(+15.99)PFLK	F1:31427	6	89	89	6	375.715	0.7813-0.7979	4189.9	749.415	1.8	D2EC27	Oxidation (M)	HCD
M2-1_2_RB1_1_8837.d	PDKY	F4:13102	4	89	89	4	522.258	1.0646-1.0810	0	521.249	4.5			HCD
M1_2_RB1_1_8832.d	YPVEPFH	F1:35655	7	89	89	7	444.719	0.8381-0.8546	105.84	887.418	6.8			HCD
M2-1_3_RB1_1_8839.d	EEEKNYL	F5:17137	7	89	89	7	462.72	0.8076-0.8242	1555.3	923.424	2.6	B7VGF9:C1L3G3		HCD
M1_2_RB1_1_8832.d	LPVPE	F1:32345	5	89	89	5	554.318	1.1123-1.1287	0	553.311	-1.2			HCD
M1_3_RB1_1_8834.d	EPVKKV	F2:4417	6	89	89	6	699.442	1.2276-1.2438	0	698.433	3	A0A8C4M5J3:A0A8C4M6R7:A0A8C4KZL8		HCD
M2-1_3_RB1_1_8839.d	APRAPPPGGPGASAPLRP	F5:19852	18	89	89	18	555.978	0.8498-0.8664	10951	1664.91	1.5	A0A8C4N5V1:A0A8C4N1C2:A0A8C4PJ30:A0A8C4M4P4:A0A8C4N8C5:A0A8C4LBJ9:A0A8C4LGH9:A0A8C4L2K7		HCD
M1_3_RB1_1_8834.d	DLDHLVKL	F2:45420	8	89	89	8	476.776	0.8381-0.8546	0	951.539	-2.6	A0A8C4L602:A0A8C4L3K5		HCD
M1_RB1_1_8657.d	HSADVSLAMLKPDPSQK	F3:38526	17	89	89	17	608.648	0.9332-0.9496	94018	1822.92	-1.3	A0A8C4LXL5:A0A8C4MLW6		HCD
M2-1_2_RB1_1_8837.d	DDLAKV	F4:15348	6	89	89	6	660.359	1.2330-1.2493	0	659.349	3.6	A0A8C4LJ03:A0A8C4LZ41:A0A8C4LYI1:A0A8C4M487:A0A8C4M0J3		HCD
M2-1_3_RB1_1_8839.d	PPPPP	F5:9674	5	89	89	5	504.282	1.0346-1.0510	0	503.274	0.9			HCD
M1_2_RB1_1_8832.d	LPVL	F1:47409	4	89	89	4	441.308	1.0052-1.0216	0	440.3	3.1			HCD
M1_RB1_1_8657.d	EVPKKV	F3:4268	6	89	89	6	350.225	0.7264-0.7431	3586.8	698.433	3.7			HCD
M1_2_RB1_1_8832.d	HSDAVSLAMLKPDPSKQ	F1:35705	17	89	89	17	608.652	0.9029-0.9194	53539	1822.92	4.3	A0A8C4LXL5:A0A8C4MLW6		HCD
M1_2_RB1_1_8832.d	NPSKPKKL	F1:5236	8	89	89	8	456.285	0.7993-0.8159	131.88	910.56	-5.5	A0A8C4MZE5:A0A8C4KY28:A0A8C4MDL7:A0A8C4L9W5:A0A8C4MMM1:A0A8C4PNY0		HCD
M1_3_RB1_1_8834.d	TLLPRK	F2:19085	6	89	89	6	364.245	0.7605-0.7771	1056.2	726.475	1.3			HCD
M1_RB1_1_8657.d	DPNHF	F3:11485	5	89	89	5	629.272	1.1497-1.1660	0	628.26	6.7			HCD
M1_2_RB1_1_8832.d	LPPEVN	F1:23712	6	89	89	6	668.364	1.1674-1.1836	0	667.354	3.4			HCD
M1_RB1_1_8657.d	VPVVTTL	F3:45901	7	89	89	7	728.45	1.2688-1.2850	0	727.448	-6.9	A0A8C4MKK5		HCD
M1_2_RB1_1_8832.d	WPEL	F1:51757	4	89	89	4	544.279	1.0878-1.1042	0	543.269	4.1			HCD
M2-1_RB1_1_8659.d	DSNSLRL	F6:16129	7	89	89	7	402.715	0.7640-0.7806	457.68	803.414	1.2			HCD
M1_3_RB1_1_8834.d	ELVPKKT	F2:9464	7	89	89	7	407.757	0.7716-0.7882	6415.6	813.496	4.5			HCD
M1_3_RB1_1_8834.d	HSDAVSLMALKPD	F2:41830	13	89	89	13	692.353	0.9997-1.0161	2057.3	1382.69	3.7	A0A8C4LXL5		HCD
M1_2_RB1_1_8832.d	ETLLPK	F1:26612	6	89	89	6	350.716	0.7737-0.7903	9292.9	699.417	2.6	D2EC27		HCD
M2-1_2_RB1_1_8837.d	TPKGEKFSPMS	F4:18452	11	89	89	11	604.804	0.8802-0.8967	2202.1	1207.59	2.5			HCD
M1_3_RB1_1_8834.d	FPSPQY	F2:36397	6	89	89	6	738.342	1.2594-1.2756	0	737.338	-5.6	C1L3G3		HCD
M1_3_RB1_1_8834.d	DPATQPLVPVHNPVLN	F2:47978	16	89	89	16	855.968	1.1171-1.1334	50206	1709.91	6.8	D2EC27		HCD
M1_RB1_1_8657.d	KHESTLNS(+79.97)QEKKY	F3:8239	13	89	89	13	836.395	1.0865-1.1028	49401	1670.77	5.3		Phosphorylation (STY)	HCD
M1_2_RB1_1_8832.d	ATHRLTA	F1:18549	7	89	89	7	385.22	0.7417-0.7584	0	768.424	2.2			HCD
M1_2_RB1_1_8832.d	EVDKKL	F1:7394	6	89	89	6	731.434	1.2789-1.2951	0	730.423	5.9	A0A8C4LD25		HCD
M1_3_RB1_1_8834.d	ELSQVLK	F2:28131	7	89	89	7	408.746	0.7737-0.7903	1879.8	815.475	2.3	P28546:A0A8C4KWV0		HCD
M2-1_3_RB1_1_8839.d	ERLL	F5:27494	4	89	89	4	530.331	1.1076-1.1239	0	529.322	2.1			HCD
M1_RB1_1_8657.d	HESTNLS(+79.97)QEKY	F3:16740	11	89	89	11	708.297	1.0066-1.0230	111670	1414.58	1.8	B7VGF9:C1L3G3	Phosphorylation (STY)	HCD
M1_RB1_1_8657.d	SDQTVAVKE	F3:13210	9	89	89	9	488.75	0.8145-0.8311	307.62	975.487	-1.5			HCD
M2-1_3_RB1_1_8839.d	TPWDQ	F5:19469	5	89	89	5	646.282	1.1497-1.1660	0	645.276	-1.5			HCD
M2-1_RB1_1_8659.d	DN(+.98)N(+.98)LSSCC	F6:9121	8	89	89	8	429.138	0.7598-0.7764	6567	856.258	3.4		Deamidation (NQ)	HCD
M1_3_RB1_1_8834.d	GPFPLL	F2:57478	6	89	89	6	643.382	1.1938-1.2100	0	642.374	0.7	A0A8C4MFK7:A0A8C4MBF6		HCD
M1_2_RB1_1_8832.d	ETDKPKV	F1:6585	7	89	89	7	408.729	0.7487-0.7653	510.44	815.439	5.9	A0A8C4L5P6		HCD
M1_RB1_1_8657.d	LLPTQ	F3:22740	5	89	89	5	571.347	1.1422-1.1585	0	570.338	3.7			HCD
M1_RB1_1_8657.d	LLKPKR	F3:12036	6	89	89	6	377.767	0.8042-0.8208	0	753.523	-4	A0A8C4N0C1:A0A8C4M1Y3:A0A8C4M2V3:A0A8C4M099:A0A8C4M5N7:A0A8C4LZT9		HCD
M1_2_RB1_1_8832.d	APPKVRP	F1:9793	7	89	89	7	382.745	0.8166-0.8332	965.09	763.47	6.8			HCD
M2-1_3_RB1_1_8839.d	A(+42.01)STGPTK	F5:4249	7	89	89	7	703.363	1.2425-1.2587	0	702.355	1.1		Acetylation (N-term)	HCD
M2-1_3_RB1_1_8839.d	DAAQRGPGGAWA	F5:20405	12	89	89	12	578.779	0.8629-0.8795	2533.5	1155.54	1.4	A0A8C4LEB1		HCD
M1_2_RB1_1_8832.d	EDQ(+.98)GLPEKLVL	F1:52939	11	89	89	11	621.336	0.9098-0.9263	413.04	1240.65	1.6	A0A8C4M4P4:A0A8C4LWJ6	Deamidation (NQ)	HCD
M1_2_RB1_1_8832.d	GNLEYK	F1:11384	6	89	89	6	723.371	1.2668-1.2830	0	722.36	6			HCD
M1_2_RB1_1_8832.d	LNLERNHLYLL	F1:33022	11	89	89	11	466.603	0.7431-0.7598	0	1396.78	2.6			HCD
M1_3_RB1_1_8834.d	TLTGVHM(+15.99)	F2:11854	7	89	89	7	387.695	0.7348-0.7515	2430.9	773.374	0.5		Oxidation (M)	HCD
M1_3_RB1_1_8834.d	LTGEFD	F2:27214	6	89	89	6	681.312	1.1931-1.2094	0	680.302	4.4	D2EC27		HCD
M1_2_RB1_1_8832.d	A(+42.01)STGPTK	F1:5997	7	89	89	7	703.367	1.2337-1.2499	0	702.355	6.7		Acetylation (N-term)	HCD
M1_3_RB1_1_8834.d	YLKQLETRHH	F2:10230	10	89	89	10	442.239	0.7431-0.7598	677.1	1323.7	-6.7	A0A8C4M686:A0A8C4MBZ9:A0A8C4MBY1		HCD
M1_2_RB1_1_8832.d	EPQLAL	F1:45416	6	89	89	6	670.377	1.2100-1.2263	0	669.37	0.4	A0A8C4MSR3		HCD
M2-1_3_RB1_1_8839.d	ENAQRLTDRF	F5:20603	10	89	89	10	417.216	0.7216-0.7383	0	1248.62	3.6			HCD
M1_RB1_1_8657.d	SPLPN(+.98)LFPADFK	F3:56078	12	89	89	12	673.855	0.9462-0.9627	11562	1345.69	2.7	A0A8C4LDF2:A0A8C4LHM4:A0A8C4LGD8	Deamidation (NQ)	HCD
M1_RB1_1_8657.d	LVHQHQTTM(+15.99)DQPSHKVLL	F3:19895	18	89	89	18	710.039	0.9922-1.0086	4372	2127.09	2.7	B7VGF9	Oxidation (M)	HCD
M1_3_RB1_1_8834.d	EDNTPLVKL	F2:44662	9	89	89	9	514.787	0.8401-0.8567	175.48	1027.55	3.7	A0A8C4LDF2:A0A8C4LHM4:A0A8C4LGD8		HCD
M1_3_RB1_1_8834.d	DAYHMP	F2:17113	6	89	89	6	733.299	1.2675-1.2837	0	732.29	2.9			HCD
M1_2_RB1_1_8832.d	LDSKEL	F1:27918	6	89	89	6	704.385	1.2297-1.2459	0	703.375	3.5			HCD
M1_2_RB1_1_8832.d	DENGKLSRL	F1:17406	9	89	89	9	516.276	0.8477-0.8643	53.131	1030.54	-3.5	A0A8C4PFC6		HCD
M1_RB1_1_8657.d	LN(+.98)EVRR	F3:11532	6	89	89	6	394.225	0.7702-0.7868	6882.8	786.435	1.8		Deamidation (NQ)	HCD
M2-1_RB1_1_8659.d	PKDQTEEEKKKP	F6:840	12	89	89	12	486.261	0.7681-0.7848	1957.9	1455.76	2.1	A0A8C4PJP9:A0A8C4LGI0:A0A8C4LH82:A0A8C4L2U4:A0A8C4M2F8:A0A8C4PP55:A0A8C4LYI3:A0A8C4M135:A0A8C4M712:A0A8C4L946:A0A8C4LA58:A0A8C4L2G1:A0A8C4L6W9:A0A8C4M6N0:A0A8C4PQ06:A0A8C4M9C8:A0A8C4M5V6:A0A650BPW2:A0A8C4M3K2:A0A8C4M1Q2:A0A8C4N1R3:A0A8C4N0Z5:A0A8C4N0L6:A0A8C4MP87:A0A8C4MZ99		HCD
M1_RB1_1_8657.d	LPEKPE	F3:11609	6	89	89	6	712.384	1.2594-1.2756	0	711.38	-5.3	A0A8C4LD23		HCD
M1_RB1_1_8657.d	FPADF	F3:47189	5	89	89	5	596.274	1.1592-1.1755	0	595.264	4.9			HCD
M1_3_RB1_1_8834.d	LPRKL	F2:16559	5	89	89	5	313.722	0.7042-0.7209	3366.7	625.428	3.3			HCD
M2-1_3_RB1_1_8839.d	DMPLQA	F5:25259	6	89	89	6	674.314	1.1891-1.2053	0	673.311	-5.4			HCD
M1_3_RB1_1_8834.d	YLGADKYF	F2:40509	8	89	89	8	488.743	0.8263-0.8429	379.58	975.47	1	A0A8C4LEB1:A0A8C4MGQ5		HCD
M1_3_RB1_1_8834.d	QVQSGVN(+.98)MTKSVVTS	F2:36689	15	89	89	15	783.397	1.0592-1.0756	615.06	1564.78	2.2	A0A8C4LEF6	Deamidation (NQ)	HCD
M1_2_RB1_1_8832.d	QGVDQKLVEGQEKLH	F1:24067	15	89	89	15	569.976	0.8739-0.8905	1047	1706.89	6.5	P0DUB1:A0A8C4L7D7:A0A8C4PHR9:A0A8C4MEI5:A0A8C4MEJ9:A0A8C4M6Y4:A0A8C4M530		HCD
M2-1_3_RB1_1_8839.d	MPFLK	F5:27042	5	89	89	5	635.359	1.1965-1.2128	0	634.351	0.9			HCD
M1_2_RB1_1_8832.d	APPPSVVT	F1:25640	8	89	89	8	767.43	1.2816-1.2978	0	766.423	0.5	A0A8C4M2H8		HCD
M1_2_RB1_1_8832.d	ETLLPK	F1:26615	6	89	89	6	700.427	1.1945-1.2107	0	699.417	3.6	D2EC27		HCD
M1_3_RB1_1_8834.d	DKYF	F2:23009	4	89	89	4	572.274	1.1021-1.1185	0	571.264	5.4			HCD
M2-1_3_RB1_1_8839.d	ESTNLYYKYK	F5:11044	10	89	89	10	654.829	0.9469-0.9634	1005.8	1307.64	3.4			HCD
M2-1_2_RB1_1_8837.d	EELEQRL	F4:27714	7	89	89	7	458.741	0.8194-0.8360	0	915.466	0.5	A0A8C4MAK5:A0A8C4LCR7:A0A8C4LIJ3		HCD
M1_RB1_1_8657.d	LPLLD	F3:47349	5	89	89	5	570.353	1.1572-1.1735	0	569.342	6.1			HCD
M1_2_RB1_1_8832.d	SPLPDLFPGEKF	F1:57631	12	89	89	12	673.856	0.9798-0.9963	105660	1345.69	4.7	A0A8C4L6A6		HCD
M2-1_3_RB1_1_8839.d	EKPPP	F5:4857	5	89	89	5	567.315	1.0803-1.0967	0	566.306	3.1			HCD
M1_2_RB1_1_8832.d	LPLP	F1:45612	4	89	89	4	439.291	1.0059-1.0223	0	438.284	0			HCD
M1_RB1_1_8657.d	EPVKKL	F3:8026	6	89	89	6	713.458	1.2567-1.2729	0	712.448	4	A0A8C4MAC7:A0A8C4PQV7:A0A8C4MHP1:A0A8C4MKT7:A0A8C4MCS3		HCD
M2-1_RB1_1_8659.d	DLSKPLT	F6:17860	7	89	89	7	387.226	0.7612-0.7778	120.07	772.433	6.5	A0A8C4KYU4:A0A8C4L2F7:A0A8C4L4R4:A0A8C4PSM4:A0A8C4MPT3:A0A8C4MK98		HCD
M1_RB1_1_8657.d	TVTPVTKL	F3:30703	8	89	89	8	429.767	0.7875-0.8042	1562	857.522	-2.7	A0A8C4LHK7		HCD
M1_2_RB1_1_8832.d	HSDAVSLDLKPDPSQK	F1:28901	16	89	89	16	579.635	0.8864-0.9029	1384.9	1735.87	5.8	A0A8C4LXL5:A0A8C4MLW6		HCD
M1_3_RB1_1_8834.d	WTKELVSSKVSG	F2:20593	12	89	89	12	660.861	0.9812-0.9977	294.61	1319.71	-0.8	A0A8C4LD25:A0A8C4MG23:A0A8C4PSY6:A0A8C4MMW0:A0A8C4M0T1		HCD
M2-1_RB1_1_8659.d	ETLLR	F6:14154	5	89	89	5	631.379	1.1918-1.2080	0	630.37	2.7			HCD
M2-1_3_RB1_1_8839.d	TDGVLKT	F5:12224	7	89	89	7	733.413	1.2715-1.2877	0	732.402	4.7			HCD
M1_2_RB1_1_8832.d	MELLKLEPK(+42.01)PLE	F1:14338	12	89	89	12	494.617	0.7744-0.7910	0	1480.82	6.1	A0A8C4LF94	Acetylation (K)	HCD
M2-1_3_RB1_1_8839.d	ELLKEK	F5:7615	6	89	89	6	759.461	1.2810-1.2971	0	758.454	-0.3	P86272:C3W972:A0A8C4M6N0:A0A8C4PQ06:A0A8C4M9C8:A0A8C4M5V6:A0A8C4N1R3:A0A8C4N0Z5:A0A8C4N0L6:A0A8C4MRJ8		HCD
M2-1_3_RB1_1_8839.d	HPHLF	F5:19145	5	89	89	5	650.343	1.2026-1.2188	0	649.334	3.2			HCD
M2-1_2_RB1_1_8837.d	LPKKTV	F4:3873	6	89	89	6	343.235	0.7077-0.7244	4744.2	684.453	3	B7VGF9		HCD
M2-1_RB1_1_8659.d	DTVKKL	F6:6124	6	89	89	6	352.221	0.7237-0.7403	4788.6	702.428	-1.2	A0A8C4L1V5:A0A8C4L4B8:A0A8C4LYI3:A0A8C4M135:A0A8C4M712		HCD
M1_RB1_1_8657.d	LPPEERLL	F3:40428	8	89	89	8	483.784	0.8367-0.8532	5198.3	965.554	-0.4			HCD
M1_3_RB1_1_8834.d	VPNETLLPKRKV	F2:21393	12	89	89	12	697.431	1.0243-1.0407	3979.4	1392.85	1.7	D2EC27:A0A8C4L9N3		HCD
M1_RB1_1_8657.d	DLLKRH	F3:6568	6	89	89	6	391.238	0.7737-0.7903	881.19	780.461	0	A0A8C4LHU7		HCD
M2-1_2_RB1_1_8837.d	HESTNLS(+79.97)QEKY	F4:13300	11	89	89	11	708.298	0.9812-0.9977	268430	1414.58	3.7	B7VGF9:C1L3G3	Phosphorylation (STY)	HCD
M2-1_2_RB1_1_8837.d	HAVPDELVKKL	F4:30083	11	89	89	11	624.865	0.9318-0.9483	131.06	1247.72	-5.7	A0A8C4L2U4:A0A8C4L9Z3:A0A8C4LBK0:A0A8C4LEL1:A0A8C4LGW5:A0A8C4LB42:A0A8C4LJD7:A0A8C4LKU6		HCD
M1_2_RB1_1_8832.d	HAVVPYPQRDTPVQA	F1:46992	15	89	89	15	839.44	1.0694-1.0858	38293	1676.86	1.2	D2EC27		HCD
M2-1_3_RB1_1_8839.d	LPDLT	F5:25881	5	89	89	5	558.315	1.0899-1.1062	0	557.306	3.7			HCD
M2-1_RB1_1_8659.d	TPWDQTK	F6:15198	7	89	89	7	438.217	0.8007-0.8173	4235.5	874.418	1.3	B7VGF9		HCD
M1_3_RB1_1_8834.d	SPLRPPK	F2:10812	7	88	88	7	397.749	0.7702-0.7868	1602.3	793.481	2.2	A0A8C4KZN3:A0A8C4L2D4		HCD
M2-1_2_RB1_1_8837.d	VCEDLK	F4:14445	6	88	88	6	706.341	1.2351-1.2513	0	705.337	-3.8			HCD
M2-1_RB1_1_8659.d	HESTNLS(+79.97)QEKY	F6:13369	11	88	88	11	708.296	0.9723-0.9887	309480	1414.58	0.8	B7VGF9:C1L3G3	Phosphorylation (STY)	HCD
M2-1_3_RB1_1_8839.d	HESTNLS(+79.97)QEKYK	F5:8871	12	88	88	12	772.345	1.0278-1.0442	390870	1542.67	2.2	B7VGF9:C1L3G3:A0A8C4MHP1:A0A8C4MKT7:A0A8C4MCS3	Phosphorylation (STY)	HCD
M1_RB1_1_8657.d	LHWSEVEHQDKL	F3:14496	12	88	88	12	507.586	0.7931-0.8097	2975.1	1519.74	-3.3	D2EC27		HCD
M2-1_3_RB1_1_8839.d	EEAERLE	F5:9024	7	88	88	7	438.21	0.7799-0.7965	275.4	874.403	2.1	A0A8C4MTS8:A0A8C4LUM8:A0A8C4PKI3:A0A8C4PSK5		HCD
M1_RB1_1_8657.d	PRPPNPGALAPLPR	F3:33885	14	88	88	14	484.952	0.8055-0.8221	9472.4	1451.84	-1.9	A0A8C4N3Z1		HCD
M2-1_RB1_1_8659.d	EN(+.98)GDLKRL	F6:13193	8	88	88	8	473.255	0.8097-0.8263	278.61	944.493	3.4	A0A8C4M3J6	Deamidation (NQ)	HCD
M2-1_RB1_1_8659.d	ADTKELVS	F6:12612	8	88	88	8	431.729	0.8000-0.8166	466.25	861.444	0			HCD
M2-1_RB1_1_8659.d	A(+42.01)EEVEEERLK	F6:22247	10	88	88	10	637.317	0.9538-0.9702	1330.8	1272.62	-0.8	A0A8C4L5S0:A0A8C4MQZ7:A0A8C4M487:A0A8C4M0J3	Acetylation (N-term)	HCD
M1_2_RB1_1_8832.d	QPLLPVRG	F1:36932	8	88	88	8	440.274	0.8263-0.8429	3672.4	878.534	-0.4			HCD
M1_3_RB1_1_8834.d	KHESTNLS(+79.97)QEKYK	F2:8330	13	88	88	13	836.395	1.0762-1.0926	35311	1670.77	5.2	B7VGF9:C1L3G3:A0A8C4MHP1:A0A8C4MKT7:A0A8C4MCS3	Phosphorylation (STY)	HCD
M1_2_RB1_1_8832.d	YFKALKEKQKDEHRTY	F1:15505	16	88	88	16	521.776	0.8201-0.8367	5164.3	2083.09	-4	P86272:C3W972:A0A8C4MB72:A0A8C4LEX0:A0A8C4M6N0:A0A8C4PQ06:A0A8C4M9C8:A0A8C4M5V6:A0A8C4N0G9:A0A8C4N115:A0A8C4MZ04:A0A8C4MBW3:A0A8C4MFI5:A0A8C4MN77:A0A8C4MLN5:A0A8C4MLC7:A0A8C4MKX0:A0A8C4M686:A0A8C4MBZ9:A0A8C4MBY1:A0A8C4L602:A0A8C4L3K5:A0A8C4PSY6:A0A8C4MMW0		HCD
M2-1_3_RB1_1_8839.d	LLEQ(+.98)LK	F5:23925	6	88	88	6	372.729	0.7737-0.7903	299.91	743.443	0	A0A8C4MGS3:A0A8C4KXU0:A0A8C4MAG6:A0A8C4M250:A0A8C4LFA4:A0A8C4LJQ2:A0A8C4LFL1:A0A8C4MEN5:A0A8C4MHT5	Deamidation (NQ)	HCD
M2-1_RB1_1_8659.d	LLEELKWK	F6:28343	8	88	88	8	529.816	0.8953-0.9118	139.77	1057.62	0.1	A0A8C4PJR0:A0A8C4KUH1:A0A8C4KVX9		HCD
M2-1_RB1_1_8659.d	NEDPLTKT	F6:11808	8	88	88	8	459.233	0.7910-0.8076	9242.7	916.45	2.4	A0A8C4KZN3:A0A8C4L2D4		HCD
M1_3_RB1_1_8834.d	DKKAAGAGKVTKS	F2:1983	13	88	88	13	630.863	0.9222-0.9387	0	1259.72	-6	A0A8C4L5X9:A0A8C4L6K5:A0A8C4PJP9:A0A8C4LGI0:A0A8C4LH82:A0A8C4M6C3:A0A8C4M350:A0A8C4L7B3		HCD
M1_RB1_1_8657.d	SKLLPTQ	F3:24288	7	88	88	7	393.738	0.7508-0.7674	4622.6	785.465	-3.1	A0A8C4LD23:A0A8C4ML69:A0A8C4PQX9:A0A8C4MA26:A0A8C4MDS9		HCD
M1_2_RB1_1_8832.d	LPPKKL	F1:12144	6	88	88	6	348.246	0.7397-0.7563	4016.9	694.474	4.6	F0V6V5:A0A8C4L1U5:A0A8C4M5X6		HCD
M2-1_3_RB1_1_8839.d	LDVKKL	F5:8146	6	88	88	6	358.239	0.7348-0.7515	0	714.464	0.4			HCD
M1_2_RB1_1_8832.d	LPQEV	F1:25827	5	88	88	5	585.324	1.1518-1.1680	0	584.317	0.4			HCD
M1_2_RB1_1_8832.d	MADQ(+.98)ASGKAD	F1:4771	10	88	88	10	497.713	0.7993-0.8159	684.42	993.407	4.4		Deamidation (NQ)	HCD
M1_3_RB1_1_8834.d	VDPRKV	F2:7112	6	88	88	6	357.219	0.7132-0.7299	3658.1	712.423	0.5			HCD
M1_RB1_1_8657.d	EEKVQKF	F3:11469	7	88	88	7	454.248	0.7979-0.8145	2105.6	906.481	0.6	D2EC27:A0A8C4KT44:A0A8C4MNE2:A0A8C4MD75:A0A8C4PRJ1:A0A8C4MEB5:A0A8C4MCX6:A0A8C4PRX7		HCD
M1_RB1_1_8657.d	KHESTNLS(+79.97)QEKYK	F3:8294	13	88	88	13	836.395	1.0871-1.1035	49401	1670.77	5.3	B7VGF9:C1L3G3:A0A8C4MHP1:A0A8C4MKT7:A0A8C4MCS3	Phosphorylation (STY)	HCD
M2-1_RB1_1_8659.d	PPPPYK	F6:25389	6	88	88	6	698.387	1.2594-1.2756	0	697.38	-0.6			HCD
M1_2_RB1_1_8832.d	DPQSHKV	F1:3287	7	88	88	7	405.71	0.7438-0.7605	0	809.403	3.1			HCD
M1_3_RB1_1_8834.d	DPPLKL	F2:39136	6	88	88	6	682.415	1.2816-1.2978	0	681.406	2.4	A0A8C4L4V2		HCD
M1_RB1_1_8657.d	SQGAGHLQTR	F3:4945	10	88	88	10	527.773	0.8498-0.8664	1128	1053.53	0.4	A0A8C4MF50:A0A8C4MIB0:A0A8C4M7H9		HCD
M2-1_3_RB1_1_8839.d	LPEW	F5:28820	4	88	88	4	544.278	1.0708-1.0871	0	543.269	2.7			HCD
M1_RB1_1_8657.d	EPPKY	F3:15167	5	88	88	5	633.326	1.1599-1.1762	0	632.317	2			HCD
M2-1_RB1_1_8659.d	DGGRKL	F6:1205	6	88	88	6	323.188	0.7063-0.7230	8656	644.361	0.4	A0A8C4L771:A0A8C4L9J5:A0A8C4LEX8:A0A8C4LA01		HCD
[truncated: 32,651 more rows]

## Sheet: Table S11
Table S11. Identification of endogenous peptides by de novo in both TCA precipitation (M1) and ultrafiltration (M2) methods (ALC≥95%).
Source File	Peptide	Precursor Id	Tag Length	Denovo Score	ALC (%)	length	m/z	1/k0 Range	Area	Mass	ppm	Accession	PTM	mode
M2-1_RB1_1_8659.d	DPDTAHPHL	F6:15026	9	99	99	9	501.737	0.8643-0.8808	3608.7	1001.46	3.1	A0A8C4LD23		HCD
M1_RB1_1_8657.d	LELTKEEKLYLK	F3:34740	12	99	99	12	753.942	1.0865-1.1028	966.06	1505.87	-0.3	A0A8C4M7I4:A0A8C4LTE2:A0A8C4M6N0:A0A8C4PQ06:A0A8C4M9C8:A0A8C4M5V6:A0A8C4MQW4:A0A8C4PU43		HCD
M2-1_RB1_1_8659.d	DPDTAHPHL	F6:14913	9	99	99	9	501.737	0.8636-0.8802	3608.7	1001.46	3.1	A0A8C4LD23		HCD
M1_3_RB1_1_8834.d	HESTNLSQEKYK	F2:8789	12	99	99	12	732.364	1.0134-1.0298	9395.7	1462.71	5.2	B7VGF9:C1L3G3:A0A8C4MHP1:A0A8C4MKT7:A0A8C4MCS3		HCD
M1_2_RB1_1_8832.d	HESTNLSQEKYK	F1:8821	12	99	99	12	732.364	1.0141-1.0305	9610.9	1462.71	5.3	B7VGF9:C1L3G3:A0A8C4MHP1:A0A8C4MKT7:A0A8C4MCS3		HCD
M1_RB1_1_8657.d	HESTNLSQEKYK	F3:8763	12	99	99	12	732.362	1.0237-1.0401	9424.3	1462.71	3.1	B7VGF9:C1L3G3:A0A8C4MHP1:A0A8C4MKT7:A0A8C4MCS3		HCD
M1_3_RB1_1_8834.d	HESTNLSQEKYK	F2:8743	12	99	99	12	732.364	1.0107-1.0271	9395.7	1462.71	5.2	B7VGF9:C1L3G3:A0A8C4MHP1:A0A8C4MKT7:A0A8C4MCS3		HCD
M2-1_2_RB1_1_8837.d	KHESTNLSQEKYK	F4:4336	13	99	99	13	531.277	0.8097-0.8263	8607.6	1590.8	5.8	B7VGF9:C1L3G3:A0A8C4MHP1:A0A8C4MKT7:A0A8C4MCS3		HCD
M1_2_RB1_1_8832.d	SPLPN(+.98)LFPADFK	F1:57113	12	99	99	12	673.856	0.9634-0.9798	105660	1345.69	4.7	A0A8C4LDF2:A0A8C4LHM4:A0A8C4LGD8	Deamidation (NQ)	HCD
M1_2_RB1_1_8832.d	HESTNLSQEKYK	F1:8811	12	99	99	12	732.364	1.0113-1.0278	9610.9	1462.71	5.3	B7VGF9:C1L3G3:A0A8C4MHP1:A0A8C4MKT7:A0A8C4MCS3		HCD
M1_RB1_1_8657.d	DPQSHKVLL	F3:26286	9	99	99	9	518.795	0.8843-0.9008	3287.4	1035.57	3.9	A0A8C4MBA7		HCD
M1_RB1_1_8657.d	VKLSEADKKKV	F3:4420	11	99	99	11	415.588	0.7390-0.7556	412.83	1243.75	-5.4	A0A8C4M816		HCD
M1_3_RB1_1_8834.d	PNHFRPR	F2:5058	7	99	99	7	462.253	0.7917-0.8083	0	922.489	2.4	A0A8C4LEB1		HCD
M2-1_RB1_1_8659.d	HESTNLSQEKYK	F6:6276	12	99	99	12	732.363	1.0243-1.0407	10238	1462.71	4.5	B7VGF9:C1L3G3:A0A8C4MHP1:A0A8C4MKT7:A0A8C4MCS3		HCD
M1_3_RB1_1_8834.d	SPLPN(+.98)LFPADFK	F2:57116	12	99	99	12	673.856	0.9647-0.9812	116350	1345.69	4.4	A0A8C4LDF2:A0A8C4LHM4:A0A8C4LGD8	Deamidation (NQ)	HCD
M1_RB1_1_8657.d	LETKEEKLYL	F3:36957	10	99	99	10	633.355	0.9901-1.0066	4538.9	1264.69	2.9	A0A8C4M7I4		HCD
M1_2_RB1_1_8832.d	ELTKEEKLYLK	F1:25345	11	99	99	11	465.271	0.8007-0.8173	8070.7	1392.79	3.4	A0A8C4M7I4:A0A8C4LTE2:A0A8C4MQW4:A0A8C4PU43		HCD
M1_RB1_1_8657.d	HESTNLSQEKY	F3:13740	11	99	99	11	668.313	0.9531-0.9696	12564	1334.61	1.4	B7VGF9:C1L3G3		HCD
M1_RB1_1_8657.d	ELTKEEKLYLK	F3:25303	11	99	99	11	465.27	0.8097-0.8263	8621.2	1392.79	0.7	A0A8C4M7I4:A0A8C4LTE2:A0A8C4MQW4:A0A8C4PU43		HCD
M1_2_RB1_1_8832.d	DPQSHKVLL	F1:26442	9	99	99	9	518.795	0.8712-0.8877	1490.1	1035.57	4.8	A0A8C4MBA7		HCD
M1_3_RB1_1_8834.d	SPLPN(+.98)LFPADFK	F2:57059	12	99	99	12	673.856	0.9874-1.0038	116350	1345.69	4.4	A0A8C4LDF2:A0A8C4LHM4:A0A8C4LGD8	Deamidation (NQ)	HCD
M1_2_RB1_1_8832.d	LPVHLL	F1:47716	6	98	98	6	346.231	0.7459-0.7626	5156.6	690.443	5.8	D2EC27		HCD
M2-1_2_RB1_1_8837.d	HESTNLSQEKYK	F4:6235	12	98	98	12	732.36	1.0113-1.0278	11129	1462.71	0.4	B7VGF9:C1L3G3:A0A8C4MHP1:A0A8C4MKT7:A0A8C4MCS3		HCD
M2-1_RB1_1_8659.d	DDDKLCKTKKL	F6:2013	11	98	98	11	436.237	0.7376-0.7542	6937.3	1305.7	-6.3	A0A8C4PN19		HCD
M1_2_RB1_1_8832.d	LETKEEKLYL	F1:37470	10	98	98	10	633.356	0.9764-0.9929	4352.5	1264.69	4.5	A0A8C4M7I4		HCD
M1_RB1_1_8657.d	ELTKEEKLY	F3:23390	9	98	98	9	576.813	0.9586-0.9750	6361.4	1151.61	4.4	A0A8C4M7I4:A0A8C4LTE2		HCD
M2-1_3_RB1_1_8839.d	HESTNLSQEKYK	F5:6314	12	98	98	12	732.361	1.0134-1.0298	11020	1462.71	2.2	B7VGF9:C1L3G3:A0A8C4MHP1:A0A8C4MKT7:A0A8C4MCS3		HCD
M1_RB1_1_8657.d	LQ(+.98)LTKEEKLYKL	F3:34680	12	98	98	12	502.963	0.8208-0.8374	7004.5	1505.87	-2.2	A0A8C4M7I4:A0A8C4LTE2:A0A8C4LBN5	Deamidation (NQ)	HCD
M1_RB1_1_8657.d	M(+42.01)ERAETLLR	F3:43204	9	98	98	9	580.809	0.9524-0.9689	7925.5	1159.6	1.5		Acetylation (N-term)	HCD
M1_2_RB1_1_8832.d	LETKEEKLYL	F1:37508	10	98	98	10	633.356	0.9778-0.9942	4352.5	1264.69	4.5	A0A8C4M7I4		HCD
M1_2_RB1_1_8832.d	PNHFRPR	F1:5072	7	98	98	7	462.254	0.8111-0.8277	2323.7	922.489	5.5	A0A8C4LEB1		HCD
M1_3_RB1_1_8834.d	LELTKEEKLYLK	F2:35270	12	98	98	12	753.947	1.0701-1.0865	964.56	1505.87	5.4	A0A8C4M7I4:A0A8C4LTE2:A0A8C4M6N0:A0A8C4PQ06:A0A8C4M9C8:A0A8C4M5V6:A0A8C4MQW4:A0A8C4PU43		HCD
M1_RB1_1_8657.d	SPLPN(+.98)LFPADFK	F3:56130	12	98	98	12	673.854	0.9737-0.9901	99611	1345.69	1.6	A0A8C4LDF2:A0A8C4LHM4:A0A8C4LGD8	Deamidation (NQ)	HCD
M1_2_RB1_1_8832.d	SPLPN(+.98)LFPADFK	F1:57058	12	98	98	12	673.856	0.9860-1.0024	105660	1345.69	4.7	A0A8C4LDF2:A0A8C4LHM4:A0A8C4LGD8	Deamidation (NQ)	HCD
M1_RB1_1_8657.d	SPLPN(+.98)LFPADFK	F3:56070	12	98	98	12	673.857	0.9977-1.0141	43507	1345.69	6.5	A0A8C4LDF2:A0A8C4LHM4:A0A8C4LGD8	Deamidation (NQ)	HCD
M1_3_RB1_1_8834.d	EANYLGADKYFHA	F2:39079	13	98	98	13	749.856	1.0175-1.0339	7409.9	1497.69	5.2	A0A8C4LEB1:A0A8C4MGQ5		HCD
M1_RB1_1_8657.d	DPNHFRPR	F3:8692	8	98	98	8	519.767	0.8684-0.8850	23882	1037.52	4.2	A0A8C4LEB1		HCD
M1_3_RB1_1_8834.d	PNHFRPR	F2:5049	7	98	98	7	462.254	0.8111-0.8277	2943.6	922.489	5.9	A0A8C4LEB1		HCD
M1_2_RB1_1_8832.d	EANYLGADKYFHA	F1:39251	13	98	98	13	749.855	1.0182-1.0346	8200.1	1497.69	4.7	A0A8C4LEB1:A0A8C4MGQ5		HCD
M1_2_RB1_1_8832.d	ELTKEEKLY	F1:23589	9	98	98	9	576.812	0.9503-0.9668	7992.7	1151.61	1.1	A0A8C4M7I4:A0A8C4LTE2		HCD
M1_RB1_1_8657.d	DPQSHKVLL	F3:26213	9	98	98	9	518.795	0.8898-0.9063	3287.4	1035.57	3.9	A0A8C4MBA7		HCD
M1_RB1_1_8657.d	HESTNLSQEKY	F3:13662	11	98	98	11	668.313	0.9517-0.9682	12564	1334.61	1.4	B7VGF9:C1L3G3		HCD
M1_RB1_1_8657.d	EANYLGADKYFHA	F3:38523	13	98	98	13	749.852	1.0284-1.0448	7806	1497.69	0.2	A0A8C4LEB1:A0A8C4MGQ5		HCD
M2-1_2_RB1_1_8837.d	LETKEEKLYL	F4:26482	10	98	98	10	633.356	0.9696-0.9860	4285.1	1264.69	4	A0A8C4M7I4		HCD
M1_3_RB1_1_8834.d	MADQ(+.98)AGSKADPED	F2:10866	13	98	98	13	668.275	0.9201-0.9366	3063.8	1334.53	3.9		Deamidation (NQ)	HCD
M2-1_2_RB1_1_8837.d	DPQSHKVLL	F4:20690	9	98	98	9	518.794	0.8574-0.8739	3868.2	1035.57	1.9	A0A8C4MBA7		HCD
M1_3_RB1_1_8834.d	KHESTNLSQEKYK	F2:6780	13	98	98	13	531.275	0.8049-0.8215	5271.7	1590.8	2.6	B7VGF9:C1L3G3:A0A8C4MHP1:A0A8C4MKT7:A0A8C4MCS3		HCD
M2-1_2_RB1_1_8837.d	EEKLYLK	F4:16548	7	98	98	7	461.769	0.8221-0.8387	8546.2	921.517	5.7	A0A8C4MQW4:A0A8C4PU43		HCD
M1_2_RB1_1_8832.d	WKKATLH	F1:8774	7	98	98	7	442.262	0.7855-0.8021	1474.1	882.508	3	A0A8C4LSV0		HCD
M1_3_RB1_1_8834.d	HESTNLSQEYK	F2:13684	11	98	98	11	668.315	0.9448-0.9613	13617	1334.61	4.5	C1L3G3		HCD
M1_3_RB1_1_8834.d	DPQSHKVL	F2:12429	8	98	98	8	462.253	0.7792-0.7958	1876.7	922.487	3.7	A0A8C4MBA7		HCD
M1_RB1_1_8657.d	DTFSSKEKLLEELK	F3:42044	14	98	98	14	556.299	0.8450-0.8615	564.91	1665.88	-3.8	A0A8C4LD23:A0A8C4MGS3:A0A8C4PJR0:A0A8C4M524:A0A8C4MDU2:A0A8C4KUH1:A0A8C4KVX9		HCD
M2-1_RB1_1_8659.d	DPQSHKVLL	F6:20421	9	98	98	9	518.794	0.8643-0.8808	4353.7	1035.57	2.5	A0A8C4MBA7		HCD
M2-1_2_RB1_1_8837.d	ELTKEEKLYLK	F4:20116	11	98	98	11	465.271	0.7875-0.8042	8523.2	1392.79	2.3	A0A8C4M7I4:A0A8C4LTE2:A0A8C4MQW4:A0A8C4PU43		HCD
M1_3_RB1_1_8834.d	LQ(+.98)LTKEEKLYKL	F2:35264	12	98	98	12	502.965	0.8125-0.8291	6860.9	1505.87	2	A0A8C4M7I4:A0A8C4LTE2:A0A8C4LBN5	Deamidation (NQ)	HCD
M1_RB1_1_8657.d	PPPPPP	F3:16121	6	98	98	6	601.332	1.1565-1.1728	0	600.327	-3.5	A0A8C4MTS8:A0A8C4LUM8:A0A8C4KXX4:A0A8C4M9E1:A0A8C4M3B4:A0A8C4LMY3:A0A8C4LNL1:A0A8C4LAX9:A0A8C4L5S0:A0A8C4LV13:A0A8C4LX24:A0A8C4LYB5:A0A8C4MZE5:A0A8C4LIZ6:A0A8C4LIA5:A0A8C4MVP1:A0A8C4MF50:A0A8C4MIB0:A0A8C4M7H9:A0A8C4MP75:A0A8C4L1M4:A0A8C4L0M4:A0A8C4MG23:A0A8C4MAY6:A0A8C4LUX7:A0A8C4NB56:A0A8C4MTY2:A0A8C4N2U9:A0A8C4LIL0:A0A8C4LI36:A0A8C4LI35:A0A8C4MLD5:A0A8C4MJU3:A0A8C4MMK2:A0A8C4PSM7:A0A8C4MLT9:A0A…		HCD
M1_2_RB1_1_8832.d	SPLPN(+.98)LFPADFK	F1:57082	12	98	98	12	673.855	0.9345-0.9510	13983	1345.69	2.2	A0A8C4LDF2:A0A8C4LHM4:A0A8C4LGD8	Deamidation (NQ)	HCD
M2-1_RB1_1_8659.d	ELTKEEKLYLK	F6:19947	11	98	98	11	697.403	1.0141-1.0305	2712.8	1392.79	3.3	A0A8C4M7I4:A0A8C4LTE2:A0A8C4MQW4:A0A8C4PU43		HCD
M1_2_RB1_1_8832.d	N(+.98)PVLRKL	F1:25384	7	98	98	7	420.772	0.7903-0.8069	1367.8	839.523	6.8	A0A8C4MK65	Deamidation (NQ)	HCD
M1_2_RB1_1_8832.d	HESTNLSQEKY	F1:13888	11	98	98	11	668.316	0.9421-0.9586	13408	1334.61	5.7	B7VGF9:C1L3G3		HCD
M1_2_RB1_1_8832.d	HESTNLSQEKY	F1:13752	11	98	98	11	668.316	0.9435-0.9599	13408	1334.61	5.7	B7VGF9:C1L3G3		HCD
M1_RB1_1_8657.d	KHESTNLSQEKYK	F3:6637	13	98	98	13	796.409	1.0605-1.0769	4122.1	1590.8	2.6	B7VGF9:C1L3G3:A0A8C4MHP1:A0A8C4MKT7:A0A8C4MCS3		HCD
M2-1_2_RB1_1_8837.d	ELTKEEKLY	F4:18604	9	98	98	9	576.813	0.9070-0.9235	34358	1151.61	3.3	A0A8C4M7I4:A0A8C4LTE2		HCD
M1_RB1_1_8657.d	PPPPPP	F3:17885	6	98	98	6	601.332	1.1429-1.1592	0	600.327	-3.5	A0A8C4MTS8:A0A8C4LUM8:A0A8C4KXX4:A0A8C4M9E1:A0A8C4M3B4:A0A8C4LMY3:A0A8C4LNL1:A0A8C4LAX9:A0A8C4L5S0:A0A8C4LV13:A0A8C4LX24:A0A8C4LYB5:A0A8C4MZE5:A0A8C4LIZ6:A0A8C4LIA5:A0A8C4MVP1:A0A8C4MF50:A0A8C4MIB0:A0A8C4M7H9:A0A8C4MP75:A0A8C4L1M4:A0A8C4L0M4:A0A8C4MG23:A0A8C4MAY6:A0A8C4LUX7:A0A8C4NB56:A0A8C4MTY2:A0A8C4N2U9:A0A8C4LIL0:A0A8C4LI36:A0A8C4LI35:A0A8C4MLD5:A0A8C4MJU3:A0A8C4MMK2:A0A8C4PSM7:A0A8C4MLT9:A0A…		HCD
M2-1_RB1_1_8659.d	KHESTNLSQEKYK	F6:4459	13	98	98	13	531.275	0.8152-0.8318	8110.4	1590.8	2.4	B7VGF9:C1L3G3:A0A8C4MHP1:A0A8C4MKT7:A0A8C4MCS3		HCD
M1_RB1_1_8657.d	SPLPDLFPADFK	F3:56048	12	98	98	12	673.857	0.9963-1.0127	43507	1345.69	6.5	A0A8C4L6A6		HCD
M1_2_RB1_1_8832.d	HESTNLSQEKY	F1:13774	11	98	98	11	668.316	0.9448-0.9613	13408	1334.61	5.7	B7VGF9:C1L3G3		HCD
M1_RB1_1_8657.d	ELTKEEKLYL	F3:36878	10	98	98	10	633.355	0.9881-1.0045	4538.9	1264.69	2.9	A0A8C4M7I4:A0A8C4LTE2		HCD
M1_RB1_1_8657.d	TPKKPKKA	F3:1426	8	98	98	8	449.299	0.7882-0.8049	3452.4	896.581	2.6	A0A8C4L7E5:A0A8C4LD74:A0A8C4PJP9:A0A8C4LGI0:A0A8C4LH82:A0A8C4KWP0:A0A8C4MPW1:A0A8C4MUI6		HCD
M1_2_RB1_1_8832.d	PPPPPP	F1:18037	6	98	98	6	601.335	1.1314-1.1477	0	600.327	1.6	A0A8C4MTS8:A0A8C4LUM8:A0A8C4KXX4:A0A8C4M9E1:A0A8C4M3B4:A0A8C4LMY3:A0A8C4LNL1:A0A8C4LAX9:A0A8C4L5S0:A0A8C4LV13:A0A8C4LX24:A0A8C4LYB5:A0A8C4MZE5:A0A8C4LIZ6:A0A8C4LIA5:A0A8C4MVP1:A0A8C4MF50:A0A8C4MIB0:A0A8C4M7H9:A0A8C4MP75:A0A8C4L1M4:A0A8C4L0M4:A0A8C4MG23:A0A8C4MAY6:A0A8C4LUX7:A0A8C4NB56:A0A8C4MTY2:A0A8C4N2U9:A0A8C4LIL0:A0A8C4LI36:A0A8C4LI35:A0A8C4MLD5:A0A8C4MJU3:A0A8C4MMK2:A0A8C4PSM7:A0A8C4MLT9:A0A…		HCD
M1_RB1_1_8657.d	LVHQHQTTMDPQSHKVLL	F3:25425	18	98	98	18	704.707	0.9627-0.9792	6114.5	2111.09	1.7	B7VGF9:A0A8C4MBA7		HCD
M2-1_RB1_1_8659.d	HESTNLSQEK	F6:3413	10	98	98	10	586.783	0.9001-0.9167	11585	1171.55	3.8	B7VGF9:C1L3G3		HCD
M2-1_2_RB1_1_8837.d	HESTNLSQEK	F4:3299	10	98	98	10	586.784	0.8953-0.9118	8894.5	1171.55	5.3	B7VGF9:C1L3G3		HCD
M1_3_RB1_1_8834.d	DPQSHKVLL	F2:26314	9	98	98	9	518.794	0.8808-0.8974	0	1035.57	2.7	A0A8C4MBA7		HCD
M1_RB1_1_8657.d	LQ(+.98)LTKEEKLYLK	F3:34785	12	98	98	12	502.963	0.8194-0.8360	7004.5	1505.87	-2.2	A0A8C4M7I4:A0A8C4LTE2:A0A8C4MQW4:A0A8C4PU43	Deamidation (NQ)	HCD
M1_3_RB1_1_8834.d	HESTNLSQEKY	F2:13745	11	98	98	11	668.315	0.9435-0.9599	13617	1334.61	4.5	B7VGF9:C1L3G3		HCD
M2-1_3_RB1_1_8839.d	ELTKEEKLY	F5:18692	9	98	98	9	576.813	0.9063-0.9228	34754	1151.61	3.5	A0A8C4M7I4:A0A8C4LTE2		HCD
M1_2_RB1_1_8832.d	M(+42.01)ERAQ(+.98)TLLR	F1:44156	9	98	98	9	580.812	0.9421-0.9586	7108.1	1159.6	6.1		Acetylation (N-term); Deamidation (NQ)	HCD
M2-1_3_RB1_1_8839.d	ELTKEEKLY	F5:18749	9	98	98	9	576.813	0.9077-0.9242	34754	1151.61	3.5	A0A8C4M7I4:A0A8C4LTE2		HCD
M2-1_RB1_1_8659.d	LETKEEKLYL	F6:26221	10	98	98	10	633.354	0.9771-0.9935	4200.3	1264.69	1.1	A0A8C4M7I4		HCD
M2-1_RB1_1_8659.d	DPQSHKVLL	F6:20470	9	98	98	9	518.794	0.8629-0.8795	4353.7	1035.57	2.5	A0A8C4MBA7		HCD
M1_RB1_1_8657.d	TPKKPK	F3:1384	6	98	98	6	349.73	0.7619-0.7785	1419.8	697.449	-4.3	A0A8C4MPW1:A0A8C4MUI6		HCD
M2-1_2_RB1_1_8837.d	ELTKEEKLYLK	F4:20072	11	98	98	11	465.271	0.7841-0.8007	8523.2	1392.79	2.3	A0A8C4M7I4:A0A8C4LTE2:A0A8C4MQW4:A0A8C4PU43		HCD
M1_3_RB1_1_8834.d	WKKATLH	F2:8739	7	98	98	7	442.264	0.7861-0.8028	1426.4	882.508	5.7	A0A8C4LSV0		HCD
M1_3_RB1_1_8834.d	KVM(+15.99)PFLK	F2:23157	7	98	98	7	439.763	0.8201-0.8367	915.72	877.51	1.4	D2EC27	Oxidation (M)	HCD
M2-1_RB1_1_8659.d	EEKLYLK	F6:16462	7	98	98	7	461.767	0.8304-0.8470	8042.6	921.517	2.6	A0A8C4MQW4:A0A8C4PU43		HCD
M1_3_RB1_1_8834.d	TPKKPK	F2:1430	6	98	98	6	349.732	0.7556-0.7723	1580.2	697.449	2.4	A0A8C4MPW1:A0A8C4MUI6		HCD
M1_3_RB1_1_8834.d	ELTKEEKLY	F2:23612	9	98	98	9	576.812	0.9503-0.9668	7174.3	1151.61	1.1	A0A8C4M7I4:A0A8C4LTE2		HCD
M1_3_RB1_1_8834.d	QEQ(+.98)KKKKKL	F2:1467	9	98	98	9	579.864	0.9036-0.9201	2145.6	1157.71	0.1	A0A8C4L1V5:A0A8C4L4B8:A0A8C4MD96:A0A8C4L5S0:A0A8C4LAH0:A0A8C4MZE5:A0A8C4MLY4:A0A8C4MMG4:A0A8C4MP75:A0A8C4MAC7:A0A8C4PQV7:A0A8C4MG23:A0A8C4MP98:A0A8C4LIL0:A0A8C4LI36:A0A8C4MLD5:A0A8C4MJU3:A0A8C4MMK2:A0A8C4PSM7:A0A8C4MLT9:A0A8C4PSM5:A0A8C4L946:A0A8C4LA58:A0A8C4L2G1:A0A8C4L6W9:A0A8C4KT44:A0A8C4MHA7:A0A8C4LC31:A0A8C4MGD3:A0A8C4LUP4:A0A8C4LX95:A0A8C4MEI5:A0A8C4MEJ9:A0A8C4M6Y4:A0A8C4M530:A0A8C4MEG2:A0A…	Deamidation (NQ)	HCD
M1_RB1_1_8657.d	NHFRPR	F3:3654	6	98	98	6	413.726	0.7868-0.8035	1662.3	825.436	1.9			HCD
M2-1_3_RB1_1_8839.d	ELTKEEKLYLK	F5:20207	11	98	98	11	465.27	0.7841-0.8007	8487	1392.79	1.6	A0A8C4M7I4:A0A8C4LTE2:A0A8C4MQW4:A0A8C4PU43		HCD
M1_2_RB1_1_8832.d	WPELE	F1:47649	5	98	98	5	673.321	1.1992-1.2155	0	672.312	3.1			HCD
M1_2_RB1_1_8832.d	KPSYYLR	F1:17204	7	98	98	7	463.76	0.8367-0.8532	324.86	925.502	3.3	A0A8C4MSR3		HCD
M2-1_2_RB1_1_8837.d	HESTNLSQEK	F4:3386	10	98	98	10	586.784	0.8891-0.9056	8894.5	1171.55	5.3	B7VGF9:C1L3G3		HCD
M2-1_RB1_1_8659.d	HESTNLSQEKY	F6:10878	11	98	98	11	668.316	0.9442-0.9606	16558	1334.61	4.6	B7VGF9:C1L3G3		HCD
M2-1_2_RB1_1_8837.d	DLDDKLLK	F4:20702	8	98	98	8	480.276	0.8381-0.8546	1284.5	958.533	3.9			HCD
M1_RB1_1_8657.d	LPVHLL	F3:46700	6	98	98	6	346.23	0.7529-0.7695	4885.8	690.443	3.6	D2EC27		HCD
M1_3_RB1_1_8834.d	LPDKY	F2:16547	5	98	98	5	635.34	1.1979-1.2141	0	634.333	0.7			HCD
M1_3_RB1_1_8834.d	DRLEQLK	F2:15686	7	97	97	7	451.261	0.8208-0.8374	701.54	900.503	5.4	A0A8C4MAK5		HCD
M1_RB1_1_8657.d	KKATLHAVDVT	F3:15493	11	97	97	11	591.847	0.9056-0.9222	2945.9	1181.68	2.1	A0A8C4LSV0		HCD
M1_2_RB1_1_8832.d	HESTNLSQEKY	F1:13786	11	97	97	11	668.316	0.9366-0.9531	13408	1334.61	5.7	B7VGF9:C1L3G3		HCD
M1_3_RB1_1_8834.d	ELTKEEKLYLK	F2:25340	11	97	97	11	465.272	0.7958-0.8125	7408.8	1392.79	4.9	A0A8C4M7I4:A0A8C4LTE2:A0A8C4MQW4:A0A8C4PU43		HCD
M2-1_RB1_1_8659.d	ELTKEEKLYL	F6:26253	10	97	97	10	633.354	0.9778-0.9942	4200.3	1264.69	1.1	A0A8C4M7I4:A0A8C4LTE2		HCD
M2-1_3_RB1_1_8839.d	DELVKKL	F5:18113	7	97	97	7	422.761	0.7660-0.7827	676.31	843.506	1	A0A8C4L9Z3:A0A8C4LBK0:A0A8C4LEL1:A0A8C4LGW5:A0A8C4LB42:A0A8C4LJD7:A0A8C4LKU6		HCD
M1_3_RB1_1_8834.d	DPNHFRPR	F2:8684	8	97	97	8	519.768	0.8574-0.8739	23663	1037.52	6.2	A0A8C4LEB1		HCD
M1_2_RB1_1_8832.d	PPPPPP	F1:18048	6	97	97	6	601.335	1.1429-1.1592	0	600.327	1.6	A0A8C4MTS8:A0A8C4LUM8:A0A8C4KXX4:A0A8C4M9E1:A0A8C4M3B4:A0A8C4LMY3:A0A8C4LNL1:A0A8C4LAX9:A0A8C4L5S0:A0A8C4LV13:A0A8C4LX24:A0A8C4LYB5:A0A8C4MZE5:A0A8C4LIZ6:A0A8C4LIA5:A0A8C4MVP1:A0A8C4MF50:A0A8C4MIB0:A0A8C4M7H9:A0A8C4MP75:A0A8C4L1M4:A0A8C4L0M4:A0A8C4MG23:A0A8C4MAY6:A0A8C4LUX7:A0A8C4NB56:A0A8C4MTY2:A0A8C4N2U9:A0A8C4LIL0:A0A8C4LI36:A0A8C4LI35:A0A8C4MLD5:A0A8C4MJU3:A0A8C4MMK2:A0A8C4PSM7:A0A8C4MLT9:A0A…		HCD
M1_RB1_1_8657.d	VEDLPNKKV	F3:27496	9	97	97	9	521.301	0.8767-0.8932	8989.8	1040.59	0.7			HCD
M1_RB1_1_8657.d	M(+42.01)ERAQ(+.98)TLLR	F3:43262	9	97	97	9	580.809	0.9524-0.9689	7925.5	1159.6	1.5		Acetylation (N-term); Deamidation (NQ)	HCD
M1_3_RB1_1_8834.d	DSEKPKKL	F2:4226	8	97	97	8	472.772	0.8235-0.8401	0	943.534	-5.7	A0A8C4LML2		HCD
M1_3_RB1_1_8834.d	EPVKKL	F2:8136	6	97	97	6	357.233	0.7327-0.7494	3534.5	712.448	5.4	A0A8C4MAC7:A0A8C4PQV7:A0A8C4MHP1:A0A8C4MKT7:A0A8C4MCS3		HCD
M1_2_RB1_1_8832.d	KKATLHAVDVT	F1:15546	11	97	97	11	591.849	0.9098-0.9263	2453.4	1181.68	5.9	A0A8C4LSV0		HCD
M1_RB1_1_8657.d	HESTNLSQEKYK	F3:8688	12	97	97	12	732.362	1.0243-1.0407	9424.3	1462.71	3.1	B7VGF9:C1L3G3:A0A8C4MHP1:A0A8C4MKT7:A0A8C4MCS3		HCD
M2-1_2_RB1_1_8837.d	EEVVKKL	F4:11897	7	97	97	7	422.76	0.7647-0.7813	219.23	843.506	-0.1			HCD
M1_RB1_1_8657.d	HESTNLSQEKYK	F3:8693	12	97	97	12	488.577	0.8132-0.8298	24988	1462.71	1.9	B7VGF9:C1L3G3:A0A8C4MHP1:A0A8C4MKT7:A0A8C4MCS3		HCD
M2-1_3_RB1_1_8839.d	LETKEEKLYL	F5:26565	10	97	97	10	633.355	0.9661-0.9826	4439.8	1264.69	3	A0A8C4M7I4		HCD
M1_2_RB1_1_8832.d	LQ(+.98)LTKEEKLYKL	F1:35246	12	97	97	12	502.966	0.8132-0.8298	7028.9	1505.87	3.6	A0A8C4M7I4:A0A8C4LTE2:A0A8C4LBN5	Deamidation (NQ)	HCD
M1_RB1_1_8657.d	VEDLPNKKV	F3:27521	9	97	97	9	521.301	0.8726-0.8891	8989.8	1040.59	0.7			HCD
M1_3_RB1_1_8834.d	DPNHFRPR	F2:8596	8	97	97	8	519.768	0.8574-0.8739	23663	1037.52	6.2	A0A8C4LEB1		HCD
M1_2_RB1_1_8832.d	DKLELTKEEKLY	F1:32362	12	97	97	12	754.918	1.0510-1.0674	665.77	1507.81	5.9	A0A8C4M7I4:A0A8C4LTE2:A0A8C4M6N0:A0A8C4PQ06:A0A8C4M9C8:A0A8C4M5V6:A0A8C4MUK2		HCD
M2-1_RB1_1_8659.d	KHESTNLSQEKY	F6:7441	12	97	97	12	732.36	1.0100-1.0264	2811.8	1462.71	-0.2	B7VGF9:C1L3G3		HCD
M2-1_3_RB1_1_8839.d	LETKEEKLYL	F5:26598	10	97	97	10	633.355	0.9668-0.9833	4439.8	1264.69	3	A0A8C4M7I4		HCD
M1_2_RB1_1_8832.d	PPLKLPK	F1:25058	7	97	97	7	396.771	0.7438-0.7605	2983.8	791.527	0.4	A0A8C4MEG2:A0A8C4LZZ3:A0A8C4MPW1:A0A8C4MUI6		HCD
M2-1_RB1_1_8659.d	DDPVLKKL	F6:21224	8	97	97	8	464.282	0.8028-0.8194	553.76	926.544	6.8	A0A8C4PUS5:A0A8C4MUH2:A0A8C4LIX9		HCD
M1_RB1_1_8657.d	DTVKKL	F3:8709	6	97	97	6	352.222	0.7278-0.7445	2715.5	702.428	3.3	A0A8C4L1V5:A0A8C4L4B8:A0A8C4LYI3:A0A8C4M135:A0A8C4M712		HCD
M1_2_RB1_1_8832.d	PPPPPP	F1:16226	6	97	97	6	601.335	1.1436-1.1599	0	600.327	1.6	A0A8C4MTS8:A0A8C4LUM8:A0A8C4KXX4:A0A8C4M9E1:A0A8C4M3B4:A0A8C4LMY3:A0A8C4LNL1:A0A8C4LAX9:A0A8C4L5S0:A0A8C4LV13:A0A8C4LX24:A0A8C4LYB5:A0A8C4MZE5:A0A8C4LIZ6:A0A8C4LIA5:A0A8C4MVP1:A0A8C4MF50:A0A8C4MIB0:A0A8C4M7H9:A0A8C4MP75:A0A8C4L1M4:A0A8C4L0M4:A0A8C4MG23:A0A8C4MAY6:A0A8C4LUX7:A0A8C4NB56:A0A8C4MTY2:A0A8C4N2U9:A0A8C4LIL0:A0A8C4LI36:A0A8C4LI35:A0A8C4MLD5:A0A8C4MJU3:A0A8C4MMK2:A0A8C4PSM7:A0A8C4MLT9:A0A…		HCD
M1_2_RB1_1_8832.d	EANYLGADKYFHA	F1:39178	13	97	97	13	749.855	1.0189-1.0353	8200.1	1497.69	4.7	A0A8C4LEB1:A0A8C4MGQ5		HCD
M1_3_RB1_1_8834.d	LQ(+.98)LTKEEKLYKL	F2:35185	12	97	97	12	502.965	0.8138-0.8304	6860.9	1505.87	2	A0A8C4M7I4:A0A8C4LTE2:A0A8C4LBN5	Deamidation (NQ)	HCD
M1_3_RB1_1_8834.d	SLTN(+.98)KLELTKEE	F2:34676	12	97	97	12	703.376	1.0100-1.0264	769.89	1404.73	1.8	A0A8C4LTE2:A0A8C4M6N0:A0A8C4PQ06:A0A8C4M9C8:A0A8C4M5V6:A0A8C4MUK2	Deamidation (NQ)	HCD
M2-1_3_RB1_1_8839.d	DEEKNFKA	F5:8030	8	97	97	8	490.739	0.8111-0.8277	1995.3	979.461	2.5			HCD
M1_3_RB1_1_8834.d	M(+42.01)ERAETLLR	F2:43816	9	97	97	9	580.812	0.9407-0.9572	6210.2	1159.6	6.1		Acetylation (N-term)	HCD
M2-1_3_RB1_1_8839.d	HESTNLSQEK	F5:3405	10	97	97	10	586.784	0.8926-0.9091	8242.3	1171.55	6.1	B7VGF9:C1L3G3		HCD
M1_3_RB1_1_8834.d	EANYLGADKYF	F2:44397	11	97	97	11	645.806	0.9345-0.9510	1682.1	1289.59	3.9	A0A8C4LEB1:A0A8C4MGQ5		HCD
M1_2_RB1_1_8832.d	ELEELH	F1:20320	6	97	97	6	769.376	1.2776-1.2938	0	768.365	4			HCD
M1_2_RB1_1_8832.d	TK(+42.01)GPDLLPK	F1:30533	9	97	97	9	505.8	0.8332-0.8498	92142	1009.58	4	A0A8C4LNY7:A0A8C4LWU9:A0A8C4LPU7	Acetylation (K)	HCD
M2-1_2_RB1_1_8837.d	DPNHFRPR	F4:6229	8	97	97	8	519.767	0.8450-0.8615	9561.6	1037.52	4.1	A0A8C4LEB1		HCD
M1_2_RB1_1_8832.d	VEDLKKV	F1:26087	7	97	97	7	415.756	0.7785-0.7952	0	829.491	6.8			HCD
M1_RB1_1_8657.d	WKKATLH	F3:8654	7	97	97	7	442.264	0.7938-0.8104	1438.9	882.508	5.5	A0A8C4LSV0		HCD
M1_3_RB1_1_8834.d	NKKLVKKL	F2:5684	8	97	97	8	485.844	0.8443-0.8608	0	969.67	4.5	A0A8C4L4D1:A0A8C4MMY3:A0A8C4LZT9:A0A8C4KYR6:A0A8C4PFG6:A0A8C4KXU0:A0A8C4N2S5		HCD
M2-1_RB1_1_8659.d	PPPPPP	F6:14155	6	97	97	6	601.332	1.1456-1.1619	0	600.327	-3.5	A0A8C4MTS8:A0A8C4LUM8:A0A8C4KXX4:A0A8C4M9E1:A0A8C4M3B4:A0A8C4LMY3:A0A8C4LNL1:A0A8C4LAX9:A0A8C4L5S0:A0A8C4LV13:A0A8C4LX24:A0A8C4LYB5:A0A8C4MZE5:A0A8C4LIZ6:A0A8C4LIA5:A0A8C4MVP1:A0A8C4MF50:A0A8C4MIB0:A0A8C4M7H9:A0A8C4MP75:A0A8C4L1M4:A0A8C4L0M4:A0A8C4MG23:A0A8C4MAY6:A0A8C4LUX7:A0A8C4NB56:A0A8C4MTY2:A0A8C4N2U9:A0A8C4LIL0:A0A8C4LI36:A0A8C4LI35:A0A8C4MLD5:A0A8C4MJU3:A0A8C4MMK2:A0A8C4PSM7:A0A8C4MLT9:A0A…		HCD
M1_2_RB1_1_8832.d	PPPPP	F1:12468	5	97	97	5	504.284	1.0113-1.0278	0	503.274	4.6			HCD
M1_3_RB1_1_8834.d	LKVNDEDKQKL	F2:9787	11	97	97	11	443.92	0.7633-0.7799	971.18	1328.73	5.7	A0A8C4KYA3		HCD
M1_RB1_1_8657.d	ERFVQDLSK	F3:40718	9	97	97	9	561.302	0.9077-0.9242	2279	1120.59	1.4			HCD
M1_3_RB1_1_8834.d	HESTNLSQEKYK	F2:8795	12	97	97	12	488.578	0.8069-0.8235	21264	1462.71	4.3	B7VGF9:C1L3G3:A0A8C4MHP1:A0A8C4MKT7:A0A8C4MCS3		HCD
M1_2_RB1_1_8832.d	VPQLE	F1:26276	5	97	97	5	585.324	1.1232-1.1395	0	584.317	0.4			HCD
M2-1_2_RB1_1_8837.d	ELTKEEKLYLK	F4:20110	11	97	97	11	697.402	1.0004-1.0168	2330.6	1392.79	2.2	A0A8C4M7I4:A0A8C4LTE2:A0A8C4MQW4:A0A8C4PU43		HCD
M1_RB1_1_8657.d	N(+.98)PVLRKL	F3:25361	7	97	97	7	420.77	0.7979-0.8145	1277.6	839.523	2.2	A0A8C4MK65	Deamidation (NQ)	HCD
M1_3_RB1_1_8834.d	DPATQPLVPVHNPVLN	F2:48098	16	97	97	16	855.968	1.0946-1.1110	50206	1709.91	6.8	D2EC27		HCD
M2-1_RB1_1_8659.d	ELTKEEKLY	F6:18402	9	97	97	9	576.811	0.9180-0.9345	38394	1151.61	-0.2	A0A8C4M7I4:A0A8C4LTE2		HCD
M1_3_RB1_1_8834.d	EKVQKYK	F2:4346	7	97	97	7	461.772	0.8360-0.8526	113.2	921.528	0.3			HCD
M1_3_RB1_1_8834.d	KGNLEYK	F2:7520	7	97	97	7	426.237	0.8076-0.8242	231.62	850.455	5.5			HCD
M1_2_RB1_1_8832.d	DEVRKLLRL	F1:26724	9	97	97	9	381.241	0.7278-0.7445	565.62	1140.7	1.9	A0A8C4LBX7:A0A8C4LML2:A0A8C4LGG5		HCD
M1_RB1_1_8657.d	ADTKELVSSKVS	F3:19643	12	97	97	12	632.344	0.9908-1.0072	1106.4	1262.67	0.8	A0A8C4LD25:A0A8C4PSY6:A0A8C4MMW0		HCD
M2-1_RB1_1_8659.d	HESTNLSQEK	F6:3407	10	97	97	10	586.783	0.8926-0.9091	11585	1171.55	3.8	B7VGF9:C1L3G3		HCD
M2-1_3_RB1_1_8839.d	HESTNLSQEKY	F5:10906	11	97	97	11	668.315	0.9352-0.9517	17017	1334.61	3.2	B7VGF9:C1L3G3		HCD
M1_3_RB1_1_8834.d	TK(+42.01)GPDLLPK	F2:30415	9	97	97	9	505.799	0.8318-0.8484	91243	1009.58	2	A0A8C4LNY7:A0A8C4LWU9:A0A8C4LPU7	Acetylation (K)	HCD
M1_RB1_1_8657.d	ETLLR	F3:17700	5	97	97	5	631.377	1.1897-1.2060	0	630.37	0.2			HCD
M1_3_RB1_1_8834.d	T(+42.01)TLTH	F2:17173	5	97	97	5	614.316	1.1450-1.1613	0	613.307	2.9		Acetylation (N-term)	HCD
M1_RB1_1_8657.d	AEEKKKKKL	F3:1324	9	97	97	9	551.354	0.8760-0.8926	1394.1	1100.69	2.3	A0A8C4LPN9:A0A8C4MD96:A0A8C4MLY4:A0A8C4MMG4:A0A8C4LYI3:A0A8C4M135:A0A8C4M712:A0A8C4MP75:A0A8C4L946:A0A8C4LA58:A0A8C4L2G1:A0A8C4L6W9:A0A8C4MGD3:A0A8C4LRW5:A0A8C4KUB0:A0A8C4PS52:A0A8C4L727:A0A8C4L5Z6:A0A8C4M1Y3:A0A8C4M2V3:A0A8C4M099:A0A8C4M5N7:A0A8C4LZT9:A0A8C4KQK5:A0A8C4PL28:A0A8C4LLN8:A0A8C4LJP8:A0A8C4MQT7:A0A8C4MPM2:A0A8C4MNE2:A0A8C4MD75:A0A8C4PRJ1:A0A8C4MEB5:A0A8C4MCX6:A0A8C4PRX7:A0A8C4PGF3:A0A…		HCD
M1_3_RB1_1_8834.d	LPLTE	F2:32435	5	97	97	5	572.327	1.1341-1.1504	0	571.322	-4			HCD
M1_3_RB1_1_8834.d	DLDDKLLK	F2:26489	8	97	97	8	480.276	0.8443-0.8608	672.92	958.533	3			HCD
M1_2_RB1_1_8832.d	LPDKY	F1:16614	5	97	97	5	635.34	1.1735-1.1897	0	634.333	0.7			HCD
M1_RB1_1_8657.d	SPLPN(+.98)LFPADFK	F3:56131	12	97	97	12	673.854	0.9469-0.9634	21079	1345.69	1.8	A0A8C4LDF2:A0A8C4LHM4:A0A8C4LGD8	Deamidation (NQ)	HCD
M1_3_RB1_1_8834.d	HESTNLSQEKY	F2:13675	11	97	97	11	668.315	0.9448-0.9613	13617	1334.61	4.5	B7VGF9:C1L3G3		HCD
M1_3_RB1_1_8834.d	DEFRKL	F2:19609	6	97	97	6	404.222	0.7612-0.7778	602.71	806.429	1.5			HCD
M2-1_3_RB1_1_8839.d	HESTNLSQEK	F5:3332	10	97	97	10	586.784	0.9008-0.9173	8242.3	1171.55	6.1	B7VGF9:C1L3G3		HCD
M1_RB1_1_8657.d	QEEKKKKKL	F3:1514	9	97	97	9	579.864	0.9125-0.9290	2418.7	1157.71	0.6	A0A8C4LPN9:A0A8C4MD96:A0A8C4MLY4:A0A8C4MMG4:A0A8C4MP75:A0A8C4L946:A0A8C4LA58:A0A8C4L2G1:A0A8C4L6W9:A0A8C4MGD3:A0A8C4LAY0:A0A8C4LRW5:A0A8C4KUB0:A0A8C4PS52:A0A8C4L727:A0A8C4L5Z6:A0A8C4M1Y3:A0A8C4M2V3:A0A8C4M099:A0A8C4M5N7:A0A8C4LZT9:A0A8C4KQK5:A0A8C4PL28:A0A8C4LLN8:A0A8C4LJP8:A0A8C4MQT7:A0A8C4MPM2:A0A8C4MNE2:A0A8C4MD75:A0A8C4PRJ1:A0A8C4MEB5:A0A8C4MCX6:A0A8C4PRX7:A0A8C4PGF3:A0A8C4LZB6:A0A8C4MPW1:A0A…		HCD
M1_2_RB1_1_8832.d	PPPPPP	F1:19000	6	97	97	6	601.335	1.1280-1.1443	0	600.327	1.6	A0A8C4MTS8:A0A8C4LUM8:A0A8C4KXX4:A0A8C4M9E1:A0A8C4M3B4:A0A8C4LMY3:A0A8C4LNL1:A0A8C4LAX9:A0A8C4L5S0:A0A8C4LV13:A0A8C4LX24:A0A8C4LYB5:A0A8C4MZE5:A0A8C4LIZ6:A0A8C4LIA5:A0A8C4MVP1:A0A8C4MF50:A0A8C4MIB0:A0A8C4M7H9:A0A8C4MP75:A0A8C4L1M4:A0A8C4L0M4:A0A8C4MG23:A0A8C4MAY6:A0A8C4LUX7:A0A8C4NB56:A0A8C4MTY2:A0A8C4N2U9:A0A8C4LIL0:A0A8C4LI36:A0A8C4LI35:A0A8C4MLD5:A0A8C4MJU3:A0A8C4MMK2:A0A8C4PSM7:A0A8C4MLT9:A0A…		HCD
M2-1_2_RB1_1_8837.d	KHESTNLSQEKYK	F4:4254	13	97	97	13	531.277	0.8076-0.8242	8607.6	1590.8	5.8	B7VGF9:C1L3G3:A0A8C4MHP1:A0A8C4MKT7:A0A8C4MCS3		HCD
M2-1_2_RB1_1_8837.d	EDGHVKV	F4:6000	7	97	97	7	392.204	0.7369-0.7535	4960.1	782.392	2.7			HCD
M1_2_RB1_1_8832.d	DKDKEKKL	F1:2030	8	97	97	8	502.291	0.8291-0.8457	537.28	1002.57	-3.9	A0A8C4M1L5:A0A8C4PU68:A0A8C4PSE2:A0A8C4MCS9		HCD
M1_3_RB1_1_8834.d	RSKFR	F2:2217	5	97	97	5	347.213	0.7459-0.7626	0	692.408	4			HCD
M1_2_RB1_1_8832.d	RAETLLR	F1:14368	7	97	97	7	429.764	0.7945-0.8111	2008.4	857.508	5			HCD
M1_3_RB1_1_8834.d	ELTKEEKLYLK	F2:25395	11	97	97	11	465.272	0.8000-0.8166	7408.8	1392.79	4.9	A0A8C4M7I4:A0A8C4LTE2:A0A8C4MQW4:A0A8C4PU43		HCD
M1_3_RB1_1_8834.d	LPDLFPADFK	F2:55999	10	97	97	10	581.812	0.8926-0.9091	25961	1161.61	2.4			HCD
M1_3_RB1_1_8834.d	EELLR	F2:20426	5	97	97	5	659.373	1.2141-1.2303	0	658.365	1.3			HCD
M1_RB1_1_8657.d	DQDPLTKT	F3:14634	8	97	97	8	459.233	0.7952-0.8118	2098.2	916.45	0.5	A0A8C4KZN3:A0A8C4L2D4		HCD
M1_3_RB1_1_8834.d	EDGHVKV	F2:8618	7	97	97	7	392.204	0.7438-0.7605	1160.2	782.392	0.4			HCD
M1_RB1_1_8657.d	HESTNLSQEKYK	F3:8748	12	97	97	12	488.577	0.8021-0.8187	24988	1462.71	1.9	B7VGF9:C1L3G3:A0A8C4MHP1:A0A8C4MKT7:A0A8C4MCS3		HCD
M1_RB1_1_8657.d	HQHQTTM(+15.99)DPQSHKVLL	F3:17966	16	97	97	16	639.322	0.9400-0.9565	4593.1	1914.94	3.7	B7VGF9:A0A8C4MBA7	Oxidation (M)	HCD
M1_2_RB1_1_8832.d	SPLPDLFPADFK	F1:57041	12	97	97	12	673.856	0.9860-1.0024	105660	1345.69	4.7	A0A8C4L6A6		HCD
M1_3_RB1_1_8834.d	DPQSHKVL	F2:12342	8	97	97	8	462.253	0.7813-0.7979	1876.7	922.487	3.7	A0A8C4MBA7		HCD
M2-1_RB1_1_8659.d	DLDDKLLK	F6:20412	8	97	97	8	480.273	0.8436-0.8601	1206	958.533	-1.8			HCD
M2-1_RB1_1_8659.d	DAAKKRVKA	F6:2447	9	97	97	9	493.807	0.8567-0.8733	0	985.603	-3.7			HCD
M1_RB1_1_8657.d	PPLKLKP	F3:24941	7	97	97	7	396.771	0.8007-0.8173	605.28	791.527	0.3			HCD
M1_RB1_1_8657.d	M(+42.01)(+15.99)ERAETLLR	F3:30738	9	97	97	9	588.807	0.9524-0.9689	7730.6	1175.6	2.9		Acetylation (N-term); Oxidation (M)	HCD
M2-1_RB1_1_8659.d	DPQSHKVL	F6:9787	8	97	97	8	462.252	0.7868-0.8035	1472.7	922.487	3.5	A0A8C4MBA7		HCD
M2-1_RB1_1_8659.d	EKEELNVSSK	F6:9297	10	97	97	10	581.801	0.8953-0.9118	1763.3	1161.59	-1.1	D2EC27:A0A8C4MZM0		HCD
M1_3_RB1_1_8834.d	KFPLFK	F2:35461	6	97	97	6	390.246	0.7979-0.8145	0	778.474	4.2			HCD
M2-1_RB1_1_8659.d	ELTKEEKLY	F6:18354	9	97	97	9	576.811	0.9160-0.9325	38394	1151.61	-0.2	A0A8C4M7I4:A0A8C4LTE2		HCD
M1_2_RB1_1_8832.d	GAQ(+.98)EKKKKKL	F1:1506	10	97	97	10	579.865	0.9022-0.9187	2820.2	1157.71	1.1	A0A8C4L1V5:A0A8C4L4B8:A0A8C4MD96:A0A8C4LAH0:A0A8C4LQJ7:A0A8C4MZE5:A0A8C4MLY4:A0A8C4MMG4:A0A8C4MP75:A0A8C4L946:A0A8C4LA58:A0A8C4L2G1:A0A8C4L6W9:A0A8C4MGD3:A0A8C4MEI5:A0A8C4MEJ9:A0A8C4M6Y4:A0A8C4M530:A0A8C4MEG2:A0A8C4LRW5:A0A8C4KUB0:A0A8C4PS52:A0A8C4L727:A0A8C4L5Z6:A0A8C4M1Y3:A0A8C4M2V3:A0A8C4M099:A0A8C4M5N7:A0A8C4LZT9:A0A8C4KQK5:A0A8C4PL28:A0A8C4LLN8:A0A8C4LJP8:A0A8C4MQT7:A0A8C4MPM2:A0A8C4MNE2:A0A…	Deamidation (NQ)	HCD
M1_RB1_1_8657.d	K(+42.01)QSGVN(+.98)MTKSVVTS	F3:32474	14	97	97	14	754.888	1.0407-1.0571	416.18	1507.76	4.1		Acetylation (N-term); Deamidation (NQ)	HCD
M1_3_RB1_1_8834.d	DTKQ(+.98)LVSSKVS	F2:20572	11	97	97	11	596.827	0.9208-0.9373	200.06	1191.63	3.5		Deamidation (NQ)	HCD
M1_3_RB1_1_8834.d	LPDKY	F2:16561	5	97	97	5	635.34	1.1735-1.1897	0	634.333	0.7			HCD
M1_2_RB1_1_8832.d	DLDDKLLK	F1:26477	8	97	97	8	480.277	0.8443-0.8608	429.46	958.533	6.4			HCD
M1_2_RB1_1_8832.d	SPLPN(+.98)LFPADFK	F1:57066	12	97	97	12	673.856	0.9661-0.9826	105660	1345.69	4.7	A0A8C4LDF2:A0A8C4LHM4:A0A8C4LGD8	Deamidation (NQ)	HCD
M2-1_RB1_1_8659.d	DPDTAHPHL	F6:14928	9	97	97	9	501.737	0.8643-0.8808	3608.7	1001.46	3.1	A0A8C4LD23		HCD
M1_RB1_1_8657.d	PNHFRPR	F3:5017	7	97	97	7	462.251	0.8173-0.8339	1839.3	922.489	-0.6	A0A8C4LEB1		HCD
M1_RB1_1_8657.d	DPNHFRPR	F3:8523	8	97	97	8	519.767	0.8664-0.8829	23882	1037.52	4.2	A0A8C4LEB1		HCD
M2-1_RB1_1_8659.d	M(+42.01)EAHE	F6:11254	5	97	97	5	658.251	1.1884-1.2046	0	657.243	0.8		Acetylation (N-term)	HCD
M2-1_RB1_1_8659.d	EEKVQKF	F6:8813	7	97	97	7	454.249	0.7889-0.8055	3974.2	906.481	3.1	D2EC27:A0A8C4KT44:A0A8C4MNE2:A0A8C4MD75:A0A8C4PRJ1:A0A8C4MEB5:A0A8C4MCX6:A0A8C4PRX7		HCD
M1_2_RB1_1_8832.d	EKEQ(+.98)LNVSSK	F1:11853	10	97	97	10	581.805	0.8884-0.9050	598.34	1161.59	6.7	A0A8C4PTH7	Deamidation (NQ)	HCD
M1_RB1_1_8657.d	TPKKPKKA	F3:1454	8	97	97	8	449.299	0.7889-0.8055	3452.4	896.581	2.6	A0A8C4L7E5:A0A8C4LD74:A0A8C4PJP9:A0A8C4LGI0:A0A8C4LH82:A0A8C4KWP0:A0A8C4MPW1:A0A8C4MUI6		HCD
M1_RB1_1_8657.d	DPQSHKVL	F3:12316	8	97	97	8	462.25	0.7889-0.8055	2210.8	922.487	-0.8	A0A8C4MBA7		HCD
M2-1_3_RB1_1_8839.d	HESTNLSQEK	F5:3323	10	97	97	10	586.784	0.8926-0.9091	8242.3	1171.55	6.1	B7VGF9:C1L3G3		HCD
M1_3_RB1_1_8834.d	SPLPN(+.98)LFPADFK	F2:57032	12	97	97	12	673.856	0.9860-1.0024	116350	1345.69	4.4	A0A8C4LDF2:A0A8C4LHM4:A0A8C4LGD8	Deamidation (NQ)	HCD
M1_2_RB1_1_8832.d	NHFRPR	F1:3713	6	97	97	6	413.727	0.7834-0.8000	1559.4	825.436	3.6			HCD
M1_3_RB1_1_8834.d	DEVRKLLRL	F2:26718	9	97	97	9	381.241	0.7278-0.7445	414.54	1140.7	3.4	A0A8C4LBX7:A0A8C4LML2:A0A8C4LGG5		HCD
M1_RB1_1_8657.d	DSESAPLRVYLEK	F3:38600	13	97	97	13	753.894	1.0503-1.0667	1938.7	1505.77	0.1	P13613:D6QX32:D6QX31		HCD
M1_RB1_1_8657.d	TK(+42.01)GPDLLPK	F3:30136	9	97	97	9	505.797	0.8408-0.8574	87777	1009.58	-0.8	A0A8C4LNY7:A0A8C4LWU9:A0A8C4LPU7	Acetylation (K)	HCD
M1_2_RB1_1_8832.d	DSESAPLRVYLEK	F1:39190	13	97	97	13	753.896	1.0407-1.0571	2262.8	1505.77	3.5	P13613:D6QX32:D6QX31		HCD
M1_RB1_1_8657.d	HESTNLSQEK	F3:5075	10	97	97	10	586.782	0.8836-0.9001	1753.5	1171.55	2	B7VGF9:C1L3G3		HCD
M1_RB1_1_8657.d	ETLLR	F3:17730	5	97	97	5	631.379	1.1911-1.2073	0	630.37	2.7			HCD
M1_RB1_1_8657.d	T(+42.01)TLTH	F3:16880	5	97	97	5	614.313	1.1572-1.1735	0	613.307	-2.5		Acetylation (N-term)	HCD
M1_2_RB1_1_8832.d	ERAETLLR	F1:18178	8	97	97	8	494.283	0.8608-0.8774	262.89	986.551	1.5			HCD
M1_3_RB1_1_8834.d	PPKLPH	F2:7429	6	97	97	6	344.712	0.7084-0.7251	487.59	687.407	3.1			HCD
M2-1_RB1_1_8659.d	DPLTKT	F6:7154	6	97	97	6	674.369	1.1931-1.2094	0	673.365	-4.1	A0A8C4KZN3:A0A8C4L2D4		HCD
M1_3_RB1_1_8834.d	HESTNLSQEK	F2:5132	10	97	97	10	586.783	0.8774-0.8939	1502.6	1171.55	3.3	B7VGF9:C1L3G3		HCD
M1_3_RB1_1_8834.d	WPELE	F2:47348	5	97	97	5	673.321	1.1999-1.2161	0	672.312	2.3			HCD
M2-1_RB1_1_8659.d	HESTNLSQEK	F6:3372	10	97	97	10	586.783	0.8994-0.9160	11585	1171.55	3.8	B7VGF9:C1L3G3		HCD
M2-1_RB1_1_8659.d	HESTNLSQEKY	F6:10852	11	97	97	11	668.316	0.9428-0.9593	16558	1334.61	4.6	B7VGF9:C1L3G3		HCD
M1_3_RB1_1_8834.d	DELVKKL	F2:22673	7	97	97	7	422.762	0.7771-0.7938	282.03	843.506	2.5	A0A8C4L9Z3:A0A8C4LBK0:A0A8C4LEL1:A0A8C4LGW5:A0A8C4LB42:A0A8C4LJD7:A0A8C4LKU6		HCD
M2-1_2_RB1_1_8837.d	LPDKY	F4:13099	5	97	97	5	635.337	1.1789-1.1952	0	634.333	-5.3			HCD
M1_RB1_1_8657.d	SPLPN(+.98)LFPADFK	F3:56077	12	97	97	12	673.854	0.9750-0.9915	99611	1345.69	1.6	A0A8C4LDF2:A0A8C4LHM4:A0A8C4LGD8	Deamidation (NQ)	HCD
M2-1_RB1_1_8659.d	WPELE	F6:29556	5	96	96	5	673.32	1.2026-1.2188	0	672.312	1.4			HCD
M1_2_RB1_1_8832.d	LELTKEEKLYLK	F1:35278	12	96	96	12	753.946	1.0701-1.0865	1014.5	1505.87	4.6	A0A8C4M7I4:A0A8C4LTE2:A0A8C4M6N0:A0A8C4PQ06:A0A8C4M9C8:A0A8C4M5V6:A0A8C4MQW4:A0A8C4PU43		HCD
M1_3_RB1_1_8834.d	RAETLLR	F2:14293	7	96	96	7	429.763	0.7945-0.8111	1953.4	857.508	3.7			HCD
M1_RB1_1_8657.d	DSPFLK	F3:29886	6	96	96	6	706.38	1.2344-1.2506	0	705.37	4.9			HCD
M1_2_RB1_1_8832.d	HESTNLS(+79.97)QEKYK	F1:10696	12	96	96	12	772.345	1.0339-1.0503	242750	1542.67	2.4	B7VGF9:C1L3G3:A0A8C4MHP1:A0A8C4MKT7:A0A8C4MCS3	Phosphorylation (STY)	HCD
M1_3_RB1_1_8834.d	PPLKLKP	F2:25103	7	96	96	7	396.773	0.7924-0.8090	308.33	791.527	5.1			HCD
M2-1_3_RB1_1_8839.d	ELEKKF	F5:10857	6	96	96	6	397.227	0.7584-0.7751	0	792.438	1.7	A0A8C4MXV1		HCD
M1_2_RB1_1_8832.d	HSDAVSLCVLKPDPSQK	F1:35887	17	96	96	17	608.652	0.9008-0.9173	53539	1822.92	4.3	A0A8C4LXL5:A0A8C4MLW6		HCD
M1_2_RB1_1_8832.d	EANYLGWKYFH	F1:35909	11	96	96	11	714.339	0.9956-1.0120	452.17	1426.67	-2.2			HCD
M2-1_RB1_1_8659.d	ELTKEEKLYLK	F6:19893	11	96	96	11	465.269	0.8000-0.8166	11283	1392.79	-0.3	A0A8C4M7I4:A0A8C4LTE2:A0A8C4MQW4:A0A8C4PU43		HCD
M1_RB1_1_8657.d	ERFVQDLSK	F3:40592	9	96	96	9	561.302	0.9098-0.9263	2279	1120.59	1.4			HCD
M1_2_RB1_1_8832.d	EEKVQKF	F1:11451	7	96	96	7	454.249	0.7855-0.8021	2138.2	906.481	3.3	D2EC27:A0A8C4KT44:A0A8C4MNE2:A0A8C4MD75:A0A8C4PRJ1:A0A8C4MEB5:A0A8C4MCX6:A0A8C4PRX7		HCD
M1_RB1_1_8657.d	EDGHVKV	F3:8562	7	96	96	7	392.204	0.7535-0.7702	946.82	782.392	0.8			HCD
M1_2_RB1_1_8832.d	ERFVQDLSK	F1:41489	9	96	96	9	561.304	0.8974-0.9139	2265.5	1120.59	4.7			HCD
M2-1_2_RB1_1_8837.d	ETLLR	F4:14213	5	96	96	5	631.378	1.1816-1.1979	0	630.37	1.6			HCD
M2-1_RB1_1_8659.d	DEEKNFKA	F6:7999	8	96	96	8	490.739	0.8159-0.8325	2918.2	979.461	3			HCD
M1_3_RB1_1_8834.d	KVM(+15.99)PFLK	F2:23203	7	96	96	7	439.762	0.7952-0.8118	0	877.51	0	D2EC27	Oxidation (M)	HCD
M1_3_RB1_1_8834.d	HESTNLS(+79.97)QEKYK	F2:10661	12	96	96	12	772.344	1.0394-1.0558	251380	1542.67	1.2	B7VGF9:C1L3G3:A0A8C4MHP1:A0A8C4MKT7:A0A8C4MCS3	Phosphorylation (STY)	HCD
M1_RB1_1_8657.d	DDKLLK	F3:10565	6	96	96	6	366.219	0.7508-0.7674	651	730.423	1.1			HCD
M2-1_2_RB1_1_8837.d	M(+42.01)Q(+.98)GAEEKKKKKL	F4:5779	12	96	96	12	487.61	0.7508-0.7674	1089.3	1459.81	1.4	A0A8C4LPN9:A0A8C4MD96:A0A8C4MLY4:A0A8C4MMG4:A0A8C4LYI3:A0A8C4M135:A0A8C4M712:A0A8C4MP75:A0A8C4L946:A0A8C4LA58:A0A8C4L2G1:A0A8C4L6W9:A0A8C4MGD3:A0A8C4LRW5:A0A8C4KUB0:A0A8C4PS52:A0A8C4L727:A0A8C4L5Z6:A0A8C4M1Y3:A0A8C4M2V3:A0A8C4M099:A0A8C4M5N7:A0A8C4LZT9:A0A8C4KQK5:A0A8C4PL28:A0A8C4LLN8:A0A8C4LJP8:A0A8C4MQT7:A0A8C4MPM2:A0A8C4MNE2:A0A8C4MD75:A0A8C4PRJ1:A0A8C4MEB5:A0A8C4MCX6:A0A8C4PRX7:A0A8C4PGF3:A0A…	Acetylation (N-term); Deamidation (NQ)	HCD
M1_RB1_1_8657.d	DDSLLRL	F3:49110	7	96	96	7	416.232	0.7861-0.8028	296.95	830.45	-0.6			HCD
M1_RB1_1_8657.d	LPDLFPADFK	F3:55070	10	96	96	10	581.811	0.9001-0.9167	26906	1161.61	0.9			HCD
M2-1_RB1_1_8659.d	WPELE	F6:29585	5	96	96	5	673.319	1.1999-1.2161	0	672.312	0.4			HCD
M1_3_RB1_1_8834.d	QLEKEHH	F2:1680	7	96	96	7	460.736	0.8145-0.8311	0	919.451	6.3			HCD
M1_2_RB1_1_8832.d	HQTTMDPQSHKVLL	F1:28015	14	96	96	14	545.618	0.8208-0.8374	3586.4	1633.82	4.2	B7VGF9:A0A8C4MBA7		HCD
M1_3_RB1_1_8834.d	KLELTKEE	F2:16179	8	96	96	8	495.28	0.8235-0.8401	395.22	988.544	0.8	A0A8C4LTE2:A0A8C4M6N0:A0A8C4PQ06:A0A8C4M9C8:A0A8C4M5V6:A0A8C4MUK2		HCD
M1_2_RB1_1_8832.d	DTVKKL	F1:8795	6	96	96	6	352.223	0.7202-0.7369	2586.2	702.428	5.6	A0A8C4L1V5:A0A8C4L4B8:A0A8C4LYI3:A0A8C4M135:A0A8C4M712		HCD
M1_3_RB1_1_8834.d	EDGPKFL	F2:38296	7	96	96	7	403.209	0.7383-0.7549	1110.5	804.402	1.7	A0A8C4L5X9		HCD
M1_2_RB1_1_8832.d	QHATKGSHVKV	F1:3496	11	96	96	11	596.334	0.9201-0.9366	423.99	1190.65	0.9			HCD
M1_RB1_1_8657.d	HSDAVSLCVLKPDPSQK	F3:35366	17	96	96	17	608.649	0.9111-0.9277	52256	1822.92	0.9	A0A8C4LXL5:A0A8C4MLW6		HCD
M1_2_RB1_1_8832.d	TK(+42.01)GPDLLPK	F1:30309	9	96	96	9	505.8	0.8318-0.8484	92142	1009.58	4	A0A8C4LNY7:A0A8C4LWU9:A0A8C4LPU7	Acetylation (K)	HCD
M1_2_RB1_1_8832.d	QEEKKKKKL	F1:1473	9	96	96	9	579.865	0.9029-0.9194	2820.2	1157.71	1.1	A0A8C4LPN9:A0A8C4MD96:A0A8C4MLY4:A0A8C4MMG4:A0A8C4MP75:A0A8C4L946:A0A8C4LA58:A0A8C4L2G1:A0A8C4L6W9:A0A8C4MGD3:A0A8C4LAY0:A0A8C4LRW5:A0A8C4KUB0:A0A8C4PS52:A0A8C4L727:A0A8C4L5Z6:A0A8C4M1Y3:A0A8C4M2V3:A0A8C4M099:A0A8C4M5N7:A0A8C4LZT9:A0A8C4KQK5:A0A8C4PL28:A0A8C4LLN8:A0A8C4LJP8:A0A8C4MQT7:A0A8C4MPM2:A0A8C4MNE2:A0A8C4MD75:A0A8C4PRJ1:A0A8C4MEB5:A0A8C4MCX6:A0A8C4PRX7:A0A8C4PGF3:A0A8C4LZB6:A0A8C4MPW1:A0A…		HCD
M1_3_RB1_1_8834.d	ELLKRT	F2:10330	6	96	96	6	380.24	0.7626-0.7792	0	758.465	0.9	A0A8C4PTH7		HCD
M1_3_RB1_1_8834.d	PPLKLPK	F2:24942	7	96	96	7	396.772	0.7431-0.7598	2963.3	791.527	3.8	A0A8C4MEG2:A0A8C4LZZ3:A0A8C4MPW1:A0A8C4MUI6		HCD
M1_2_RB1_1_8832.d	LDVKKL	F1:10756	6	96	96	6	358.241	0.7230-0.7397	0	714.464	4.5			HCD
M1_RB1_1_8657.d	HSWVSLTTTKPDPSQK	F3:36803	16	96	96	16	604.648	0.9118-0.9283	13128	1810.92	1	A0A8C4LXL5		HCD
M1_RB1_1_8657.d	HESTNLSQEKYK	F3:8768	12	96	96	12	488.577	0.8166-0.8332	24988	1462.71	1.9	B7VGF9:C1L3G3:A0A8C4MHP1:A0A8C4MKT7:A0A8C4MCS3		HCD
M1_3_RB1_1_8834.d	SPLPN(+.98)LFPADFK	F2:57067	12	96	96	12	673.856	0.9682-0.9846	116350	1345.69	4.4	A0A8C4LDF2:A0A8C4LHM4:A0A8C4LGD8	Deamidation (NQ)	HCD
M1_RB1_1_8657.d	LQ(+.98)LTKEEKLYKL	F3:34709	12	96	96	12	502.963	0.8194-0.8360	7004.5	1505.87	-2.2	A0A8C4M7I4:A0A8C4LTE2:A0A8C4LBN5	Deamidation (NQ)	HCD
M1_3_RB1_1_8834.d	SPFLLKT	F2:41696	7	96	96	7	403.245	0.7501-0.7667	0	804.475	0.9	A0A8C4MKR0:A0A8C4MME7		HCD
M2-1_RB1_1_8659.d	PPPPPP	F6:12821	6	96	96	6	601.332	1.1531-1.1694	0	600.327	-3.5	A0A8C4MTS8:A0A8C4LUM8:A0A8C4KXX4:A0A8C4M9E1:A0A8C4M3B4:A0A8C4LMY3:A0A8C4LNL1:A0A8C4LAX9:A0A8C4L5S0:A0A8C4LV13:A0A8C4LX24:A0A8C4LYB5:A0A8C4MZE5:A0A8C4LIZ6:A0A8C4LIA5:A0A8C4MVP1:A0A8C4MF50:A0A8C4MIB0:A0A8C4M7H9:A0A8C4MP75:A0A8C4L1M4:A0A8C4L0M4:A0A8C4MG23:A0A8C4MAY6:A0A8C4LUX7:A0A8C4NB56:A0A8C4MTY2:A0A8C4N2U9:A0A8C4LIL0:A0A8C4LI36:A0A8C4LI35:A0A8C4MLD5:A0A8C4MJU3:A0A8C4MMK2:A0A8C4PSM7:A0A8C4MLT9:A0A…		HCD
M1_3_RB1_1_8834.d	SPLPN(+.98)LFPADFK	F2:57020	12	96	96	12	673.856	0.9846-1.0011	116350	1345.69	4.4	A0A8C4LDF2:A0A8C4LHM4:A0A8C4LGD8	Deamidation (NQ)	HCD
M1_RB1_1_8657.d	PPLKLP	F3:39420	6	96	96	6	332.724	0.7549-0.7716	2905.7	663.432	1.3	A0A8C4MEG2:A0A8C4LZZ3:A0A8C4MPW1:A0A8C4MUI6		HCD
M1_2_RB1_1_8832.d	KHESTNLSQEKYK	F1:6785	13	96	96	13	531.277	0.8090-0.8256	5076.6	1590.8	5.1	B7VGF9:C1L3G3:A0A8C4MHP1:A0A8C4MKT7:A0A8C4MCS3		HCD
M1_2_RB1_1_8832.d	DPLTKT	F1:9873	6	96	96	6	674.375	1.1809-1.1972	0	673.365	4.2	A0A8C4KZN3:A0A8C4L2D4		HCD
M1_3_RB1_1_8834.d	LELTKEEKLYLK	F2:35179	12	96	96	12	753.947	1.0681-1.0844	964.56	1505.87	5.4	A0A8C4M7I4:A0A8C4LTE2:A0A8C4M6N0:A0A8C4PQ06:A0A8C4M9C8:A0A8C4M5V6:A0A8C4MQW4:A0A8C4PU43		HCD
M1_2_RB1_1_8832.d	DPQSHKVL	F1:12432	8	96	96	8	462.253	0.7799-0.7965	2123.8	922.487	4	A0A8C4MBA7		HCD
M1_3_RB1_1_8834.d	DDSLLRL	F2:49670	7	96	96	7	416.233	0.7730-0.7896	505.5	830.45	3.1			HCD
M1_RB1_1_8657.d	ELPKKTV	F3:9474	7	96	96	7	407.757	0.7799-0.7965	6307.6	813.496	3.4	B7VGF9		HCD
M1_RB1_1_8657.d	KKATLH	F3:1385	6	96	96	6	349.222	0.7230-0.7397	653.97	696.428	2.2	A0A8C4LSV0		HCD
M1_RB1_1_8657.d	LQ(+.98)LTKEEKLYKL	F3:34738	12	96	96	12	502.963	0.8125-0.8291	7004.5	1505.87	-2.2	A0A8C4M7I4:A0A8C4LTE2:A0A8C4LBN5	Deamidation (NQ)	HCD
M2-1_3_RB1_1_8839.d	EEKVQKF	F5:8877	7	96	96	7	454.249	0.7820-0.7986	4051.4	906.481	2.3	D2EC27:A0A8C4KT44:A0A8C4MNE2:A0A8C4MD75:A0A8C4PRJ1:A0A8C4MEB5:A0A8C4MCX6:A0A8C4PRX7		HCD
M1_RB1_1_8657.d	WPELE	F3:46747	5	96	96	5	673.319	1.2114-1.2276	0	672.312	0.4			HCD
M1_2_RB1_1_8832.d	PNHFRPR	F1:5021	7	96	96	7	462.254	0.8090-0.8256	2323.7	922.489	5.5	A0A8C4LEB1		HCD
M1_2_RB1_1_8832.d	EDGPKFL	F1:38258	7	96	96	7	403.208	0.7383-0.7549	1189.7	804.402	-1	A0A8C4L5X9		HCD
M1_RB1_1_8657.d	PNHFRPR	F3:4967	7	96	96	7	462.251	0.8194-0.8360	1839.3	922.489	-0.6	A0A8C4LEB1		HCD
M1_3_RB1_1_8834.d	MPFLK	F2:38461	5	96	96	5	318.184	0.7251-0.7417	20461	634.351	4.2			HCD
M1_3_RB1_1_8834.d	EKVEKFK	F2:5672	7	96	96	7	454.267	0.8104-0.8270	796.15	906.517	1.5			HCD
M1_2_RB1_1_8832.d	TPKKPK	F1:1440	6	96	96	6	349.732	0.7549-0.7716	1857.8	697.449	1.2	A0A8C4MPW1:A0A8C4MUI6		HCD
M2-1_2_RB1_1_8837.d	EPVKKL	F4:5497	6	96	96	6	357.234	0.7369-0.7535	6009	712.448	6.9	A0A8C4MAC7:A0A8C4PQV7:A0A8C4MHP1:A0A8C4MKT7:A0A8C4MCS3		HCD
M2-1_2_RB1_1_8837.d	DEEKNFKA	F4:7880	8	96	96	8	490.738	0.8104-0.8270	3040.7	979.461	1.5			HCD
M2-1_2_RB1_1_8837.d	HESTNLSQEKY	F4:10802	11	96	96	11	668.315	0.9338-0.9503	16876	1334.61	3.4	B7VGF9:C1L3G3		HCD
M2-1_2_RB1_1_8837.d	KHESTNLSQEKYK	F4:4240	13	96	96	13	531.277	0.8076-0.8242	8607.6	1590.8	5.8	B7VGF9:C1L3G3:A0A8C4MHP1:A0A8C4MKT7:A0A8C4MCS3		HCD
M1_RB1_1_8657.d	DLDDKLLK	F3:26306	8	96	96	8	480.275	0.8560-0.8726	481.43	958.533	1.6			HCD
M1_2_RB1_1_8832.d	SVRLED	F1:15351	6	96	96	6	359.692	0.7202-0.7369	1005.7	717.366	4	A0A8C4LD23		HCD
M1_RB1_1_8657.d	RVLEDRA	F3:11148	7	96	96	7	429.745	0.8049-0.8215	1191.6	857.472	3			HCD
M1_2_RB1_1_8832.d	EPVKKL	F1:8143	6	96	96	6	357.233	0.7334-0.7501	3305.9	712.448	4.7	A0A8C4MAC7:A0A8C4PQV7:A0A8C4MHP1:A0A8C4MKT7:A0A8C4MCS3		HCD
M1_3_RB1_1_8834.d	EEKVQKF	F2:11429	7	96	96	7	454.25	0.7855-0.8021	2149.6	906.481	4.8	D2EC27:A0A8C4KT44:A0A8C4MNE2:A0A8C4MD75:A0A8C4PRJ1:A0A8C4MEB5:A0A8C4MCX6:A0A8C4PRX7		HCD
M1_RB1_1_8657.d	APWPEL	F3:53096	6	96	96	6	712.363	1.2614-1.2776	0	711.359	-4.7	A0A8C4LHK7		HCD
M1_2_RB1_1_8832.d	DKYHF	F1:11351	5	96	96	5	355.171	0.7431-0.7598	2151.6	708.323	5			HCD
M2-1_RB1_1_8659.d	EQQ(+.98)GEQMAERY	F6:15279	11	96	96	11	685.29	0.9496-0.9661	3918.9	1368.56	2.4	A0A8C4LD23	Deamidation (NQ)	HCD
M1_RB1_1_8657.d	LPDKY	F3:16387	5	96	96	5	635.337	1.1836-1.1999	0	634.333	-4.4			HCD
M1_2_RB1_1_8832.d	LPDLFPADFK	F1:56086	10	96	96	10	581.813	0.8912-0.9077	25117	1161.61	3.8			HCD
M1_3_RB1_1_8834.d	HLPLP	F2:34532	5	96	96	5	576.35	1.1511-1.1674	0	575.343	-0.8			HCD
M1_2_RB1_1_8832.d	WPELE	F1:47617	5	96	96	5	673.322	1.1999-1.2161	0	672.312	4.1			HCD
M1_2_RB1_1_8832.d	KVVQD	F1:3354	5	96	96	5	588.338	1.1151-1.1314	0	587.328	4.3			HCD
M1_2_RB1_1_8832.d	SPFLLKT	F1:41960	7	96	96	7	403.246	0.7501-0.7667	0	804.475	4.4	A0A8C4MKR0:A0A8C4MME7		HCD
M1_RB1_1_8657.d	KPKLAKPK	F3:3216	8	96	96	8	455.316	0.8381-0.8546	250.72	908.617	0.8			HCD
M1_RB1_1_8657.d	EPPYS	F3:12695	5	96	96	5	592.261	1.0837-1.1001	0	591.254	0.4			HCD
M1_RB1_1_8657.d	LGADKYF	F3:33639	7	96	96	7	407.209	0.7737-0.7903	3995.1	812.407	-3.4	A0A8C4LEB1		HCD
M1_3_RB1_1_8834.d	AENYLGADKYFHA	F2:39060	13	96	96	13	749.856	1.0209-1.0373	7409.9	1497.69	5.2	A0A8C4LEB1:A0A8C4MGQ5		HCD
M1_2_RB1_1_8832.d	M(+42.01)LKLF	F1:59146	5	96	96	5	693.403	1.2823-1.2985	0	692.393	3.9		Acetylation (N-term)	HCD
M1_RB1_1_8657.d	ELEKKF	F3:13570	6	96	96	6	397.226	0.7577-0.7744	0	792.438	0	A0A8C4MXV1		HCD
M1_2_RB1_1_8832.d	SLTDKLELTKEEK	F1:28826	13	96	96	13	511.953	0.8090-0.8256	1455.2	1532.83	5.6	A0A8C4LTE2:A0A8C4M6N0:A0A8C4PQ06:A0A8C4M9C8:A0A8C4M5V6:A0A8C4MUK2		HCD
M2-1_3_RB1_1_8839.d	DDKLLK	F5:8073	6	96	96	6	366.219	0.7431-0.7598	1830.5	730.423	2.8			HCD
M1_2_RB1_1_8832.d	NPGLHLLL	F1:54347	8	96	96	8	438.769	0.8111-0.8277	913.3	875.523	0.3	A0A8C4LW79:A0A8C4LTV0		HCD
M1_3_RB1_1_8834.d	EANYLGADKYFHA	F2:39213	13	96	96	13	749.856	1.0168-1.0332	7409.9	1497.69	5.2	A0A8C4LEB1:A0A8C4MGQ5		HCD
M2-1_3_RB1_1_8839.d	HESTNLSQEKYK	F5:6268	12	96	96	12	732.361	1.0107-1.0271	11020	1462.71	2.2	B7VGF9:C1L3G3:A0A8C4MHP1:A0A8C4MKT7:A0A8C4MCS3		HCD
M1_3_RB1_1_8834.d	SPLPDLFPADFK	F2:57091	12	96	96	12	673.855	0.9352-0.9517	16693	1345.69	3.3	A0A8C4L6A6		HCD
M2-1_3_RB1_1_8839.d	M(+42.01)EVKPPP	F5:26671	7	96	96	7	839.432	1.2810-1.2971	0	838.426	-0.9	A0A8C4PVE1	Acetylation (N-term)	HCD
M2-1_2_RB1_1_8837.d	DRLEE	F4:4486	5	96	96	5	661.317	1.1721-1.1884	0	660.308	3.2			HCD
M1_RB1_1_8657.d	EDGHVKV	F3:8540	7	96	96	7	392.204	0.7522-0.7688	946.82	782.392	0.8			HCD
M1_3_RB1_1_8834.d	DGSKLKL	F2:21665	7	96	96	7	380.733	0.7549-0.7716	0	759.449	3.3	A0A8C4PKP7		HCD
M1_2_RB1_1_8832.d	LPDKY	F1:16278	5	96	96	5	635.341	1.1945-1.2107	0	634.333	2.2			HCD
M1_3_RB1_1_8834.d	KLLPTQ	F2:22921	6	96	96	6	699.441	1.2513-1.2675	0	698.433	1.4	A0A8C4LD23:A0A8C4ML69:A0A8C4PQX9:A0A8C4MA26:A0A8C4MDS9		HCD
M1_RB1_1_8657.d	HESTNLSQEK	F3:5104	10	96	96	10	586.782	0.8822-0.8988	1753.5	1171.55	2	B7VGF9:C1L3G3		HCD
M2-1_RB1_1_8659.d	VEDLKKV	F6:20216	7	96	96	7	415.754	0.7681-0.7848	427.82	829.491	2.2			HCD
M1_RB1_1_8657.d	WPELE	F3:46660	5	96	96	5	673.318	1.2114-1.2276	0	672.312	-1			HCD
M1_RB1_1_8657.d	PPPPPPP	F3:19365	7	96	96	7	698.382	1.2019-1.2182	0	697.38	-6.8	A0A8C4MTS8:A0A8C4LUM8:A0A8C4KXX4:A0A8C4M9E1:A0A8C4M3B4:A0A8C4LMY3:A0A8C4LNL1:A0A8C4LAX9:A0A8C4L5S0:A0A8C4LV13:A0A8C4LX24:A0A8C4LYB5:A0A8C4MZE5:A0A8C4LIZ6:A0A8C4LIA5:A0A8C4MVP1:A0A8C4MF50:A0A8C4MIB0:A0A8C4M7H9:A0A8C4MP75:A0A8C4L1M4:A0A8C4L0M4:A0A8C4MG23:A0A8C4MAY6:A0A8C4LUX7:A0A8C4NB56:A0A8C4MTY2:A0A8C4N2U9:A0A8C4LIL0:A0A8C4LI36:A0A8C4LI35:A0A8C4MLD5:A0A8C4MJU3:A0A8C4MMK2:A0A8C4PSM7:A0A8C4MLT9:A0A…		HCD
M2-1_2_RB1_1_8837.d	PPPPPP	F4:13100	6	96	96	6	601.335	1.1511-1.1674	0	600.327	1.8	A0A8C4MTS8:A0A8C4LUM8:A0A8C4KXX4:A0A8C4M9E1:A0A8C4M3B4:A0A8C4LMY3:A0A8C4LNL1:A0A8C4LAX9:A0A8C4L5S0:A0A8C4LV13:A0A8C4LX24:A0A8C4LYB5:A0A8C4MZE5:A0A8C4LIZ6:A0A8C4LIA5:A0A8C4MVP1:A0A8C4MF50:A0A8C4MIB0:A0A8C4M7H9:A0A8C4MP75:A0A8C4L1M4:A0A8C4L0M4:A0A8C4MG23:A0A8C4MAY6:A0A8C4LUX7:A0A8C4NB56:A0A8C4MTY2:A0A8C4N2U9:A0A8C4LIL0:A0A8C4LI36:A0A8C4LI35:A0A8C4MLD5:A0A8C4MJU3:A0A8C4MMK2:A0A8C4PSM7:A0A8C4MLT9:A0A…		HCD
M2-1_3_RB1_1_8839.d	EELKKL	F5:9727	6	96	96	6	380.234	0.7334-0.7501	448.38	758.454	0	A0A8C4N038:A0A8C4MYZ5:A0A8C4MWY8:A0A8C4N6K9:A0A8C4LTK2:A0A8C4LSJ3:A0A8C4LU33:A0A8C4KV50:A0A8C4MJ46:A0A8C4MJ21:A0A8C4PSI7:A0A8C4MJG8:A0A8C4PSI4		HCD
M1_3_RB1_1_8834.d	APPPPPPP	F2:23285	8	96	96	8	769.421	1.2621-1.2783	0	768.417	-4.5	A0A8C4MTS8:A0A8C4LUM8:A0A8C4KXX4:A0A8C4M9E1:A0A8C4M3B4:A0A8C4LMY3:A0A8C4LNL1:A0A8C4LAX9:A0A8C4MD96:A0A8C4L5S0:A0A8C4LV13:A0A8C4LX24:A0A8C4LYB5:A0A8C4MZE5:A0A8C4LIZ6:A0A8C4LIA5:A0A8C4MVP1:A0A8C4MF50:A0A8C4MIB0:A0A8C4M7H9:A0A8C4MP75:A0A8C4L1M4:A0A8C4L0M4:A0A8C4MG23:A0A8C4MAY6:A0A8C4LUX7:A0A8C4NB56:A0A8C4MTY2:A0A8C4N2U9:A0A8C4LIL0:A0A8C4LI36:A0A8C4LI35:A0A8C4MLD5:A0A8C4MJU3:A0A8C4MMK2:A0A8C4PSM7:A0A…		HCD
M1_3_RB1_1_8834.d	GPPTKKL	F2:6987	7	96	96	7	370.737	0.7313-0.7480	1680.8	739.459	1.5	A0A8C4L8E3		HCD
M1_RB1_1_8657.d	LDQNQQ(+.98)QPTEQ	F3:9730	11	96	96	11	665.296	0.9146-0.9311	2188.4	1328.58	-5.1	A0A8C4LSJ3:A0A8C4LU33:A0A8C4MQW4:A0A8C4PU43:A0A8C4LD35	Deamidation (NQ)	HCD
M1_3_RB1_1_8834.d	HESTNLS(+79.97)QEKYK	F2:10600	12	96	96	12	772.344	1.0373-1.0537	251380	1542.67	1.2	B7VGF9:C1L3G3:A0A8C4MHP1:A0A8C4MKT7:A0A8C4MCS3	Phosphorylation (STY)	HCD
M1_RB1_1_8657.d	KPEFDR	F3:6514	6	96	96	6	396.207	0.7494-0.7660	290.87	790.397	3.1			HCD
M1_2_RB1_1_8832.d	SLSSKLR	F1:11477	7	96	96	7	395.745	0.7757-0.7924	5007.1	789.471	6.5	A0A8C4MSR3:A0A8C4N8C5:A0A8C4LSJ3:A0A8C4LU33		HCD
M2-1_2_RB1_1_8837.d	EEERPPL	F4:18349	7	96	96	7	435.222	0.8477-0.8643	250.11	868.429	0	A0A8C4LAH0		HCD
M2-1_3_RB1_1_8839.d	KHESTNLSQEKY	F5:7520	12	96	96	12	732.363	1.0018-1.0182	2507.5	1462.71	3.8	B7VGF9:C1L3G3		HCD
M1_RB1_1_8657.d	VPVH	F3:4190	4	96	96	4	451.268	0.9874-1.0038	0	450.259	3.4			HCD
M1_RB1_1_8657.d	HESTNLS(+79.97)QEKYK	F3:10547	12	96	96	12	772.343	1.0455-1.0619	241450	1542.67	0.1	B7VGF9:C1L3G3:A0A8C4MHP1:A0A8C4MKT7:A0A8C4MCS3	Phosphorylation (STY)	HCD
M1_2_RB1_1_8832.d	EEKHHLK	F1:1373	7	96	96	7	460.752	0.7806-0.7972	72.506	919.487	3.2	B7VGF9		HCD
M2-1_3_RB1_1_8839.d	DN(+.98)GLSAAARKQ	F5:9028	11	96	96	11	566.294	0.8891-0.9056	2142	1130.57	5.4	A0A8C4MP75:A0A8C4LZI7:A0A8C4LSX9:A0A8C4LQG6:A0A8C4LSB3:A0A8C4LRV3	Deamidation (NQ)	HCD
M1_RB1_1_8657.d	DPNHFRPR	F3:8559	8	96	96	8	519.767	0.8629-0.8795	23882	1037.52	4.2	A0A8C4LEB1		HCD
M2-1_3_RB1_1_8839.d	ELTKEE	F5:3913	6	96	96	6	748.372	1.2567-1.2729	0	747.365	-0.1	A0A8C4LTE2		HCD
M2-1_2_RB1_1_8837.d	K(+42.01)DRLEE	F4:17173	6	96	96	6	416.214	0.7647-0.7813	2954.5	830.413	-1.2		Acetylation (K)	HCD
M1_2_RB1_1_8832.d	HPELLQ	F1:20113	6	96	96	6	736.4	1.2621-1.2783	0	735.391	1.9	P86272:C3W972:A0A8C4PJH0		HCD
M1_2_RB1_1_8832.d	DSPFLK	F1:30178	6	96	96	6	706.38	1.2229-1.2391	0	705.37	4.7			HCD
M1_RB1_1_8657.d	KVVQD	F3:3248	5	96	96	5	588.335	1.1253-1.1416	0	587.328	-0.9			HCD
M1_2_RB1_1_8832.d	PPLKLKP	F1:25038	7	96	96	7	396.772	0.7931-0.8097	432.88	791.527	3.3			HCD
M2-1_2_RB1_1_8837.d	LQ(+.98)LTKEEKLYKL	F4:25492	12	96	96	12	502.967	0.8090-0.8256	788.94	1505.87	6.1	A0A8C4M7I4:A0A8C4LTE2:A0A8C4LBN5	Deamidation (NQ)	HCD
M1_3_RB1_1_8834.d	ELEELH	F2:20322	6	96	96	6	769.374	1.2776-1.2938	0	768.365	2.1			HCD
M1_3_RB1_1_8834.d	SPVKTL	F2:16422	6	96	96	6	644.398	1.1863-1.2026	0	643.39	-0.4			HCD
M2-1_RB1_1_8659.d	KHESTNLSQEKY	F6:7529	12	96	96	12	732.36	1.0100-1.0264	2811.8	1462.71	-0.2	B7VGF9:C1L3G3		HCD
M1_RB1_1_8657.d	APARPPPGGPGASAPLPR	F3:24758	18	96	96	18	555.979	0.8739-0.8905	73572	1664.91	3.4	A0A8C4N5V1:A0A8C4N1C2:A0A8C4PJ30:A0A8C4M4P4:A0A8C4N8C5:A0A8C4LUX7:A0A8C4M1X1:A0A8C4LF53:A0A8C4LF38:A0A8C4LBJ9:A0A8C4LGH9:A0A8C4L2K7:A0A8C4PQY9		HCD
M1_RB1_1_8657.d	DEFRKL	F3:19377	6	96	96	6	404.221	0.7681-0.7848	565.65	806.429	-2.2			HCD
M1_3_RB1_1_8834.d	ERFVQDLSK	F2:41207	9	96	96	9	561.302	0.9001-0.9167	2253.8	1120.59	2.2			HCD
M1_RB1_1_8657.d	EDGPKFL	F3:37763	7	96	96	7	403.206	0.7473-0.7640	1040.6	804.402	-5.6	A0A8C4L5X9		HCD
M2-1_2_RB1_1_8837.d	LLEELK	F4:23806	6	96	96	6	744.445	1.2789-1.2951	0	743.443	-6.9	A0A8C4PJR0:A0A8C4KUH1:A0A8C4KVX9		HCD
M1_2_RB1_1_8832.d	LPLSPM(+15.99)	F1:31648	6	96	96	6	673.359	1.2330-1.2493	0	672.352	0.2	A0A8C4LD23	Oxidation (M)	HCD
M1_2_RB1_1_8832.d	KVVQD	F1:3307	5	96	96	5	588.337	1.1130-1.1293	0	587.328	3.9			HCD
M2-1_RB1_1_8659.d	M(+42.01)DQ(+.98)EDKAFKQ	F6:21746	10	96	96	10	641.786	0.9620-0.9785	367.6	1281.55	2.6		Acetylation (N-term); Deamidation (NQ)	HCD
M1_RB1_1_8657.d	N(+42.01)PPKAPSKKE	F3:7472	10	96	96	10	569.318	0.8712-0.8877	2479.5	1136.62	2.3	A0A8C4M2F8:A0A8C4PP55:A0A8C4M526:A0A8C4PSX3	Acetylation (N-term)	HCD
M2-1_RB1_1_8659.d	LPDKY	F6:13298	5	96	96	5	635.337	1.2134-1.2297	0	634.333	-4.3			HCD
M1_RB1_1_8657.d	EN(+.98)YKKKL	F3:8254	7	96	96	7	462.265	0.8159-0.8325	0	922.512	2.8		Deamidation (NQ)	HCD
M2-1_RB1_1_8659.d	DAQDKLY	F6:16375	7	96	96	7	426.709	0.7695-0.7861	37974	851.403	1.6	A0A8C4MSR3:A0A8C4M4P4		HCD
M1_RB1_1_8657.d	TPKKPK	F3:1361	6	96	96	6	349.73	0.7612-0.7778	1419.8	697.449	-4.3	A0A8C4MPW1:A0A8C4MUI6		HCD
M1_RB1_1_8657.d	AEEKKKKKL	F3:1342	9	95	95	9	551.354	0.8781-0.8946	1394.1	1100.69	2.3	A0A8C4LPN9:A0A8C4MD96:A0A8C4MLY4:A0A8C4MMG4:A0A8C4LYI3:A0A8C4M135:A0A8C4M712:A0A8C4MP75:A0A8C4L946:A0A8C4LA58:A0A8C4L2G1:A0A8C4L6W9:A0A8C4MGD3:A0A8C4LRW5:A0A8C4KUB0:A0A8C4PS52:A0A8C4L727:A0A8C4L5Z6:A0A8C4M1Y3:A0A8C4M2V3:A0A8C4M099:A0A8C4M5N7:A0A8C4LZT9:A0A8C4KQK5:A0A8C4PL28:A0A8C4LLN8:A0A8C4LJP8:A0A8C4MQT7:A0A8C4MPM2:A0A8C4MNE2:A0A8C4MD75:A0A8C4PRJ1:A0A8C4MEB5:A0A8C4MCX6:A0A8C4PRX7:A0A8C4PGF3:A0A…		HCD
M2-1_2_RB1_1_8837.d	LPDKY	F4:12766	5	95	95	5	318.175	0.7049-0.7216	61792	634.333	4.1			HCD
M1_2_RB1_1_8832.d	DALKKKL	F1:8109	7	95	95	7	408.273	0.7848-0.8014	0	814.528	4.5	A0A8C4M2L2:A0A8C4LZ68:A0A8C4L9L1:A0A8C4L4M7:A0A8C4MGK0:A0A8C4M8S2:A0A8C4MCI0:A0A8C4PQM9:A0A8C4LTK2:A0A8C4LCU6:A0A8C4M524:A0A8C4LLG0		HCD
M2-1_RB1_1_8659.d	DSEKATKV	F6:2262	8	95	95	8	439.235	0.7730-0.7896	515.8	876.455	-0.5	A0A8C4N5V1:A0A8C4N1C2		HCD
M1_RB1_1_8657.d	KGNLEYK	F3:7387	7	95	95	7	426.233	0.8152-0.8318	0	850.455	-3.2			HCD
M2-1_3_RB1_1_8839.d	DDERKL	F5:4170	6	95	95	6	388.202	0.7424-0.7591	11470	774.387	4.3	A0A8C4MKZ0		HCD
M2-1_RB1_1_8659.d	DGN(+.98)KPVRM	F6:9268	8	95	95	8	459.23	0.7861-0.8028	16366	916.444	2		Deamidation (NQ)	HCD
M1_3_RB1_1_8834.d	DPLTKT	F2:9840	6	95	95	6	674.375	1.1823-1.1985	0	673.365	5.1	A0A8C4KZN3:A0A8C4L2D4		HCD
M1_3_RB1_1_8834.d	HATKGSHVKV	F2:2806	10	95	95	10	532.307	0.8650-0.8815	0	1062.59	4.8			HCD
M1_RB1_1_8657.d	PPLKLKP	F3:24798	7	95	95	7	396.771	0.7501-0.7667	2669.6	791.527	-0.2			HCD
M1_RB1_1_8657.d	DPATQPLVVPHNPVLN	F3:47439	16	95	95	16	855.966	1.1334-1.1497	54307	1709.91	4.8	D2EC27		HCD
M2-1_2_RB1_1_8837.d	EEKVQKF	F4:8802	7	95	95	7	454.249	0.7820-0.7986	3995.7	906.481	3.3	D2EC27:A0A8C4KT44:A0A8C4MNE2:A0A8C4MD75:A0A8C4PRJ1:A0A8C4MEB5:A0A8C4MCX6:A0A8C4PRX7		HCD
M1_3_RB1_1_8834.d	EPVKKL	F2:8116	6	95	95	6	713.459	1.2466-1.2627	0	712.448	4.2	A0A8C4MAC7:A0A8C4PQV7:A0A8C4MHP1:A0A8C4MKT7:A0A8C4MCS3		HCD
M1_3_RB1_1_8834.d	DLKQEKP	F2:4718	7	95	95	7	429.241	0.8346-0.8512	198.16	856.465	1.5	A0A8C4N279:A0A8C4L6A6:A0A8C4PSY6:A0A8C4MMW0		HCD
M1_3_RB1_1_8834.d	HESTNLS(+79.97)QEKYK	F2:10805	12	95	95	12	772.344	1.0469-1.0633	251380	1542.67	1.2	B7VGF9:C1L3G3:A0A8C4MHP1:A0A8C4MKT7:A0A8C4MCS3	Phosphorylation (STY)	HCD
M1_3_RB1_1_8834.d	NPGLHL	F2:33604	6	95	95	6	650.361	1.2256-1.2418	0	649.355	-1			HCD
M2-1_3_RB1_1_8839.d	LPPPPP	F5:21585	6	95	95	6	617.363	1.1538-1.1701	0	616.358	-4.5	A0A8C4M9E1:A0A8C4M3B4:A0A8C4LAX9:A0A8C4L5S0:A0A8C4LV13:A0A8C4M4P4:A0A8C4LX24:A0A8C4LYB5:A0A8C4LIZ6:A0A8C4MVP1:A0A8C4MP75:A0A8C4L1M4:A0A8C4L0M4:A0A8C4MAY6:A0A8C4M0R7:A0A8C4LUX7:A0A8C4NB56:A0A8C4MTY2:A0A8C4N2U9:A0A8C4LRB2:A0A8C4LSK6:A0A8C4MLD5:A0A8C4MJU3:A0A8C4MMK2:A0A8C4PSM7:A0A8C4MLT9:A0A8C4PSM5:A0A8C4L7E4:A0A8C4LKB4:A0A8C4LJ14:A0A8C4LL04:A0A8C4N944:A0A8C4MX71:A0A8C4MZF3:A0A8C4MX61:A0A8C4MXW9:A0A…		HCD
M1_3_RB1_1_8834.d	ERFVQDLSK	F2:41158	9	95	95	9	561.302	0.9015-0.9180	2253.8	1120.59	2.2			HCD
M2-1_3_RB1_1_8839.d	WPELE	F5:29844	5	95	95	5	673.322	1.1904-1.2067	0	672.312	4.2			HCD
M1_3_RB1_1_8834.d	KVVQD	F2:3308	5	95	95	5	588.337	1.1130-1.1293	0	587.328	3.3			HCD
M1_RB1_1_8657.d	HESTNLS(+79.97)QEKYK	F3:10598	12	95	95	12	772.343	1.0469-1.0633	241450	1542.67	0.1	B7VGF9:C1L3G3:A0A8C4MHP1:A0A8C4MKT7:A0A8C4MCS3	Phosphorylation (STY)	HCD
M1_2_RB1_1_8832.d	LEDDTKVL	F1:33794	8	95	95	8	466.752	0.8138-0.8304	630.77	931.486	4.4			HCD
M2-1_RB1_1_8659.d	A(+42.01)DKEKKKKESL	F6:2008	11	95	95	11	449.262	0.7522-0.7688	761.47	1344.76	2.2	A0A8C4PPH6:A0A8C4L1V5:A0A8C4L4B8:A0A8C4LAH0:A0A8C4MZE5:A0A8C4L946:A0A8C4LA58:A0A8C4L2G1:A0A8C4L6W9:A0A8C4MEI5:A0A8C4MEJ9:A0A8C4M6Y4:A0A8C4M530:A0A8C4MEG2:A0A8C4PKI3:A0A8C4PS52:A0A8C4L727:A0A8C4L5Z6:A0A8C4KQK5:A0A8C4MIZ0:A0A8C4MNB3:A0A8C4MP43:A0A8C4MAG6:A0A8C4M250:A0A8C4N115:A0A8C4MZ04:A0A8C4MB40:A0A8C4MK30:A0A8C4ML69:A0A8C4PQX9:A0A8C4MA26:A0A8C4MDS9:A0A8C4KXZ8	Acetylation (N-term)	HCD
M2-1_2_RB1_1_8837.d	DDERKL	F4:4222	6	95	95	6	388.202	0.7327-0.7494	11269	774.387	2.5	A0A8C4MKZ0		HCD
M1_3_RB1_1_8834.d	EDGPKFL	F2:38146	7	95	95	7	403.209	0.7390-0.7556	1110.5	804.402	1.7	A0A8C4L5X9		HCD
M1_RB1_1_8657.d	SLTDKLELTKEEK	F3:28583	13	95	95	13	511.948	0.8180-0.8346	652.73	1532.83	-4.5	A0A8C4LTE2:A0A8C4M6N0:A0A8C4PQ06:A0A8C4M9C8:A0A8C4M5V6:A0A8C4MUK2		HCD
M1_3_RB1_1_8834.d	PPPPPPP	F2:19650	7	95	95	7	698.386	1.1904-1.2067	0	697.38	-1.8	A0A8C4MTS8:A0A8C4LUM8:A0A8C4KXX4:A0A8C4M9E1:A0A8C4M3B4:A0A8C4LMY3:A0A8C4LNL1:A0A8C4LAX9:A0A8C4L5S0:A0A8C4LV13:A0A8C4LX24:A0A8C4LYB5:A0A8C4MZE5:A0A8C4LIZ6:A0A8C4LIA5:A0A8C4MVP1:A0A8C4MF50:A0A8C4MIB0:A0A8C4M7H9:A0A8C4MP75:A0A8C4L1M4:A0A8C4L0M4:A0A8C4MG23:A0A8C4MAY6:A0A8C4LUX7:A0A8C4NB56:A0A8C4MTY2:A0A8C4N2U9:A0A8C4LIL0:A0A8C4LI36:A0A8C4LI35:A0A8C4MLD5:A0A8C4MJU3:A0A8C4MMK2:A0A8C4PSM7:A0A8C4MLT9:A0A…		HCD
M1_2_RB1_1_8832.d	VERHNKDRKV	F1:3153	10	95	95	10	427.579	0.7091-0.7258	2717.4	1279.71	3.3			HCD
M1_RB1_1_8657.d	DPLTKT	F3:9785	6	95	95	6	674.374	1.1918-1.2080	0	673.365	2.3	A0A8C4KZN3:A0A8C4L2D4		HCD
M1_3_RB1_1_8834.d	HPLHFL	F2:38232	6	95	95	6	382.216	0.7667-0.7834	4144	762.418	0.8			HCD
M1_2_RB1_1_8832.d	DTVKKL	F1:8842	6	95	95	6	352.223	0.7223-0.7390	2586.2	702.428	5.6	A0A8C4L1V5:A0A8C4L4B8:A0A8C4LYI3:A0A8C4M135:A0A8C4M712		HCD
M1_2_RB1_1_8832.d	VM(+15.99)PFLK	F1:31413	6	95	95	6	750.423	1.2803-1.2964	0	749.415	1	D2EC27	Oxidation (M)	HCD
M1_3_RB1_1_8834.d	PPPPPKY	F2:23416	7	95	95	7	795.441	1.2756-1.2917	0	794.433	1.4	A0A8C4MG23:A0A8C4LIL0:A0A8C4LI36:A0A8C4LRB2:A0A8C4LSK6:A0A8C4LC31:A0A8C4MYX8:A0A8C4MU64:A0A8C4PU53:A0A8C4L727:A0A8C4L5Z6		HCD
M1_RB1_1_8657.d	APARPPPGGPGALAPLPR	F3:35906	18	95	95	18	564.662	0.8643-0.8808	39604	1690.96	0.3	A0A8C4N5V1:A0A8C4N1C2:A0A8C4M4P4:A0A8C4N8C5:A0A8C4LUX7:A0A8C4MNZ6:A0A8C4MP05:A0A8C4M1X1:A0A8C4N3Z1:A0A8C4LF53:A0A8C4LF38:A0A8C4LBJ9:A0A8C4LGH9:A0A8C4PQY9		HCD
M2-1_RB1_1_8659.d	EKEQ(+.98)LNVSSK	F6:9234	10	95	95	10	581.801	0.8946-0.9111	1763.3	1161.59	-1.1	A0A8C4PTH7	Deamidation (NQ)	HCD
M2-1_RB1_1_8659.d	EELKWK	F6:16449	6	95	95	6	416.733	0.7924-0.8090	1279.1	831.449	3.4			HCD
M1_RB1_1_8657.d	SPFLLKT	F3:41210	7	95	95	7	403.247	0.7598-0.7764	0	804.475	5.5	A0A8C4MKR0:A0A8C4MME7		HCD
M1_2_RB1_1_8832.d	DTKELVSSKVS	F1:20530	11	95	95	11	596.828	0.9187-0.9352	262.15	1191.63	5.2	A0A8C4LD25:A0A8C4PSY6:A0A8C4MMW0		HCD
M1_RB1_1_8657.d	DN(+.98)KVLRF	F3:33362	7	95	95	7	446.747	0.7931-0.8097	584.21	891.481	-3.2		Deamidation (NQ)	HCD
M1_RB1_1_8657.d	S(+79.97)EEKVQKF	F3:15721	8	95	95	8	537.75	0.8470-0.8636	7936.9	1073.48	5.2	D2EC27:A0A8C4KT44:A0A8C4MNE2:A0A8C4MD75:A0A8C4PRJ1:A0A8C4MEB5:A0A8C4MCX6:A0A8C4PRX7	Phosphorylation (STY)	HCD
M1_3_RB1_1_8834.d	DKALKKF	F2:9004	7	95	95	7	425.265	0.7667-0.7834	0	848.512	3.4	A0A8C4L1G5		HCD
M2-1_RB1_1_8659.d	DAAQGRPGGAW	F6:19833	11	95	95	11	543.261	0.8201-0.8367	17235	1084.5	3.1			HCD
M1_RB1_1_8657.d	APARPPPGGPGASAPLRP	F3:24832	18	95	95	18	555.979	0.8994-0.9160	73572	1664.91	3.4	A0A8C4N5V1:A0A8C4N1C2:A0A8C4PJ30:A0A8C4M4P4:A0A8C4N8C5:A0A8C4LUX7:A0A8C4M1X1:A0A8C4LF53:A0A8C4LF38:A0A8C4LBJ9:A0A8C4LGH9:A0A8C4L2K7:A0A8C4PQY9		HCD
M1_RB1_1_8657.d	DTKELVSSKVS	F3:20338	11	95	95	11	596.828	0.9256-0.9421	166.9	1191.63	5.2	A0A8C4LD25:A0A8C4PSY6:A0A8C4MMW0		HCD
M1_RB1_1_8657.d	SLSSKLR	F3:11251	7	95	95	7	395.743	0.7889-0.8055	5228.2	789.471	0.8	A0A8C4MSR3:A0A8C4N8C5:A0A8C4LSJ3:A0A8C4LU33		HCD
M1_RB1_1_8657.d	DPNHFRPR	F3:8729	8	95	95	8	346.844	0.7049-0.7216	0	1037.52	-6.3	A0A8C4LEB1		HCD
M1_2_RB1_1_8832.d	DDLSKV	F1:14755	6	95	95	6	676.35	1.1931-1.2094	0	675.344	-1.3			HCD
M2-1_RB1_1_8659.d	WGQEN(+.98)GHVKV	F6:10624	10	95	95	10	577.782	0.8864-0.9029	0	1153.55	-1.8	A0A8C4PK97	Deamidation (NQ)	HCD
M2-1_2_RB1_1_8837.d	WPELE	F4:29440	5	95	95	5	673.323	1.1891-1.2053	0	672.312	5.3			HCD
M1_3_RB1_1_8834.d	LDAQKKKL	F2:3217	8	95	95	8	472.3	0.8408-0.8574	0	942.586	-0.4	A0A8C4PI67:A0A8C4LYF5:A0A8C4LBK3		HCD
M2-1_3_RB1_1_8839.d	AKDMW	F5:19409	5	95	95	5	650.299	1.1850-1.2012	0	649.289	3.2			HCD
M2-1_3_RB1_1_8839.d	DGN(+.98)KPVRM	F5:9348	8	95	95	8	459.231	0.7792-0.7958	16044	916.444	4.4		Deamidation (NQ)	HCD
M1_3_RB1_1_8834.d	VGLGKKKKV	F2:2936	9	95	95	9	478.834	0.8457-0.8622	0	955.654	-1.9	A0A8C4L9Q0:A0A8C4L4N3		HCD
M2-1_2_RB1_1_8837.d	EELKWK	F4:16505	6	95	95	6	416.733	0.7827-0.7993	1867.3	831.449	3.3			HCD
M2-1_RB1_1_8659.d	DN(+.98)GLSAAARKQ	F6:8976	11	95	95	11	566.292	0.8953-0.9118	2189.7	1130.57	0.6	A0A8C4MP75:A0A8C4LZI7:A0A8C4LSX9:A0A8C4LQG6:A0A8C4LSB3:A0A8C4LRV3	Deamidation (NQ)	HCD
M2-1_2_RB1_1_8837.d	PPPPPP	F4:12621	6	95	95	6	601.335	1.1273-1.1436	0	600.327	1.8	A0A8C4MTS8:A0A8C4LUM8:A0A8C4KXX4:A0A8C4M9E1:A0A8C4M3B4:A0A8C4LMY3:A0A8C4LNL1:A0A8C4LAX9:A0A8C4L5S0:A0A8C4LV13:A0A8C4LX24:A0A8C4LYB5:A0A8C4MZE5:A0A8C4LIZ6:A0A8C4LIA5:A0A8C4MVP1:A0A8C4MF50:A0A8C4MIB0:A0A8C4M7H9:A0A8C4MP75:A0A8C4L1M4:A0A8C4L0M4:A0A8C4MG23:A0A8C4MAY6:A0A8C4LUX7:A0A8C4NB56:A0A8C4MTY2:A0A8C4N2U9:A0A8C4LIL0:A0A8C4LI36:A0A8C4LI35:A0A8C4MLD5:A0A8C4MJU3:A0A8C4MMK2:A0A8C4PSM7:A0A8C4MLT9:A0A…		HCD
M2-1_2_RB1_1_8837.d	EEEL	F4:11853	4	95	95	4	519.232	1.0619-1.0783	0	518.222	4.8			HCD
M2-1_2_RB1_1_8837.d	LDQ(+.98)ASKQLTPQ	F4:16402	11	95	95	11	615.319	0.9290-0.9455	751.32	1228.63	-5.7	A0A8C4LA77	Deamidation (NQ)	HCD
M1_2_RB1_1_8832.d	EKVQKYK	F1:4344	7	95	95	7	461.774	0.8291-0.8457	108.64	921.528	4.5			HCD
M2-1_3_RB1_1_8839.d	EN(+.98)VETSKKW	F5:13153	9	95	95	9	561.274	0.8532-0.8698	2193.3	1120.54	-5.4	A0A8C4MES9	Deamidation (NQ)	HCD
M2-1_2_RB1_1_8837.d	LPPPTE	F4:14446	6	95	95	6	653.349	1.1884-1.2046	0	652.343	-1.8			HCD
M1_RB1_1_8657.d	EELLR	F3:20272	5	95	95	5	659.374	1.2256-1.2418	0	658.365	3.3			HCD
M2-1_2_RB1_1_8837.d	DEDKYL	F4:18244	6	95	95	6	391.683	0.7556-0.7723	62609	781.349	2.4	A0A8C4LXL5		HCD
M1_2_RB1_1_8832.d	LQ(+.98)LTKEEKLYKL	F1:35285	12	95	95	12	502.966	0.8132-0.8298	7028.9	1505.87	3.6	A0A8C4M7I4:A0A8C4LTE2:A0A8C4LBN5	Deamidation (NQ)	HCD
M1_2_RB1_1_8832.d	DPATQPLVPVHNPVLN	F1:48472	16	95	95	16	855.968	1.0940-1.1103	46222	1709.91	7	D2EC27		HCD
M1_RB1_1_8657.d	EANYLGADKYF	F3:43908	11	95	95	11	645.804	0.9428-0.9593	1948.2	1289.59	0.8	A0A8C4LEB1:A0A8C4MGQ5		HCD
M1_2_RB1_1_8832.d	LPVLEKN	F1:27144	7	95	95	7	406.747	0.7681-0.7848	3018	811.48	-0.4			HCD
M2-1_3_RB1_1_8839.d	LPPPYD	F5:20439	6	95	95	6	701.352	1.2215-1.2378	0	700.343	1.9			HCD
M2-1_RB1_1_8659.d	EDGHVKV	F6:5922	7	95	95	7	392.204	0.7466-0.7633	4653.3	782.392	2.5			HCD
M1_2_RB1_1_8832.d	DN(+.98)SLLRL	F1:50080	7	95	95	7	416.233	0.7730-0.7896	291.7	830.45	3.1		Deamidation (NQ)	HCD
M1_3_RB1_1_8834.d	LPVLR	F2:28686	5	95	95	5	597.409	1.1796-1.1958	0	596.401	0.6			HCD
M2-1_3_RB1_1_8839.d	KGNLEYK	F5:4861	7	95	95	7	426.236	0.7882-0.8049	2222	850.455	2.2			HCD
M1_RB1_1_8657.d	KGNLEYKEVVPLNTEK	F3:31062	16	95	95	16	621.007	0.8870-0.9036	5291.8	1860	0.4	P86272:C3W972		HCD
M2-1_3_RB1_1_8839.d	DDDWLR	F5:25681	6	95	95	6	410.187	0.7882-0.8049	0	818.356	4.7	A0A8C4M1V4:A0A8C4M313:A0A8C4M305		HCD
M1_3_RB1_1_8834.d	LPTQTSQ	F2:10319	7	95	95	7	774.397	1.2762-1.2924	0	773.392	-3.1	A0A8C4LD23		HCD
M1_2_RB1_1_8832.d	SPLPN(+.98)LFPADFK	F1:57067	12	95	95	12	673.855	0.9338-0.9503	13983	1345.69	2.2	A0A8C4LDF2:A0A8C4LHM4:A0A8C4LGD8	Deamidation (NQ)	HCD
M1_3_RB1_1_8834.d	VEERPLKV	F2:30675	8	95	95	8	485.292	0.8166-0.8332	466.84	968.565	3.8			HCD
M1_2_RB1_1_8832.d	KLALL	F1:42457	5	95	95	5	557.405	1.1470-1.1633	0	556.395	4.7			HCD
M1_2_RB1_1_8832.d	FVEKKAKLEHC	F1:18370	11	95	95	11	444.575	0.7515-0.7681	1428.2	1330.71	-3.2	A0A8C4LZJ8:A0A8C4M8A7:A0A8C4PT15		HCD
M1_RB1_1_8657.d	M(+42.01)NHTFQTSVSGVH	F3:37421	13	95	95	13	743.841	1.0305-1.0469	949.42	1485.67	0.8		Acetylation (N-term)	HCD
M1_RB1_1_8657.d	S(+79.97)EEKVQKF	F3:15807	8	95	95	8	537.75	0.8505-0.8671	7936.9	1073.48	5.2	D2EC27:A0A8C4KT44:A0A8C4MNE2:A0A8C4MD75:A0A8C4PRJ1:A0A8C4MEB5:A0A8C4MCX6:A0A8C4PRX7	Phosphorylation (STY)	HCD
M2-1_3_RB1_1_8839.d	M(+42.01)DKL	F5:26586	4	95	95	4	548.275	1.1321-1.1484	0	547.268	0.3		Acetylation (N-term)	HCD
M2-1_3_RB1_1_8839.d	EEVVKKL	F5:12008	7	95	95	7	422.763	0.7653-0.7820	252.81	843.506	5.5			HCD
M1_RB1_1_8657.d	EKEKLKKL	F3:5171	8	95	95	8	508.329	0.8477-0.8643	1323.4	1014.64	0.2	A0A8C4M3B4:A0A8C4MLY4:A0A8C4MMG4:A0A8C4MHC3:A0A8C4MHB5:A0A8C4MFI2:A0A8C4MWY8:A0A8C4N6K9:A0A8C4N092:A0A8C4MZN1:A0A8C4N4N8:A0A8C4MZ38:A0A8C4PVB2:A0A8C4LSJ3:A0A8C4LU33:A0A8C4LUP4:A0A8C4LX95:A0A8C4M6N0:A0A8C4PQ06:A0A8C4M9C8:A0A8C4M5V6:A0A8C4M7C4:A0A8C4N6S8:A0A8C4LFA4:A0A8C4LJQ2:A0A8C4LFL1:A0A8C4LLG2:A0A8C4MQW4:A0A8C4PU43:A0A8C4PNY0:A0A8C4MUH0		HCD
M1_2_RB1_1_8832.d	DRLEEK	F1:3133	6	95	95	6	395.208	0.7556-0.7723	718.5	788.403	-1.6	A0A8C4MSR3		HCD
M1_RB1_1_8657.d	KPPVV	F3:14179	5	95	95	5	539.356	1.0783-1.0946	0	538.348	1.6			HCD
M1_2_RB1_1_8832.d	PPPGGPGASAPLRP	F1:24836	14	95	95	14	635.852	0.9867-1.0031	5638.9	1269.68	5.1	A0A8C4N5V1:A0A8C4N1C2:A0A8C4PJ30:A0A8C4M4P4:A0A8C4N8C5:A0A8C4LBJ9:A0A8C4LGH9:A0A8C4L2K7		HCD
M1_RB1_1_8657.d	DDLVSK	F3:10972	6	95	95	6	676.348	1.2134-1.2297	0	675.344	-4.3	A0A8C4MEK9:A0A8C4MQV9		HCD
M2-1_RB1_1_8659.d	HESTNLSQEKYK	F6:6268	12	95	95	12	488.577	0.8138-0.8304	22386	1462.71	2.6	B7VGF9:C1L3G3:A0A8C4MHP1:A0A8C4MKT7:A0A8C4MCS3		HCD
M2-1_3_RB1_1_8839.d	DN(+.98)HLVRL	F5:19249	7	95	95	7	434.238	0.7771-0.7938	0	866.461	0		Deamidation (NQ)	HCD
M1_2_RB1_1_8832.d	EPVKKV	F1:4422	6	95	95	6	699.441	1.2270-1.2432	0	698.433	1.4	A0A8C4M5J3:A0A8C4M6R7:A0A8C4KZL8		HCD
M2-1_3_RB1_1_8839.d	HEGQQQREVEHQDK	F5:1158	14	95	95	14	583.271	0.8436-0.8601	0	1746.8	-6.6	D2EC27		HCD
M2-1_2_RB1_1_8837.d	LETKEEKL	F4:13065	8	95	95	8	495.281	0.8298-0.8463	33250	988.544	3.2	A0A8C4M7I4		HCD
M2-1_3_RB1_1_8839.d	PPLKLP	F5:27615	6	95	95	6	332.724	0.7626-0.7792	385.48	663.432	2.4	A0A8C4MEG2:A0A8C4LZZ3:A0A8C4MPW1:A0A8C4MUI6		HCD
M1_3_RB1_1_8834.d	TPLVKKL	F2:21234	7	95	95	7	399.777	0.7799-0.7965	99.445	797.537	3.1	A0A8C4LZ03:A0A8C4LJD7:A0A8C4LKU6		HCD
M1_2_RB1_1_8832.d	MADQ(+.98)AGSKADPED	F1:10913	13	95	95	13	668.275	0.9235-0.9400	3132.9	1334.53	4.8		Deamidation (NQ)	HCD
M1_3_RB1_1_8834.d	LLPTET	F2:28184	6	95	95	6	673.377	1.2026-1.2188	0	672.369	0.1			HCD
M2-1_2_RB1_1_8837.d	KHESTNLSQEK	F4:1826	11	95	95	11	650.831	0.9393-0.9558	774.09	1299.64	4.1	B7VGF9:C1L3G3		HCD
M1_2_RB1_1_8832.d	TPKKPK	F1:1408	6	95	95	6	349.732	0.7529-0.7695	1857.8	697.449	1.2	A0A8C4MPW1:A0A8C4MUI6		HCD
M2-1_RB1_1_8659.d	DRLEE	F6:4478	5	95	95	5	661.317	1.1843-1.2006	0	660.308	2.6			HCD
M1_3_RB1_1_8834.d	SKSRKF	F2:2113	6	95	95	6	376.725	0.7640-0.7806	0	751.434	2.6	A0A8C4LXL5		HCD
M2-1_RB1_1_8659.d	EELKWK	F6:16397	6	95	95	6	416.732	0.7931-0.8097	0	831.449	1.4			HCD
M2-1_3_RB1_1_8839.d	EELKLKKV	F5:13164	8	95	95	8	493.817	0.8360-0.8526	0	985.617	2.3	A0A8C4MHR2:A0A8C4PS80:A0A8C4PRW9:A0A8C4PMN6:A0A8C4LPE2:A0A8C4PV63		HCD
M2-1_3_RB1_1_8839.d	DPNHFRPR	F5:6318	8	95	95	8	519.767	0.8477-0.8643	9152.5	1037.52	4.1	A0A8C4LEB1		HCD
M2-1_RB1_1_8659.d	NEDPLTKT	F6:11873	8	95	95	8	459.233	0.8000-0.8166	9242.7	916.45	2.4	A0A8C4KZN3:A0A8C4L2D4		HCD
M1_2_RB1_1_8832.d	HESTNLS(+79.97)QEKYK	F1:10850	12	95	95	12	772.345	1.0250-1.0414	242750	1542.67	2.4	B7VGF9:C1L3G3:A0A8C4MHP1:A0A8C4MKT7:A0A8C4MCS3	Phosphorylation (STY)	HCD
M1_RB1_1_8657.d	DSEKPKKL	F3:4040	8	95	95	8	472.775	0.8208-0.8374	244.63	943.534	2.1	A0A8C4LML2		HCD
M1_3_RB1_1_8834.d	DLKLDLR	F2:37881	7	95	95	7	436.763	0.7910-0.8076	136.09	871.513	-0.7			HCD
M1_2_RB1_1_8832.d	GPPTKKL	F1:6950	7	95	95	7	370.738	0.7251-0.7417	1609.1	739.459	3.6	A0A8C4L8E3		HCD
M2-1_RB1_1_8659.d	DDERKL	F6:4136	6	95	95	6	388.201	0.7494-0.7660	11318	774.387	1.5	A0A8C4MKZ0		HCD
M1_2_RB1_1_8832.d	HESTNLS(+79.97)QEKYK	F1:10639	12	95	95	12	772.345	1.0339-1.0503	242750	1542.67	2.4	B7VGF9:C1L3G3:A0A8C4MHP1:A0A8C4MKT7:A0A8C4MCS3	Phosphorylation (STY)	HCD
M1_2_RB1_1_8832.d	HESTNLS(+79.97)QEKYK	F1:10771	12	95	95	12	772.345	1.0510-1.0674	242750	1542.67	2.4	B7VGF9:C1L3G3:A0A8C4MHP1:A0A8C4MKT7:A0A8C4MCS3	Phosphorylation (STY)	HCD
M2-1_3_RB1_1_8839.d	KGNLEYK	F5:4824	7	95	95	7	426.236	0.7979-0.8145	2222	850.455	2.2			HCD
M2-1_2_RB1_1_8837.d	EANYLGADKYFHA	F4:27099	13	95	95	13	749.854	1.0011-1.0175	1032.2	1497.69	2.8	A0A8C4LEB1:A0A8C4MGQ5		HCD
M2-1_RB1_1_8659.d	EEKVQKF	F6:8897	7	95	95	7	454.249	0.7889-0.8055	3974.2	906.481	3.1	D2EC27:A0A8C4KT44:A0A8C4MNE2:A0A8C4MD75:A0A8C4PRJ1:A0A8C4MEB5:A0A8C4MCX6:A0A8C4PRX7		HCD
M2-1_2_RB1_1_8837.d	PPPPPP	F4:22223	6	95	95	6	601.337	1.1545-1.1708	0	600.327	5.1	A0A8C4MTS8:A0A8C4LUM8:A0A8C4KXX4:A0A8C4M9E1:A0A8C4M3B4:A0A8C4LMY3:A0A8C4LNL1:A0A8C4LAX9:A0A8C4L5S0:A0A8C4LV13:A0A8C4LX24:A0A8C4LYB5:A0A8C4MZE5:A0A8C4LIZ6:A0A8C4LIA5:A0A8C4MVP1:A0A8C4MF50:A0A8C4MIB0:A0A8C4M7H9:A0A8C4MP75:A0A8C4L1M4:A0A8C4L0M4:A0A8C4MG23:A0A8C4MAY6:A0A8C4LUX7:A0A8C4NB56:A0A8C4MTY2:A0A8C4N2U9:A0A8C4LIL0:A0A8C4LI36:A0A8C4LI35:A0A8C4MLD5:A0A8C4MJU3:A0A8C4MMK2:A0A8C4PSM7:A0A8C4MLT9:A0A…		HCD
M1_RB1_1_8657.d	M(+42.01)NHTF	F3:35565	5	95	95	5	691.285	1.2432-1.2594	0	690.279	-2.6		Acetylation (N-term)	HCD
M1_RB1_1_8657.d	HESTNLS(+79.97)QEKYK	F3:10674	12	95	95	12	772.343	1.0578-1.0742	241450	1542.67	0.1	B7VGF9:C1L3G3:A0A8C4MHP1:A0A8C4MKT7:A0A8C4MCS3	Phosphorylation (STY)	HCD
M2-1_RB1_1_8659.d	EDQ(+.98)DKAFKQ	F6:8050	9	95	95	9	555.26	0.8684-0.8850	447.59	1108.5	0.9		Deamidation (NQ)	HCD
M1_RB1_1_8657.d	M(+42.01)(+15.99)NHTFQTSVSGVH	F3:28594	13	95	95	13	751.84	1.0421-1.0585	877.71	1501.66	1.7		Acetylation (N-term); Oxidation (M)	HCD
M1_3_RB1_1_8834.d	DDFQHRKF	F2:36200	8	95	95	8	546.762	0.8457-0.8622	124.14	1091.51	-5.6			HCD
M1_RB1_1_8657.d	LPAPLTQ	F3:34262	7	95	95	7	739.431	1.2789-1.2951	0	738.428	-5.6	A0A8C4LWI6		HCD
M2-1_RB1_1_8659.d	M(+15.99)PEDKYLKF	F6:26442	9	95	95	9	396.196	0.7278-0.7445	0	1185.57	-6.2	A0A8C4LXL5	Oxidation (M)	HCD
M2-1_RB1_1_8659.d	KHESTNLSQEK	F6:1869	11	95	95	11	650.827	0.9448-0.9613	695.89	1299.64	-1.1	B7VGF9:C1L3G3		HCD
M1_3_RB1_1_8834.d	VEPNKKV	F2:11386	7	95	95	7	407.247	0.7584-0.7751	1570.3	812.476	4.3			HCD
M1_3_RB1_1_8834.d	ETLLPK	F2:26048	6	95	95	6	700.422	1.2749-1.2911	0	699.417	-2.3	D2EC27		HCD
M1_RB1_1_8657.d	APARPPPGGPGASAPLRP	F3:24747	18	95	95	18	555.979	0.8608-0.8774	73572	1664.91	3.4	A0A8C4N5V1:A0A8C4N1C2:A0A8C4PJ30:A0A8C4M4P4:A0A8C4N8C5:A0A8C4LUX7:A0A8C4M1X1:A0A8C4LF53:A0A8C4LF38:A0A8C4LBJ9:A0A8C4LGH9:A0A8C4L2K7:A0A8C4PQY9		HCD
M1_RB1_1_8657.d	LPVHLL	F3:46758	6	95	95	6	346.23	0.7542-0.7709	4885.8	690.443	3.6	D2EC27		HCD
M1_RB1_1_8657.d	M(+42.01)(+15.99)LKLF	F3:54891	5	95	95	5	709.394	1.2843-1.3005	0	708.388	-1.9		Acetylation (N-term); Oxidation (M)	HCD
M1_2_RB1_1_8832.d	TPVTKL	F1:20066	6	95	95	6	658.413	1.2060-1.2222	0	657.406	-1.4	A0A8C4LHK7		HCD
M1_3_RB1_1_8834.d	PPPPYK	F2:31211	6	95	95	6	698.39	1.2168-1.2330	0	697.38	3.9			HCD
M2-1_2_RB1_1_8837.d	SEEKVQKF	F4:9113	8	95	95	8	497.765	0.8201-0.8367	1301.4	993.513	2.4	D2EC27:A0A8C4KT44:A0A8C4MNE2:A0A8C4MD75:A0A8C4PRJ1:A0A8C4MEB5:A0A8C4MCX6:A0A8C4PRX7		HCD
M1_3_RB1_1_8834.d	ELTKEE	F2:6018	6	95	95	6	748.376	1.2547-1.2708	0	747.365	5.5	A0A8C4LTE2		HCD
M2-1_3_RB1_1_8839.d	M(+42.01)EGAEEKKK	F5:4815	9	95	95	9	546.277	0.8808-0.8974	706.45	1090.53	6.1	A0A8C4LYI3:A0A8C4M135:A0A8C4M712	Acetylation (N-term)	HCD
M1_2_RB1_1_8832.d	HPELLQ	F1:20128	6	95	95	6	736.398	1.2378-1.2540	0	735.391	-1.2	P86272:C3W972:A0A8C4PJH0		HCD
M1_2_RB1_1_8832.d	APARPPPGGPGALAPLPR	F1:36355	18	95	95	18	564.664	0.9462-0.9627	4725.8	1690.96	4.9	A0A8C4N5V1:A0A8C4N1C2:A0A8C4M4P4:A0A8C4N8C5:A0A8C4LUX7:A0A8C4MNZ6:A0A8C4MP05:A0A8C4M1X1:A0A8C4N3Z1:A0A8C4LF53:A0A8C4LF38:A0A8C4LBJ9:A0A8C4LGH9:A0A8C4PQY9		HCD
M1_RB1_1_8657.d	KVREVK	F3:1581	6	95	95	6	379.748	0.7723-0.7889	0	757.481	0.4			HCD
M2-1_RB1_1_8659.d	EPVKKL	F6:5607	6	95	95	6	357.232	0.7431-0.7598	5840.8	712.448	2.4	A0A8C4MAC7:A0A8C4PQV7:A0A8C4MHP1:A0A8C4MKT7:A0A8C4MCS3		HCD
M1_2_RB1_1_8832.d	TVNTVLGSKLLPTQ	F1:51458	14	95	95	14	735.934	1.0141-1.0305	1124.9	1469.85	5.5	A0A8C4LD23:A0A8C4MSR3:A0A8C4ML69:A0A8C4PQX9:A0A8C4MA26:A0A8C4MDS9		HCD
M1_2_RB1_1_8832.d	M(+42.01)(+15.99)ERAETLLR	F1:31047	9	95	95	9	588.809	0.9400-0.9565	7700.4	1175.6	5.3		Acetylation (N-term); Oxidation (M)	HCD
M1_2_RB1_1_8832.d	TKENKHLVM(+15.99)	F1:26671	9	95	95	9	558.3	0.8808-0.8974	0	1114.58	3.9		Oxidation (M)	HCD
M1_2_RB1_1_8832.d	LPLL	F1:52955	4	95	95	4	455.325	1.0407-1.0571	0	454.315	4.5			HCD
M1_2_RB1_1_8832.d	PLTKT	F1:4405	5	95	95	5	559.347	1.1769-1.1931	0	558.338	4			HCD
M1_RB1_1_8657.d	APARPPPGGPGALAPLPR	F3:35741	18	95	95	18	564.662	0.9593-0.9757	6774.5	1690.96	0.8	A0A8C4N5V1:A0A8C4N1C2:A0A8C4M4P4:A0A8C4N8C5:A0A8C4LUX7:A0A8C4MNZ6:A0A8C4MP05:A0A8C4M1X1:A0A8C4N3Z1:A0A8C4LF53:A0A8C4LF38:A0A8C4LBJ9:A0A8C4LGH9:A0A8C4PQY9		HCD
M1_2_RB1_1_8832.d	TPKGEKFPSMSEA	F1:26279	13	95	95	13	704.846	0.9942-1.0107	5124.4	1407.67	5.1	A0A8C4LD23		HCD
M1_RB1_1_8657.d	HQTTMDPQSHKVLL	F3:27845	14	95	95	14	545.615	0.8291-0.8457	3430.6	1633.82	-0.8	B7VGF9:A0A8C4MBA7		HCD
M1_3_RB1_1_8834.d	APARPPPGGPGALAPLPR	F2:36408	18	95	95	18	564.664	0.8705-0.8870	40067	1690.96	3.6	A0A8C4N5V1:A0A8C4N1C2:A0A8C4M4P4:A0A8C4N8C5:A0A8C4LUX7:A0A8C4MNZ6:A0A8C4MP05:A0A8C4M1X1:A0A8C4N3Z1:A0A8C4LF53:A0A8C4LF38:A0A8C4LBJ9:A0A8C4LGH9:A0A8C4PQY9		HCD
M1_3_RB1_1_8834.d	APARPPPGGPGALAPLPR	F2:36481	18	95	95	18	564.664	0.8739-0.8905	40067	1690.96	3.6	A0A8C4N5V1:A0A8C4N1C2:A0A8C4M4P4:A0A8C4N8C5:A0A8C4LUX7:A0A8C4MNZ6:A0A8C4MP05:A0A8C4M1X1:A0A8C4N3Z1:A0A8C4LF53:A0A8C4LF38:A0A8C4LBJ9:A0A8C4LGH9:A0A8C4PQY9		HCD
M1_RB1_1_8657.d	PPKLHP	F3:7167	6	95	95	6	344.71	0.7209-0.7376	851.75	687.407	-2.4			HCD
M1_RB1_1_8657.d	DEEKNFKA	F3:10420	8	95	95	8	490.74	0.8235-0.8401	0	979.461	3.7			HCD
M2-1_2_RB1_1_8837.d	ETLLR	F4:14062	5	95	95	5	631.379	1.1823-1.1985	0	630.37	2.9			HCD
M2-1_2_RB1_1_8837.d	LEELKWK	F4:23487	7	95	95	7	473.276	0.8277-0.8443	180.25	944.533	3.6			HCD

## Sheet: Table S12
Table S12. Physicochemical characteristics of endogenous peptides by de novo in TCA precipitation (M1).
TCA precipitation (M1)	Average_pI	pH_7.4_charge	GRAVY	Mass
LELTKEEKLYLK	6.582	-0.1	-0.75	1505.87
HESTNLSQEKYK	7.136	0	-2.06667	1462.71
SPLPN(+.98)LFPADFK	6.443	0	-0.125	1345.69
DPQSHKVLL	7.21	0	-0.522222	1035.57
VKLSEADKKKV	10.034	1.9	-0.854545	1243.75
PNHFRPR	12.22	2	-2.3	922.489
LETKEEKLYL	4.598	-1.1	-0.89	1264.69
ELTKEEKLYLK	6.495	-0.1	-1.16364	1392.79
HESTNLSQEKY	5.295	-1	-1.9	1334.61
LPVHLL	7.327	0	1.8	690.443
ELTKEEKLY	4.59	-1.1	-1.41111	1151.61
LQ(+.98)LTKEEKLYKL	8.883	0.9	-0.75	1505.87
M(+42.01)ERAETLLR	6.771	0	-0.6	1159.6
EANYLGADKYFHA	5.087	-1	-0.661538	1497.69
DPNHFRPR	10.318	1	-2.45	1037.52
MADQ(+.98)AGSKADPED	3.69	-3	-1.3	1334.53
KHESTNLSQEKYK	8.957	0.9	-2.20769	1590.8
WKKATLH	10.748	2	-1	882.508
HESTNLSQEYK	5.295	-1	-1.9	1334.61
DPQSHKVL	7.21	0	-1.0625	922.487
DTFSSKEKLLEELK	4.71	-1.1	-0.985714	1665.88
PPPPPP	5.937	0	-1.6	600.327
N(+.98)PVLRKL	11.315	2	-0.242857	839.523
SPLPDLFPADFK	4.132	-1	-0.125	1345.69
ELTKEEKLYL	4.563	-1.1	-0.89	1264.69
TPKKPKKA	10.944	3.9	-2.2125	896.581
LVHQHQTTMDPQSHKVLL	7.562	0	-0.533333	2111.09
LQ(+.98)LTKEEKLYLK	8.95	0.9	-0.75	1505.87
M(+42.01)ERAQ(+.98)TLLR	10.315	1	-0.6	1159.6
TPKKPK	11.006	2.9	-2.6	697.449
KVM(+15.99)PFLK	10.748	1.9	0.471429	877.51
QEQ(+.98)KKKKKL	10.644	3.9	-2.91111	1157.71
NHFRPR	12.22	2	-2.41667	825.436
WPELE	3.604	-2	-1.14	672.312
KPSYYLR	9.794	2	-1.37143	925.502
LPDKY	6.223	0	-1.3	634.333
DRLEQLK	6.587	0	-1.61429	900.503
KKATLHAVDVT	9.296	1	-0.00909091	1181.68
VEDLPNKKV	6.497	-0.1	-0.855556	1040.59
DSEKPKKL	9.136	0.9	-2.1625	943.534
EPVKKL	9.237	0.9	-0.816667	712.448
DKLELTKEEKLY	4.685	-1.1	-1.35833	1507.81
PPLKLPK	10.748	1.9	-0.714286	791.527
DTVKKL	9.227	0.9	-0.666667	702.428
SLTN(+.98)KLELTKEE	4.695	-1.1	-1.05	1404.73
EANYLGADKYF	4.028	-1	-0.654545	1289.59
ELEELH	4.041	-3	-1.01667	768.365
TK(+42.01)GPDLLPK	9.422	0.9	-0.888889	1009.58
VEDLKKV	6.497	-0.1	-0.371429	829.491
NKKLVKKL	10.944	3.9	-0.9125	969.67
PPPPP	5.937	0	-1.6	503.274
LKVNDEDKQKL	6.537	-0.1	-1.58182	1328.73
ERFVQDLSK	6.584	0	-0.988889	1120.59
VPQLE	3.887	-1	-0.12	584.317
DPATQPLVPVHNPVLN	4.949	-1	-0.14375	1709.91
EKVQKYK	9.941	1.9	-2.25714	921.528
KGNLEYK	9.018	0.9	-1.81429	850.455
DEVRKLLRL	9.38	1	-0.477778	1140.7
ADTKELVSSKVS	6.501	-0.1	-0.325	1262.67
ETLLR	6.566	0	-0.22	630.37
T(+42.01)TLTH	7.752	0	-0.3	613.307
AEEKKKKKL	10.303	2.9	-2.32222	1100.69
LPLTE	3.888	-1	0.36	571.322
DLDDKLLK	4.266	-1.1	-0.8625	958.533
DEFRKL	6.402	0	-1.46667	806.429
QEEKKKKKL	10.303	2.9	-2.91111	1157.71
DKDKEKKL	9.062	0.9	-2.7875	1002.57
RSKFR	12.261	3	-2.18	692.408
RAETLLR	10.285	1	-0.542857	857.508
LPDLFPADFK	4.149	-1	0.09	1161.61
EELLR	4.357	-1	-0.78	658.365
DQDPLTKT	4.002	-1	-1.7	916.45
EDGHVKV	5.227	-1	-0.871429	782.392
HQHQTTM(+15.99)DPQSHKVLL	7.508	0	-1.1	1914.94
PPLKLKP	10.503	1.9	-0.714286	791.527
M(+42.01)(+15.99)ERAETLLR	6.771	0	-0.6	1175.6
KFPLFK	10.748	1.9	-7.40149e-17	778.474
GAQ(+.98)EKKKKKL	10.644	3.9	-2.13	1157.71
K(+42.01)QSGVN(+.98)MTKSVVTS	10.507	1.9	-0.321429	1507.76
DTKQ(+.98)LVSSKVS	9.225	0.9	-0.518182	1191.63
EKEQ(+.98)LNVSSK	6.624	-0.1	-1.54	1161.59
DSESAPLRVYLEK	4.488	-1	-0.753846	1505.77
HESTNLSQEK	5.331	-1	-1.96	1171.55
ERAETLLR	6.701	0	-0.9125	986.551
PPKLPH	9.835	1	-1.35	687.407
DELVKKL	6.392	-0.1	-0.428571	843.506
DSPFLK	6.347	0	-0.533333	705.37
HESTNLS(+79.97)QEKYK	7.136	0	-2.06667	1542.67
HSDAVSLCVLKPDPSQK	6.827	-0.5	-0.4	1822.92
EANYLGWKYFH	7.043	0	-0.872727	1426.67
EEKVQKF	6.468	-0.1	-1.61429	906.481
DDKLLK	6.446	-0.1	-1.2	730.423
DDSLLRL	4.005	-1	-0.128571	830.45
QLEKEHH	6.147	-1	-2.42857	919.451
HQTTMDPQSHKVLL	7.387	0	-0.778571	1633.82
KLELTKEE	4.63	-1.1	-1.425	988.544
EDGPKFL	4.169	-1	-0.9	804.402
QHATKGSHVKV	10.501	2	-0.854545	1190.65
ELLKRT	9.39	1	-0.833333	758.465
LDVKKL	9.329	0.9	0.0833333	714.464
HSWVSLTTTKPDPSQK	9.426	1	-1.1625	1810.92
SPFLLKT	9.498	1	0.485714	804.475
PPLKLP	9.542	1	-0.183333	663.432
DPLTKT	6.149	0	-1.1	673.365
ELPKKTV	9.236	0.9	-0.8	813.496
KKATLH	10.748	2	-1.01667	696.428
MPFLK	9.831	1	0.6	634.351
EKVEKFK	9.295	0.9	-1.67143	906.517
SVRLED	4.297	-1	-0.716667	717.366
RVLEDRA	6.426	0	-0.885714	857.472
APWPEL	3.769	-1	-0.333333	711.359
DKYHF	6.995	0	-1.82	708.323
HLPLP	7.173	0	0.24	575.343
KVVQD	6.367	0	-0.5	587.328
KPKLAKPK	11.163	3.9	-1.65	908.617
EPPYS	3.396	-1	-1.76	591.254
LGADKYF	6.066	0	-0.1	812.407
AENYLGADKYFHA	5.151	-1	-0.661538	1497.69
M(+42.01)LKLF	9.501	1	1.68	692.393
ELEKKF	6.468	-0.1	-1.36667	792.438
SLTDKLELTKEEK	4.778	-1.1	-1.26923	1532.83
NPGLHLLL	7.32	0	0.8125	875.523
DGSKLKL	9.227	0.9	-0.7	759.449
KLLPTQ	9.407	1	-0.35	698.433
PPPPPPP	5.937	0	-1.6	697.38
APPPPPPP	5.914	0	-1.175	768.417
GPPTKKL	10.501	1.9	-1.18571	739.459
LDQNQQ(+.98)QPTEQ	3.431	-2	-2.40909	1328.58
KPEFDR	6.581	0	-2.36667	790.397
SLSSKLR	11.482	2	-0.457143	789.471
VPVH	7.752	0	0.9	450.259
EEKHHLK	7.525	0	-2.48571	919.487
HPELLQ	5.119	-1	-0.7	735.391
SPVKTL	9.498	1	0.166667	643.39
APARPPPGGPGASAPLPR	12.22	2	-0.622222	1664.91
LPLSPM(+15.99)	5.811	0	0.916667	672.352
N(+42.01)PPKAPSKKE	10.241	1.9	-2.25	1136.62
EN(+.98)YKKKL	9.906	1.9	-2.31429	922.512
DALKKKL	10.205	1.9	-0.828571	814.528
HATKGSHVKV	10.501	2	-0.59	1062.59
DPATQPLVVPHNPVLN	4.949	-1	-0.14375	1709.91
DLKQEKP	6.386	-0.1	-2.3	856.465
NPGLHL	7.32	0	-0.183333	649.355
LEDDTKVL	3.861	-2	-0.4125	931.486
VERHNKDRKV	10.422	2	-2.21	1279.71
HPLHFL	7.399	0	0.4	762.418
VM(+15.99)PFLK	9.831	1	1.2	749.415
PPPPPKY	9.106	1	-1.88571	794.433
APARPPPGGPGALAPLPR	12.22	2	-0.366667	1690.96
DTKELVSSKVS	6.39	-0.1	-0.518182	1191.63
DN(+.98)KVLRF	9.386	1	-0.657143	891.481
S(+79.97)EEKVQKF	6.547	-0.1	-1.5125	1073.48
DKALKKF	10.205	1.9	-0.971429	848.512
APARPPPGGPGASAPLRP	12.132	2	-0.622222	1664.91
DDLSKV	4.004	-1	-0.616667	675.344
LDAQKKKL	10.206	1.9	-1.1625	942.586
VGLGKKKKV	10.944	3.9	-0.466667	955.654
LPVLEKN	6.443	0	-0.1	811.48
DN(+.98)SLLRL	6.168	0	-0.128571	830.45
LPVLR	10.585	1	1.14	596.401
KGNLEYKEVVPLNTEK	6.499	-0.1	-1.075	1860
LPTQTSQ	5.916	0	-1	773.392
VEERPLKV	6.573	0	-0.6	968.565
KLALL	9.411	1	1.86	556.395
FVEKKAKLEHC	8.313	0.5	-0.618182	1330.71
M(+42.01)NHTFQTSVSGVH	7.899	0	-0.284615	1485.67
EKEKLKKL	10.033	1.9	-1.875	1014.64
DRLEEK	4.516	-1	-2.51667	788.403
KPPVV	9.41	1	0.26	538.348
PPPGGPGASAPLRP	10.375	1	-0.621429	1269.68
DDLVSK	4.026	-1	-0.616667	675.344
EPVKKV	9.236	0.9	-0.75	698.433
TPLVKKL	10.501	1.9	0.242857	797.537
LLPTET	3.764	-1	0.183333	672.369
SKSRKF	11.485	2.9	-1.85	751.434
DLKLDLR	6.46	0	-0.571429	871.513
M(+42.01)NHTF	7.313	0	-0.54	690.279
M(+42.01)(+15.99)NHTFQTSVSGVH	7.899	0	-0.284615	1501.66
DDFQHRKF	7.225	0	-2.0625	1091.51
LPAPLTQ	5.916	0	0.285714	738.428
VEPNKKV	9.329	0.9	-1.14286	812.476
ETLLPK	6.516	0	-0.35	699.417
M(+42.01)(+15.99)LKLF	9.501	1	1.68	708.388
TPVTKL	9.502	1	0.183333	657.406
PPPPYK	9.106	1	-1.93333	697.38
ELTKEE	4.078	-2	-1.88333	747.365
KVREVK	10.554	1.9	-1.23333	757.481
TVNTVLGSKLLPTQ	9.502	1	0.285714	1469.85
TKENKHLVM(+15.99)	9.322	1	-0.977778	1114.58
LPLL	5.92	0	2.45	454.315
PLTKT	9.542	1	-0.62	558.338
TPKGEKFPSMSEA	6.551	-0.1	-1.09231	1407.67
PPKLHP	9.545	1	-1.35	687.407
DEEKNFKA	4.488	-1.1	-2.15	979.461

## Sheet: Table S13
Table S13. Physicochemical characteristics of endogenous peptides by de novo in ultrafiltration (M2) method.
Ultrafiltration (M2)	Average_pI	pH_7.4_charge	GRAVY	Mass
DPDTAHPHL	4.932	-2	-1.3	1001.46
KHESTNLSQEKYK	8.957	0.9	-2.20769	1590.8
HESTNLSQEKYK	7.136	0	-2.06667	1462.71
DDDKLCKTKKL	8.124	0.5	-1.51818	1305.7
LETKEEKLYL	4.598	-1.1	-0.89	1264.69
DPQSHKVLL	7.21	0	-0.522222	1035.57
EEKLYLK	6.416	-0.1	-1.21429	921.517
ELTKEEKLYLK	6.495	-0.1	-1.16364	1392.79
ELTKEEKLY	4.59	-1.1	-1.41111	1151.61
HESTNLSQEK	5.331	-1	-1.96	1171.55
HESTNLSQEKY	5.295	-1	-1.9	1334.61
DLDDKLLK	4.266	-1.1	-0.8625	958.533
ELTKEEKLYL	4.563	-1.1	-0.89	1264.69
DELVKKL	6.392	-0.1	-0.428571	843.506
EEVVKKL	6.464	-0.1	-0.371429	843.506
KHESTNLSQEKY	7.167	0	-2.06667	1462.71
DDPVLKKL	6.28	-0.1	-0.575	926.544
DEEKNFKA	4.488	-1.1	-2.15	979.461
DPNHFRPR	10.318	1	-2.45	1037.52
PPPPPP	5.937	0	-1.6	600.327
EDGHVKV	5.227	-1	-0.871429	782.392
DAAKKRVKA	10.724	2.9	-1.12222	985.603
DPQSHKVL	7.21	0	-1.0625	922.487
EKEELNVSSK	4.618	-1.1	-1.54	1161.59
M(+42.01)EAHE	4.381	-2	-1.3	657.243
EEKVQKF	6.468	-0.1	-1.61429	906.481
DPLTKT	6.149	0	-1.1	673.365
LPDKY	6.223	0	-1.3	634.333
WPELE	3.604	-2	-1.14	672.312
ELEKKF	6.468	-0.1	-1.36667	792.438
ETLLR	6.566	0	-0.22	630.37
M(+42.01)Q(+.98)GAEEKKKKKL	10.303	2.9	-1.90833	1459.81
EPVKKL	9.237	0.9	-0.816667	712.448
EQQ(+.98)GEQMAERY	4.045	-2	-2.13636	1368.56
DDKLLK	6.446	-0.1	-1.2	730.423
M(+42.01)EVKPPP	6.428	0	-0.871429	838.426
DRLEE	3.953	-2	-2.24	660.308
VEDLKKV	6.497	-0.1	-0.371429	829.491
EELKKL	6.464	-0.1	-1.2	758.454
EEERPPL	4.051	-2	-2.05714	868.429
DN(+.98)GLSAAARKQ	9.379	1	-0.990909	1130.57
ELTKEE	4.078	-2	-1.88333	747.365
K(+42.01)DRLEE	4.529	-1	-2.51667	830.413
LQ(+.98)LTKEEKLYKL	8.883	0.9	-0.75	1505.87
LLEELK	4.464	-1	0.0833333	743.443
M(+42.01)DQ(+.98)EDKAFKQ	4.406	-1.1	-1.88	1281.55
DAQDKLY	3.99	-1	-1.44286	851.403
DSEKATKV	6.391	-0.1	-1.2875	876.455
DDERKL	4.369	-1	-2.51667	774.387
DGN(+.98)KPVRM	9.381	1	-1.4125	916.444
LPPPPP	5.911	0	-0.7	616.358
A(+42.01)DKEKKKKESL	9.913	1.9	-2.29091	1344.76
EKEQ(+.98)LNVSSK	6.624	-0.1	-1.54	1161.59
EELKWK	6.624	-0.1	-1.98333	831.449
DAAQGRPGGAW	6.17	0	-0.890909	1084.5
WGQEN(+.98)GHVKV	7.305	0	-1.09	1153.55
AKDMW	6.287	0	-0.92	649.289
EEEL	3.218	-3	-1.675	518.222
LDQ(+.98)ASKQLTPQ	6.281	0	-1.05455	1228.63
EN(+.98)VETSKKW	6.465	-0.1	-1.83333	1120.54
LPPPTE	3.888	-1	-0.866667	652.343
DEDKYL	3.794	-2	-1.98333	781.349
LPPPYD	3.569	-1	-0.966667	700.343
KGNLEYK	9.018	0.9	-1.81429	850.455
DDDWLR	3.742	-2	-2.01667	818.356
M(+42.01)DKL	6.269	0	-0.425	547.268
DN(+.98)HLVRL	7.225	0	-0.414286	866.461
HEGQQQREVEHQDK	5.296	-2	-2.78571	1746.8
LETKEEKL	4.626	-1.1	-1.425	988.544
PPLKLP	9.542	1	-0.183333	663.432
KHESTNLSQEK	7.377	0	-2.13636	1299.64
EELKLKKV	9.139	0.9	-0.8625	985.617
NEDPLTKT	4.211	-1	-1.7	916.45
EANYLGADKYFHA	5.087	-1	-0.661538	1497.69
EDQ(+.98)DKAFKQ	4.371	-1.1	-2.3	1108.5
M(+15.99)PEDKYLKF	6.284	-0.1	-1.02222	1185.57
SEEKVQKF	6.547	-0.1	-1.5125	993.513
M(+42.01)EGAEEKKK	6.752	-0.1	-2.1	1090.53
LEELKWK	6.707	-0.1	-1.15714	944.533

## Sheet: Table S14
Table S14. Distribution of amino acid composition by de novo
Amino Acid	TCA precipitation (M1)	Ultrafiltration (M2)
Lys (K)	0.167	0.181
Leu (L)	0.157	0.136
Pro (P)	0.109	0.064
Glu (E)	0.091	0.164
Val (V)	0.059	0.039
Thr (T)	0.056	0.037
Asp (D)	0.053	0.08
Ser (S)	0.05	0.037
Ala (A)	0.039	0.039
His (H)	0.037	0.028
Gln (Q)	0.035	0.048
Arg (R)	0.032	0.023
Phe (F)	0.028	0.014
Asn (N)	0.027	0.028
Gly (G)	0.023	0.022
Tyr (Y)	0.021	0.03
Met (M)	0.012	0.016
Trp (W)	0.003	0.012
Cys (C)	0.001	0.002
