# Supplementary material for: Characterization and biological function analysis of endogenous peptides derived from donkey colostrum proteins
Source: Royal Society of Chemistry journal article supplement (doi:10.1039/d3fo01703f), 2023-01-01
Supplement: d3fo01703f4.pdf [file d3fo01703f4.pdf]

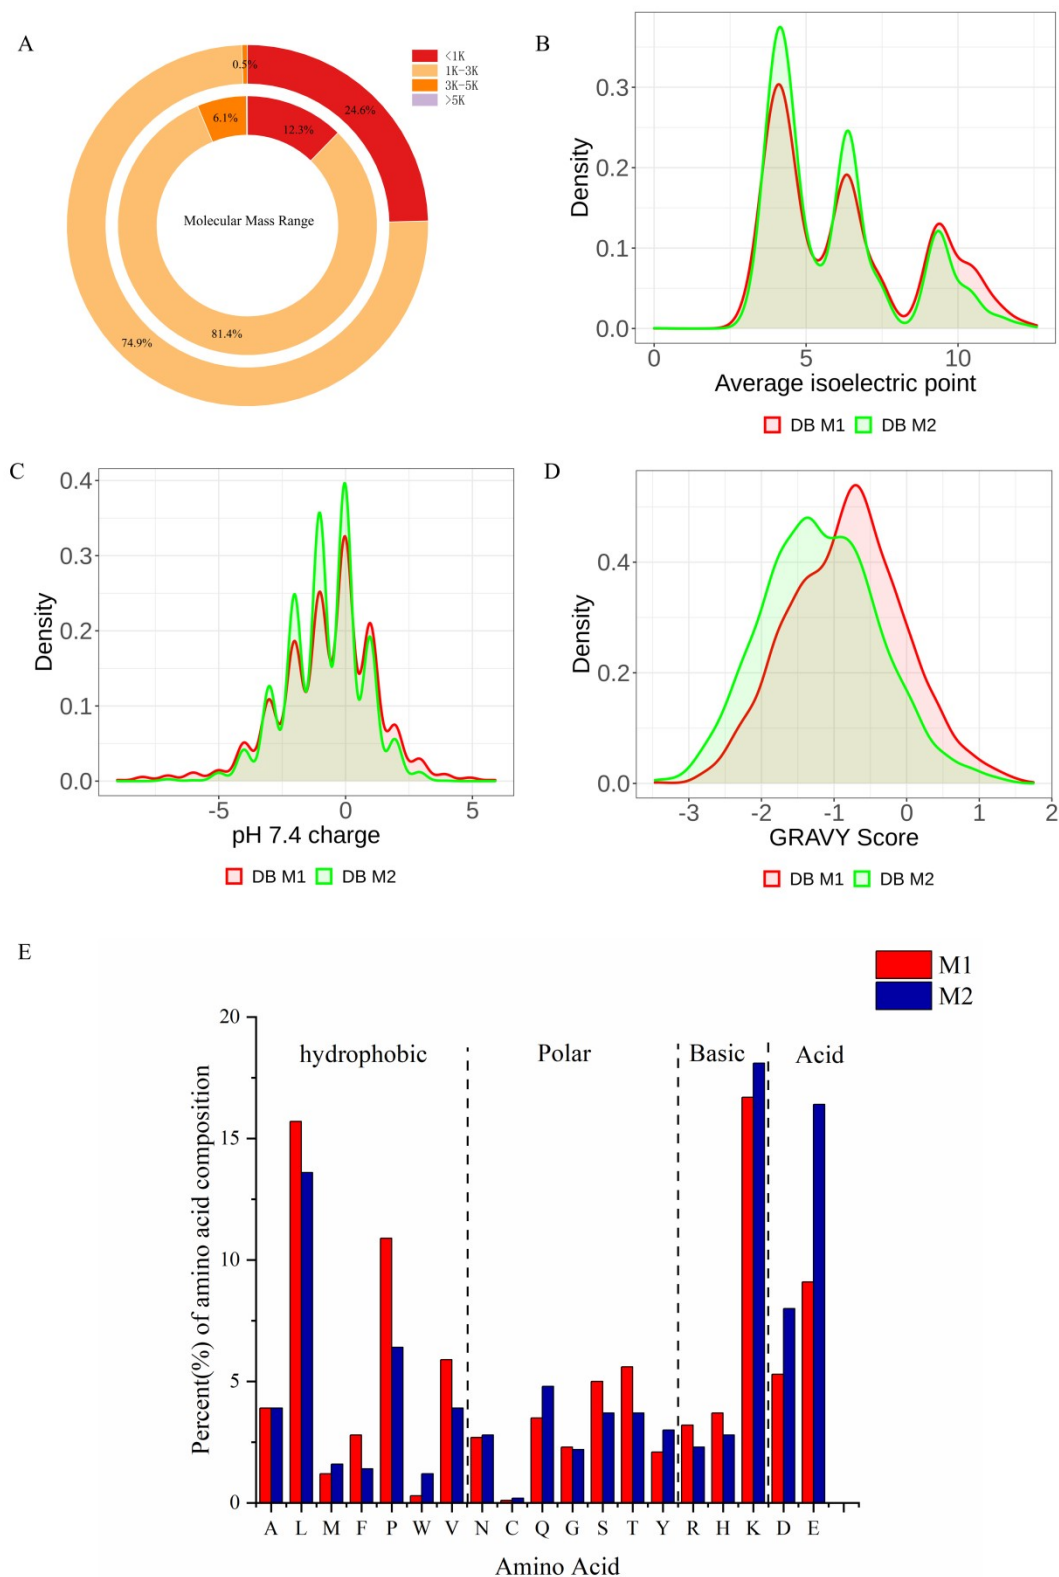

Fig. S1. Differences in donkey milk peptides from M1 (TCA precipitation) and M2 (Ultrafiltration) samples identified by database search. Peptides density charts show the physicochemical properties of each sample: molecular weight distribution of peptides (A), distribution of peptides average isoelectric point (B), peptides net charge at pH 7.4 (C), peptides gravity score (D), and distribution of amino acid composition (E). In the molecular weight distribution graph, the inner ring represents the molecular weight distribution of the endogenous peptide identified by TCA precipitation method, and the outer ring represents the molecular weight distribution of the endogenous peptide identified by ultrafiltration method.

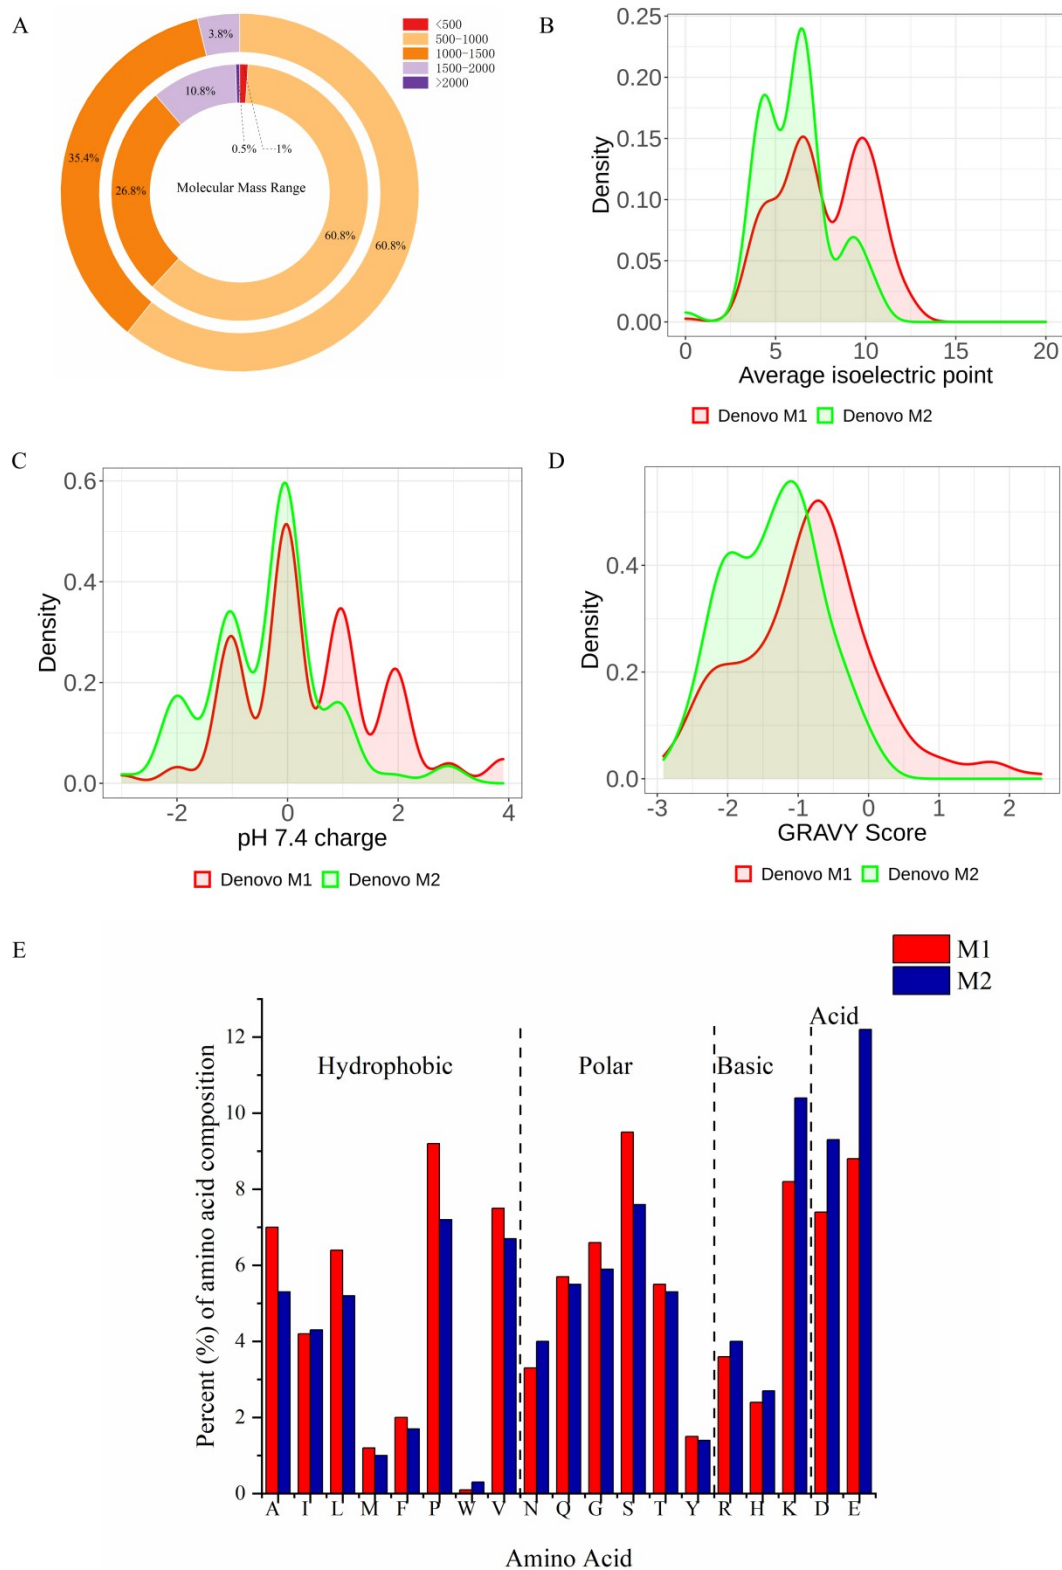

Fig. S2. Differences in donkey milk peptides from M1 (TCA precipitation) and M2 (Ultrafiltration) samples identified by *de novo*. Peptides density charts show the physicochemical properties of each sample: molecular weight distribution of peptides (A), distribution of peptides average isoelectric point (B), peptides net charge at pH 7.4 (C), peptides gravity score (D), and distribution of amino acid composition (E). In the molecular weight distribution graph, the inner ring represents the molecular weight distribution of the endogenous peptide identified by TCA precipitation method, and the outer ring represents the molecular weight distribution of the endogenous peptide identified by ultrafiltration method.

Table S1

Enzyme patterns predicted by Enzyme Predictor <sup>25</sup>.

| Enzyme name                                                        | P4                    | P3     | P2           | P1       | P1'                       | P2' |
|--------------------------------------------------------------------|-----------------------|--------|--------------|----------|---------------------------|-----|
| Arg-C proteinase                                                   | -                     | -      | -            | R        | -                         | -   |
| Asp-N endopeptidase                                                | -                     | -      | -            | -        | D                         | -   |
| Caspase 1                                                          | F, W, Y, or L         | -      | H, A<br>or T | D        | not P, E, D, Q, K<br>or R | -   |
| Caspase 2                                                          | D                     | V      | A            | D        | not P, E, D, Q, K<br>or R | -   |
| Caspase 3                                                          | D                     | M      | Q            | D        | not P, E, D, Q, K<br>or R | -   |
| Caspase 4                                                          | L                     | E      | V            | D        | not P, E, D, Q, K<br>or R | -   |
| Caspase 5                                                          | L or W                | E      | H            | D        | -                         | -   |
| Caspase 6                                                          | V                     | E      | H or<br>I    | D        | not P, E, D, Q, K<br>or R | -   |
| Caspase 7                                                          | D                     | E      | V            | D        | not P, E, D, Q, K<br>or R | -   |
| Caspase 8                                                          | I or L                | E      | T            | D        | not P, E, D, Q, K<br>or R | -   |
| Caspase 9                                                          | L                     | E      | H            | D        | -                         | -   |
| Caspase 10                                                         | I                     | E      | A            | D        | -                         | -   |
| Chymotrypsin-high specificity (C-<br>term to [FYW], not before P)  | -                     | -      | -            | F or Y   | not P                     | -   |
|                                                                    | -                     | -      | -            | W        | not M or P                | -   |
|                                                                    | -                     | -      | -            | F,L or Y | not P                     | -   |
| Chymotrypsin-low specificity (C-<br>term to [FYWML], not before P) | -                     | -      | -            | W        | not M or P                | -   |
|                                                                    | -                     | -      | -            | M        | not P or Y                | -   |
|                                                                    | -                     | -      | -            | H        | not D,M,P or W            | -   |
| Enterokinase                                                       | D or N                | D or N | D or<br>N    | K        | -                         | -   |
| Factor Xa                                                          | A,F,G,I,L,T,V<br>or M | D or E | G            | R        | -                         | -   |
| Formic acid                                                        | -                     | -      | -            | D        | -                         | -   |
| Glutamyl endopeptidase                                             | -                     | -      | -            | E        | -                         | -   |

|                                        |                    |                      |          |                     |                  |        |
|----------------------------------------|--------------------|----------------------|----------|---------------------|------------------|--------|
| GranzymeB                              | I                  | E                    | P        | D                   | -                | -      |
| Hydroxylamine                          | -                  | -                    | -        | N                   | G                | -      |
| Iodosobenzoic acid                     | -                  | -                    | -        | W                   | -                | -      |
| LysC                                   | -                  | -                    | -        | K                   | -                | -      |
| NTCB (2-nitro-5-thiocyanobenzoic acid) | -                  | -                    | -        | -                   | C                | -      |
| Pepsin (pH1.3)                         | -                  | not H,K, or R        | not P    | not R               | F,L,W or Y       | not P  |
| Pepsin (pH>2)                          | -                  | not H,K or R         | not P    | F,L,W or Y          | -                | not P  |
| Proline-endopeptidase                  | -                  | -                    | H,K or R | P                   | not P            | -      |
| Staphylococcal peptidase I             | -                  | -                    | not E    | E                   | -                | -      |
| Thrombin                               | A,F,G,I,L,T,V or M | A,F,G,I,L,T,V,W or A | G        | R                   | G                | -      |
| Trypsin (please note the exceptions!)  | -                  | -                    | P        | R                   | not D or E       | not DE |
| Modified-chymotrypsin                  | -                  | -                    | -        | K or R              | not P            | -      |
| elastase                               | -                  | -                    | W        | K                   | P                | -      |
| Cyanogen-bromide                       | -                  | -                    | M        | R                   | P                | -      |
| Proline-endopeptidase_diff             | -                  | -                    | -        | F,W,Y or L          | not P            | -      |
| Plasmin                                | -                  | -                    | -        | A,V,I,L,G or R      | G,P,A,L or F     | -      |
| CathepsinD                             | -                  | -                    | -        | M                   | -                | -      |
|                                        | -                  | -                    | -        | P                   | -                | -      |
|                                        | -                  | -                    | -        | K or R              | -                | -      |
|                                        | -                  | -                    | -        | A,V,L,I,P,M ,F or W | A,V,L,I,P,M or F | -      |

---

Table S2.

Predicted Enzymes, cleavage sites, and Counts for donkey milk main proteins.

| Enzymes                  | N-terminus cleavage count | C-terminus cleavage count | Total cleavage | Unique cleavage | Number of expected cleavages within the peptide | Number of proteins cleaved | Odds Ratio | Std. Error |
|--------------------------|---------------------------|---------------------------|----------------|-----------------|-------------------------------------------------|----------------------------|------------|------------|
| Plasmin                  | 806                       | 541                       | 1347           | 0               | 3598                                            | 11                         | 1.65       | 1.03       |
| Trypsin1                 | 803                       | 539                       | 1342           | 0               | 3522                                            | 11                         | 1.68       | 1.03       |
| Clostripain              | 465                       | 214                       | 679            | 0               | 1084                                            | 11                         | 2.74       | 1.04       |
| Argcproteinase           | 465                       | 214                       | 679            | 0               | 1084                                            | 11                         | 2.74       | 1.04       |
| CathepsinD               | 426                       | 598                       | 1024           | 0               | 6386                                            | 11                         | 0.65       | 1.03       |
| Elastase                 | 414                       | 444                       | 858            | 0               | 5623                                            | 11                         | 0.62       | 1.04       |
| Modifiedchymotrypsin     | 404                       | 419                       | 823            | 0               | 2532                                            | 11                         | 1.40       | 1.04       |
| Chymotrypsinlow1         | 382                       | 411                       | 793            | 0               | 2480                                            | 11                         | 1.38       | 1.04       |
| AspNendopeptidase        | 349                       | 96                        | 445            | 0               | 3475                                            | 11                         | 0.53       | 1.05       |
| LysC                     | 341                       | 327                       | 668            | 0               | 2514                                            | 11                         | 1.13       | 1.04       |
| Pepsin(pH1.3)2           | 239                       | 179                       | 418            | 0               | 1509                                            | 11                         | 1.18       | 1.05       |
| Formicacid               | 239                       | 233                       | 472            | 0               | 3645                                            | 11                         | 0.53       | 1.05       |
| Pepsin(pH>2)2            | 201                       | 141                       | 342            | 0               | 1196                                            | 11                         | 1.22       | 1.06       |
| staphprotease            | 189                       | 140                       | 329            | 0               | 2633                                            | 11                         | 0.52       | 1.06       |
| Pepsin(pH1.3)1           | 189                       | 424                       | 613            | 0               | 2073                                            | 11                         | 1.26       | 1.04       |
| Glutamylendopeptidase    | 189                       | 140                       | 329            | 0               | 2633                                            | 11                         | 0.52       | 1.06       |
| StaphylococcalpeptidaseI | 173                       | 132                       | 305            | 0               | 2398                                            | 11                         | 0.53       | 1.06       |
| Pepsin(pH>2)1            | 170                       | 382                       | 552            | 0               | 1791                                            | 11                         | 1.32       | 1.04       |
| Chymotrypsinhigh1        | 163                       | 137                       | 300            | 0               | 840                                             | 11                         | 1.52       | 1.06       |
| Prolineendopeptidasediff | 141                       | 174                       | 315            | 1               | 3106                                            | 11                         | 0.42       | 1.06       |
| Chymotrypsinlow4         | 63                        | 107                       | 170            | 0               | 540                                             | 8                          | 1.34       | 1.08       |
| Cyanogenbromide          | 39                        | 23                        | 62             | 3               | 220                                             | 10                         | 1.19       | 1.14       |
| CNBr                     | 39                        | 23                        | 62             | 3               | 220                                             | 10                         | 1.19       | 1.14       |
| Chymotrypsin             | 39                        | 23                        | 62             | 3               | 217                                             | 10                         | 1.21       | 1.14       |

|                          |    |   |    |   |     |   |      |      |  |
|--------------------------|----|---|----|---|-----|---|------|------|--|
| nlow3                    |    |   |    |   |     |   |      |      |  |
| Prolineendop<br>eptidase | 30 | 4 | 34 | 1 | 162 | 4 | 0.89 | 1.19 |  |
| Iodosobenzoi<br>cacid    | 22 | 8 | 30 | 0 | 49  | 3 | 2.60 | 1.23 |  |
| iodosobenzoa<br>te       | 22 | 8 | 30 | 0 | 49  | 3 | 2.60 | 1.23 |  |
| Chymotrypsi<br>nlow2     | 22 | 8 | 30 | 0 | 49  | 3 | 2.60 | 1.23 |  |
| Chymotrypsi<br>nhigh2    | 22 | 8 | 30 | 0 | 49  | 3 | 2.60 | 1.23 |  |
| Hydroxylami<br>ne        | 8  | 5 | 13 | 0 | 60  | 3 | 0.92 | 1.34 |  |
| Thrombin1                | 4  | 0 | 4  | 0 | 8   | 1 | 2.12 | 1.87 |  |

---

Table S3.

RMSD value for ligand ETGE, HL1, and NXA docked with Keap1, DPP-IV, and ACE.

| Ligand ID | Proteins              | RMSD  | 3D diagram of ligands before and after docking                                      |
|-----------|-----------------------|-------|-------------------------------------------------------------------------------------|
| ETGE      | Keap1 (PDB ID: 2FLU)  | 0.813 | 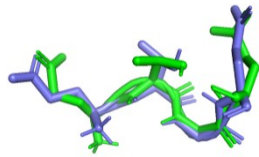 |
| HL1       | DPP-IV (PDB ID: 5J3J) | 0.002 |  |
| NXA       | ACE (PDB ID: 1O8A)    | 0.504 |  |
